# Supplementary material for: Comparative phenotypic and transcriptomic analyses reveal the potential molecular basis of forming bigger leaf blade in autotetraploid castor bean
Source: Research Square preprint supplement (doi:10.21203/rs.3.rs-6112925/v1), 2025-03-03
Supplement: Supplementary file 1 [file 2ec484bd33c205c1e3ead5e2.xlsx]

## Sheet: Table S1
Table S1 The primer sequences for quantitative real time PCR.
Gene ID	symbol	premier-F	premier-R
J2O13_01G002690	EXPA4	ATTTCGACCTCGCTATGCCC	GGCTCATGCTCATCCAACCA
J2O13_02G004853	SAUR51	CAGCGGTCATCAAACAGATCC	CCCAAACTCTTCTTCAGCTTGT
J2O13_07G015811	Xyl2	ATAGGGAGTGTGCTGAGTGGT	ATATACATGCCTGGTCACTCCAA
J2O13_03G006121	IAA29	TGAGGCACTGATTCGGACAC	TGAGACGAGAGTGAGTGGGT
J2O13_02G004547	CYCD3-3	GCTGCTGTGGCTTGTCTTTC	TGATAAAGCTTGCCTGAGATGA
J2O13_09G020749	XTH6	TGTTGGTGGGTCTAGTCGTG	GGAGTAACAACCAGCAGCATC
J2O13_09G019643	SAUR71	AAATCACTTCCGCACCTCCA	GCTTCGTCGTCACTGGAATC
J2O13_05G009467	TIR1	AAAGGGCTGGAGTCTGTTGG	AAGTGGGTGAAATTGGGGCA

## Sheet: Table S2
Table S2 Statistics of all samples transcriptome sequencing.
Sample	RawReads(M)	RawBases(G)	CleanReads(M)	CleanBases(G)	ValidBases(%)	Q30(%)	GC(%)
Diploid1	53.34	7.57	47.63	6.76	89.31	93.7	43.86
Diploid2	54.8	7.78	49.56	7.03	90.45	93.93	43.8
Diploid3	53.25	7.59	48.53	6.92	91.14	94.09	43.92
Tetraploid1	45.85	6.57	42.9	6.15	93.57	92.51	43.32
Tetraploid2	45.28	6.5	42.47	6.1	93.79	92.71	43.25
Tetraploid3	49.12	7	45.67	6.51	92.98	92.41	43.36

## Sheet: Table S3
Table S3 Statistics of alignment rates to the reference genome for each sample.
Sample	Total reads	Total mapped reads	Multiple mapped	Uniquely mapped	Read-1	Read-2	Reads map to '+'	Reads map to '-'	Non-splice reads	Splice reads	Reads mapped in proper pairs
Diploid1	47634814	46753402(98.15%)	1399906(2.94%)	45353496(95.21%)	22737221(47.73%)	22616275(47.48%)	22674714(47.60%)	22678782(47.61%)	28401903(59.62%)	16951593(35.59%)	44736990(93.92%)
Diploid2	49564164	48662838(98.18%)	1381517(2.79%)	47281321(95.39%)	23700212(47.82%)	23581109(47.58%)	23636640(47.69%)	23644681(47.71%)	29687972(59.90%)	17593349(35.50%)	46642750(94.11%)
Diploid3	48527860	47658908(98.21%)	1419705(2.93%)	46239203(95.28%)	23181590(47.77%)	23057613(47.51%)	23119059(47.64%)	23120144(47.64%)	28943139(59.64%)	17296064(35.64%)	45608588(93.98%)
Tetraploid1	42901584	41696383(97.19%)	1141955(2.66%)	40554428(94.53%)	20252824(47.21%)	20301604(47.32%)	20264181(47.23%)	20290247(47.29%)	25913216(60.40%)	14641212(34.13%)	40027598(93.30%)
Tetraploid2	42467630	41152005(96.90%)	1062285(2.50%)	40089720(94.40%)	20028320(47.16%)	20061400(47.24%)	20037250(47.18%)	20052470(47.22%)	25656681(60.41%)	14433039(33.99%)	39601178(93.25%)
Tetraploid3	45673360	43543197(95.34%)	1275182(2.79%)	42268015(92.54%)	21113351(46.23%)	21154664(46.32%)	21121141(46.24%)	21146874(46.30%)	27235438(59.63%)	15032577(32.91%)	41701346(91.30%)

## Sheet: Table S4
Table S4 List of differentially expressed genes identified in the diploids and tetraploids including their FPKM value, functional annotations and fold change and up-down expressed relation among different ploid level materials.
Gene ID	BaseMean_DESeq2	BaseMean_control_Diploid	BaseMean_case_Tetraploid	FoldChange	log2FoldChange	p-value	q-value	Regulation	FPKM_Tetraploid1	FPKM_Tetraploid2	FPKM_Tetraploid3	FPKM_Diploid1	FPKM_Diploid2	FPKM_Diploid3	symbol	description	pathway	pathway_description	GO_ID	GO_term
J2O13_01G000008	29.9888	56.3585	3.61909	0.0638735	-3.96864	5.31E-09	5.77E-08	Down	0.0284819	0.0860037	0.0411357	0.59704	0.479272	0.953688	NPF7.3	Protein NRT1/ PTR FAMILY 7.3			GO:0016020,GO:0005886,GO:0015112,GO:0015386,GO:0015293,GO:0022857,GO:0010150,GO:0015706,GO:0055075,GO:1902600,GO:0010167,GO:0055085	membrane|plasma membrane|nitrate transmembrane transporter activity|potassium:proton antiporter activity|symporter activity|transmembrane transporter activity|leaf senescence|nitrate transmembrane transport|potassium ion homeostasis|proton transmembrane transport|response to nitrate|transmembrane transport
J2O13_01G000011	2029.38	2830.24	1228.52	0.434091	-1.20393	6.79E-08	6.10E-07	Down	46.8429	61.676	50.242	107.12	108.272	83.5001
J2O13_01G000015	30.033	45.9633	14.1027	0.306367	-1.70667	0.000250105	0.00106966	Down	0.932238	1.62074	1.06081	3.408	2.64349	3.68905
J2O13_01G000031	2885.71	4322.62	1448.8	0.335196	-1.57692	5.64E-13	1.09E-11	Down	26.6931	34.6777	35.9692	81.2055	88.917	67.0714	FLZ2	FCS-Like Zinc finger 2			GO:0019900,GO:0046872,GO:0009749,GO:1905582,GO:0042594,GO:0009744	kinase binding|metal ion binding|response to glucose|response to mannose|response to starvation|response to sucrose
J2O13_01G000043	22.7419	11.9702	33.5137	2.79179	1.48119	0.0158805	0.0400338	Up	0.746475	0.469594	0.359372	0.15967	0.0893576	0.22131	At1g28695	Uncharacterized protein At1g28695
J2O13_01G000048	7627.02	10681.4	4572.66	0.428104	-1.22397	2.56E-17	8.42E-16	Down	22.8043	22.2162	20.3741	44.2166	41.7614	39.3061	At1g02150	Pentatricopeptide repeat-containing protein At1g02150			GO:0009507,GO:0005739,GO:0003729	chloroplast|mitochondrion|mRNA binding
J2O13_01G000049	17.7046	5.07976	30.3294	6.0063	2.58648	1.70E-05	9.56E-05	Up	0.830048	0.754617	0.876555	0.114546	0.131872	0.0896559
J2O13_01G000082	7.80993	15.6199	0	0.0115244	-6.43916	0.00526274	0.0154848	Down	0	0	0	0.0161464	0.0154906	0.36334	LHA1	Plasma membrane ATPase 1	ko00190	Oxidative phosphorylation	GO:0016020,GO:0005886,GO:0005524,GO:0016887,GO:0046872,GO:0015662,GO:0008553,GO:0034220,GO:0120029,GO:1902600,GO:0051453	membrane|plasma membrane|ATP binding|ATP hydrolysis activity|metal ion binding|P-type ion transporter activity|P-type proton-exporting transporter activity|ion transmembrane transport|proton export across plasma membrane|proton transmembrane transport|regulation of intracellular pH
J2O13_01G000088	128.496	204.988	52.0051	0.2538	-1.97824	5.75E-08	5.22E-07	Down	1.23245	0.671934	0.791106	3.3831	2.86632	2.42158	HAT3	Homeobox-leucine zipper protein HAT3			GO:0005634,GO:0003700,GO:0000981,GO:0043565	nucleus|DNA-binding transcription factor activity|DNA-binding transcription factor activity, RNA polymerase II-specific|sequence-specific DNA binding
J2O13_01G000100	2865.02	3889.02	1841.01	0.4734	-1.07887	0.00170888	0.00585279	Down	34.864	45.7149	32.2034	75.3275	77.8218	40.0377
J2O13_01G000104	10.504	0	21.008	113.358	6.82475	0.000139062	0.000636627	Up	0.456725	0.0593171	0.425572	0	0	0	SPL7	Squamosa promoter-binding-like protein 7			GO:0005634,GO:0003677,GO:0046872	nucleus|DNA binding|metal ion binding
J2O13_01G000105	82.3641	52.2227	112.505	2.1552	1.10782	0.00147051	0.00513701	Up	2.93276	3.25041	5.0765	1.21233	1.56882	1.51714
J2O13_01G000112	178.957	6.72889	351.186	52.2829	5.70827	2.34E-33	3.39E-31	Up	10.1077	8.57678	8.52487	0.0656815	0.273059	0.0856822	EXPB2	Putative expansin-B2			GO:0005576,GO:0016020,GO:0009828,GO:0019953,GO:0009826	extracellular region|membrane|plant-type cell wall loosening|sexual reproduction|unidimensional cell growth
J2O13_01G000114	153.212	71.5497	234.874	3.27626	1.71205	5.33E-05	0.000267688	Up	3.5748	2.8224	5.30509	0.575238	0.90184	1.50996	ZAT9	Zinc finger protein ZAT9			GO:0005634,GO:0003700,GO:0046872,GO:0000976,GO:0006355	nucleus|DNA-binding transcription factor activity|metal ion binding|transcription cis-regulatory region binding|regulation of DNA-templated transcription
J2O13_01G000116	358.615	661.697	55.5329	0.0839749	-3.5739	4.31E-10	5.51E-09	Down	1.27028	1.25248	1.84712	19.0753	17.7898	4.70913	SPX3	SPX domain-containing protein 3			GO:0016036,GO:0080040	cellular response to phosphate starvation|positive regulation of cellular response to phosphate starvation
J2O13_01G000125	118.883	7.27211	230.493	32.0943	5.00425	1.61E-15	4.29E-14	Up	5.39307	5.29392	7.99472	0.182744	0.262982	0.0223492	RGF10	Root meristem growth factor 10			GO:0005576,GO:0005634,GO:0008083,GO:0030154,GO:0048527,GO:2000280,GO:2000067,GO:0009733	extracellular region|nucleus|growth factor activity|cell differentiation|lateral root development|regulation of root development|regulation of root morphogenesis|response to auxin
J2O13_01G000129	4.68565	0	9.3713	50.5849	5.66063	0.00228183	0.00751948	Up	0.187249	0.0685353	0.229464	0	0	0	RITF1	Protein RGF1 INDUCIBLE TRANSCRIPTION FACTOR 1			GO:0005634,GO:0046872,GO:0010078,GO:2000377,GO:2000280,GO:0043434	nucleus|metal ion binding|maintenance of root meristem identity|regulation of reactive oxygen species metabolic process|regulation of root development|response to peptide hormone
J2O13_01G000135	2206.32	3411.56	1001.08	0.293419	-1.76897	4.38E-13	8.56E-12	Down	14.5956	22.5072	19.6206	47.8863	42.4699	70.5352	YAB1	Axial regulator YABBY 1			GO:0005634,GO:0003700,GO:0046872,GO:0000976,GO:0010158,GO:0045165,GO:0010154,GO:0010450,GO:0009933,GO:0009944,GO:0009909,GO:2000024,GO:1902183,GO:0010093,GO:0090706	nucleus|DNA-binding transcription factor activity|metal ion binding|transcription cis-regulatory region binding|abaxial cell fate specification|cell fate commitment|fruit development|inflorescence meristem growth|meristem structural organization|polarity specification of adaxial/abaxial axis|regulation of flower development|regulation of leaf development|regulation of shoot apical meristem develo…
J2O13_01G000136	828.537	1114.25	542.827	0.487263	-1.03723	4.78E-13	9.33E-12	Down	5.81629	5.88759	6.45034	9.16901	11.2426	10.2273	GOS12	Golgi SNAP receptor complex member 1-2	ko04130	SNARE interactions in vesicular transport	GO:0005801,GO:0005789,GO:0005768,GO:0005794,GO:0005797,GO:0000139,GO:0000325,GO:0031201,GO:0005802,GO:0005484,GO:0006888,GO:0015031,GO:0006906	cis-Golgi network|endoplasmic reticulum membrane|endosome|Golgi apparatus|Golgi medial cisterna|Golgi membrane|plant-type vacuole|SNARE complex|trans-Golgi network|SNAP receptor activity|endoplasmic reticulum to Golgi vesicle-mediated transport|protein transport|vesicle fusion
J2O13_01G000152	95705.4	142793	48618.1	0.34048	-1.55436	1.12E-12	2.05E-11	Down	386.997	386.864	305.781	974.011	891.754	725.844	TKL-2	Transketolase-2, chloroplastic	ko00030,ko00710,ko01051	Pentose phosphate pathway|Carbon fixation in photosynthetic organisms|Biosynthesis of ansamycins	GO:0009507,GO:0009570,GO:0009535,GO:0005829,GO:0009536,GO:0046872,GO:0004802,GO:0006098,GO:0019253	chloroplast|chloroplast stroma|chloroplast thylakoid membrane|cytosol|plastid|metal ion binding|transketolase activity|pentose-phosphate shunt|reductive pentose-phosphate cycle
J2O13_01G000161	366.191	219.985	512.396	2.32704	1.21849	0.00176678	0.00601982	Up	5.45999	3.86081	4.93024	1.15415	1.1374	2.87292	CRPK1	Cold-responsive protein kinase 1			GO:0005634,GO:0005886,GO:0005524,GO:0106310,GO:0004674,GO:0046777,GO:0009409,GO:0050826,GO:0009625,GO:0002237	nucleus|plasma membrane|ATP binding|protein serine kinase activity|protein serine/threonine kinase activity|protein autophosphorylation|response to cold|response to freezing|response to insect|response to molecule of bacterial origin
J2O13_01G000171	716.373	999.559	433.187	0.433478	-1.20597	1.38E-06	9.69E-06	Down	10.1449	11.7055	10.6019	22.716	22.5854	15.7004
J2O13_01G000176	819.552	352.483	1286.62	3.65119	1.86837	5.82E-27	4.93E-25	Up	14.8424	18.4931	18.6014	3.56805	4.2871	3.83667	AHL1	AT-hook motif nuclear-localized protein 1			GO:0098687,GO:0005737,GO:0005739,GO:0005730,GO:0005654,GO:0005634,GO:0003677,GO:0003680,GO:0043565	chromosomal region|cytoplasm|mitochondrion|nucleolus|nucleoplasm|nucleus|DNA binding|minor groove of adenine-thymine-rich DNA binding|sequence-specific DNA binding
J2O13_01G000180	165.578	33.9519	297.204	8.77192	3.13289	6.07E-10	7.55E-09	Up	58.395	113.236	125.793	13.5491	4.60374	9.66602	atpF	ATP synthase subunit b, chloroplastic	ko00190,ko00195	Oxidative phosphorylation|Photosynthesis	GO:0009535,GO:0045263,GO:0046933	chloroplast thylakoid membrane|proton-transporting ATP synthase complex, coupling factor F(o)|proton-transporting ATP synthase activity, rotational mechanism
J2O13_01G000192	4751.56	7054.27	2448.85	0.34715	-1.52637	0.000213089	0.000927378	Down	29.8351	42.3055	29.9209	97.3319	99.9166	40.0292	CYP704C1	Cytochrome P450 704C1			GO:0016020,GO:0020037,GO:0005506,GO:0004497,GO:0016705	membrane|heme binding|iron ion binding|monooxygenase activity|oxidoreductase activity, acting on paired donors, with incorporation or reduction of molecular oxygen
J2O13_01G000206	20.6909	32.5513	8.83044	0.271617	-1.88036	0.000628077	0.00243163	Down	0.325555	0.409602	0.352643	1.14899	1.26934	0.851632
J2O13_01G000207	58.3382	93.7236	22.9528	0.244939	-2.02951	3.04E-05	0.000160891	Down	1.05936	1.06628	0.816005	3.44426	4.31306	1.98641	HPR3	Glyoxylate/hydroxypyruvate reductase HPR3			GO:0030267,GO:0016618,GO:0051287,GO:0009854,GO:0009853	glyoxylate reductase (NADP+) activity|hydroxypyruvate reductase activity|NAD binding|oxidative photosynthetic carbon pathway|photorespiration
J2O13_01G000209	10.0291	17.7796	2.27858	0.128699	-2.95792	0.00135268	0.00476944	Down	0.0119762	0.0361632	0.0345938	0.215182	0.196611	0.110278	GA20OX2	Gibberellin 20 oxidase 2	ko00904	Diterpenoid biosynthesis	GO:0051213,GO:0103055,GO:0045544,GO:0103054,GO:0103056,GO:0046872,GO:0009908,GO:0009686,GO:0009739,GO:0009416,GO:0009639,GO:0009826	dioxygenase activity|gibberelli A15, 2-oxoglutarate:oxygen oxidoreductase activity|gibberellin 20-oxidase activity|gibberellin A12, 2-oxoglutarate:oxygen oxidoreductase activity (gibberellin A15-forming)|gibberellin A53, 2-oxoglutarate:oxygen oxidoreductase activity|metal ion binding|flower development|gibberellin biosynthetic process|response to gibberellin|response to light stimulus|response to…
J2O13_01G000212	20.6594	4.55245	36.7664	7.94697	2.9904	1.07E-05	6.27E-05	Up	0.491945	0.618947	0.407882	0.0233836	0.0448677	0.0915126	At5g51830	Probable fructokinase-7	ko00051,ko00500,ko00520	Fructose and mannose metabolism|Starch and sucrose metabolism|Amino sugar and nucleotide sugar metabolism	GO:0005829,GO:0005524,GO:0008865,GO:0016051,GO:0006633,GO:0006000,GO:0019252	cytosol|ATP binding|fructokinase activity|carbohydrate biosynthetic process|fatty acid biosynthetic process|fructose metabolic process|starch biosynthetic process
J2O13_01G000223	747.256	1099.09	395.425	0.359829	-1.47462	5.01E-10	6.30E-09	Down	2.73146	3.15739	2.62313	7.66226	6.26501	5.38876	At4g22990	SPX domain-containing membrane protein At4g22990			GO:0016020,GO:0009705,GO:0022857,GO:1905011	membrane|plant-type vacuole membrane|transmembrane transporter activity|transmembrane phosphate ion transport from cytosol to vacuole
J2O13_01G000240	53.3396	86.5583	20.1208	0.232108	-2.10713	0.000140538	0.000642226	Down	0.385374	0.193945	0.109134	0.930984	0.735004	0.768538	At4g00750	Probable methyltransferase PMT15			GO:0005737,GO:0005829,GO:0005768,GO:0005794,GO:0000139,GO:0005802,GO:0008168,GO:0032259	cytoplasm|cytosol|endosome|Golgi apparatus|Golgi membrane|trans-Golgi network|methyltransferase activity|methylation
J2O13_01G000253	19.2185	6.18642	32.2506	5.23805	2.38903	0.0183269	0.0451655	Up	1.3368	0.336382	0.84159	0.109977	0.253223	0.0215199	BAP2	BON1-associated protein 2			GO:0016020,GO:0006952	membrane|defense response
J2O13_01G000259	793.591	1086.92	500.264	0.460344	-1.11922	1.99E-08	1.96E-07	Down	6.60804	7.52887	6.49374	13.4409	12.5483	10.6754	At3g42630	Pentatricopeptide repeat-containing protein At3g42630
J2O13_01G000264	7124.85	9793.48	4456.22	0.455028	-1.13597	7.87E-06	4.75E-05	Down	17.1059	18.4039	15.2632	35.3893	32.7897	22.6563	KEA2	K(+) efflux antiporter 2, chloroplastic			GO:0009507,GO:0009706,GO:0016020,GO:0015079,GO:0015386,GO:0015078,GO:0019722,GO:0140899,GO:0042794,GO:0006813,GO:0080022,GO:2001057,GO:1900069,GO:0006885,GO:0010109,GO:2000377,GO:2000070,GO:1900140,GO:0009737,GO:0009646,GO:0009744	chloroplast|chloroplast inner membrane|membrane|potassium ion transmembrane transporter activity|potassium:proton antiporter activity|proton transmembrane transporter activity|calcium-mediated signaling|plastid gene expression|plastid rRNA transcription|potassium ion transport|primary root development|reactive nitrogen species metabolic process|regulation of cellular hyperosmotic salinity respons…
J2O13_01G000266	11.2176	1.44758	20.9875	14.973	3.90429	0.0042304	0.0127961	Up	1.54256	0.963704	0.870666	0.182042	0	0
J2O13_01G000274	2599.81	3992.25	1207.38	0.302442	-1.72527	0.00019231	0.000847491	Down	12.2361	15.8216	14.1023	47.2247	49.2729	15.4849
J2O13_01G000282	70.0434	108.766	31.3211	0.287714	-1.79729	0.000474516	0.0018973	Down	0.433164	0.184086	0.296585	0.494151	0.869145	1.29731	BSK3	Serine/threonine-protein kinase BSK3	ko04075	Plant hormone signal transduction	GO:0005829,GO:0005886,GO:0009506,GO:0005524,GO:0106310,GO:0004674,GO:0009742,GO:0006468	cytosol|plasma membrane|plasmodesma|ATP binding|protein serine kinase activity|protein serine/threonine kinase activity|brassinosteroid mediated signaling pathway|protein phosphorylation
J2O13_01G000285	14.2096	0	28.4192	153.29	7.26012	1.53E-07	1.28E-06	Up	1.49624	2.16079	1.94175	0	0	0	VCCN1	Voltage-dependent chloride channel 1, chloroplastic			GO:0009507,GO:0031969,GO:0009533,GO:0042651,GO:0005247,GO:0019684,GO:0042548,GO:0010027	chloroplast|chloroplast membrane|chloroplast stromal thylakoid|thylakoid membrane|voltage-gated chloride channel activity|photosynthesis, light reaction|regulation of photosynthesis, light reaction|thylakoid membrane organization
J2O13_01G000307	1805.83	1009.53	2602.13	2.57847	1.36652	7.47E-13	1.41E-11	Up	16.1659	16.4302	17.1449	5.49586	5.84754	4.41574	SPPL4	Signal peptide peptidase-like 4			GO:0098554,GO:0010008,GO:0030660,GO:0098553,GO:0005765,GO:0042500,GO:0033619	cytoplasmic side of endoplasmic reticulum membrane|endosome membrane|Golgi-associated vesicle membrane|lumenal side of endoplasmic reticulum membrane|lysosomal membrane|aspartic endopeptidase activity, intramembrane cleaving|membrane protein proteolysis
J2O13_01G000311	5800.91	3317.66	8284.17	2.49684	1.3201	0.00914174	0.0250103	Up	99.4493	117.21	129.554	19.8771	19.7488	79.0248	GPAT8	Probable glycerol-3-phosphate acyltransferase 8	ko00561,ko00564	Glycerolipid metabolism|Glycerophospholipid metabolism	GO:0005783,GO:0016020,GO:0090447,GO:0004366,GO:0016791,GO:0102420,GO:0016024,GO:0010143	endoplasmic reticulum|membrane|glycerol-3-phosphate 2-O-acyltransferase activity|glycerol-3-phosphate O-acyltransferase activity|phosphatase activity|sn-1-glycerol-3-phosphate C16:0-DCA-CoA acyl transferase activity|CDP-diacylglycerol biosynthetic process|cutin biosynthetic process
J2O13_01G000312	8543.41	12688.9	4397.88	0.346594	-1.52868	1.52E-18	5.78E-17	Down	30.0901	34.773	29.306	80.2373	75.294	67.0072	PHT44	Ascorbate transporter, chloroplastic			GO:0009507,GO:0009941,GO:0009706,GO:0009536,GO:0005315,GO:0015229,GO:0015882,GO:0010028	chloroplast|chloroplast envelope|chloroplast inner membrane|plastid|inorganic phosphate transmembrane transporter activity|L-ascorbic acid transmembrane transporter activity|L-ascorbic acid transmembrane transport|xanthophyll cycle
J2O13_01G000318	6178.3	8636.07	3720.52	0.430828	-1.21482	1.45E-16	4.32E-15	Down	64.0661	58.123	58.081	119.267	117.85	105.799	CAS2	L-3-cyanoalanine synthase 2, mitochondrial	ko00920,ko00270,ko00460	Sulfur metabolism|Cysteine and methionine metabolism|Cyanoamino acid metabolism	GO:0005739,GO:0004124,GO:0050017,GO:0006535,GO:0009836	mitochondrion|cysteine synthase activity|L-3-cyanoalanine synthase activity|cysteine biosynthetic process from serine|fruit ripening, climacteric
J2O13_01G000321	1756.61	2449.9	1063.31	0.434065	-1.20402	2.29E-11	3.51E-10	Down	18.6376	22.9737	21.0954	40.1738	42.6823	35.4579	UBC5	Ubiquitin-conjugating enzyme E2 5	ko04120	Ubiquitin mediated proteolysis	GO:0005634,GO:0005524,GO:0061631,GO:0004842,GO:0000209,GO:0006511	nucleus|ATP binding|ubiquitin conjugating enzyme activity|ubiquitin-protein transferase activity|protein polyubiquitination|ubiquitin-dependent protein catabolic process
J2O13_01G000336	5902.47	3402.24	8402.7	2.4699	1.30445	0.000169777	0.000761086	Up	52.5022	41.0967	49.0147	16.9255	20.5733	9.20812	FRO2	Ferric reduction oxidase 2			GO:0005886,GO:0140618,GO:0000293,GO:0046872,GO:0055072,GO:0009617,GO:0033214	plasma membrane|ferric-chelate reductase (NADH) activity|ferric-chelate reductase activity|metal ion binding|iron ion homeostasis|response to bacterium|siderophore-dependent iron import into cell
J2O13_01G000347	4151.7	5589.74	2713.67	0.485491	-1.04248	0.000293134	0.00123559	Down	23.6893	29.6669	25.7195	50.0328	51.8406	30.4263	At3g02645	Putative UPF0481 protein At3g02645			GO:0016020	membrane
J2O13_01G000353	1548.63	1014.99	2082.26	2.05157	1.03673	1.67E-08	1.67E-07	Up	47.7852	35.3931	50.1151	15.6569	19.1096	18.7107	HIPP39	Heavy metal-associated isoprenylated plant protein 39			GO:0046872	metal ion binding
J2O13_01G000355	24.394	1.23636	47.5517	36.5948	5.19357	3.29E-06	2.15E-05	Up	0.429034	0.91765	0.580915	0	0	0.044893	ACS1	1-aminocyclopropane-1-carboxylate synthase 1	ko00270,ko04016	Cysteine and methionine metabolism|MAPK signaling pathway - plant	GO:0016847,GO:0030170,GO:0009693,GO:0009835	1-aminocyclopropane-1-carboxylate synthase activity|pyridoxal phosphate binding|ethylene biosynthetic process|fruit ripening
J2O13_01G000368	17.5655	0.338988	34.792	96.3082	6.58959	8.26E-07	6.04E-06	Up	1.7716	1.52843	1.13719	0	0.0346239	0	At1g64065	Late embryogenesis abundant protein At1g64065			GO:0016020	membrane
J2O13_01G000397	2497.49	3391.02	1603.95	0.472923	-1.08032	5.59E-17	1.76E-15	Down	16.2868	18.1499	14.8121	27.1405	26.8627	32.0582	At4g01130	GDSL esterase/lipase At4g01130			GO:0005829,GO:0005576,GO:0016788,GO:0016042	cytosol|extracellular region|hydrolase activity, acting on ester bonds|lipid catabolic process
J2O13_01G000410	787.55	161.793	1413.31	8.72534	3.12521	3.11E-15	8.02E-14	Up	33.6514	18.2894	20.4442	1.62127	1.62485	3.73895	PCR6	Protein PLANT CADMIUM RESISTANCE 6			GO:0016020	membrane
J2O13_01G000420	564.169	369.193	759.144	2.05712	1.04063	7.77E-06	4.70E-05	Up	5.78746	3.77126	5.84946	2.06083	2.09795	1.98268	MSH2	DNA mismatch repair protein MSH2	ko03430,ko05200,ko05210,ko01524	Mismatch repair|Pathways in cancer|Colorectal cancer|Platinum drug resistance	GO:0032301,GO:0005634,GO:0005886,GO:0005524,GO:0140664,GO:0003684,GO:0003690,GO:0030983,GO:0006298,GO:0006312,GO:0045128,GO:0006290	MutSalpha complex|nucleus|plasma membrane|ATP binding|ATP-dependent DNA damage sensor activity|damaged DNA binding|double-stranded DNA binding|mismatched DNA binding|mismatch repair|mitotic recombination|negative regulation of reciprocal meiotic recombination|pyrimidine dimer repair
J2O13_01G000421	89.4968	6.26331	172.73	27.2416	4.76774	1.26E-27	1.16E-25	Up	2.80925	2.26208	2.88034	0.0519693	0.0747876	0.114403	TCP12	Transcription factor TCP12			GO:0005634,GO:0003700,GO:0043565,GO:0006355,GO:2000032	nucleus|DNA-binding transcription factor activity|sequence-specific DNA binding|regulation of DNA-templated transcription|regulation of secondary shoot formation
J2O13_01G000429	1294.23	1936.99	651.474	0.336374	-1.57186	1.72E-14	4.01E-13	Down	7.11715	7.84479	7.28715	19.3201	19.6926	15.0124	CHUP1	Protein CHUP1, chloroplastic			GO:0009507,GO:0009707,GO:0005829,GO:0009658,GO:0009902	chloroplast|chloroplast outer membrane|cytosol|chloroplast organization|chloroplast relocation
J2O13_01G000437	186.454	261.278	111.631	0.427404	-1.22633	1.72E-06	1.19E-05	Down	1.26532	1.62319	1.30192	2.90815	2.79003	2.32608
J2O13_01G000438	1752.18	2459.45	1044.9	0.424896	-1.23482	0.000210376	0.000916912	Down	10.9931	13.2517	13.1313	29.2877	27.2354	14.6387	CYP26-2	Peptidyl-prolyl cis-trans isomerase CYP26-2, chloroplastic			GO:0009507,GO:0009534,GO:0005739,GO:0003755,GO:0000413	chloroplast|chloroplast thylakoid|mitochondrion|peptidyl-prolyl cis-trans isomerase activity|protein peptidyl-prolyl isomerization
J2O13_01G000440	30.4346	52.5232	8.34593	0.158384	-2.65851	0.00547339	0.0160305	Down	0.0435509	0.292235	0.0279553	0.832183	0.428981	0.631912	PII-2	Piriformospora indica-insensitive protein 2			GO:0005886,GO:0044403,GO:0009610	plasma membrane|biological process involved in symbiotic interaction|response to symbiotic fungus
J2O13_01G000445	50.165	18.4444	81.8855	4.41605	2.14276	0.0115999	0.0306889	Up	5.48111	2.99047	4.24172	0.131484	0.504575	1.84387	CML15	Probable calcium-binding protein CML15			GO:0005509,GO:0030234	calcium ion binding|enzyme regulator activity
J2O13_01G000448	307.21	420.572	193.849	0.46087	-1.11757	6.93E-06	4.23E-05	Down	4.67521	7.67778	5.68613	10.895	10.4272	10.8912	HSP18.2	18.2 kDa class I heat shock protein	ko04141	Protein processing in endoplasmic reticulum	GO:0005737	cytoplasm
J2O13_01G000449	13568.5	21145.6	5991.47	0.283333	-1.81943	6.07E-36	1.04E-33	Down	112.141	109.137	94.7511	281.117	270.643	373.422	CAS	Calcium sensing receptor, chloroplastic			GO:0009507,GO:0009534,GO:0009535,GO:0005739,GO:0009536,GO:0009579,GO:0071277,GO:0009704,GO:0090333	chloroplast|chloroplast thylakoid|chloroplast thylakoid membrane|mitochondrion|plastid|thylakoid|cellular response to calcium ion|de-etiolation|regulation of stomatal closure
J2O13_01G000450	11.3139	2.22342	20.4044	8.95689	3.163	0.00218032	0.00722569	Up	0.539424	0.57688	0.973845	0	0.0553477	0.14111	RGA3	Putative disease resistance protein RGA3			GO:0043531,GO:0005524,GO:0050832	ADP binding|ATP binding|defense response to fungus
J2O13_01G000467	5734.75	8286.12	3183.39	0.384196	-1.38008	1.62E-08	1.62E-07	Down	29.4326	31.9548	29.6856	74.5365	70.0741	48.2794	SPPA	Serine protease SPPA, chloroplastic			GO:0009507,GO:0009941,GO:0009570,GO:0009534,GO:0009535,GO:0005739,GO:0004252,GO:0006508,GO:0006465	chloroplast|chloroplast envelope|chloroplast stroma|chloroplast thylakoid|chloroplast thylakoid membrane|mitochondrion|serine-type endopeptidase activity|proteolysis|signal peptide processing
J2O13_01G000468	1393	2237.24	548.751	0.245282	-2.02748	2.06E-05	0.00011322	Down	4.22292	7.13476	4.27478	22.2754	21.301	7.77227	PCMP-H8	Pentatricopeptide repeat-containing protein At1g18485			GO:0003729,GO:0008270,GO:0009451	mRNA binding|zinc ion binding|RNA modification
J2O13_01G000471	4.25658	0	8.51316	45.9093	5.52072	0.0016498	0.00567991	Up	0.727161	0.731909	0.622352	0	0	0
J2O13_01G000477	37.8974	58.2185	17.5764	0.302495	-1.72501	0.000403361	0.00164418	Down	0.0547458	0.0406024	0.0582606	0.125729	0.186846	0.101303		Cytochrome P450 CYP749A22 OS=Panax ginseng OX=4054 PE=2 SV=1			GO:0016020,GO:0020037,GO:0005506,GO:0004497,GO:0016705	membrane|heme binding|iron ion binding|monooxygenase activity|oxidoreductase activity, acting on paired donors, with incorporation or reduction of molecular oxygen
J2O13_01G000480	510.188	263.846	756.53	2.86887	1.52048	1.79E-10	2.40E-09	Up	7.53648	7.27709	7.85645	1.93784	2.7278	1.7966	FER	Receptor-like protein kinase FERONIA			GO:0043680,GO:0005886,GO:0009506,GO:0005524,GO:0004672,GO:0106310,GO:0004674,GO:0009738,GO:0009742,GO:0032922,GO:0050832,GO:0009873,GO:0009788,GO:0030308,GO:0010483,GO:0009791,GO:0046777,GO:0009741,GO:0009723,GO:0048364,GO:0010118	filiform apparatus|plasma membrane|plasmodesma|ATP binding|protein kinase activity|protein serine kinase activity|protein serine/threonine kinase activity|abscisic acid-activated signaling pathway|brassinosteroid mediated signaling pathway|circadian regulation of gene expression|defense response to fungus|ethylene-activated signaling pathway|negative regulation of abscisic acid-activated signalin…
J2O13_01G000487	284.18	83.1832	485.176	5.82719	2.5428	7.08E-16	1.95E-14	Up	13.8138	9.89875	18.172	1.7996	1.56319	2.59347	At1g69160	Protein BIG GRAIN 1-like E			GO:0005886,GO:0060918,GO:0009734,GO:0010929	plasma membrane|auxin transport|auxin-activated signaling pathway|positive regulation of auxin mediated signaling pathway
J2O13_01G000505	2010.73	3190.74	830.713	0.260357	-1.94144	1.01E-05	5.98E-05	Down	9.7198	20.5253	14.0805	54.5912	58.0933	24.9262
J2O13_01G000512	2323.6	3345.88	1301.32	0.388932	-1.36241	1.01E-07	8.82E-07	Down	12.3604	20.1974	14.1762	34.8046	34.7261	28.8838	VTE7	Alpha/beta hydrolase domain-containing protein VTE7
J2O13_01G000529	10.6935	19.3976	1.98947	0.102103	-3.29191	0.0096022	0.0260658	Down	0.0234062	0.094236	0.0225366	0.640838	0.0576383	0.431052	SNAP30	Putative SNAP25 homologous protein SNAP30	ko04911,ko04721	Insulin secretion|Synaptic vesicle cycle	GO:0005886,GO:0031201,GO:0005484,GO:0061025,GO:0015031,GO:0016192	plasma membrane|SNARE complex|SNAP receptor activity|membrane fusion|protein transport|vesicle-mediated transport
J2O13_01G000537	1273.77	2116.63	430.912	0.203601	-2.29618	2.92E-06	1.93E-05	Down	5.63958	5.98323	6.47071	28.0738	34.1446	9.0822
J2O13_01G000538	6899.15	10330	3468.26	0.335734	-1.57461	7.93E-25	5.43E-23	Down	52.6602	53.5893	42.5513	122.839	120.643	121.133	At3g23880	F-box/kelch-repeat protein At3g23880			GO:0005634	nucleus
J2O13_01G000544	631.083	80.9698	1181.2	14.6379	3.87163	8.61E-53	4.94E-50	Up	23.7303	22.038	19.8446	1.42894	1.31064	0.921793	PNC2	Cationic peroxidase 2	ko00940	Phenylpropanoid biosynthesis	GO:0005576,GO:0020037,GO:0140825,GO:0046872,GO:0042744,GO:0006979	extracellular region|heme binding|lactoperoxidase activity|metal ion binding|hydrogen peroxide catabolic process|response to oxidative stress
J2O13_01G000549	899.988	1236.92	563.052	0.455328	-1.13502	6.77E-10	8.37E-09	Down	4.23133	5.58813	6.053	9.81859	9.07626	9.75425	IPK	Isopentenyl phosphate kinase	ko00900	Terpenoid backbone biosynthesis	GO:0005829,GO:0005524,GO:0102043,GO:0016301,GO:0016310,GO:0016114	cytosol|ATP binding|isopentenyl phosphate kinase activity|kinase activity|phosphorylation|terpenoid biosynthetic process
J2O13_01G000574	167.728	231.508	103.948	0.448936	-1.15542	0.000141577	0.000646313	Down	4.11992	2.42978	3.59497	4.68162	6.81644	7.19395
J2O13_01G000588	19513.8	11181.7	27845.9	2.49038	1.31637	1.59E-06	1.10E-05	Up	521.181	464.834	463.582	197.116	163.215	112.265	EXPA1	Expansin-A1			GO:0005576,GO:0016020,GO:0009653,GO:0009664	extracellular region|membrane|anatomical structure morphogenesis|plant-type cell wall organization
J2O13_01G000594	1171.21	1654.82	687.608	0.415627	-1.26664	1.73E-05	9.70E-05	Down	8.6865	6.29661	10.7755	19.1926	18.1396	13.0246	CDF3	Cyclic dof factor 3			GO:0005634,GO:0003677,GO:0003700,GO:0046872,GO:0009908,GO:0006355	nucleus|DNA binding|DNA-binding transcription factor activity|metal ion binding|flower development|regulation of DNA-templated transcription
J2O13_01G000595	677.153	258.014	1096.29	4.24511	2.0858	1.34E-11	2.13E-10	Up	49.3858	39.3822	58.9685	6.00375	9.33247	13.7183
J2O13_01G000602	985.545	456.655	1514.43	3.31541	1.72919	0.00653974	0.0186716	Up	40.2894	12.1052	26.5179	3.29279	3.22955	13.8644	RNS3	Ribonuclease 3			GO:0005576,GO:0004521,GO:0033897,GO:0003723,GO:0006401	extracellular region|endoribonuclease activity|ribonuclease T2 activity|RNA binding|RNA catabolic process
J2O13_01G000605	194.69	57.6982	331.682	5.73344	2.5194	5.76E-07	4.35E-06	Up	2.11362	4.54925	2.79825	0.242196	0.364028	0.789869	AVT1I	Amino acid transporter AVT1I	ko04727,ko04723,ko04721,ko05032,ko05033	GABAergic synapse|Retrograde endocannabinoid signaling|Synaptic vesicle cycle|Morphine addiction|Nicotine addiction	GO:0016020,GO:0000325,GO:0015171,GO:0003333	membrane|plant-type vacuole|amino acid transmembrane transporter activity|amino acid transmembrane transport
J2O13_01G000610	56.947	32.1258	81.7682	2.54352	1.34683	0.000120623	0.000560712	Up	8.01223	7.96968	7.35154	2.74209	1.70222	3.15625
J2O13_01G000611	232.883	91.0203	374.746	4.10532	2.0375	1.90E-12	3.42E-11	Up	11.6778	11.257	10.0132	1.59068	1.85989	3.25848	ZHD11	Zinc-finger homeodomain protein 11			GO:0005634,GO:0003677,GO:0003700,GO:0046872,GO:0042803,GO:0000976,GO:0045893,GO:0006355,GO:0009414	nucleus|DNA binding|DNA-binding transcription factor activity|metal ion binding|protein homodimerization activity|transcription cis-regulatory region binding|positive regulation of DNA-templated transcription|regulation of DNA-templated transcription|response to water deprivation
J2O13_01G000618	1691.85	2596.49	787.21	0.303112	-1.72208	1.37E-36	2.46E-34	Down	10.9205	11.7513	10.0129	29.0988	26.07	33.9823
J2O13_01G000625	16.6964	28.7642	4.62854	0.159877	-2.64496	0.0015065	0.00524024	Down	0.179787	0.129258	0.0494594	0.4395	0.358401	1.0965
J2O13_01G000637	98.718	30.448	166.988	5.46958	2.45143	0.0184389	0.0453997	Up	5.31012	1.78924	4.45454	0.116995	0.0935358	1.64068	HVA22C	HVA22-like protein c			GO:0016020,GO:0009506,GO:0042538,GO:0009737,GO:0009414	membrane|plasmodesma|hyperosmotic salinity response|response to abscisic acid|response to water deprivation
J2O13_01G000642	3561.39	5564.95	1557.83	0.279934	-1.83684	9.86E-05	0.000466915	Down	56.7528	125.651	57.5928	264.969	303.012	126.758
J2O13_01G000648	472.966	313.801	632.132	2.01565	1.01125	0.0013566	0.00478137	Up	20.9801	12.1322	15.1748	7.7886	6.5408	5.19274	PRE6	Transcription factor PRE6			GO:0005737,GO:0005634,GO:0046983,GO:0006355,GO:0040008,GO:0009416	cytoplasm|nucleus|protein dimerization activity|regulation of DNA-templated transcription|regulation of growth|response to light stimulus
J2O13_01G000654	44.4894	17.6305	71.3483	4.02064	2.00742	0.000141492	0.00064609	Up	0.680071	0.440043	0.63142	0.0761966	0.0797472	0.210094	MYB88	Transcription factor MYB88			GO:0005634,GO:0003700,GO:0000981,GO:0000978,GO:0043565,GO:0009553,GO:0010052,GO:0010235,GO:0010444,GO:0048527,GO:0009554,GO:0050891,GO:1901333,GO:1901002,GO:1902584,GO:1902806,GO:0032875,GO:0006355,GO:2000037,GO:0009737,GO:0009629,GO:0010376	nucleus|DNA-binding transcription factor activity|DNA-binding transcription factor activity, RNA polymerase II-specific|RNA polymerase II cis-regulatory region sequence-specific DNA binding|sequence-specific DNA binding|embryo sac development|guard cell differentiation|guard mother cell cytokinesis|guard mother cell differentiation|lateral root development|megasporogenesis|multicellular organisma…
J2O13_01G000656	1618.18	997.848	2238.51	2.24448	1.16638	1.06E-22	5.95E-21	Up	19.9761	19.6962	21.7811	7.77448	7.30253	7.40925	PBL3	Probable serine/threonine-protein kinase PBL3			GO:0005737,GO:0005634,GO:0005886,GO:0005524,GO:0106310,GO:0004674,GO:0006952,GO:0006468	cytoplasm|nucleus|plasma membrane|ATP binding|protein serine kinase activity|protein serine/threonine kinase activity|defense response|protein phosphorylation
J2O13_01G000660	21.5018	43.0036	0	0.00419659	-7.89657	1.02E-07	8.91E-07	Down	0	0	0	5.2349	5.51464	1.80767
J2O13_01G000661	10.4117	20.4872	0.336275	0.0171773	-5.86335	0.00018626	0.000824105	Down	0	0.049545	0	1.38981	0.686882	0.370846
J2O13_01G000666	1636.99	2614.98	659.003	0.251944	-1.98883	2.55E-23	1.51E-21	Down	7.76054	9.27071	6.07607	24.6936	23.5477	27.5294	CBSCBS2	SNF1-related protein kinase regulatory subunit gamma-1-like			GO:0005739,GO:0005975	mitochondrion|carbohydrate metabolic process
J2O13_01G000684	671.259	202.149	1140.37	5.63624	2.49473	7.92E-64	7.83E-61	Up	14.156	12.191	14.2522	1.68862	2.02504	2.23232	NPF4.6	Protein NRT1/ PTR FAMILY 4.6			GO:0016020,GO:0005886,GO:0090440,GO:0015293,GO:0022857,GO:0080168,GO:0042128,GO:0010119,GO:0009624,GO:0055085	membrane|plasma membrane|abscisic acid transmembrane transporter activity|symporter activity|transmembrane transporter activity|abscisic acid transport|nitrate assimilation|regulation of stomatal movement|response to nematode|transmembrane transport
J2O13_01G000696	3864.45	5782.97	1945.92	0.336526	-1.57121	5.87E-11	8.47E-10	Down	22.3825	18.1074	32.4453	56.9867	62.3491	58.2337	NPF2.13	Protein NRT1/ PTR FAMILY 2.13			GO:0016020,GO:0005886,GO:0080054,GO:0015293,GO:0022857,GO:0042128,GO:0015706,GO:0055085	membrane|plasma membrane|low-affinity nitrate transmembrane transporter activity|symporter activity|transmembrane transporter activity|nitrate assimilation|nitrate transmembrane transport|transmembrane transport
J2O13_01G000698	4173.55	2752.05	5595.04	2.03291	1.02355	4.51E-28	4.29E-26	Up	76.8703	68.1126	70.0316	27.0332	28.2474	32.0147
J2O13_01G000706	211.53	71.8627	351.197	4.87303	2.28482	7.54E-10	9.25E-09	Up	2.65611	2.05894	1.97565	0.263875	0.273822	0.616448	At1g05670	Pentatricopeptide repeat-containing protein At1g05670, mitochondrial			GO:0005783,GO:0005794,GO:0005739	endoplasmic reticulum|Golgi apparatus|mitochondrion
J2O13_01G000715	1144.79	1557.02	732.568	0.470506	-1.08772	1.26E-13	2.63E-12	Down	11.2283	11.3163	9.82701	19.6884	18.3613	18.4805	SHW1	Protein SHORT HYPOCOTYL IN WHITE LIGHT 1			GO:0031965,GO:0005634,GO:0009738,GO:0009908,GO:0010100,GO:0009958,GO:1901333,GO:0048578,GO:0009787,GO:0031540,GO:0010380,GO:0090227,GO:0009642,GO:0009416	nuclear membrane|nucleus|abscisic acid-activated signaling pathway|flower development|negative regulation of photomorphogenesis|positive gravitropism|positive regulation of lateral root development|positive regulation of long-day photoperiodism, flowering|regulation of abscisic acid-activated signaling pathway|regulation of anthocyanin biosynthetic process|regulation of chlorophyll biosynthetic p…
J2O13_01G000719	162.76	251.576	73.9447	0.294052	-1.76586	8.63E-08	7.61E-07	Down	0.611895	0.8841	0.712696	2.33901	2.2278	1.55317	L6	Disease resistance protein L6			GO:0043531,GO:0050135,GO:0003953,GO:0061809,GO:0006952,GO:0019677,GO:0043068,GO:0007165	ADP binding|NAD(P)+ nucleosidase activity|NAD+ nucleosidase activity|NAD+ nucleotidase, cyclic ADP-ribose generating|defense response|NAD catabolic process|positive regulation of programmed cell death|signal transduction
J2O13_01G000729	1924.06	2785.82	1062.3	0.381357	-1.39079	4.11E-14	9.15E-13	Down	16.8189	18.0989	16.3014	40.2951	37.5471	32.0112	CCB4	Protein COFACTOR ASSEMBLY OF COMPLEX C SUBUNIT B CCB4, chloroplastic			GO:0009507,GO:0009535,GO:0010190	chloroplast|chloroplast thylakoid membrane|cytochrome b6f complex assembly
J2O13_01G000732	971.257	437.743	1504.77	3.43779	1.78148	2.10E-09	2.42E-08	Up	13.2773	6.3629	9.87465	2.40819	2.08199	2.58362	TOR1L4	TORTIFOLIA1-like protein 4			GO:0005874,GO:0008017	microtubule|microtubule binding
J2O13_01G000738	1010.42	1369.71	651.121	0.475413	-1.07275	0.0117236	0.0309472	Down	9.50949	13.6925	8.90492	25.7625	18.9722	9.77639	ARR4	Two-component response regulator ARR4	ko04075	Plant hormone signal transduction	GO:0005737,GO:0005634,GO:0000156,GO:0004674,GO:0007623,GO:0009736,GO:0009793,GO:0046777,GO:0010017,GO:0006355,GO:0009735,GO:0010114	cytoplasm|nucleus|phosphorelay response regulator activity|protein serine/threonine kinase activity|circadian rhythm|cytokinin-activated signaling pathway|embryo development ending in seed dormancy|protein autophosphorylation|red or far-red light signaling pathway|regulation of DNA-templated transcription|response to cytokinin|response to red light
J2O13_01G000740	314.14	458.721	169.559	0.369726	-1.43547	0.000435408	0.00176031	Down	1.465	1.85266	1.501	4.04156	4.55575	1.94172	FH4	Formin-like protein 4			GO:0005886,GO:0051015,GO:0045010	plasma membrane|actin filament binding|actin nucleation
J2O13_01G000746	26.7017	42.8716	10.5317	0.246865	-2.01821	0.00616361	0.0177571	Down	0.156041	0.15706	0.691123	1.06806	1.02468	1.25397
J2O13_01G000748	91.5856	43.3916	139.78	3.20782	1.6816	3.68E-06	2.37E-05	Up	0.826275	0.759871	0.932944	0.137322	0.190298	0.328421	COR2	Non-functional NADPH-dependent codeinone reductase 2			GO:0005829,GO:0016616	cytosol|oxidoreductase activity, acting on the CH-OH group of donors, NAD or NADP as acceptor
J2O13_01G000750	103.031	192.902	13.1603	0.0684325	-3.86917	4.76E-07	3.65E-06	Down	0.0641502	0.258277	0.535314	4.28115	4.19502	1.5752	JGB	Protein JINGUBANG			GO:0005737,GO:0005634,GO:0009846	cytoplasm|nucleus|pollen germination
J2O13_01G000755	1444.03	537.249	2350.81	4.37788	2.13023	4.70E-31	5.81E-29	Up	22.0724	19.9323	25.1148	4.13311	4.67634	3.73635	ILL1	IAA-amino acid hydrolase ILR1-like 1			GO:0005788,GO:0016787,GO:0009850	endoplasmic reticulum lumen|hydrolase activity|auxin metabolic process
J2O13_01G000759	1129.91	42.0535	2217.76	52.7032	5.71982	6.52E-25	4.52E-23	Up	41.1495	31.0871	32.1937	0.172976	1.034	0.416583	UGT74B1	UDP-glycosyltransferase 74B1	ko00380,ko00966	Tryptophan metabolism|Glucosinolate biosynthesis	GO:0005829,GO:0005634,GO:0080043,GO:0080044,GO:0047251,GO:0102659,GO:0103100,GO:0103103,GO:0103099,GO:0103101,GO:0103102,GO:0052544,GO:0042742,GO:0019761	cytosol|nucleus|quercetin 3-O-glucosyltransferase activity|quercetin 7-O-glucosyltransferase activity|thiohydroximate beta-D-glucosyltransferase activity|UDP-glucose: 4-methylthiobutylhydroximate S-glucosyltransferase activity|UDP-glucose: 6-methylthiohexylhydroximate S-glucosyltransferase activity|UDP-glucose: 9-methylthiononylhydroximate S-glucosyltransferase activity|UDP-glucose:5-methylthiope…
J2O13_01G000764	32.3149	1.99005	62.6398	31.3886	4.97217	0.00108731	0.00395111	Up	5.7481	0.193932	0.123677	0.0549502	0.0263591	0.0806435	At1g52590	DCC family protein At1g52590, chloroplastic			GO:0010287,GO:0015035	plastoglobule|protein-disulfide reductase activity
J2O13_01G000780	55767.3	1161.4	110373	95.0458	6.57055	1.91E-37	3.62E-35	Up	4425.67	2206.7	5042.25	40.5113	44.3527	13.4936
J2O13_01G000783	557.364	370.386	744.342	2.01007	1.00724	3.05E-11	4.60E-10	Up	8.1984	8.12514	7.32781	3.00878	3.48112	3.18979	RPM1	Disease resistance protein RPM1	ko04626	Plant-pathogen interaction	GO:0012505,GO:0031234,GO:0005886,GO:0043531,GO:0005524,GO:0000166,GO:0009626	endomembrane system|extrinsic component of cytoplasmic side of plasma membrane|plasma membrane|ADP binding|ATP binding|nucleotide binding|plant-type hypersensitive response
J2O13_01G000790	562.522	372.634	752.409	2.01806	1.01297	0.00159383	0.00550959	Up	88.6813	69.528	75.7017	27.1359	20.7259	49.3182	PAR2	Transcription factor PAR2			GO:0005634,GO:0009742,GO:0007623,GO:0032502,GO:0006355,GO:0009641	nucleus|brassinosteroid mediated signaling pathway|circadian rhythm|developmental process|regulation of DNA-templated transcription|shade avoidance
J2O13_01G000793	1901.69	1233.07	2570.3	2.08455	1.05973	1.99E-11	3.07E-10	Up	42.2483	33.2832	44.7347	14.1923	16.5923	16.7143
J2O13_01G000795	2441.79	1116.53	3767.05	3.37434	1.75461	3.60E-10	4.64E-09	Up	34.3907	28.088	22.0468	6.91968	8.19168	5.34776	TPS9	Probable alpha,alpha-trehalose-phosphate synthase [UDP-forming] 9	ko00500	Starch and sucrose metabolism	GO:0016757,GO:0005992,GO:0070413	glycosyltransferase activity|trehalose biosynthetic process|trehalose metabolism in response to stress
J2O13_01G000812	229.932	38.8593	421.004	10.8487	3.43945	8.95E-06	5.35E-05	Up	24.501	12.2269	15.7801	1.12742	2.53506	0.206821		Proteinase inhibitor OS=Linum usitatissimum OX=4006 PE=1 SV=1			GO:0004867,GO:0010466,GO:0009611	serine-type endopeptidase inhibitor activity|negative regulation of peptidase activity|response to wounding
J2O13_01G000825	81.7747	45.7649	117.785	2.57836	1.36645	1.63E-06	1.13E-05	Up	1.80638	1.48484	2.08713	0.566694	0.580745	0.567045	GAT1	GABA transporter 1			GO:0016020,GO:0005886,GO:0015171,GO:0015185,GO:0003333,GO:0015812	membrane|plasma membrane|amino acid transmembrane transporter activity|gamma-aminobutyric acid transmembrane transporter activity|amino acid transmembrane transport|gamma-aminobutyric acid transport
J2O13_01G000832	1484.89	171.872	2797.9	16.2776	4.02481	2.76E-27	2.43E-25	Up	38.5571	27.338	40.6293	1.09535	2.73016	1.53396	DALL3	Phospholipase A1-Igamma2, chloroplastic			GO:0009507,GO:0047714,GO:0008970,GO:0004620,GO:0004806,GO:0016042	chloroplast|galactolipase activity|phospholipase A1 activity|phospholipase activity|triglyceride lipase activity|lipid catabolic process
J2O13_01G000848	125.314	178.774	71.8546	0.401408	-1.31686	0.000436434	0.00176391	Down	0.973263	0.656445	0.55067	1.25337	1.14481	2.14178	D27	Beta-carotene isomerase D27, chloroplastic	ko00906	Carotenoid biosynthesis	GO:0009507,GO:0106365,GO:0005506	chloroplast|beta-carotene isomerase activity|iron ion binding
J2O13_01G000850	591.358	834.453	348.263	0.417361	-1.26063	0.00249239	0.00809801	Down	3.62792	6.95611	3.93144	10.1029	12.2288	5.92375	EML1	Protein EMSY-LIKE 1			GO:0005634,GO:0003682,GO:0050832,GO:0010228	nucleus|chromatin binding|defense response to fungus|vegetative to reproductive phase transition of meristem
J2O13_01G000860	8924.48	12841	5007.94	0.390013	-1.35841	1.22E-29	1.33E-27	Down	44.5902	41.0194	44.0362	92.9723	92.2542	87.5003		2-methyl-6-phytyl-1,4-hydroquinone methyltransferase, chloroplastic OS=Spinacia oleracea OX=3562 PE=1 SV=1	ko00130	Ubiquinone and other terpenoid-quinone biosynthesis	GO:0009706,GO:0102550,GO:0051741,GO:0051742,GO:0032259,GO:0010189	chloroplast inner membrane|2-methyl-6-geranylgeranyl-1,4-benzoquinol methyltransferase activity|2-methyl-6-phytyl-1,4-benzoquinone methyltransferase activity|2-methyl-6-solanyl-1,4-benzoquinone methyltransferase activity|methylation|vitamin E biosynthetic process
J2O13_01G000862	58.4087	25.8089	91.0085	3.52466	1.81748	0.00367717	0.0113659	Up	3.99494	2.65957	1.99898	0.322965	1.18775	0.500307	CML8	Calmodulin-like protein 8	ko04626	Plant-pathogen interaction	GO:0005509,GO:0019722,GO:0005513,GO:0009617	calcium ion binding|calcium-mediated signaling|detection of calcium ion|response to bacterium
J2O13_01G000864	133.105	24.2564	241.954	9.95617	3.31559	3.24E-11	4.85E-10	Up	3.21586	1.47206	1.39217	0.163524	0.109135	0.236506	ACA12	Calcium-transporting ATPase 12, plasma membrane-type			GO:0043231,GO:0005886,GO:0005524,GO:0016887,GO:0019829,GO:0005516,GO:0046872,GO:0005388	intracellular membrane-bounded organelle|plasma membrane|ATP binding|ATP hydrolysis activity|ATPase-coupled cation transmembrane transporter activity|calmodulin binding|metal ion binding|P-type calcium transporter activity
J2O13_01G000872	1029.95	1669.92	389.976	0.233502	-2.0985	2.37E-18	8.86E-17	Down	2.27559	3.68368	2.58879	10.5596	9.88677	9.62154	HSFA2C	Heat stress transcription factor A-2c			GO:0005737,GO:0005634,GO:0003700,GO:0042802,GO:0000978,GO:0034605,GO:0006357	cytoplasm|nucleus|DNA-binding transcription factor activity|identical protein binding|RNA polymerase II cis-regulatory region sequence-specific DNA binding|cellular response to heat|regulation of transcription by RNA polymerase II
J2O13_01G000873	22.0942	33.6013	10.5872	0.314069	-1.67085	0.0113049	0.0299998	Down	0.373777	1.02116	0.308478	1.55332	1.31491	1.60914
J2O13_01G000877	217.038	81.9481	352.128	4.29214	2.1017	0.0160897	0.0404982	Up	4.44651	1.3091	6.16511	0.256798	0.237242	1.90761
J2O13_01G000878	63210.9	5388.1	121034	22.4635	4.48951	3.00E-15	7.76E-14	Up	1397.59	468.143	1441.09	40.2926	60.88	16.9229	CLH1	Chlorophyllase-1	ko00860	Porphyrin metabolism	GO:0005829,GO:0005634,GO:0000325,GO:0047746,GO:0102293,GO:0015996,GO:0042742,GO:0050832	cytosol|nucleus|plant-type vacuole|chlorophyllase activity|pheophytinase b activity|chlorophyll catabolic process|defense response to bacterium|defense response to fungus
J2O13_01G000879	34.9851	1.93724	68.0329	34.2472	5.09791	8.01E-10	9.77E-09	Up	2.61442	1.40346	3.18858	0.0298252	0.0286137	0.116722	CHLASE1	Chlorophyllase-1, chloroplastic	ko00860	Porphyrin metabolism	GO:0009507,GO:0047746,GO:0102293,GO:0015996	chloroplast|chlorophyllase activity|pheophytinase b activity|chlorophyll catabolic process
J2O13_01G000885	2969.86	4245.1	1694.62	0.399219	-1.32475	0.000510793	0.0020215	Down	11.7087	18.8383	20.3079	41.6721	40.7756	20.4478	SULTR31	Sulfate transporter 3.1			GO:0009507,GO:0005886,GO:0008271,GO:0015116,GO:0015293,GO:0008272	chloroplast|plasma membrane|secondary active sulfate transmembrane transporter activity|sulfate transmembrane transporter activity|symporter activity|sulfate transport
J2O13_01G000905	3624.34	1800.01	5448.66	3.02634	1.59757	1.65E-13	3.38E-12	Up	76.2669	80.1736	76.3682	16.1655	18.3002	29.8013	FLZ8	FCS-Like Zinc finger 8			GO:0046872,GO:0071456,GO:0009749,GO:0042594,GO:0009744	metal ion binding|cellular response to hypoxia|response to glucose|response to starvation|response to sucrose
J2O13_01G000906	1859.25	968.574	2749.93	2.83811	1.50493	7.54E-31	9.14E-29	Up	67.4568	69.0564	67.5459	18.3231	17.1162	24.142
J2O13_01G000909	1635.32	693.307	2577.34	3.71868	1.89479	1.37E-10	1.86E-09	Up	29.7204	26.4151	31.4779	6.77457	8.03679	4.30922	GID1B	Gibberellin receptor GID1B	ko04075	Plant hormone signal transduction	GO:0005737,GO:0005634,GO:0010331,GO:0016787,GO:0048444,GO:0048530,GO:0010476,GO:0010629,GO:1905516,GO:0009939,GO:0010325,GO:0009739	cytoplasm|nucleus|gibberellin binding|hydrolase activity|floral organ morphogenesis|fruit morphogenesis|gibberellin mediated signaling pathway|negative regulation of gene expression|positive regulation of fertilization|positive regulation of gibberellic acid mediated signaling pathway|raffinose family oligosaccharide biosynthetic process|response to gibberellin
J2O13_01G000915	924.831	1342.49	507.171	0.377759	-1.40446	6.45E-09	6.93E-08	Down	9.60622	15.257	10.4693	27.4362	24.5443	24.8761	SRF7	Protein STRUBBELIG-RECEPTOR FAMILY 7			GO:0005886,GO:0005524,GO:0004672,GO:0006468	plasma membrane|ATP binding|protein kinase activity|protein phosphorylation
J2O13_01G000923	1142.28	557.961	1726.6	3.09375	1.62936	0.0198627	0.048289	Up	2.82718	8.56632	7.71978	0.65317	0.758563	3.92298	LAC9	Putative laccase-9			GO:0048046,GO:0005507,GO:0052716,GO:0016491,GO:0046274	apoplast|copper ion binding|hydroquinone:oxygen oxidoreductase activity|oxidoreductase activity|lignin catabolic process
J2O13_01G000927	4098.3	5975.98	2220.61	0.371603	-1.42817	7.49E-08	6.69E-07	Down	29.8379	36.7591	31.9184	82.1045	81.1394	52.3836	RPH1	Protein RESISTANCE TO PHYTOPHTHORA 1, chloroplastic			GO:0009507,GO:0016020,GO:0006952,GO:0050665,GO:1902290	chloroplast|membrane|defense response|hydrogen peroxide biosynthetic process|positive regulation of defense response to oomycetes
J2O13_01G000941	10647.5	16357.9	4937.01	0.301815	-1.72827	7.88E-08	7.00E-07	Down	44.3001	63.851	51.2304	166.041	169.156	93.1689
J2O13_01G000948	123.801	43.47	204.133	4.69018	2.22964	3.29E-05	0.000173029	Up	0.752998	2.20897	1.00388	0.22026	0.153202	0.334023	At4g02900	CSC1-like protein At4g02900			GO:0005886,GO:0005227	plasma membrane|calcium activated cation channel activity
J2O13_01G000959	52.1278	102.266	1.98947	0.0192733	-5.69725	6.12E-12	1.02E-10	Down	0.0198801	0.0800398	0.0191416	2.34729	1.56657	1.06507	IPT3	Adenylate isopentenyltransferase 3, chloroplastic	ko00908	Zeatin biosynthesis	GO:0009507,GO:0005739,GO:0031965,GO:0005634,GO:0009536,GO:0052623,GO:0009824,GO:0005524,GO:0052622,GO:0052381,GO:0009691,GO:0006400	chloroplast|mitochondrion|nuclear membrane|nucleus|plastid|ADP dimethylallyltransferase activity|AMP dimethylallyltransferase activity|ATP binding|ATP dimethylallyltransferase activity|tRNA dimethylallyltransferase activity|cytokinin biosynthetic process|tRNA modification
J2O13_01G000978	9207.39	13032	5382.77	0.413048	-1.27562	9.09E-10	1.10E-08	Down	38.0042	43.388	36.1684	85.3349	82.7692	64.3878	FZL	Probable transmembrane GTPase FZO-like, chloroplastic			GO:0009507,GO:0009706,GO:0031969,GO:0009707,GO:0009535,GO:0005525,GO:0016787,GO:1900425,GO:0034051,GO:0010027,GO:0010228	chloroplast|chloroplast inner membrane|chloroplast membrane|chloroplast outer membrane|chloroplast thylakoid membrane|GTP binding|hydrolase activity|negative regulation of defense response to bacterium|negative regulation of plant-type hypersensitive response|thylakoid membrane organization|vegetative to reproductive phase transition of meristem
J2O13_01G000983	263.426	359.97	166.882	0.463627	-1.10896	0.000548858	0.00215396	Down	3.0558	2.13888	3.7032	4.68811	3.92106	7.36529
J2O13_01G000984	26367.9	38730	14005.8	0.361623	-1.46744	2.12E-12	3.80E-11	Down	126.53	150.961	95.9785	289.582	270.708	290.952	CSP41A	Chloroplast stem-loop binding protein of 41 kDa a, chloroplastic			GO:0048046,GO:0009507,GO:0009941,GO:0009570,GO:0009534,GO:0005829,GO:0010287,GO:0005840,GO:0010319,GO:0009579,GO:0003729,GO:0008266,GO:0003723,GO:0019843,GO:0009658,GO:0007623,GO:0032544,GO:0045893,GO:0045727,GO:0006364	apoplast|chloroplast|chloroplast envelope|chloroplast stroma|chloroplast thylakoid|cytosol|plastoglobule|ribosome|stromule|thylakoid|mRNA binding|poly(U) RNA binding|RNA binding|rRNA binding|chloroplast organization|circadian rhythm|plastid translation|positive regulation of DNA-templated transcription|positive regulation of translation|rRNA processing
J2O13_01G000996	382.163	144.163	620.163	4.30318	2.1054	0.00402093	0.0122603	Up	8.41451	5.28051	3.76833	0.837141	2.17229	0.249614	TPS28	(-)-kolavenyl diphosphate synthase TPS28, chloroplastic	ko00904	Diterpenoid biosynthesis	GO:0009507,GO:0016853,GO:0000287,GO:0010333	chloroplast|isomerase activity|magnesium ion binding|terpene synthase activity
J2O13_01G001009	78.2643	124.843	31.6856	0.253517	-1.97985	0.000146546	0.000665414	Down	1.91724	0.964882	1.3006	2.79611	3.36211	7.76929	OFP16	Transcription repressor OFP16			GO:0005634,GO:0045892	nucleus|negative regulation of DNA-templated transcription
J2O13_01G001021	1660.99	2226.62	1095.37	0.491887	-1.0236	3.13E-09	3.52E-08	Down	10.981	14.8845	12.5005	20.5825	18.8157	25.1551	ROPGAP2	Rho GTPase-activating protein 2			GO:0005096,GO:0007165	GTPase activator activity|signal transduction
J2O13_01G001022	27.696	12.075	43.317	3.55965	1.83173	0.00292458	0.00929117	Up	1.07087	1.95976	1.21856	0.194353	0.239732	0.570454
J2O13_01G001039	936.899	1419.37	454.43	0.320257	-1.6427	4.08E-20	1.81E-18	Down	5.9641	7.19162	7.42643	17.9175	18.613	16.1163	NET3C	Protein NETWORKED 3C			GO:0005789,GO:0005886,GO:0005774,GO:0003779	endoplasmic reticulum membrane|plasma membrane|vacuolar membrane|actin binding
J2O13_01G001046	177.717	75.8396	279.594	3.69219	1.88448	0.00216864	0.00719367	Up	57.4996	46.8693	55.3634	15.4847	15.939	3.15625
J2O13_01G001047	300.718	174.148	427.288	2.45486	1.29564	0.00617919	0.0177963	Up	97.1876	73.9962	77.8264	24.699	43.7581	13.5324
J2O13_01G001051	4072.74	6930.25	1215.24	0.175351	-2.51168	1.00E-05	5.94E-05	Down	15.378	88.4599	45.1234	257.836	259.486	175.975	GRXS9	Monothiol glutaredoxin-S9			GO:0005737,GO:0005634,GO:0051537,GO:0046872	cytoplasm|nucleus|2 iron, 2 sulfur cluster binding|metal ion binding
J2O13_01G001053	97.5043	11.9838	183.025	15.3569	3.94081	6.03E-05	0.000299515	Up	11.0001	14.8645	7.72413	1.03996	0.6984	0	GRXC11	Glutaredoxin-C11			GO:0005737,GO:0000122,GO:0010167	cytoplasm|negative regulation of transcription by RNA polymerase II|response to nitrate
J2O13_01G001058	23.2924	1.97413	44.6107	22.3423	4.4817	4.09E-06	2.61E-05	Up	4.30492	5.6871	2.07249	0	0.294471	0.150152	GRXS1	Monothiol glutaredoxin-S1			GO:0005737,GO:0051537,GO:0046872,GO:0010167	cytoplasm|2 iron, 2 sulfur cluster binding|metal ion binding|response to nitrate
J2O13_01G001061	3987.82	5770.83	2204.81	0.382075	-1.38807	1.34E-17	4.63E-16	Down	28.2168	34.487	30.7263	69.708	68.7607	61.9914	APG3	Peptide chain release factor APG3, chloroplastic			GO:0009507,GO:0003747,GO:0016149,GO:0009658,GO:0032544,GO:0010027,GO:0006415	chloroplast|translation release factor activity|translation release factor activity, codon specific|chloroplast organization|plastid translation|thylakoid membrane organization|translational termination
J2O13_01G001063	187.656	251.474	123.838	0.491881	-1.02362	0.000149188	0.000676031	Down	2.63284	3.63237	2.22908	4.1169	4.6949	5.49087	MTERF15	Transcription termination factor MTERF15, mitochondrial			GO:0009507,GO:0005739,GO:0003690,GO:0003723,GO:0009658,GO:0032502,GO:0006353,GO:0006355,GO:0000394	chloroplast|mitochondrion|double-stranded DNA binding|RNA binding|chloroplast organization|developmental process|DNA-templated transcription termination|regulation of DNA-templated transcription|RNA splicing, via endonucleolytic cleavage and ligation
J2O13_01G001070	9.75226	2.07974	17.4248	8.49355	3.08637	0.00530849	0.0155937	Up	0.354385	0.228287	0.163785	0.0242568	0.046543	0	GAF1	Zinc finger protein GAI-ASSOCIATED FACTOR 1			GO:0005634,GO:0003677,GO:0003700,GO:0046872,GO:0010336,GO:0009740,GO:0006355,GO:0009937	nucleus|DNA binding|DNA-binding transcription factor activity|metal ion binding|gibberellic acid homeostasis|gibberellic acid mediated signaling pathway|regulation of DNA-templated transcription|regulation of gibberellic acid mediated signaling pathway
J2O13_01G001074	178.493	278.705	78.2806	0.280709	-1.83285	8.41E-07	6.14E-06	Down	1.53666	0.760014	0.841827	2.86754	2.41397	4.01426	WEE1	Wee1-like protein kinase	ko04110,ko05170	Cell cycle|Human immunodeficiency virus 1 infection	GO:0005634,GO:0005524,GO:0046872,GO:0004715,GO:0004672,GO:0004713,GO:0007049,GO:0051301,GO:0000076,GO:1902750	nucleus|ATP binding|metal ion binding|non-membrane spanning protein tyrosine kinase activity|protein kinase activity|protein tyrosine kinase activity|cell cycle|cell division|DNA replication checkpoint signaling|negative regulation of cell cycle G2/M phase transition
J2O13_01G001082	335.989	487.896	184.082	0.377589	-1.40511	6.16E-15	1.53E-13	Down	2.74936	3.10686	3.5567	7.15804	6.11964	7.24334	HIPP36	Heavy metal-associated isoprenylated plant protein 36			GO:0046872	metal ion binding
J2O13_01G001089	25.1495	6.97195	43.3271	6.24959	2.64376	0.0137671	0.035469	Up	0.587462	2.44232	0.295115	0.240388	0.146761	0.0427621	TSPO	Translocator protein homolog	ko04080,ko04214,ko04979,ko05166	Neuroactive ligand-receptor interaction|Apoptosis - fly|Cholesterol metabolism|Human T-cell leukemia virus 1 infection	GO:0031969,GO:0005783,GO:0005789,GO:0005794,GO:0000139,GO:0005795,GO:0016020,GO:0020037,GO:0006778,GO:0009737,GO:0006970,GO:0009651	chloroplast membrane|endoplasmic reticulum|endoplasmic reticulum membrane|Golgi apparatus|Golgi membrane|Golgi stack|membrane|heme binding|porphyrin-containing compound metabolic process|response to abscisic acid|response to osmotic stress|response to salt stress
J2O13_01G001098	8.6376	1.99704	15.2782	7.62079	2.92994	0.00147076	0.00513701	Up	1.05573	1.32828	1.69418	0.0752731	0.216647	0.147292
J2O13_01G001104	37.0791	17.0608	57.0973	3.35716	1.74724	0.00609155	0.0175837	Up	1.37153	0.933856	1.18463	0.241597	0.480123	0.118187	OsI_27296	Probable E3 ubiquitin-protein ligase BAH1-like 1			GO:0046872,GO:0016740,GO:0016567	metal ion binding|transferase activity|protein ubiquitination
J2O13_01G001109	2698.43	3764.08	1632.78	0.433768	-1.205	3.28E-06	2.14E-05	Down	18.5151	33.154	22.054	46.5277	47.8613	45.3845	BGLU11	Beta-glucosidase 11			GO:0008422,GO:0102483,GO:0005975	beta-glucosidase activity|scopolin beta-glucosidase activity|carbohydrate metabolic process
J2O13_01G001119	904.46	263.724	1545.2	5.85617	2.54996	0.000720373	0.00274658	Up	42.6424	112.749	62.4408	2.87406	4.32746	25.1902	PMEI6	Pectinesterase inhibitor 6			GO:0048046,GO:0004857,GO:0046910,GO:0043086,GO:0009827,GO:0010214	apoplast|enzyme inhibitor activity|pectinesterase inhibitor activity|negative regulation of catalytic activity|plant-type cell wall modification|seed coat development
J2O13_01G001137	299.279	190.816	407.742	2.13418	1.09368	5.27E-05	0.000264994	Up	11.8365	9.97134	9.9598	2.68593	4.47777	5.21265	At5g01610	Uncharacterized protein At5g01610
J2O13_01G001144	39.9919	12.2696	67.7143	5.4921	2.45736	0.00778002	0.0217082	Up	1.73901	0.364077	0.750134	0.0238062	0.159875	0.256208	PME7	Probable pectinesterase/pectinesterase inhibitor 7	ko00040,ko02020	Pentose and glucuronate interconversions|Two-component system	GO:0005576,GO:0045330,GO:0030599,GO:0046910,GO:0042545,GO:0045490	extracellular region|aspartyl esterase activity|pectinesterase activity|pectinesterase inhibitor activity|cell wall modification|pectin catabolic process
J2O13_01G001146	842.046	169.952	1514.14	8.90234	3.15418	2.61E-05	0.000140341	Up	23.0508	14.6397	21.9444	0.688886	0.469029	4.66361	At4g02290	Endoglucanase 17	ko00500,ko02020	Starch and sucrose metabolism|Two-component system	GO:0005576,GO:0008810,GO:0071555,GO:0030245	extracellular region|cellulase activity|cell wall organization|cellulose catabolic process
J2O13_01G001147	7205.86	3214.34	11197.4	3.4837	1.80062	5.59E-17	1.76E-15	Up	95.1338	104.802	69.2817	21.2337	22.2974	19.9824	SUS2	Sucrose synthase 2	ko00500	Starch and sucrose metabolism	GO:0016157,GO:0005985	sucrose synthase activity|sucrose metabolic process
J2O13_01G001148	658.484	336.051	980.916	2.92014	1.54604	6.13E-05	0.000303745	Up	6.06568	13.0321	8.41222	3.071	2.76355	1.83227	PGA3	Exopolygalacturonase clone GBGE184	ko00040	Pentose and glucuronate interconversions	GO:0005576,GO:0047911,GO:0004650,GO:0005975,GO:0071555	extracellular region|galacturan 1,4-alpha-galacturonidase activity|polygalacturonase activity|carbohydrate metabolic process|cell wall organization
J2O13_01G001150	9696.59	14071.6	5321.62	0.378188	-1.40282	5.92E-06	3.66E-05	Down	28.6737	32.3267	28.464	79.0399	71.5396	41.0924	RSH1	Putative GTP diphosphokinase RSH1, chloroplastic	ko00230	Purine metabolism	GO:0009507,GO:0005524,GO:0005525,GO:0008728,GO:0016301,GO:0015969,GO:0016310	chloroplast|ATP binding|GTP binding|GTP diphosphokinase activity|kinase activity|guanosine tetraphosphate metabolic process|phosphorylation
J2O13_01G001158	112.431	222.613	2.25041	0.0101864	-6.61721	2.32E-11	3.54E-10	Down	0.0580983	0.0292389	0.11188	6.73552	7.86877	0.996999	EXL2	Protein EXORDIUM-like 2			GO:0048046,GO:0005615,GO:0005794,GO:0009505,GO:0009506,GO:0009536,GO:0071456	apoplast|extracellular space|Golgi apparatus|plant-type cell wall|plasmodesma|plastid|cellular response to hypoxia
J2O13_01G001160	310.743	614.431	7.0541	0.0115944	-6.43043	7.08E-36	1.19E-33	Down	0.08571	0.143783	0.385121	16.4266	16.0173	10.81	JJJ1	DNAJ protein JJJ1 homolog			GO:0005634,GO:0003676,GO:0008270,GO:0010468	nucleus|nucleic acid binding|zinc ion binding|regulation of gene expression
J2O13_01G001169	257.932	98.1555	417.708	4.25116	2.08786	0.0199243	0.048386	Up	4.02614	1.26853	3.34526	0.128231	0.162165	1.48269	CSLD5	Cellulose synthase-like protein D5	ko00520	Amino sugar and nucleotide sugar metabolism	GO:0005794,GO:0000139,GO:0005886,GO:0016760,GO:0046527,GO:0051753,GO:0000919,GO:0042546,GO:0071555,GO:0030244,GO:0009833,GO:0006970,GO:0009651,GO:0009414,GO:0048367	Golgi apparatus|Golgi membrane|plasma membrane|cellulose synthase (UDP-forming) activity|glucosyltransferase activity|mannan synthase activity|cell plate assembly|cell wall biogenesis|cell wall organization|cellulose biosynthetic process|plant-type primary cell wall biogenesis|response to osmotic stress|response to salt stress|response to water deprivation|shoot system development
J2O13_01G001170	1629.4	2226	1032.79	0.464008	-1.10778	4.00E-16	1.13E-14	Down	14.6065	16.654	16.1355	29.5318	24.6384	29.9589	GATL7	Probable galacturonosyltransferase-like 7			GO:0005794,GO:0000139,GO:0047262,GO:0071555,GO:0045489	Golgi apparatus|Golgi membrane|polygalacturonate 4-alpha-galacturonosyltransferase activity|cell wall organization|pectin biosynthetic process
J2O13_01G001175	13.6779	2.67501	24.6807	9.2033	3.20215	0.000344568	0.00143172	Up	0.79293	1.43659	0.725299	0.0339213	0.162717	0.0663761
J2O13_01G001180	293.132	423.347	162.917	0.384646	-1.3784	0.000237178	0.0010205	Down	12.7675	11.7169	12.5824	19.9198	17.0147	44.2594	GATA15	GATA transcription factor 15			GO:0005634,GO:0003700,GO:0000976,GO:0008270	nucleus|DNA-binding transcription factor activity|transcription cis-regulatory region binding|zinc ion binding
J2O13_01G001217	1714.16	958.089	2470.23	2.57904	1.36683	1.60E-23	9.62E-22	Up	140.293	116.904	147.357	42.5227	42.8796	43.5028	BZIP53	bZIP transcription factor 53			GO:0005634,GO:0003700,GO:0045735,GO:0046982,GO:0043565,GO:0000976,GO:0009267,GO:0006971,GO:0045893,GO:2000693	nucleus|DNA-binding transcription factor activity|nutrient reservoir activity|protein heterodimerization activity|sequence-specific DNA binding|transcription cis-regulatory region binding|cellular response to starvation|hypotonic response|positive regulation of DNA-templated transcription|positive regulation of seed maturation
J2O13_01G001218	62983.7	89260.7	36706.6	0.411231	-1.28198	4.16E-05	0.000213451	Down	2339.05	3132.11	2482.79	6086.13	6180.02	3427.14	CP12-2	Calvin cycle protein CP12-2, chloroplastic			GO:0009507,GO:0009570,GO:0005829,GO:0032991,GO:0099080,GO:0005507,GO:0019899,GO:0016151,GO:0044877,GO:0030674,GO:0071454,GO:0070417,GO:0034605,GO:0080153,GO:0018316,GO:0065003,GO:0019253,GO:0009416,GO:0009744	chloroplast|chloroplast stroma|cytosol|protein-containing complex|supramolecular complex|copper ion binding|enzyme binding|nickel cation binding|protein-containing complex binding|protein-macromolecule adaptor activity|cellular response to anoxia|cellular response to cold|cellular response to heat|negative regulation of reductive pentose-phosphate cycle|peptide cross-linking via L-cystine|protein…
J2O13_01G001226	1279.61	831.456	1727.76	2.07906	1.05593	3.33E-25	2.34E-23	Up	19.719	19.5455	21.211	8.09476	7.55735	8.28724	WRKY69	Probable WRKY transcription factor 69			GO:0005634,GO:0003700,GO:0000976	nucleus|DNA-binding transcription factor activity|transcription cis-regulatory region binding
J2O13_01G001240	174.948	57.8391	292.057	5.03289	2.33139	7.29E-25	5.01E-23	Up	2.24185	2.48963	2.58868	0.311428	0.393844	0.498594	STS1	Stachyose synthase	ko00052	Galactose metabolism	GO:0005737,GO:0047268,GO:0009312,GO:0033532	cytoplasm|galactinol-raffinose galactosyltransferase activity|oligosaccharide biosynthetic process|stachyose biosynthetic process
J2O13_01G001243	358.519	38.9723	678.065	17.4132	4.12211	2.54E-61	2.26E-58	Up	10.6404	7.98882	8.71921	0.376004	0.502837	0.412467	WRKY23	WRKY transcription factor 23			GO:0005634,GO:0003700,GO:0000976,GO:1901703,GO:0009733,GO:0009624	nucleus|DNA-binding transcription factor activity|transcription cis-regulatory region binding|protein localization involved in auxin polar transport|response to auxin|response to nematode
J2O13_01G001253	2640.26	3803.26	1477.26	0.388434	-1.36426	5.28E-05	0.000265456	Down	32.9692	42.8716	34.4769	89.1222	93.7262	47.2645	NIFU1	NifU-like protein 1, chloroplastic			GO:0009507,GO:0009570,GO:0005739,GO:0051539,GO:0005506,GO:0005198,GO:0016226,GO:0097428	chloroplast|chloroplast stroma|mitochondrion|4 iron, 4 sulfur cluster binding|iron ion binding|structural molecule activity|iron-sulfur cluster assembly|protein maturation by iron-sulfur cluster transfer
J2O13_01G001261	275.616	96.9656	454.265	4.68647	2.2285	1.31E-26	1.06E-24	Up	11.1239	8.14293	10.3584	1.69364	1.64251	1.87317	MYB78	Transcription factor MYB78			GO:0005634,GO:0003700,GO:0043565,GO:0000976,GO:0006355,GO:0009737,GO:1902074	nucleus|DNA-binding transcription factor activity|sequence-specific DNA binding|transcription cis-regulatory region binding|regulation of DNA-templated transcription|response to abscisic acid|response to salt
J2O13_01G001270	401.445	554.142	248.747	0.449086	-1.15494	0.000838361	0.0031347	Down	2.62889	1.3414	2.92673	4.06898	4.78785	3.68302	BOR1	Boron transporter 1			GO:0010008,GO:0005886,GO:0005774,GO:0046715,GO:0005452,GO:0022857,GO:0035445,GO:0080029,GO:0050801,GO:0010036,GO:0055085	endosome membrane|plasma membrane|vacuolar membrane|active borate transmembrane transporter activity|solute:inorganic anion antiporter activity|transmembrane transporter activity|borate transmembrane transport|cellular response to boron-containing substance levels|ion homeostasis|response to boron-containing substance|transmembrane transport
J2O13_01G001272	2173.83	615.77	3731.88	6.05907	2.5991	0.000409165	0.00166517	Up	277.766	319.737	302.488	8.9257	17.4531	103.06
J2O13_01G001273	164.284	23.248	305.321	13.0623	3.70734	4.04E-07	3.15E-06	Up	19.3765	14.684	18.0601	0.433738	0.323649	2.68763
J2O13_01G001275	1616.19	1058.26	2174.11	2.05515	1.03924	3.66E-15	9.37E-14	Up	29.2316	24.6977	28.7619	11.4367	10.5291	11.0949	ASK1	Shaggy-related protein kinase alpha			GO:0005737,GO:0005524,GO:0004672,GO:0106310,GO:0004674,GO:0042538,GO:0009933,GO:1901002,GO:0006468,GO:0009651,GO:0007165	cytoplasm|ATP binding|protein kinase activity|protein serine kinase activity|protein serine/threonine kinase activity|hyperosmotic salinity response|meristem structural organization|positive regulation of response to salt stress|protein phosphorylation|response to salt stress|signal transduction
J2O13_01G001277	1546.13	2151.54	940.708	0.437265	-1.19342	4.38E-08	4.08E-07	Down	13.6162	17.0588	14.9458	30.0568	31.5709	23.6007
J2O13_01G001281	3295.25	1511.93	5078.58	3.35908	1.74806	1.31E-29	1.42E-27	Up	27.0979	20.4245	21.5179	5.34295	5.63446	5.96027	TRM13	tRNA:m(4)X modification enzyme TRM13			GO:0005737,GO:0005634,GO:0046872,GO:0106050,GO:0008175,GO:0009651,GO:0030488	cytoplasm|nucleus|metal ion binding|tRNA 2'-O-methyltransferase activity|tRNA methyltransferase activity|response to salt stress|tRNA methylation
J2O13_01G001287	11180.8	6213.73	16147.9	2.59864	1.37776	4.95E-07	3.78E-06	Up	214.514	179.734	244.773	51.0055	52.8964	101.979	METK1	S-adenosylmethionine synthase 1	ko00270,ko00999	Cysteine and methionine metabolism|Biosynthesis of various plant secondary metabolites	GO:0005829,GO:0005524,GO:0046872,GO:0004478,GO:0006730,GO:0006556	cytosol|ATP binding|metal ion binding|methionine adenosyltransferase activity|one-carbon metabolic process|S-adenosylmethionine biosynthetic process
J2O13_01G001295	700.28	1006.23	394.326	0.391921	-1.35136	0.000476633	0.00190407	Down	3.76167	7.74994	6.0271	12.8864	15.2577	8.21663	RL3	Protein RADIALIS-like 3			GO:0005634,GO:0003700	nucleus|DNA-binding transcription factor activity
J2O13_01G001310	1110	1503.14	716.856	0.476832	-1.06845	2.11E-13	4.26E-12	Down	6.33546	7.08325	7.17766	11.0359	10.284	14.4653	GSVIVT00026920001	Probable polygalacturonase			GO:0016020,GO:0004650,GO:0005975	membrane|polygalacturonase activity|carbohydrate metabolic process
J2O13_01G001313	13.4977	1.32605	25.6693	19.2259	4.26498	0.000181078	0.000804774	Up	0.892365	0.299397	0.739878	0	0.0610409	0.02075	Cht10	Chitinase 10			GO:0004568,GO:0016998,GO:0006032,GO:0000272	chitinase activity|cell wall macromolecule catabolic process|chitin catabolic process|polysaccharide catabolic process
J2O13_01G001318	2755.8	1683.6	3828	2.27392	1.18518	4.86E-06	3.05E-05	Up	28.59	46.0484	35.7981	13.5888	14.9931	11.1324	PIL15	Transcription factor PHYTOCHROME INTERACTING FACTOR-LIKE 15	ko04075,ko04712	Plant hormone signal transduction|Circadian rhythm - plant	GO:0005634,GO:0003677,GO:0003700,GO:0046983,GO:0090229,GO:0006355	nucleus|DNA binding|DNA-binding transcription factor activity|protein dimerization activity|negative regulation of red or far-red light signaling pathway|regulation of DNA-templated transcription
J2O13_01G001322	22.6109	10.5436	34.6783	3.27353	1.71085	0.00480635	0.014317	Up	1.31042	1.46553	2.33655	0.207627	0.517903	0.568789	SMR6	Cyclin-dependent protein kinase inhibitor SMR6			GO:0005634,GO:0004860,GO:0007049,GO:0045839,GO:0032875	nucleus|protein kinase inhibitor activity|cell cycle|negative regulation of mitotic nuclear division|regulation of DNA endoreduplication
J2O13_01G001327	1627.74	2456.84	798.629	0.325071	-1.62117	0.000114313	0.000534171	Down	11.8139	17.0389	10.5884	42.2772	38.548	17.18			ko00760	Nicotinate and nicotinamide metabolism
J2O13_01G001332	165.253	293.254	37.2524	0.127058	-2.97644	1.49E-06	1.04E-05	Down	0.438495	1.64774	1.21032	8.30386	9.19034	3.42593
J2O13_01G001338	54.7758	25.9195	83.6321	3.21789	1.68612	3.00E-06	1.98E-05	Up	4.11075	3.11481	4.4917	0.750849	1.02366	1.23725	GWD2	Alpha-glucan water dikinase 2			GO:0009941,GO:0005524,GO:0102216,GO:0046872,GO:0102218,GO:0005975,GO:0016310	chloroplast envelope|ATP binding|maltodextrin water dikinase|metal ion binding|starch, H2O dikinase activity|carbohydrate metabolic process|phosphorylation
J2O13_01G001339	123.873	65.2173	182.528	2.79149	1.48104	8.79E-07	6.40E-06	Up	3.01292	2.28195	2.95843	0.561509	0.820296	1.07377	GWD2	Alpha-glucan water dikinase 2			GO:0009941,GO:0005524,GO:0102216,GO:0046872,GO:0102218,GO:0005975,GO:0016310	chloroplast envelope|ATP binding|maltodextrin water dikinase|metal ion binding|starch, H2O dikinase activity|carbohydrate metabolic process|phosphorylation
J2O13_01G001343	215.103	3.35299	426.853	127.242	6.99143	4.45E-10	5.67E-09	Up	2.07458	8.59611	0.399501	0.00739582	0.0496679	0.0144719	MAN4	Mannan endo-1,4-beta-mannosidase 4	ko00051	Fructose and mannose metabolism	GO:0005576,GO:0016985,GO:0071704	extracellular region|mannan endo-1,4-beta-mannosidase activity|organic substance metabolic process
J2O13_01G001347	285.133	125.959	444.306	3.52389	1.81717	2.83E-10	3.70E-09	Up	8.58938	5.56246	7.67732	1.553	1.29038	2.30628	FIP1	GEM-like protein 1			GO:0005634	nucleus
J2O13_01G001348	8278.88	12323.9	4233.9	0.343557	-1.54138	3.87E-09	4.27E-08	Down	18.8795	22.3639	18.5149	54.521	52.3715	34.6337
J2O13_01G001355	3510.76	2124.33	4897.19	2.3049	1.2047	1.59E-14	3.74E-13	Up	33.0499	29.6142	34.5269	10.1467	10.0839	14.7731	PAP29	Probable inactive purple acid phosphatase 29			GO:0005576,GO:0003993,GO:0016788,GO:0046872	extracellular region|acid phosphatase activity|hydrolase activity, acting on ester bonds|metal ion binding
J2O13_01G001358	118.931	8.80669	229.055	26.0318	4.7022	2.56E-05	0.000137784	Up	36.7306	10.6262	29.1187	0.0940913	2.16647	0.0920574
J2O13_01G001370	111.618	216.557	6.67896	0.0307841	-5.02167	0.000593339	0.00231164	Down	0.196545	0.553921	0.0378487	9.41714	10.9384	0.0329056	NTL9	Protein NTM1-like 9			GO:0005789,GO:0005634,GO:0005886,GO:0005516,GO:0003700,GO:0000976,GO:0071470,GO:0045892,GO:1900426,GO:0031347,GO:0006355	endoplasmic reticulum membrane|nucleus|plasma membrane|calmodulin binding|DNA-binding transcription factor activity|transcription cis-regulatory region binding|cellular response to osmotic stress|negative regulation of DNA-templated transcription|positive regulation of defense response to bacterium|regulation of defense response|regulation of DNA-templated transcription
J2O13_01G001371	10.4331	20.8662	0	0.00864419	-6.85405	0.0100637	0.0271613	Down	0	0	0	2.6733	4.12584	0
J2O13_01G001382	5839.67	9727.81	1951.54	0.200616	-2.31749	5.02E-34	7.71E-32	Down	17.4385	11.8688	15.3442	56.4646	53.5514	74.3096	LHY	Protein LATE ELONGATED HYPOCOTYL	ko04712	Circadian rhythm - plant	GO:0005634,GO:0000976,GO:0007623,GO:0010597,GO:0045892,GO:0042752	nucleus|transcription cis-regulatory region binding|circadian rhythm|green leaf volatile biosynthetic process|negative regulation of DNA-templated transcription|regulation of circadian rhythm
J2O13_01G001385	13.1197	0	26.2393	141.447	7.14411	1.54E-05	8.75E-05	Up	0.519942	0.715227	0.1335	0	0	0	DLO1	Protein DMR6-LIKE OXYGENASE 1			GO:0051213,GO:0046872,GO:0002229,GO:0010150,GO:0009617,GO:0009620,GO:0002239,GO:0009751,GO:0046244	dioxygenase activity|metal ion binding|defense response to oomycetes|leaf senescence|response to bacterium|response to fungus|response to oomycetes|response to salicylic acid|salicylic acid catabolic process
J2O13_01G001389	13.7229	2.12556	25.3203	12.1027	3.59726	0.00966634	0.026204	Up	1.03366	0.107629	0.223076	0.060993	0.0292577	0	CTOMT1	Cathecol O-methyltransferase 1	ko00380,ko00940	Tryptophan metabolism|Phenylpropanoid biosynthesis	GO:0008171,GO:0046983,GO:0008757,GO:0019438,GO:0032259	O-methyltransferase activity|protein dimerization activity|S-adenosylmethionine-dependent methyltransferase activity|aromatic compound biosynthetic process|methylation
J2O13_01G001390	38620.6	54993.1	22248.1	0.404562	-1.30557	0.000141911	0.000647338	Down	419.435	556.698	407.317	1122.53	1084.05	563.561	CURT1B	Protein CURVATURE THYLAKOID 1B, chloroplastic			GO:0009507,GO:0009941,GO:0042644,GO:0030093,GO:0009534,GO:0009535,GO:0005829,GO:0009515,GO:0009579,GO:0003677,GO:0019904,GO:0090391,GO:0097753,GO:0009773	chloroplast|chloroplast envelope|chloroplast nucleoid|chloroplast photosystem I|chloroplast thylakoid|chloroplast thylakoid membrane|cytosol|granal stacked thylakoid|thylakoid|DNA binding|protein domain specific binding|granum assembly|membrane bending|photosynthetic electron transport in photosystem I
J2O13_01G001409	21.181	5.59233	36.7698	6.51797	2.70442	8.36E-05	0.000401417	Up	2.15833	4.69243	2.74315	0.221598	0.425194	0.578155
J2O13_01G001415	7.39811	14.7962	0	0.0122054	-6.35634	0.00170072	0.00583155	Down	0	0	0	0.378144	0.174674	0.0274051	NAC043	NAC domain-containing protein 43			GO:0005634,GO:0003677,GO:0003700,GO:0010047,GO:0009834,GO:0045893	nucleus|DNA binding|DNA-binding transcription factor activity|fruit dehiscence|plant-type secondary cell wall biogenesis|positive regulation of DNA-templated transcription
J2O13_01G001421	5401.05	2310.23	8491.87	3.67638	1.87829	7.39E-53	4.39E-50	Up	95.5308	96.8916	88.4991	21.2146	21.2051	20.3535	CIPK9	CBL-interacting serine/threonine-protein kinase 9			GO:0005737,GO:0005634,GO:0005524,GO:0106310,GO:0004674,GO:0051365,GO:0055075,GO:0006468,GO:0043266,GO:0009409,GO:0010555,GO:0009651,GO:0009611,GO:0007165	cytoplasm|nucleus|ATP binding|protein serine kinase activity|protein serine/threonine kinase activity|cellular response to potassium ion starvation|potassium ion homeostasis|protein phosphorylation|regulation of potassium ion transport|response to cold|response to mannitol|response to salt stress|response to wounding|signal transduction
J2O13_01G001427	721.605	51.8923	1391.32	26.726	4.74017	2.12E-32	2.82E-30	Up	10.0567	20.3135	17.5698	0.282274	0.476249	0.742808	BHLH14	Transcription factor bHLH14	ko04016,ko04075	MAPK signaling pathway - plant|Plant hormone signal transduction	GO:0005737,GO:0005634,GO:0003700,GO:0046983,GO:0000976,GO:0010629,GO:0006355	cytoplasm|nucleus|DNA-binding transcription factor activity|protein dimerization activity|transcription cis-regulatory region binding|negative regulation of gene expression|regulation of DNA-templated transcription
J2O13_01G001434	1510.18	387.442	2632.92	6.79296	2.76404	7.19E-08	6.44E-07	Up	33.5609	86.028	40.1508	3.98909	4.23946	11.7759	ATHB-7	Homeobox-leucine zipper protein ATHB-7			GO:0005634,GO:0003700,GO:0000981,GO:0043565,GO:0000976,GO:0045893,GO:0009737,GO:0009414	nucleus|DNA-binding transcription factor activity|DNA-binding transcription factor activity, RNA polymerase II-specific|sequence-specific DNA binding|transcription cis-regulatory region binding|positive regulation of DNA-templated transcription|response to abscisic acid|response to water deprivation
J2O13_01G001438	235.499	350.404	120.594	0.344054	-1.53929	0.000761208	0.0028808	Down	2.02055	1.77076	2.5828	3.21909	3.21702	9.24439	TAC1	Protein TILLER ANGLE CONTROL 1			GO:0001763,GO:0060771	morphogenesis of a branching structure|phyllotactic patterning
J2O13_01G001441	9518.44	13496.9	5539.97	0.410466	-1.28467	3.51E-11	5.22E-10	Down	102.803	111.981	91.8506	226.655	207.149	177.319
J2O13_01G001449	463.936	180.671	747.201	4.1343	2.04764	4.69E-12	7.90E-11	Up	75.6606	39.0366	51.249	9.66004	10.712	12.8267	KIC	Calcium-binding protein KIC			GO:0005509,GO:0010091	calcium ion binding|trichome branching
J2O13_01G001457	132.274	68.3148	196.233	2.86663	1.51936	0.00726318	0.0204778	Up	3.2048	1.90087	3.41635	0.44068	0.469755	1.61683	DOF2.5	Dof zinc finger protein DOF2.5			GO:0005634,GO:0003677,GO:0003700,GO:0046872,GO:0071491,GO:0071462,GO:0010372,GO:0010030,GO:0010161,GO:0009409,GO:0009416,GO:0009845	nucleus|DNA binding|DNA-binding transcription factor activity|metal ion binding|cellular response to red light|cellular response to water stimulus|positive regulation of gibberellin biosynthetic process|positive regulation of seed germination|red light signaling pathway|response to cold|response to light stimulus|seed germination
J2O13_01G001464	53.5508	33.5046	73.5971	2.1984	1.13645	0.00484083	0.0144141	Up	0.520351	0.515302	0.840421	0.251328	0.172228	0.281023	KLCR1	Protein KINESIN LIGHT CHAIN-RELATED 1			GO:0005737,GO:0005829,GO:0005874	cytoplasm|cytosol|microtubule
J2O13_01G001471	2489.7	3461.35	1518.06	0.438518	-1.18929	6.39E-10	7.92E-09	Down	73.1313	61.0393	62.4259	101.65	108.123	163.535
J2O13_01G001473	27.8405	15.8734	39.8075	2.51472	1.3304	0.00471205	0.0140666	Up	1.28794	2.10098	1.96704	0.645973	0.546825	0.557655
J2O13_01G001481	1594.03	873.873	2314.18	2.64923	1.40558	5.61E-29	5.81E-27	Up	24.5756	27.7147	25.6657	8.22413	7.99053	7.97185	MTB1	Transcription factor MTB1			GO:0005634,GO:0003700,GO:0046983,GO:0000976,GO:0006952,GO:0031347,GO:0006355,GO:2000022	nucleus|DNA-binding transcription factor activity|protein dimerization activity|transcription cis-regulatory region binding|defense response|regulation of defense response|regulation of DNA-templated transcription|regulation of jasmonic acid mediated signaling pathway
J2O13_01G001485	7.49669	0.648077	14.3453	21.5507	4.42967	0.000602418	0.00234094	Up	0.779273	0.588271	0.750323	0	0.0399787	0.0407706	CYP703A3	Cytochrome P450 703A2			GO:0016020,GO:0052722,GO:0020037,GO:0005506,GO:0016709,GO:0048653,GO:0002933,GO:0051792,GO:0010584,GO:0080110	membrane|fatty acid in-chain hydroxylase activity|heme binding|iron ion binding|oxidoreductase activity, acting on paired donors, with incorporation or reduction of molecular oxygen, NAD(P)H as one donor, and incorporation of one atom of oxygen|anther development|lipid hydroxylation|medium-chain fatty acid biosynthetic process|pollen exine formation|sporopollenin biosynthetic process
J2O13_01G001487	4057.29	1957.49	6157.1	3.14506	1.65309	0.00018023	0.000802206	Up	125.907	106.115	134.874	19.6415	18.1015	61.4512	APF2	Aspartyl protease family protein 2			GO:0009505,GO:0004190,GO:0006508	plant-type cell wall|aspartic-type endopeptidase activity|proteolysis
J2O13_01G001497	26688.5	36628.9	16748.2	0.457242	-1.12897	9.58E-09	9.95E-08	Down	59.0532	61.5598	51.3541	113.23	106.615	87.6639	REC1	Protein REDUCED CHLOROPLAST COVERAGE 1			GO:0005737,GO:0005829,GO:0005576,GO:0005634,GO:0003729,GO:0019750,GO:0006996,GO:0010906	cytoplasm|cytosol|extracellular region|nucleus|mRNA binding|chloroplast localization|organelle organization|regulation of glucose metabolic process
J2O13_01G001507	5743.74	7917.88	3569.6	0.450829	-1.14935	3.78E-05	0.000196284	Down	30.2752	47.4337	30.7275	73.2995	69.9345	53.2858
J2O13_01G001512	7.20194	0.618178	13.7857	21.3538	4.41642	0.0101684	0.0273982	Up	0.0243523	0.0980452	0.218844	0	0	0.0135902	PLIP1	Phospholipase A1 PLIP1, chloroplastic			GO:0009534,GO:0009535,GO:0102549,GO:0052740,GO:0047714,GO:0052739,GO:0008970,GO:0015908,GO:0016042,GO:0019432	chloroplast thylakoid|chloroplast thylakoid membrane|1-18:1-2-16:0-monogalactosyldiacylglycerol lipase activity|1-acyl-2-lysophosphatidylserine acylhydrolase activity|galactolipase activity|phosphatidylserine 1-acylhydrolase activity|phospholipase A1 activity|fatty acid transport|lipid catabolic process|triglyceride biosynthetic process
J2O13_01G001521	2286.94	1302.88	3270.99	2.51083	1.32816	7.29E-33	1.01E-30	Up	44.4168	50.1125	45.0604	15.2445	14.2666	16.3192	WRKY30	Probable WRKY transcription factor 30			GO:0005737,GO:0005634,GO:0003700,GO:0000976,GO:0010150,GO:0042542,GO:0010193,GO:0009751	cytoplasm|nucleus|DNA-binding transcription factor activity|transcription cis-regulatory region binding|leaf senescence|response to hydrogen peroxide|response to ozone|response to salicylic acid
J2O13_01G001525	560.82	811.72	309.919	0.381673	-1.38959	1.05E-06	7.56E-06	Down	3.61574	3.62761	3.70602	6.16726	5.8976	11.98	TBL25	Protein trichome birefringence-like 25			GO:0005794,GO:0016020,GO:0016413	Golgi apparatus|membrane|O-acetyltransferase activity
J2O13_01G001528	4742.4	2512.78	6972.02	2.77491	1.47244	2.79E-07	2.23E-06	Up	85.0456	61.9149	74.3805	25.0109	24.5368	15.2084	JAR6	Jasmonoyl--L-amino acid synthetase JAR6	ko04075	Plant hormone signal transduction	GO:0102053,GO:0005524,GO:0102058,GO:0102057,GO:0006952	(-)-jasmonoyl-isoleucine synthetase activity|ATP binding|jasmonoyl-leucine synthetase activity|jasmonoyl-valine synthetase activity|defense response
J2O13_01G001537	404.409	587.232	221.587	0.37756	-1.40522	8.37E-11	1.18E-09	Down	2.5135	3.06184	3.07789	7.14639	5.92503	5.68632	MTM1	Mitochondrial carrier protein MTM1			GO:0016020,GO:0005743,GO:0005739,GO:0016530,GO:0004784,GO:0006828,GO:1990542,GO:1901562,GO:0097501	membrane|mitochondrial inner membrane|mitochondrion|metallochaperone activity|superoxide dismutase activity|manganese ion transport|mitochondrial transmembrane transport|response to paraquat|stress response to metal ion
J2O13_01G001538	31.0907	56.9845	5.19695	0.0912131	-3.45462	5.93E-06	3.67E-05	Down	0.116197	0.146194	0.19579	0.695921	0.882256	2.69919	PDV2	Plastid division protein PDV2			GO:0009707,GO:0005739,GO:0009536,GO:0070273,GO:0010020,GO:0009739	chloroplast outer membrane|mitochondrion|plastid|phosphatidylinositol-4-phosphate binding|chloroplast fission|response to gibberellin
J2O13_01G001541	58.3674	102.145	14.5897	0.142529	-2.81067	5.43E-05	0.000272219	Down	0.401636	1.25769	0.300779	4.35275	4.54225	2.27875
J2O13_01G001543	52.5999	91.8116	13.3882	0.145929	-2.77666	1.01E-06	7.30E-06	Down	0.461882	0.371918	0.415074	2.0813	3.53856	1.31458
J2O13_01G001544	7745.22	11149.8	4340.61	0.389307	-1.36102	4.28E-10	5.48E-09	Down	62.0493	68.9586	61.9783	151.012	145.553	107.694	LTPG10	Non-specific lipid transfer protein GPI-anchored 10			GO:0005886	plasma membrane
J2O13_01G001546	908.049	404.777	1411.32	3.48948	1.80301	7.60E-18	2.69E-16	Up	51.3479	60.8136	65.8269	15.4513	14.2772	11.9476
J2O13_01G001547	1223.96	554.685	1893.24	3.41174	1.77051	1.76E-05	9.82E-05	Up	148.997	162.634	144.765	23.0978	22.7479	67.7288
J2O13_01G001548	115.513	59.5201	171.507	2.87655	1.52434	0.000332607	0.0013872	Up	1.65068	2.01232	1.65845	0.491238	0.26089	0.798171	ERF117	Ethylene-responsive transcription factor ERF117			GO:0005634,GO:0003677,GO:0003700,GO:0009873	nucleus|DNA binding|DNA-binding transcription factor activity|ethylene-activated signaling pathway
J2O13_01G001551	21.5294	38.8092	4.24969	0.109687	-3.18853	1.48E-05	8.44E-05	Down	0.233536	0.11753	0.149906	1.7317	1.21407	0.749388
J2O13_01G001559	1.46412e+06	2.24234e+06	685890	0.305881	-1.70896	3.01E-19	1.24E-17	Down	15771.5	22187.8	15818.5	48512.1	47593.6	48630.7	RBCS	Ribulose bisphosphate carboxylase small subunit, chloroplastic	ko00630,ko00710	Glyoxylate and dicarboxylate metabolism|Carbon fixation in photosynthetic organisms	GO:0009507,GO:0016984,GO:0009853,GO:0019253	chloroplast|ribulose-bisphosphate carboxylase activity|photorespiration|reductive pentose-phosphate cycle
J2O13_01G001561	4258.71	2838.24	5679.17	2.00106	1.00076	4.36E-05	0.000222823	Up	120.52	162.269	106.886	55.986	57.9783	45.4849
J2O13_01G001574	197.972	50.7856	345.158	6.80958	2.76757	9.96E-17	3.04E-15	Up	5.50195	7.70191	4.44994	0.811128	0.680908	0.63771	MYB62	Transcription factor MYB62			GO:0005634,GO:0003700,GO:0043565,GO:0016036,GO:0009740,GO:0009686,GO:0045892,GO:0010373,GO:0055062,GO:0006355,GO:0010015	nucleus|DNA-binding transcription factor activity|sequence-specific DNA binding|cellular response to phosphate starvation|gibberellic acid mediated signaling pathway|gibberellin biosynthetic process|negative regulation of DNA-templated transcription|negative regulation of gibberellin biosynthetic process|phosphate ion homeostasis|regulation of DNA-templated transcription|root morphogenesis
J2O13_01G001581	1829.04	1056.99	2601.1	2.45999	1.29865	3.05E-14	6.90E-13	Up	14.1251	17.1823	16.2448	4.36415	4.98462	6.70537	BTS	Zinc finger protein BRUTUS			GO:0016020,GO:0005634,GO:0005506,GO:0016874,GO:0061630,GO:0008270,GO:0071456,GO:0010106,GO:0060586,GO:0016567,GO:0006511	membrane|nucleus|iron ion binding|ligase activity|ubiquitin protein ligase activity|zinc ion binding|cellular response to hypoxia|cellular response to iron ion starvation|multicellular organismal iron ion homeostasis|protein ubiquitination|ubiquitin-dependent protein catabolic process
J2O13_01G001585	284.486	144.623	424.348	2.93477	1.55325	1.14E-07	9.83E-07	Up	7.5539	6.1133	5.93616	1.46235	2.43012	1.58404	SARD1	Protein SAR DEFICIENT 1			GO:0005634,GO:0003700,GO:0043565,GO:0071219,GO:0042742,GO:0002229,GO:0009626,GO:1900426,GO:0006355,GO:0080142,GO:0010112,GO:0009617,GO:0010224	nucleus|DNA-binding transcription factor activity|sequence-specific DNA binding|cellular response to molecule of bacterial origin|defense response to bacterium|defense response to oomycetes|plant-type hypersensitive response|positive regulation of defense response to bacterium|regulation of DNA-templated transcription|regulation of salicylic acid biosynthetic process|regulation of systemic acquir…
J2O13_01G001586	16.8025	8.03397	25.571	3.17922	1.66867	0.013767	0.035469	Up	0.227653	0.580486	0.365325	0.0779113	0.124578	0.101636	LRK10L-1.1	LEAF RUST 10 DISEASE-RESISTANCE LOCUS RECEPTOR-LIKE PROTEIN KINASE-like 1.1			GO:0005886,GO:0005524,GO:0030247,GO:0106310,GO:0004674,GO:0006468	plasma membrane|ATP binding|polysaccharide binding|protein serine kinase activity|protein serine/threonine kinase activity|protein phosphorylation
J2O13_01G001587	849.838	491.006	1208.67	2.46287	1.30034	6.95E-17	2.15E-15	Up	7.607	6.51407	7.3075	2.29801	2.58892	2.25323	LRK10L-1.2	LEAF RUST 10 DISEASE-RESISTANCE LOCUS RECEPTOR-LIKE PROTEIN KINASE-like 1.2			GO:0005886,GO:0005524,GO:0030247,GO:0106310,GO:0004674,GO:0071215,GO:0042631,GO:0048573,GO:0006468	plasma membrane|ATP binding|polysaccharide binding|protein serine kinase activity|protein serine/threonine kinase activity|cellular response to abscisic acid stimulus|cellular response to water deprivation|photoperiodism, flowering|protein phosphorylation
J2O13_01G001588	81.1503	20.3548	141.946	7.00298	2.80797	1.38E-05	7.88E-05	Up	3.8208	3.01818	3.56244	0.455185	0.635194	0.101215	PR5K	PR5-like receptor kinase			GO:0016020,GO:0009506,GO:0005524,GO:0004672,GO:0106310,GO:0004675,GO:0006468,GO:0009620	membrane|plasmodesma|ATP binding|protein kinase activity|protein serine kinase activity|transmembrane receptor protein serine/threonine kinase activity|protein phosphorylation|response to fungus
J2O13_01G001591	2692.21	763.908	4620.51	6.04684	2.59618	2.27E-15	5.95E-14	Up	569.157	316.23	506.601	45.5523	52.1816	94.9557		Non-specific lipid-transfer protein 2 OS=Prunus armeniaca OX=36596 PE=1 SV=1			GO:0008289,GO:0006869	lipid binding|lipid transport
J2O13_01G001592	538.087	339.785	736.389	2.16576	1.11487	0.0115346	0.0305565	Up	8.13159	8.55822	7.64033	1.51287	2.37424	5.65571	POPTR_0012s05040g	L-Ala-D/L-amino acid epimerase			GO:0000287,GO:0016854,GO:0016855,GO:0006518	magnesium ion binding|racemase and epimerase activity|racemase and epimerase activity, acting on amino acids and derivatives|peptide metabolic process
J2O13_01G001593	72.118	43.484	100.752	2.31627	1.21181	0.0108493	0.0289568	Up	1.02338	0.477711	0.764014	0.177658	0.37132	0.254519	At1g11410	G-type lectin S-receptor-like serine/threonine-protein kinase At1g11410			GO:0005886,GO:0005524,GO:0005516,GO:0030246,GO:0106310,GO:0004674,GO:0031625,GO:0006468,GO:0048544	plasma membrane|ATP binding|calmodulin binding|carbohydrate binding|protein serine kinase activity|protein serine/threonine kinase activity|ubiquitin protein ligase binding|protein phosphorylation|recognition of pollen
J2O13_01G001601	141.345	200.191	82.4984	0.412299	-1.27824	0.00760193	0.0212897	Down	1.40376	1.2458	1.11907	2.8541	3.3205	1.20036			ko00550,ko04112,ko01502	Peptidoglycan biosynthesis|Cell cycle - Caulobacter|Vancomycin resistance
J2O13_01G001604	592.206	214.274	970.138	4.52494	2.1779	1.36E-14	3.21E-13	Up	33.6207	26.5244	45.3341	5.66736	5.05509	8.63198
J2O13_01G001605	1218.27	110.887	2325.65	20.989	4.39156	9.83E-10	1.18E-08	Up	45.315	205.85	71.0671	5.7803	5.31916	1.2311
J2O13_01G001614	63.9894	27.8028	100.176	3.6009	1.84836	0.00250143	0.00811915	Up	24.6842	15.0901	5.97824	2.8505	4.10208	3.54949
J2O13_01G001615	146.894	56.9612	236.827	4.16357	2.05782	1.89E-07	1.56E-06	Up	6.73534	4.38662	3.81478	0.963427	1.24951	0.715678	SDR1	(+)-neomenthol dehydrogenase	ko00590,ko00790,ko00980,ko05204,ko05208	Arachidonic acid metabolism|Folate biosynthesis|Metabolism of xenobiotics by cytochrome P450|Chemical carcinogenesis - DNA adducts|Chemical carcinogenesis - reactive oxygen species	GO:0005737,GO:0047501,GO:0006952	cytoplasm|(+)-neomenthol dehydrogenase activity|defense response
J2O13_01G001619	322.426	158.129	486.723	3.07363	1.61994	5.98E-25	4.18E-23	Up	9.35262	8.93144	9.98319	2.19729	2.3912	3.01612	RPS16-2	30S ribosomal protein S16-2, chloroplastic/mitochondrial	ko03010	Ribosome	GO:0009507,GO:0005739,GO:0009536,GO:0015935,GO:0003735,GO:0006412	chloroplast|mitochondrion|plastid|small ribosomal subunit|structural constituent of ribosome|translation
J2O13_01G001623	6.57007	11.8704	1.26976	0.108797	-3.20029	0.00772602	0.0215711	Down	0.0194068	0	0.0560575	0.199252	0.223019	0.146209	At1g65750	Putative ribonuclease H protein At1g65750			GO:0046872,GO:0003676,GO:0004523	metal ion binding|nucleic acid binding|RNA-DNA hybrid ribonuclease activity
J2O13_01G001641	5835.36	533.181	11137.5	20.876	4.38377	4.65E-68	5.52E-65	Up	49.4919	45.9739	60.0331	1.3943	1.93471	2.88632	P2	NADP-dependent alkenal double bond reductase P2			GO:0005886,GO:0009536,GO:0032440,GO:0006979	plasma membrane|plastid|2-alkenal reductase [NAD(P)+] activity|response to oxidative stress
J2O13_01G001648	28.8326	7.72294	49.9422	6.4663	2.69294	0.00629232	0.0180579	Up	1.2031	0.264463	0.625807	0.0236637	0.192971	0.0463043	At5g48380	Probably inactive leucine-rich repeat receptor-like protein kinase At5g48380			GO:0005886,GO:0009506,GO:0005524,GO:0042802,GO:0016301,GO:0004672,GO:0033612,GO:0042742,GO:0060548,GO:0031348,GO:0006468	plasma membrane|plasmodesma|ATP binding|identical protein binding|kinase activity|protein kinase activity|receptor serine/threonine kinase binding|defense response to bacterium|negative regulation of cell death|negative regulation of defense response|protein phosphorylation
J2O13_01G001649	324.023	64.6033	583.442	9.05222	3.17827	1.18E-32	1.60E-30	Up	4.05572	3.61626	4.55034	0.348778	0.465053	0.289185	At5g48380	Probably inactive leucine-rich repeat receptor-like protein kinase At5g48380			GO:0005886,GO:0009506,GO:0005524,GO:0042802,GO:0016301,GO:0004672,GO:0033612,GO:0042742,GO:0060548,GO:0031348,GO:0006468	plasma membrane|plasmodesma|ATP binding|identical protein binding|kinase activity|protein kinase activity|receptor serine/threonine kinase binding|defense response to bacterium|negative regulation of cell death|negative regulation of defense response|protein phosphorylation
J2O13_01G001650	36.4643	12.4	60.5286	4.85033	2.27808	0.000341494	0.00141994	Up	0.597459	1.06395	1.15053	0.117965	0.0754491	0.29495	At5g48380	Probably inactive leucine-rich repeat receptor-like protein kinase At5g48380			GO:0005886,GO:0009506,GO:0005524,GO:0042802,GO:0016301,GO:0004672,GO:0033612,GO:0042742,GO:0060548,GO:0031348,GO:0006468	plasma membrane|plasmodesma|ATP binding|identical protein binding|kinase activity|protein kinase activity|receptor serine/threonine kinase binding|defense response to bacterium|negative regulation of cell death|negative regulation of defense response|protein phosphorylation
J2O13_01G001675	3746.28	5019.51	2473.06	0.492711	-1.02119	2.45E-05	0.000132597	Down	13.2235	13.5083	12.1029	23.9418	24.0424	16.2068	RAP	RAP domain-containing protein, chloroplastic			GO:0009507,GO:0042644,GO:0005759,GO:0042646,GO:0035770,GO:0003723,GO:1901259,GO:0006952,GO:0000963,GO:0044528	chloroplast|chloroplast nucleoid|mitochondrial matrix|plastid nucleoid|ribonucleoprotein granule|RNA binding|chloroplast rRNA processing|defense response|mitochondrial RNA processing|regulation of mitochondrial mRNA stability
J2O13_01G001707	1510.91	2050.09	971.737	0.474002	-1.07703	9.79E-11	1.36E-09	Down	27.5848	20.9333	26.93	41.0012	38.4738	52.2072	At5g56260	Putative 4-hydroxy-4-methyl-2-oxoglutarate aldolase 3			GO:0009536,GO:0047443,GO:0046872,GO:0008948,GO:0008428,GO:0051252	plastid|4-hydroxy-4-methyl-2-oxoglutarate aldolase activity|metal ion binding|oxaloacetate decarboxylase activity|ribonuclease inhibitor activity|regulation of RNA metabolic process
J2O13_01G001727	810.213	1510.53	109.898	0.0727022	-3.78186	8.82E-17	2.70E-15	Down	0.946376	1.40776	0.419321	11.1067	11.9549	8.16748	GB1	Guanine nucleotide-binding protein subunit beta			GO:0080008,GO:0005737,GO:0005783,GO:0005834,GO:0005634,GO:0005886,GO:0003924,GO:0030159,GO:0009738,GO:0050832,GO:0030968,GO:0010154,GO:0007186,GO:0009867,GO:0048527,GO:1905392,GO:0072593,GO:2000280,GO:0009723,GO:0009991,GO:0048364,GO:0009845,GO:0010118	Cul4-RING E3 ubiquitin ligase complex|cytoplasm|endoplasmic reticulum|heterotrimeric G-protein complex|nucleus|plasma membrane|GTPase activity|signaling receptor complex adaptor activity|abscisic acid-activated signaling pathway|defense response to fungus|endoplasmic reticulum unfolded protein response|fruit development|G protein-coupled receptor signaling pathway|jasmonic acid mediated signaling…
J2O13_01G001732	1049.9	1777.8	321.993	0.181106	-2.46509	1.81E-08	1.80E-07	Down	4.55212	7.60284	4.06191	29.0895	30.1937	13.1905	PCMP-E13	Pentatricopeptide repeat-containing protein At5g56310			GO:0003723,GO:0009451	RNA binding|RNA modification
J2O13_01G001775	110.285	163.358	57.2112	0.349775	-1.5155	8.17E-06	4.92E-05	Down	0.891517	1.54648	0.840133	2.41817	2.58463	2.7311
J2O13_01G001816	21.9105	40.1823	3.63871	0.0901198	-3.47201	0.000488753	0.00194638	Down	0.531662	0.133784	0.0639889	0.796053	3.16398	2.78159	Os01g0915401	Cysteine proteinase inhibitor 5			GO:0005576,GO:0004869,GO:0006952,GO:0010466	extracellular region|cysteine-type endopeptidase inhibitor activity|defense response|negative regulation of peptidase activity
J2O13_01G001818	22348.9	32959.9	11737.8	0.356124	-1.48955	4.81E-10	6.09E-09	Down	55.5358	61.1623	53.293	144.837	145.442	98.5173	SPP	Stromal processing peptidase, chloroplastic			GO:0009507,GO:0009570,GO:0005739,GO:0009536,GO:0046872,GO:0008237,GO:0003729,GO:0009793,GO:0006508	chloroplast|chloroplast stroma|mitochondrion|plastid|metal ion binding|metallopeptidase activity|mRNA binding|embryo development ending in seed dormancy|proteolysis
J2O13_01G001862	1785.7	727.562	2843.83	3.90922	1.96688	9.73E-07	7.03E-06	Up	35.9215	18.9287	32.4722	5.29124	8.88979	3.93984	Os04g0338000	Probable aldo-keto reductase 2			GO:0005737,GO:0004033	cytoplasm|aldo-keto reductase (NADP) activity
J2O13_01G001872	15.889	27.173	4.60496	0.16856	-2.56867	0.000940089	0.00346919	Down	0.234288	0.134753	0.0966788	0.515457	0.521993	1.2888	GDI1	Rho GDP-dissociation inhibitor 1	ko04962,ko04722	Vasopressin-regulated water reabsorption|Neurotrophin signaling pathway	GO:0005829,GO:0016020,GO:0005096,GO:0005094,GO:0009932,GO:0007266,GO:0010053	cytosol|membrane|GTPase activator activity|Rho GDP-dissociation inhibitor activity|cell tip growth|Rho protein signal transduction|root epidermal cell differentiation
J2O13_01G001884	6769.97	9236.18	4303.76	0.465978	-1.10167	2.39E-05	0.000129137	Down	40.2888	49.0006	41.0269	88.5525	82.9025	56.095	PDS1	15-cis-phytoene desaturase, chloroplastic/chromoplastic	ko00906	Carotenoid biosynthesis	GO:0009507,GO:0009509,GO:0016020,GO:0071949,GO:0016491,GO:0016166,GO:0016120,GO:0016117,GO:0051289	chloroplast|chromoplast|membrane|FAD binding|oxidoreductase activity|phytoene dehydrogenase activity|carotene biosynthetic process|carotenoid biosynthetic process|protein homotetramerization
J2O13_01G001890	1561.67	493.96	2629.39	5.32171	2.41189	0.00313389	0.0098664	Up	48.431	45.2985	47.6745	1.88351	1.64671	19.7506		Xyloglucan endotransglucosylase/hydrolase 2 OS=Glycine max OX=3847 PE=2 SV=1			GO:0048046,GO:0004553,GO:0030247,GO:0016762,GO:0042546,GO:0010411	apoplast|hydrolase activity, hydrolyzing O-glycosyl compounds|polysaccharide binding|xyloglucan:xyloglucosyl transferase activity|cell wall biogenesis|xyloglucan metabolic process
J2O13_01G001951	26.7576	3.39998	50.1152	14.5201	3.85998	0.00671149	0.019113	Up	1.05828	0.511293	0.570622	0	0	0.12993	HIPP45	Heavy metal-associated isoprenylated plant protein 45			GO:0046872,GO:0050896	metal ion binding|response to stimulus
J2O13_01G001976	51.8563	32.4247	71.2879	2.20381	1.14	0.000529885	0.00208824	Up	2.14445	2.65656	2.31891	0.959731	0.866587	0.828516	COX3	Cytochrome c oxidase subunit 3	ko00190,ko04260,ko04714,ko05208,ko05010,ko05012,ko05014,ko05016,ko05020,ko05022,ko05415,ko04932	Oxidative phosphorylation|Cardiac muscle contraction|Thermogenesis|Chemical carcinogenesis - reactive oxygen species|Alzheimer disease|Parkinson disease|Amyotrophic lateral sclerosis|Huntington disease|Prion disease|Pathways of neurodegeneration - multiple diseases|Diabetic cardiomyopathy|Non-alcoholic fatty liver disease	GO:0005743,GO:0005739,GO:0004129,GO:0009055,GO:0015453,GO:0009060,GO:0006123	mitochondrial inner membrane|mitochondrion|cytochrome-c oxidase activity|electron transfer activity|oxidoreduction-driven active transmembrane transporter activity|aerobic respiration|mitochondrial electron transport, cytochrome c to oxygen
J2O13_01G001978	3658.32	5657.07	1659.57	0.293357	-1.76927	6.59E-36	1.12E-33	Down	18.6995	18.5314	16.411	51.3145	50.922	47.8809	Z-ISO	15-cis-zeta-carotene isomerase, chloroplastic	ko00906	Carotenoid biosynthesis	GO:0009507,GO:0031969,GO:0090471,GO:0016120	chloroplast|chloroplast membrane|9,15,9'-tri-cis-zeta-carotene isomerase activity|carotene biosynthetic process
J2O13_01G001985	50.1531	32.0559	68.2504	2.13315	1.09299	0.00317048	0.00996749	Up	2.55057	3.99894	3.58926	1.42686	1.20785	1.27284
J2O13_01G001986	441.99	769.888	114.093	0.14817	-2.75467	6.37E-18	2.28E-16	Down	15.2421	22.3151	15.5653	114.603	104.767	72.5596
J2O13_01G001987	3986.68	2289.48	5683.87	2.48217	1.3116	2.47E-20	1.12E-18	Up	32.3913	34.0179	37.9857	9.55077	11.2869	14.0114		Pathogenesis-related thaumatin-like protein 3.5 OS=Cryptomeria japonica OX=3369 PE=1 SV=1			GO:0006952,GO:0009737,GO:0009607	defense response|response to abscisic acid|response to biotic stimulus
J2O13_01G001989	70.5379	36.3742	104.702	2.87631	1.52422	2.62E-05	0.000140728	Up	3.10751	1.84592	3.13922	0.675589	0.73178	0.916851
J2O13_01G001996	124.286	69.7359	178.837	2.56041	1.35637	0.00117412	0.00421325	Up	8.51311	4.66721	6.45284	1.1778	2.49781	2.69891	NHL2	NDR1/HIN1-like protein 2			GO:0009507,GO:0005886,GO:0009506,GO:0051607	chloroplast|plasma membrane|plasmodesma|defense response to virus
J2O13_01G001998	30.3217	54.4659	6.1776	0.113832	-3.13503	4.25E-06	2.71E-05	Down	0.0527865	0.0637574	0.0813207	0.722621	0.407296	0.273963	RE2	Retrovirus-related Pol polyprotein from transposon RE2			GO:0004190,GO:0004519,GO:0046872,GO:0003676,GO:0003964,GO:0015074,GO:0006310,GO:0006508	aspartic-type endopeptidase activity|endonuclease activity|metal ion binding|nucleic acid binding|RNA-directed DNA polymerase activity|DNA integration|DNA recombination|proteolysis
J2O13_01G002003	26802.7	35875.2	17730.3	0.494224	-1.01676	0.0154897	0.0391485	Down	91.7622	159.301	99.0718	242.566	228.417	101.402		Fructose-bisphosphate aldolase, cytoplasmic isozyme 1 OS=Pisum sativum OX=3888 PE=2 SV=1	ko00010,ko00030,ko00051,ko00710,ko00680,ko04066	Glycolysis / Gluconeogenesis|Pentose phosphate pathway|Fructose and mannose metabolism|Carbon fixation in photosynthetic organisms|Methane metabolism|HIF-1 signaling pathway	GO:0005737,GO:0004332,GO:0006096	cytoplasm|fructose-bisphosphate aldolase activity|glycolytic process
J2O13_01G002004	74.7078	34.0754	115.34	3.39517	1.76349	0.00147676	0.00515594	Up	2.88966	5.95723	3.28514	1.37023	1.00022	0.524588	FBA5	Fructose-bisphosphate aldolase 5, cytosolic	ko00010,ko00030,ko00051,ko00710,ko00680,ko04066	Glycolysis / Gluconeogenesis|Pentose phosphate pathway|Fructose and mannose metabolism|Carbon fixation in photosynthetic organisms|Methane metabolism|HIF-1 signaling pathway	GO:0005829,GO:0004332,GO:0003729,GO:0030388,GO:0006094,GO:0006096	cytosol|fructose-bisphosphate aldolase activity|mRNA binding|fructose 1,6-bisphosphate metabolic process|gluconeogenesis|glycolytic process
J2O13_01G002005	315.01	617.562	12.4587	0.0201648	-5.63202	1.03E-11	1.66E-10	Down	0.127342	0.288391	0.183917	11.1405	11.3805	1.13261	AVT1H	Amino acid transporter AVT1H			GO:0016020,GO:0015171,GO:0003333	membrane|amino acid transmembrane transporter activity|amino acid transmembrane transport
J2O13_01G002011	597.505	867.45	327.56	0.377672	-1.4048	3.82E-15	9.77E-14	Down	2.04074	2.65316	2.33334	5.37757	4.92648	4.97661	RGI3	LRR receptor-like serine/threonine-protein kinase RGI3			GO:0005886,GO:0005524,GO:0042277,GO:0001653,GO:0106310,GO:0004674,GO:0010074,GO:0010078,GO:0006468,GO:2000280,GO:0010082	plasma membrane|ATP binding|peptide binding|peptide receptor activity|protein serine kinase activity|protein serine/threonine kinase activity|maintenance of meristem identity|maintenance of root meristem identity|protein phosphorylation|regulation of root development|regulation of root meristem growth
J2O13_01G002019	36061.7	50253.1	21870.4	0.435209	-1.20022	1.94E-22	1.08E-20	Down	224.484	197.068	256.41	402.772	410.285	470.986	HSC80	Heat shock cognate protein 80	ko04141,ko04151,ko04217,ko04621,ko04612,ko04659,ko04657,ko04915,ko04914,ko04626,ko05200,ko05207,ko05215,ko05132,ko05417,ko05418	Protein processing in endoplasmic reticulum|PI3K-Akt signaling pathway|Necroptosis|NOD-like receptor signaling pathway|Antigen processing and presentation|Th17 cell differentiation|IL-17 signaling pathway|Estrogen signaling pathway|Progesterone-mediated oocyte maturation|Plant-pathogen interaction|Pathways in cancer|Chemical carcinogenesis - receptor activation|Prostate cancer|Salmonella infectio…	GO:0005829,GO:0048471,GO:0005886,GO:0032991,GO:0005524,GO:0016887,GO:0140662,GO:0051082,GO:0034605,GO:0006457,GO:0050821	cytosol|perinuclear region of cytoplasm|plasma membrane|protein-containing complex|ATP binding|ATP hydrolysis activity|ATP-dependent protein folding chaperone|unfolded protein binding|cellular response to heat|protein folding|protein stabilization
J2O13_01G002033	5.72022	0.648077	10.7924	16.2372	4.02123	0.00349757	0.010873	Up	0.975806	0.523828	0.62637	0	0.0533988	0.0544565
J2O13_01G002041	102.521	160.288	44.7544	0.279094	-1.84118	4.05E-05	0.00020867	Down	3.6769	3.4953	2.03239	9.49606	11.4019	5.92786
J2O13_01G002125	221.867	318.705	125.029	0.392348	-1.3498	0.000366297	0.00151178	Down	3.53628	6.21074	3.89132	10.9293	10.6038	6.76622
J2O13_01G002166	1895.04	817.681	2972.39	3.63404	1.86157	1.78E-42	4.95E-40	Up	39.4679	35.1119	43.7809	7.7426	8.77573	10.4008	DMR6	Protein DOWNY MILDEW RESISTANCE 6			GO:0051213,GO:0033759,GO:0046872,GO:0034785,GO:0071456,GO:0042742,GO:0002229,GO:0009813,GO:0010150,GO:0009617,GO:0009620,GO:0002239,GO:0009751,GO:0046244	dioxygenase activity|flavone synthase activity|metal ion binding|salicylate 5-hydroxylase activity|cellular response to hypoxia|defense response to bacterium|defense response to oomycetes|flavonoid biosynthetic process|leaf senescence|response to bacterium|response to fungus|response to oomycetes|response to salicylic acid|salicylic acid catabolic process
J2O13_01G002170	864.017	1355.99	372.044	0.27441	-1.86559	2.32E-07	1.88E-06	Down	11.9265	19.1634	17.7889	53.2106	60.3763	30.7861	NHL26	NDR1/HIN1-like protein 26			GO:0005783,GO:0005789,GO:0005886,GO:0009506,GO:0009511,GO:0098542,GO:0110126	endoplasmic reticulum|endoplasmic reticulum membrane|plasma membrane|plasmodesma|plasmodesmatal endoplasmic reticulum|defense response to other organism|phloem loading
J2O13_01G002180	388.636	205.095	572.177	2.78736	1.4789	0.00759715	0.0212813	Up	19.9517	24.0274	23.966	2.9513	3.82885	14.1094
J2O13_01G002182	56.9071	30.8323	82.982	2.7002	1.43306	0.0042983	0.0129717	Up	5.25412	4.25148	3.42221	1.54254	1.64901	0.689917
J2O13_01G002193	243.849	121.342	366.355	3.01274	1.59108	8.40E-09	8.83E-08	Up	4.5564	5.23952	4.03856	0.939896	1.1169	1.77646	GB1	Guanine nucleotide-binding protein subunit beta			GO:0080008,GO:0005737,GO:0005783,GO:0005834,GO:0030159,GO:0050832,GO:0030968,GO:0010154,GO:0007186,GO:0009867,GO:0048527,GO:1905392,GO:0072593,GO:2000280,GO:0009723,GO:0009991,GO:0009845,GO:0010118	Cul4-RING E3 ubiquitin ligase complex|cytoplasm|endoplasmic reticulum|heterotrimeric G-protein complex|signaling receptor complex adaptor activity|defense response to fungus|endoplasmic reticulum unfolded protein response|fruit development|G protein-coupled receptor signaling pathway|jasmonic acid mediated signaling pathway|lateral root development|plant organ morphogenesis|reactive oxygen specie…
J2O13_01G002249	98.9485	21.5205	176.377	8.20608	3.03669	0.000869281	0.00323876	Up	10.9368	1.49373	4.81481	0.414046	1.11224	0.162038
J2O13_01G002254	1748.5	2412.27	1084.74	0.44972	-1.1529	2.63E-08	2.56E-07	Down	15.777	16.2666	14.6704	31.4767	29.8946	23.4485	PLR1	Pyridoxal reductase, chloroplastic	ko00750	Vitamin B6 metabolism	GO:0009507,GO:0005737,GO:0009536,GO:0004033,GO:0070402,GO:0050236,GO:0009443,GO:0042821,GO:0042820	chloroplast|cytoplasm|plastid|aldo-keto reductase (NADP) activity|NADPH binding|pyridoxine:NADP 4-dehydrogenase activity|pyridoxal 5'-phosphate salvage|pyridoxal biosynthetic process|vitamin B6 catabolic process
J2O13_01G002257	268.744	30.4514	507.037	16.7756	4.06829	8.15E-37	1.48E-34	Up	6.03436	7.08396	6.13633	0.440087	0.267744	0.231039	HOX6	Homeobox-leucine zipper protein HOX6			GO:0005634,GO:0000981,GO:0043565	nucleus|DNA-binding transcription factor activity, RNA polymerase II-specific|sequence-specific DNA binding
J2O13_01G002279	524.012	220.894	827.129	3.7477	1.90601	2.86E-13	5.70E-12	Up	7.4828	4.79573	7.31762	1.53039	1.49387	1.24885	PUB44	U-box domain-containing protein 44			GO:0005737,GO:0005634,GO:0005886,GO:0070696,GO:0004842,GO:0010150,GO:0090359,GO:0010115,GO:0010380,GO:0010271	cytoplasm|nucleus|plasma membrane|transmembrane receptor protein serine/threonine kinase binding|ubiquitin-protein transferase activity|leaf senescence|negative regulation of abscisic acid biosynthetic process|regulation of abscisic acid biosynthetic process|regulation of chlorophyll biosynthetic process|regulation of chlorophyll catabolic process
J2O13_01G002297	1867.78	2784.22	951.346	0.341692	-1.54923	0.00608736	0.0175744	Down	8.7523	9.9966	4.60517	22.9455	25.6456	6.36647	YSL3	Metal-nicotianamine transporter YSL3			GO:0016020,GO:0005886,GO:0051980,GO:0035673,GO:0003006,GO:0010039,GO:0009624,GO:0048316	membrane|plasma membrane|iron-nicotianamine transmembrane transporter activity|oligopeptide transmembrane transporter activity|developmental process involved in reproduction|response to iron ion|response to nematode|seed development
J2O13_01G002323	140.441	211.626	69.257	0.327246	-1.61155	0.000100372	0.000474127	Down	4.66957	10.4219	6.1577	20.5843	18.2483	14.191
J2O13_01G002335	5.70008	11.0639	0.336275	0.0317384	-4.97763	0.00112854	0.00407762	Down	0	0.040309	0	0.30838	0.427345	0.368762
J2O13_01G002347	118.414	233.18	3.64727	0.015551	-6.00685	3.79E-12	6.48E-11	Down	0.0441992	0.355903	0.0851144	10.7399	11.2107	3.07093
J2O13_01G002353	6370.74	9172.98	3568.49	0.38903	-1.36204	1.83E-07	1.51E-06	Down	49.6599	62.6534	52.8807	132.766	127.323	85.4579	PPH1	Protein phosphatase 2C 57	ko04010	MAPK signaling pathway	GO:0009507,GO:0009570,GO:0005737,GO:0016020,GO:0005730,GO:0005634,GO:0009579,GO:0000287,GO:0030145,GO:0017018,GO:0016791,GO:0016311,GO:0009767,GO:0080005,GO:0006470	chloroplast|chloroplast stroma|cytoplasm|membrane|nucleolus|nucleus|thylakoid|magnesium ion binding|manganese ion binding|myosin phosphatase activity|phosphatase activity|dephosphorylation|photosynthetic electron transport chain|photosystem stoichiometry adjustment|protein dephosphorylation
J2O13_01G002369	58.5646	88.7192	28.41	0.320381	-1.64214	6.70E-08	6.04E-07	Down	0.231868	0.289394	0.276835	0.67451	0.669952	0.706513	NFD4	Protein NUCLEAR FUSION DEFECTIVE 4			GO:0016020,GO:0005739,GO:0000741,GO:0010197,GO:0009651	membrane|mitochondrion|karyogamy|polar nucleus fusion|response to salt stress
J2O13_01G002376	106.253	195.351	17.154	0.0875491	-3.51376	1.40E-15	3.74E-14	Down	1.42291	1.4322	0.652405	13.6817	8.45399	10.7201
J2O13_01G002406	70.761	19.9564	121.566	6.07555	2.60302	1.18E-10	1.63E-09	Up	3.13254	2.44103	3.74589	0.259373	0.539148	0.465238	At4g00950	Uncharacterized protein At4g00950			GO:0003700,GO:0009793,GO:0006355	DNA-binding transcription factor activity|embryo development ending in seed dormancy|regulation of DNA-templated transcription
J2O13_01G002412	6362.59	11313.7	1411.52	0.124763	-3.00274	9.87E-13	1.82E-11	Down	24.4124	32.8868	26.1192	224.912	227.976	85.7803
J2O13_01G002413	669.916	1228.9	110.934	0.0902861	-3.46935	1.07E-12	1.96E-11	Down	11.8385	16.9259	16.4504	166.322	179.223	56.7574
J2O13_01G002420	7223.6	12233	2214.16	0.180993	-2.46599	8.28E-69	1.05E-65	Down	24.1049	24.0432	21.3327	107.032	108.148	99.9191		Soluble starch synthase 1, chloroplastic/amyloplastic OS=Solanum tuberosum OX=4113 PE=2 SV=1	ko00500,ko02026	Starch and sucrose metabolism|Biofilm formation - Escherichia coli	GO:0009501,GO:0009507,GO:0033201,GO:0004373,GO:0009011,GO:0010021,GO:0009960,GO:0019252	amyloplast|chloroplast|alpha-1,4-glucan synthase activity|glycogen (starch) synthase activity|starch synthase activity|amylopectin biosynthetic process|endosperm development|starch biosynthetic process
J2O13_01G002434	24.2261	40.9204	7.53188	0.184009	-2.44216	0.00112076	0.00405587	Down	0.197949	0.796968	0.508254	1.7501	3.41219	1.49133
J2O13_01G002443	19.0783	11.4417	26.7149	2.34003	1.22653	0.0144655	0.0369903	Up	1.51259	1.2506	1.61244	0.554644	0.443429	0.542654
J2O13_01G002459	7802.88	10404	5201.74	0.49996	-1.00011	1.64E-07	1.37E-06	Down	65.608	49.2589	54.9021	81.5596	79.9803	120.719	PME34	Probable pectinesterase/pectinesterase inhibitor 34			GO:0009505,GO:0005886,GO:0045330,GO:0030599,GO:0046910,GO:0042545,GO:0045490,GO:0010119	plant-type cell wall|plasma membrane|aspartyl esterase activity|pectinesterase activity|pectinesterase inhibitor activity|cell wall modification|pectin catabolic process|regulation of stomatal movement
J2O13_01G002468	4644.73	2990.44	6299.02	2.10611	1.07458	2.64E-07	2.11E-06	Up	26.6675	28.2562	27.8277	8.74364	8.92612	15.1304	SPK1	Guanine nucleotide exchange factor SPIKE 1			GO:0070971,GO:0005789,GO:0019898,GO:0005634,GO:0005085,GO:0009734,GO:0009958,GO:0043547,GO:0008064,GO:0010928,GO:0008360,GO:0051493,GO:0007264,GO:0016192	endoplasmic reticulum exit site|endoplasmic reticulum membrane|extrinsic component of membrane|nucleus|guanyl-nucleotide exchange factor activity|auxin-activated signaling pathway|positive gravitropism|positive regulation of GTPase activity|regulation of actin polymerization or depolymerization|regulation of auxin mediated signaling pathway|regulation of cell shape|regulation of cytoskeleton orga…
J2O13_01G002472	574.909	358.428	791.39	2.20638	1.14168	1.04E-05	6.14E-05	Up	7.44757	8.84195	10.2244	2.5148	2.82988	4.68039	SCL3	Scarecrow-like protein 3			GO:0005634,GO:0003700,GO:0043565,GO:0006355,GO:0009739	nucleus|DNA-binding transcription factor activity|sequence-specific DNA binding|regulation of DNA-templated transcription|response to gibberellin
J2O13_01G002476	3015.12	4340.13	1690.11	0.389428	-1.36057	5.54E-05	0.000276961	Down	22.3164	35.5484	27.0511	69.1299	69.0887	38.7104	SARED1	Sanguinarine reductase			GO:0016491,GO:0009636	oxidoreductase activity|response to toxic substance
J2O13_01G002482	54699	74851.8	34546.3	0.46153	-1.1155	5.52E-05	0.000276519	Down	87.6599	124.284	92.504	201.266	202.565	133.438	CHR5	Protein CHROMATIN REMODELING 5			GO:0000785,GO:0005634,GO:0009506,GO:0005524,GO:0016887,GO:0140658,GO:0003682,GO:0003677,GO:0004386,GO:0042393,GO:0006338,GO:0034728,GO:0006357	chromatin|nucleus|plasmodesma|ATP binding|ATP hydrolysis activity|ATP-dependent chromatin remodeler activity|chromatin binding|DNA binding|helicase activity|histone binding|chromatin remodeling|nucleosome organization|regulation of transcription by RNA polymerase II
J2O13_01G002486	123.937	32.4418	215.433	6.63773	2.73069	4.35E-11	6.40E-10	Up	9.33001	4.33905	6.43365	0.869404	0.606611	1.03104	At4g18380	F-box protein At4g18380
J2O13_01G002506	908.322	1224.54	592.103	0.483597	-1.04812	0.000573212	0.00224064	Down	9.71636	12.1355	9.91876	20.3736	20.8122	12.1855	CYP94A1	Cytochrome P450 94A1			GO:0005789,GO:0020037,GO:0005506,GO:0004497,GO:0016705	endoplasmic reticulum membrane|heme binding|iron ion binding|monooxygenase activity|oxidoreductase activity, acting on paired donors, with incorporation or reduction of molecular oxygen
J2O13_01G002539	1940.75	1198.83	2682.67	2.23801	1.16222	1.27E-10	1.74E-09	Up	39.9782	31.8844	35.9012	12.0143	15.1508	12.3429	NPC2	Non-specific phospholipase C2	ko00562,ko00564,ko00565,ko02024,ko04919	Inositol phosphate metabolism|Glycerophospholipid metabolism|Ether lipid metabolism|Quorum sensing|Thyroid hormone signaling pathway	GO:0009507,GO:0005576,GO:0005794,GO:0004629,GO:0042742,GO:0048229,GO:0009395,GO:0048364	chloroplast|extracellular region|Golgi apparatus|phospholipase C activity|defense response to bacterium|gametophyte development|phospholipid catabolic process|root development
J2O13_01G002584	271.984	363.774	180.194	0.495343	-1.0135	4.81E-10	6.09E-09	Down	3.22367	3.15509	3.34399	5.34869	4.67823	6.18725	MOC1	Holliday junction resolvase MOC1, chloroplastic			GO:0042644,GO:0008821,GO:0000400,GO:0046872,GO:0006310,GO:0090143	chloroplast nucleoid|crossover junction endodeoxyribonuclease activity|four-way junction DNA binding|metal ion binding|DNA recombination|nucleoid organization
J2O13_01G002612	6812.03	4309.97	9314.08	2.16113	1.11179	0.00325955	0.0102061	Up	89.8662	176.517	123.634	56.2219	59.0968	31.0781	CYP71B10	Cytochrome P450 71B10			GO:0016020,GO:0020037,GO:0005506,GO:0016709	membrane|heme binding|iron ion binding|oxidoreductase activity, acting on paired donors, with incorporation or reduction of molecular oxygen, NAD(P)H as one donor, and incorporation of one atom of oxygen
J2O13_01G002627	119.948	71.4188	168.477	2.36393	1.24119	4.40E-06	2.79E-05	Up	9.55234	9.89422	8.87663	3.37371	3.73813	2.69641	SAUR20	Auxin-responsive protein SAUR20	ko04075	Plant hormone signal transduction	GO:0005886,GO:0009734,GO:0009733	plasma membrane|auxin-activated signaling pathway|response to auxin
J2O13_01G002632	80.0019	48.8872	111.117	2.28116	1.18977	0.000166864	0.000749269	Up	2.27561	2.4719	2.84189	1.11808	0.813746	0.792142	NFYC1	Nuclear transcription factor Y subunit C-1			GO:0016602,GO:0005829,GO:0005634,GO:0003677,GO:0001228,GO:0003700,GO:0046982,GO:0045893,GO:2000306,GO:0006355	CCAAT-binding factor complex|cytosol|nucleus|DNA binding|DNA-binding transcription activator activity, RNA polymerase II-specific|DNA-binding transcription factor activity|protein heterodimerization activity|positive regulation of DNA-templated transcription|positive regulation of photomorphogenesis|regulation of DNA-templated transcription
J2O13_01G002637	1318.12	1795.99	840.252	0.46794	-1.09561	5.64E-11	8.17E-10	Down	9.82464	9.84215	9.81662	17.922	18.3543	15.2943
J2O13_01G002641	181.702	32.9618	330.442	9.97798	3.31875	5.97E-13	1.15E-11	Up	7.49077	8.85094	13.3702	0.506646	0.558976	1.43751	rpl2-A	50S ribosomal protein L2, chloroplastic	ko03010	Ribosome	GO:0009507,GO:0015934,GO:0019843,GO:0003735,GO:0016740,GO:0006412	chloroplast|large ribosomal subunit|rRNA binding|structural constituent of ribosome|transferase activity|translation
J2O13_01G002642	127.514	43.6207	211.408	4.83476	2.27344	6.13E-09	6.61E-08	Up	16.4887	19.8956	27.3528	3.14447	2.36448	5.48781	rps19	30S ribosomal protein S19, chloroplastic	ko03010	Ribosome	GO:0009507,GO:0015935,GO:0019843,GO:0003735,GO:0006412	chloroplast|small ribosomal subunit|rRNA binding|structural constituent of ribosome|translation
J2O13_01G002662	25166	41430.8	8901.23	0.214846	-2.21863	6.64E-07	4.95E-06	Down	214.425	440.491	286.913	1371.53	1563.57	606.294	pKIWI504	Metallothionein-like protein type 2			GO:0046872	metal ion binding
J2O13_01G002686	85.3602	38.4846	132.236	3.44044	1.78259	0.000201376	0.000882222	Up	1.41019	0.509728	1.20776	0.266641	0.243019	0.234789
J2O13_01G002690	7555.01	3859.02	11251	2.91536	1.54367	3.41E-38	6.75E-36	Up	234.026	199.272	207.779	57.6115	54.3911	69.8001	EXPA4	Expansin-A4			GO:0005576,GO:0016020,GO:0009505,GO:0009506,GO:0009664,GO:0006949	extracellular region|membrane|plant-type cell wall|plasmodesma|plant-type cell wall organization|syncytium formation
J2O13_01G002699	206.061	377.552	34.5699	0.0916613	-3.44754	5.91E-49	2.57E-46	Down	0.514668	0.385201	0.482842	4.07604	4.23544	4.08735	SCL14	Scarecrow-like protein 14			GO:0005829,GO:0005634,GO:0003700,GO:0043565,GO:0000976,GO:0045893,GO:0006355,GO:0080183,GO:0009410	cytosol|nucleus|DNA-binding transcription factor activity|sequence-specific DNA binding|transcription cis-regulatory region binding|positive regulation of DNA-templated transcription|regulation of DNA-templated transcription|response to photooxidative stress|response to xenobiotic stimulus
J2O13_01G002702	2154.82	1093.04	3216.6	2.94213	1.55686	8.43E-05	0.000404338	Up	43.8548	38.3179	45.1429	6.82725	8.41522	21.4274
J2O13_01G002709	7.44228	13.8849	0.999642	0.0711943	-3.8121	0.0196268	0.0478005	Down	0.177647	0.0894034	0	0.151994	0.43746	2.67674	DVL18	Small polypeptide DEVIL 18			GO:0005886,GO:0008285,GO:0048367	plasma membrane|negative regulation of cell population proliferation|shoot system development
J2O13_01G002711	4.8523	8.70495	0.999642	0.11343	-3.14012	0.0147423	0.037558	Down	0.0233864	0.0117696	0	0.0700325	0.0959827	0.0880954	LAC2	Laccase-2			GO:0048046,GO:0005507,GO:0052716,GO:0016491,GO:0046274,GO:0080022,GO:0009414	apoplast|copper ion binding|hydroquinone:oxygen oxidoreductase activity|oxidoreductase activity|lignin catabolic process|primary root development|response to water deprivation
J2O13_01G002718	1394.87	1886.45	903.296	0.478719	-1.06275	3.15E-09	3.54E-08	Down	18.5392	17.4433	16.5015	26.6503	25.2369	39.296
J2O13_01G002726	500.505	288.541	712.469	2.47008	1.30456	0.0128385	0.0333759	Up	2.65538	1.77258	3.01045	0.762213	1.32134	0.336877	SIT2	L-type lectin-domain containing receptor kinase SIT2			GO:0005886,GO:0005524,GO:0030246,GO:0106310,GO:0004675,GO:1901001,GO:0006468	plasma membrane|ATP binding|carbohydrate binding|protein serine kinase activity|transmembrane receptor protein serine/threonine kinase activity|negative regulation of response to salt stress|protein phosphorylation
J2O13_01G002736	136.807	80.0795	193.535	2.41116	1.26973	0.00563859	0.0164467	Up	3.08972	2.95123	3.20261	0.620425	0.698741	1.92661	At2g29260	Tropinone reductase homolog At2g29260, chloroplastic	ko00960	Tropane, piperidine and pyridine alkaloid biosynthesis	GO:0009507,GO:0016491	chloroplast|oxidoreductase activity
J2O13_01G002739	1839.94	743.323	2936.56	3.9496	1.98171	1.47E-37	2.81E-35	Up	42.2277	52.0301	43.4182	8.20409	10.007	10.5943	SDR	Tropinone reductase homolog At2g29360	ko00960	Tropane, piperidine and pyridine alkaloid biosynthesis	GO:0016491	oxidoreductase activity
J2O13_01G002758	1719.78	1014.22	2425.34	2.3917	1.25803	0.00306957	0.00969644	Up	14.2381	15.4318	10.0134	5.51667	5.64365	2.23873
J2O13_01G002765	2448.36	1534.51	3362.21	2.1914	1.13186	6.91E-06	4.21E-05	Up	18.8122	20.4612	17.8754	7.47606	8.47227	5.2978	GSTU7	Glutathione S-transferase U7	ko00480,ko00980,ko00982,ko00983,ko04212,ko05200,ko05204,ko05207,ko05208,ko05225,ko05418,ko01524	Glutathione metabolism|Metabolism of xenobiotics by cytochrome P450|Drug metabolism - cytochrome P450|Drug metabolism - other enzymes|Longevity regulating pathway - worm|Pathways in cancer|Chemical carcinogenesis - DNA adducts|Chemical carcinogenesis - receptor activation|Chemical carcinogenesis - reactive oxygen species|Hepatocellular carcinoma|Fluid shear stress and atherosclerosis|Platinum dru…	GO:0005737,GO:0005829,GO:0004364,GO:0006749,GO:0009751,GO:0009407	cytoplasm|cytosol|glutathione transferase activity|glutathione metabolic process|response to salicylic acid|toxin catabolic process
J2O13_01G002766	2160.22	77.964	4242.47	54.4582	5.76708	2.19E-19	9.13E-18	Up	89.197	30.1079	113.469	1.01817	1.98323	0.422613	GSTU7	Glutathione S-transferase U7	ko00480,ko00980,ko00982,ko00983,ko04212,ko05200,ko05204,ko05207,ko05208,ko05225,ko05418,ko01524	Glutathione metabolism|Metabolism of xenobiotics by cytochrome P450|Drug metabolism - cytochrome P450|Drug metabolism - other enzymes|Longevity regulating pathway - worm|Pathways in cancer|Chemical carcinogenesis - DNA adducts|Chemical carcinogenesis - receptor activation|Chemical carcinogenesis - reactive oxygen species|Hepatocellular carcinoma|Fluid shear stress and atherosclerosis|Platinum dru…	GO:0005737,GO:0005829,GO:0004364,GO:0006749,GO:0009751,GO:0009407	cytoplasm|cytosol|glutathione transferase activity|glutathione metabolic process|response to salicylic acid|toxin catabolic process
J2O13_01G002773	1002.96	1959.31	46.6066	0.0238137	-5.39206	5.44E-188	4.85E-184	Down	0.526111	0.635456	0.696528	20.6163	19.1959	24.7069	UGT76A2	UDP-glucose iridoid glucosyltransferase			GO:0035251,GO:1900994	UDP-glucosyltransferase activity|(-)-secologanin biosynthetic process
J2O13_01G002775	3.46995	0	6.93989	37.4008	5.225	0.00810731	0.0225157	Up	0.803272	1.48228	0.51562	0	0	0	HSP6834-A	Class I heat shock protein (Fragment)	ko04141	Protein processing in endoplasmic reticulum	GO:0005737,GO:0043621,GO:0051082,GO:0051259,GO:0006457,GO:0009408,GO:0042542,GO:0009651	cytoplasm|protein self-association|unfolded protein binding|protein complex oligomerization|protein folding|response to heat|response to hydrogen peroxide|response to salt stress
J2O13_01G002777	1153.68	1650.75	656.616	0.397844	-1.32973	9.08E-10	1.10E-08	Down	28.5162	41.1189	44.5827	77.4658	82.3257	75.6952	HSP18.5-C	18.5 kDa class I heat shock protein	ko04141	Protein processing in endoplasmic reticulum	GO:0005737,GO:0043621,GO:0051082,GO:0051259,GO:0006457,GO:0009408,GO:0042542,GO:0009651	cytoplasm|protein self-association|unfolded protein binding|protein complex oligomerization|protein folding|response to heat|response to hydrogen peroxide|response to salt stress
J2O13_01G002779	50.6163	19.3611	81.8716	4.22332	2.07838	0.00225515	0.00744183	Up	3.74059	3.40488	0.876918	0.361788	0.667485	0.544565	HSP17.5-M	17.5 kDa class I heat shock protein	ko04141	Protein processing in endoplasmic reticulum	GO:0005737,GO:0043621,GO:0051082,GO:0051259,GO:0006457,GO:0009408,GO:0042542,GO:0009651	cytoplasm|protein self-association|unfolded protein binding|protein complex oligomerization|protein folding|response to heat|response to hydrogen peroxide|response to salt stress
J2O13_01G002782	166.91	296.799	37.0203	0.124867	-3.00153	1.09E-15	2.95E-14	Down	0.386213	0.190048	0.388392	2.04874	1.57101	2.79474	IPCS3	Phosphatidylinositol:ceramide inositolphosphotransferase 3			GO:0005789,GO:0000139,GO:0005886,GO:0005802,GO:0047493,GO:0045140,GO:0033188,GO:0046513,GO:0030148	endoplasmic reticulum membrane|Golgi membrane|plasma membrane|trans-Golgi network|ceramide cholinephosphotransferase activity|inositol phosphoceramide synthase activity|sphingomyelin synthase activity|ceramide biosynthetic process|sphingolipid biosynthetic process
J2O13_01G002801	13883.7	20146.7	7620.75	0.378266	-1.40253	4.91E-07	3.75E-06	Down	182.136	286.591	247.381	557.355	591.394	393.361
J2O13_01G002804	6600.67	8909.67	4291.67	0.481682	-1.05385	1.17E-05	6.82E-05	Down	34.255	60.6778	44.3208	80.2816	73.4289	84.6959	SR45A	Serine/arginine-rich splicing factor SR45a			GO:0016607,GO:0005681,GO:0003723,GO:0006397,GO:0048026,GO:0043484,GO:0009644,GO:0008380	nuclear speck|spliceosomal complex|RNA binding|mRNA processing|positive regulation of mRNA splicing, via spliceosome|regulation of RNA splicing|response to high light intensity|RNA splicing
J2O13_01G002805	11285.3	17240.9	5329.61	0.309125	-1.69374	7.50E-16	2.06E-14	Down	37.12	47.9826	35.4458	114.991	110.351	94.0145		Alpha-glucan phosphorylase, H isozyme OS=Solanum tuberosum OX=4113 PE=1 SV=1	ko00500,ko04217,ko02026,ko04910,ko04922,ko04931	Starch and sucrose metabolism|Necroptosis|Biofilm formation - Escherichia coli|Insulin signaling pathway|Glucagon signaling pathway|Insulin resistance	GO:0005737,GO:0008184,GO:0102250,GO:0030170,GO:0102499,GO:0005980	cytoplasm|glycogen phosphorylase activity|linear malto-oligosaccharide phosphorylase activity|pyridoxal phosphate binding|SHG alpha-glucan phosphorylase activity|glycogen catabolic process
J2O13_01G002815	1025.42	1409.78	641.054	0.454717	-1.13696	6.48E-08	5.85E-07	Down	4.58886	7.02822	6.75966	10.4348	10.1041	12.8704	DIVARICATA	Transcription factor DIVARICATA			GO:0005634,GO:0003677,GO:0048262,GO:0009908	nucleus|DNA binding|determination of dorsal/ventral asymmetry|flower development
J2O13_01G002819	47.3656	94.7312	0	0.00190377	-9.03692	1.26E-06	8.90E-06	Down	0	0	0	0.699776	0.723395	0.0159221
J2O13_01G002821	29993.3	50862.9	9123.58	0.179376	-2.47894	1.93E-13	3.92E-12	Down	49.8927	81.2124	54.8332	328.84	325.491	187.63	THIC	Phosphomethylpyrimidine synthase, chloroplastic	ko00730	Thiamine metabolism	GO:0009507,GO:0009570,GO:0009536,GO:0051539,GO:0016830,GO:0051536,GO:0046872,GO:0019904,GO:0010266,GO:0009228,GO:0009229	chloroplast|chloroplast stroma|plastid|4 iron, 4 sulfur cluster binding|carbon-carbon lyase activity|iron-sulfur cluster binding|metal ion binding|protein domain specific binding|response to vitamin B1|thiamine biosynthetic process|thiamine diphosphate biosynthetic process
J2O13_01G002824	17.1197	5.48049	28.7589	5.27948	2.4004	0.0129696	0.0336727	Up	2.88214	0.595069	2.98854	0.569064	0.121322	0.309313	At2g29640	Josephin-like protein			GO:0004843,GO:0000166,GO:0016579	cysteine-type deubiquitinase activity|nucleotide binding|protein deubiquitination
J2O13_01G002826	12401.7	18475.6	6327.78	0.342495	-1.54585	3.15E-11	4.73E-10	Down	579.248	726.317	555.856	1680.9	1549.33	1207.13
J2O13_01G002827	14180.4	21069.9	7290.83	0.346033	-1.53102	1.16E-05	6.77E-05	Down	47.6063	66.3962	49.4702	156.649	148.771	77.1028	ANTR1	Sodium-dependent phosphate transport protein 1, chloroplastic			GO:0009535,GO:0009579,GO:0005315,GO:0015293,GO:0009416,GO:0009624,GO:0006814	chloroplast thylakoid membrane|thylakoid|inorganic phosphate transmembrane transporter activity|symporter activity|response to light stimulus|response to nematode|sodium ion transport
J2O13_01G002835	9483.1	14917.9	4048.24	0.271368	-1.88168	1.41E-06	9.90E-06	Down	30.2882	47.171	30.1023	130.565	129.626	60.5603
J2O13_01G002837	100.645	148.819	52.4706	0.352333	-1.50499	0.0110075	0.0293178	Down	0.894344	0.343491	0.634509	0.745059	1.08185	2.6794	CDC6B	Cell division control protein 6 homolog B	ko04110,ko04111,ko04113,ko05207	Cell cycle|Cell cycle - yeast|Meiosis - yeast|Chemical carcinogenesis - receptor activation	GO:0005634,GO:0003688,GO:0051301,GO:0006270,GO:0033314	nucleus|DNA replication origin binding|cell division|DNA replication initiation|mitotic DNA replication checkpoint signaling
J2O13_01G002846	1444.46	2116.18	772.732	0.365186	-1.4533	9.70E-05	0.000459966	Down	11.7894	17.9588	16.5509	38.5875	43.8072	20.1683	AMT1-3	Ammonium transporter 1 member 3			GO:0005886,GO:0008519,GO:0097272,GO:0072488	plasma membrane|ammonium transmembrane transporter activity|ammonium homeostasis|ammonium transmembrane transport
J2O13_01G002848	11270.8	18358.6	4183.07	0.227854	-2.13382	0.000837426	0.00313187	Down	38.4908	71.7396	47.7511	248.971	263.267	41.2951	At5g58770	Dehydrodolichyl diphosphate synthase 2	ko00900	Terpenoid backbone biosynthesis	GO:0009507,GO:0009570,GO:0005783,GO:0045547,GO:0002094,GO:0009668,GO:0016094,GO:0006486,GO:0009409	chloroplast|chloroplast stroma|endoplasmic reticulum|dehydrodolichyl diphosphate synthase activity|polyprenyltransferase activity|plastid membrane organization|polyprenol biosynthetic process|protein glycosylation|response to cold
J2O13_01G002854	348.495	491.279	205.711	0.418874	-1.25541	1.84E-07	1.52E-06	Down	5.27208	6.36225	5.5546	12.0681	12.2123	9.24241
J2O13_01G002858	148.78	237.635	59.926	0.252079	-1.98805	5.56E-05	0.000277865	Down	2.01194	1.15408	0.749883	4.3683	5.41617	2.86132	At1g78850	EP1-like glycoprotein 3			GO:0048046,GO:0005794,GO:0005739,GO:0000325,GO:0099503,GO:0030246,GO:0005539,GO:0071456,GO:1904383	apoplast|Golgi apparatus|mitochondrion|plant-type vacuole|secretory vesicle|carbohydrate binding|glycosaminoglycan binding|cellular response to hypoxia|response to sodium phosphate
J2O13_01G002859	61.2535	12.4	110.107	8.79565	3.13679	9.43E-10	1.14E-08	Up	1.34715	1.498	1.43299	0.0987959	0.0631886	0.247021	At1g78850	EP1-like glycoprotein 3			GO:0048046,GO:0005794,GO:0005739,GO:0000325,GO:0099503,GO:0030246,GO:0005539,GO:0071456,GO:1904383	apoplast|Golgi apparatus|mitochondrion|plant-type vacuole|secretory vesicle|carbohydrate binding|glycosaminoglycan binding|cellular response to hypoxia|response to sodium phosphate
J2O13_01G002866	18.5266	2.94721	34.1059	11.4145	3.51279	1.92E-06	1.31E-05	Up	0.776997	0.543105	0.914383	0.036933	0.0354329	0.0903367	CCR3	Putative serine/threonine-protein kinase-like protein CCR3			GO:0016020,GO:0005524,GO:0042803,GO:0106310,GO:0004674,GO:0006468	membrane|ATP binding|protein homodimerization activity|protein serine kinase activity|protein serine/threonine kinase activity|protein phosphorylation
J2O13_01G002871	83.1097	27.9325	138.287	4.9321	2.3022	8.65E-16	2.36E-14	Up	6.55118	6.16701	7.03388	0.887147	1.04455	1.38086	PSY3	Protein PSY3			GO:0005576,GO:0008083	extracellular region|growth factor activity
J2O13_01G002879	1729.83	994.147	2465.51	2.4806	1.31069	3.29E-08	3.14E-07	Up	35.0531	23.8115	28.439	10.1304	10.5441	8.07201
J2O13_02G002916	29.2581	3.71489	54.8014	14.7894	3.88649	2.21E-06	1.49E-05	Up	1.04885	0.434009	0.448837	0.019942	0.0669619	0.0195109
J2O13_02G002922	25.5863	2.05684	49.1157	24.098	4.59084	5.18E-05	0.000260642	Up	0.500321	0.257935	1.06921	0.0104408	0.0500834	0
J2O13_02G002925	396.374	586.997	205.752	0.350466	-1.51265	0.0063522	0.0182004	Down	2.30352	2.65995	3.86439	4.00222	3.30604	14.1841	WAV3	E3 ubiquitin-protein ligase WAV3			GO:0046872,GO:0061630,GO:0009630,GO:0010274,GO:0016567,GO:0048364	metal ion binding|ubiquitin protein ligase activity|gravitropism|hydrotropism|protein ubiquitination|root development
J2O13_02G002938	570.814	958.48	183.149	0.19108	-2.38775	4.97E-12	8.35E-11	Down	7.06479	7.25754	5.85561	30.1918	37.2157	18.321
J2O13_02G002943	857.141	566.255	1148.03	2.027	1.01934	5.97E-07	4.49E-06	Up	3.609	5.27131	4.59466	1.53563	1.93782	2.01839	TIC214	Protein TIC 214			GO:0009706,GO:0015031	chloroplast inner membrane|protein transport
J2O13_02G002944	355.041	115.244	594.838	5.16192	2.36791	6.13E-20	2.68E-18	Up	8.38493	9.07544	11.023	1.6618	1.0499	1.85059	rpoA	DNA-directed RNA polymerase subunit alpha	ko03020	RNA polymerase	GO:0009507,GO:0005737,GO:0000428,GO:0003677,GO:0003899,GO:0046983,GO:0006351	chloroplast|cytoplasm|DNA-directed RNA polymerase complex|DNA binding|DNA-directed 5'-3' RNA polymerase activity|protein dimerization activity|DNA-templated transcription
J2O13_02G002945	753.708	297.071	1210.35	4.07326	2.02618	1.91E-35	3.18E-33	Up	21.0166	25.1532	27.8291	4.65937	4.61912	5.72364	rps3	30S ribosomal protein S3, chloroplastic	ko03010	Ribosome	GO:0009507,GO:1990904,GO:0005840,GO:0019843,GO:0003735,GO:0006412	chloroplast|ribonucleoprotein complex|ribosome|rRNA binding|structural constituent of ribosome|translation
J2O13_02G002946	6.8345	1.34197	12.327	9.2021	3.20196	0.00488686	0.0145325	Up	0.505542	0.462585	0.752267	0.0786435	0	0.0769435	rpl2-A	50S ribosomal protein L2, chloroplastic			GO:0009507,GO:0015934,GO:0019843,GO:0003735,GO:0016740,GO:0006412	chloroplast|large ribosomal subunit|rRNA binding|structural constituent of ribosome|transferase activity|translation
J2O13_02G002948	89.5481	134.446	44.6499	0.332357	-1.58919	1.01E-09	1.22E-08	Down	4.06896	5.20243	5.61197	11.5732	12.0961	13.2563
J2O13_02G002963	15.9982	5.51039	26.4861	4.85826	2.28044	0.0018851	0.00637059	Up	0.90565	1.50408	1.22081	0.348691	0.111509	0.151624	rpl16	50S ribosomal protein L16, chloroplastic			GO:0009507,GO:1990904,GO:0005840,GO:0019843,GO:0003735,GO:0006412	chloroplast|ribonucleoprotein complex|ribosome|rRNA binding|structural constituent of ribosome|translation
J2O13_02G002974	28.8744	12.6322	45.1166	3.56257	1.83292	0.00187026	0.00632523	Up	3.69505	9.91782	7.41204	1.31728	1.51653	2.06208	ndhA	NAD(P)H-quinone oxidoreductase subunit 1, chloroplastic	ko00190	Oxidative phosphorylation	GO:0009535,GO:0016655,GO:0048038,GO:0019684	chloroplast thylakoid membrane|oxidoreductase activity, acting on NAD(P)H, quinone or similar compound as acceptor|quinone binding|photosynthesis, light reaction
J2O13_02G002985	8.23503	1.57534	14.8947	9.17279	3.19736	0.00583165	0.0169295	Up	0.610192	0.614177	1.07713	0	0.0417393	0.170264
J2O13_02G002991	484.614	300.376	668.851	2.22719	1.15523	1.29E-20	6.05E-19	Up	8.69159	9.57957	9.15081	3.26649	3.28939	3.59253	2024-10-07	Organic cation/carnitine transporter 7			GO:0005886,GO:0005524,GO:0090417,GO:0090416,GO:2001143,GO:2001142	plasma membrane|ATP binding|N-methylnicotinate transmembrane transporter activity|nicotinate transmembrane transporter activity|N-methylnicotinate transport|nicotinate transport
J2O13_02G003029	122.324	9.38992	235.258	25.0553	4.64704	1.12E-15	3.02E-14	Up	4.07137	1.55583	4.23904	0.0708496	0.158601	0.0924241	CYP716A44	Beta-amyrin 28-monooxygenase			GO:0016020,GO:0020037,GO:0005506,GO:0004497,GO:0016491,GO:0016712,GO:0102374,GO:0102373,GO:0016125	membrane|heme binding|iron ion binding|monooxygenase activity|oxidoreductase activity|oxidoreductase activity, acting on paired donors, with incorporation or reduction of molecular oxygen, reduced flavin or flavoprotein as one donor, and incorporation of one atom of oxygen|ursolic aldehyde 28-monooxygenase activity|uvaol dehydrogenase activity|sterol metabolic process
J2O13_02G003046	1649.15	2448.18	850.124	0.347278	-1.52584	4.75E-10	6.02E-09	Down	34.2765	29.5088	30.089	78.7143	85.2747	56.2257	At1g28150	UPF0426 protein At1g28150, chloroplastic			GO:0010287	plastoglobule
J2O13_02G003061	16.9937	28.9898	4.99758	0.171559	-2.54323	0.00373834	0.0115288	Down	0.0587636	0.106465	0.0113161	0.392167	0.212237	0.236117
J2O13_02G003067	648.153	899.482	396.824	0.441142	-1.18068	1.12E-05	6.55E-05	Down	3.31833	6.30486	4.81574	8.76433	8.62545	9.60144	CHUP1	Protein CHUP1, chloroplastic			GO:0009507,GO:0009707,GO:0005829,GO:0009658,GO:0009902	chloroplast|chloroplast outer membrane|cytosol|chloroplast organization|chloroplast relocation
J2O13_02G003083	11.043	1.96714	20.119	10.0824	3.33376	0.000377509	0.00155123	Up	1.52622	2.3447	1.00546	0.0687276	0.131872	0.201726	rps2	30S ribosomal protein S2, chloroplastic	ko03010	Ribosome	GO:0009507,GO:0015935,GO:0003735,GO:0006412	chloroplast|small ribosomal subunit|structural constituent of ribosome|translation
J2O13_02G003093	2650.15	3534.55	1765.75	0.499593	-1.00117	2.57E-06	1.72E-05	Down	34.6793	36.8268	30.469	62.2822	58.1074	46.365	FKFBP	6-phosphofructo-2-kinase/fructose-2,6-bisphosphatase	ko00051,ko04066,ko04152	Fructose and mannose metabolism|HIF-1 signaling pathway|AMPK signaling pathway	GO:0005829,GO:0016020,GO:0003873,GO:0005524,GO:0004331,GO:2001070,GO:0006003,GO:0006002,GO:0006000,GO:0043609	cytosol|membrane|6-phosphofructo-2-kinase activity|ATP binding|fructose-2,6-bisphosphate 2-phosphatase activity|starch binding|fructose 2,6-bisphosphate metabolic process|fructose 6-phosphate metabolic process|fructose metabolic process|regulation of carbon utilization
J2O13_02G003122	253.577	410.273	96.882	0.23591	-2.08369	3.79E-08	3.57E-07	Down	1.66945	1.29051	0.951599	3.18813	3.70544	7.04339	FBL8	Putative F-box/LRR-repeat protein 8			GO:0019005,GO:0004842,GO:0031146	SCF ubiquitin ligase complex|ubiquitin-protein transferase activity|SCF-dependent proteasomal ubiquitin-dependent protein catabolic process
J2O13_02G003212	11.6783	0.677976	22.6787	33.6832	5.07396	0.000151039	0.000683378	Up	4.03097	2.6626	1.94061	0	0.206799	0	CCT1	T-complex protein 1 subunit alpha			GO:0005832,GO:0005829,GO:0005524,GO:0016887,GO:0140662,GO:0051082,GO:0006457	chaperonin-containing T-complex|cytosol|ATP binding|ATP hydrolysis activity|ATP-dependent protein folding chaperone|unfolded protein binding|protein folding
J2O13_02G003225	167.133	47.228	287.039	6.06781	2.60118	4.17E-07	3.24E-06	Up	2.54897	8.4106	5.68359	0.541123	0.676459	1.07489	At2g31550	GDSL esterase/lipase At2g31550			GO:0005576,GO:0016788,GO:0016042	extracellular region|hydrolase activity, acting on ester bonds|lipid catabolic process
J2O13_02G003243	15.553	7.18242	23.9236	3.35533	1.74645	0.00660718	0.0188457	Up	0.566575	0.694247	0.521808	0.168612	0.181983	0.0824834	ndhH	NAD(P)H-quinone oxidoreductase subunit H, chloroplastic			GO:0009535,GO:0051287,GO:0016655,GO:0048038,GO:0019684	chloroplast thylakoid membrane|NAD binding|oxidoreductase activity, acting on NAD(P)H, quinone or similar compound as acceptor|quinone binding|photosynthesis, light reaction
J2O13_02G003244	31.3644	1.57534	61.1534	37.1365	5.21477	4.57E-09	4.99E-08	Up	0.566178	0.809822	0.459068	0	0.00815337	0.0332594	TIC214	Protein TIC 214			GO:0009706,GO:0015031	chloroplast inner membrane|protein transport
J2O13_02G003250	58.4851	5.54028	111.43	20.4456	4.35372	2.84E-12	4.97E-11	Up	1.28202	0.679155	1.29936	0.0742258	0.0316493	0.0242071
J2O13_02G003255	24537	728.652	48345.3	66.3561	6.05216	5.78E-56	4.12E-53	Up	827.83	432.455	827.444	7.32753	12.2614	5.96634	WAV3	E3 ubiquitin-protein ligase WAV3			GO:0046872,GO:0061630,GO:0009630,GO:0010274,GO:0016567,GO:0048364	metal ion binding|ubiquitin protein ligase activity|gravitropism|hydrotropism|protein ubiquitination|root development
J2O13_02G003258	15211.7	2152.97	28270.3	13.1304	3.71484	1.84E-44	5.96E-42	Up	320.756	177.04	309.991	13.7368	18.3189	18.6817
J2O13_02G003282	2821.93	4120.54	1523.32	0.369716	-1.43551	4.44E-09	4.86E-08	Down	28.7985	31.3508	30.9215	74.9329	75.4051	50.0981	At2g30170	Probable protein phosphatase 2C 26			GO:0009507,GO:0009570,GO:0046872,GO:0017018,GO:0071482,GO:0035970,GO:0010027	chloroplast|chloroplast stroma|metal ion binding|myosin phosphatase activity|cellular response to light stimulus|peptidyl-threonine dephosphorylation|thylakoid membrane organization
J2O13_02G003307	2833.7	149.65	5517.74	36.8486	5.20354	3.11E-38	6.22E-36	Up	57.1234	43.923	21.3339	0.622485	1.01343	1.13193	ASN1	Asparagine synthetase [glutamine-hydrolyzing] 1	ko00250	Alanine, aspartate and glutamate metabolism	GO:0005829,GO:0004066,GO:0005524,GO:0009063,GO:0006529,GO:0043617,GO:0006541,GO:0070981,GO:0009646,GO:0009750,GO:0009749,GO:0009744	cytosol|asparagine synthase (glutamine-hydrolyzing) activity|ATP binding|amino acid catabolic process|asparagine biosynthetic process|cellular response to sucrose starvation|glutamine metabolic process|L-asparagine biosynthetic process|response to absence of light|response to fructose|response to glucose|response to sucrose
J2O13_02G003384	180.338	65.8409	294.835	4.47921	2.16325	7.71E-05	0.000373945	Up	4.90335	1.31782	5.28971	0.615015	0.811296	0.676935	GSVIVT00023967001	Peroxidase 4			GO:0005576,GO:0020037,GO:0140825,GO:0046872,GO:0042744,GO:0006979	extracellular region|heme binding|lactoperoxidase activity|metal ion binding|hydrogen peroxide catabolic process|response to oxidative stress
J2O13_02G003399	5.6784	0	11.3568	61.2792	5.93733	0.00183614	0.0062264	Up	0.890772	0.149431	0.667084	0	0	0			ko03460	Fanconi anemia pathway
J2O13_02G003413	309.776	137.073	482.48	3.51539	1.81368	3.27E-24	2.11E-22	Up	9.43789	8.64125	10.2628	2.00632	1.94073	2.72541	EPFL6	EPIDERMAL PATTERNING FACTOR-like protein 6			GO:0005576,GO:0010052,GO:0010374	extracellular region|guard cell differentiation|stomatal complex development
J2O13_02G003436	716.079	1242.19	189.972	0.152933	-2.70903	0.000548256	0.00215207	Down	1.31565	2.25799	1.26677	12.007	12.1354	1.04485	WNK4	Probable serine/threonine-protein kinase WNK4			GO:0005737,GO:0005634,GO:0005524,GO:0004672,GO:0106310,GO:0004674,GO:0035556,GO:0046777,GO:0006468	cytoplasm|nucleus|ATP binding|protein kinase activity|protein serine kinase activity|protein serine/threonine kinase activity|intracellular signal transduction|protein autophosphorylation|protein phosphorylation
J2O13_02G003446	9271.23	18214.2	328.276	0.0180231	-5.79401	1.41E-05	8.03E-05	Down	5.67025	21.8842	9.65373	748.375	874.715	16.7544	LSAT_1X82001	Non-specific lipid-transfer protein Lac s 1			GO:0008289,GO:0006869	lipid binding|lipid transport
J2O13_02G003455	273.655	53.1512	494.159	9.28263	3.21453	0.000177826	0.000792497	Up	6.03159	0.807393	4.74552	0.151782	0.132955	0.787702		Probable (S)-tetrahydroprotoberberine N-methyltransferase 2 OS=Papaver bracteatum OX=215227 PE=2 SV=1			GO:0005737,GO:0030782,GO:0032259	cytoplasm|(S)-tetrahydroprotoberberine N-methyltransferase activity|methylation
J2O13_02G003460	27.2239	44.5568	9.89102	0.221909	-2.17196	0.00617415	0.0177846	Down	0.378149	0.869984	0.3641	2.63456	2.4832	0.723539
J2O13_02G003484	593.49	289.997	896.983	3.09511	1.62999	5.77E-05	0.000287806	Up	31.9403	37.6252	36.7838	11.4871	11.5025	4.71833	PTI6	Pathogenesis-related genes transcriptional activator PTI6	ko04626	Plant-pathogen interaction	GO:0005634,GO:0003677,GO:0003700,GO:0006952	nucleus|DNA binding|DNA-binding transcription factor activity|defense response
J2O13_02G003486	70.355	3.15069	137.559	42.3628	5.40473	5.44E-11	7.91E-10	Up	10.8178	4.95483	9.59664	0	0.0997715	0.40699
J2O13_02G003490	1989.2	1258.88	2719.52	2.1599	1.11097	0.0112198	0.0298118	Up	26.6409	22.8489	28.0325	6.17114	5.57312	18.7587	At5g58300	Probable inactive receptor kinase At5g58300			GO:0005886,GO:0005524,GO:0004672,GO:0006468	plasma membrane|ATP binding|protein kinase activity|protein phosphorylation
J2O13_02G003491	3704.98	1996.33	5413.62	2.71166	1.43918	1.07E-38	2.25E-36	Up	68.9751	59.0123	69.6133	18.0538	20.1775	21.8676	RPT2	Root phototropism protein 2			GO:0005737,GO:0005634,GO:0005777,GO:0009904,GO:0009638,GO:0016567,GO:0007165	cytoplasm|nucleus|peroxisome|chloroplast accumulation movement|phototropism|protein ubiquitination|signal transduction
J2O13_02G003507	7480.58	12236.4	2724.79	0.222682	-2.16694	6.75E-17	2.10E-15	Down	42.5184	50.3385	43.275	188.431	187.389	121.547	ndhN	NAD(P)H-quinone oxidoreductase subunit N, chloroplastic			GO:0009507,GO:0009941,GO:0009535,GO:0010598,GO:0009536,GO:0016655,GO:0048038,GO:0050832,GO:0010258	chloroplast|chloroplast envelope|chloroplast thylakoid membrane|NAD(P)H dehydrogenase complex (plastoquinone)|plastid|oxidoreductase activity, acting on NAD(P)H, quinone or similar compound as acceptor|quinone binding|defense response to fungus|NADH dehydrogenase complex (plastoquinone) assembly
J2O13_02G003508	107.285	202.755	11.815	0.0582569	-4.10143	1.73E-05	9.69E-05	Down	0.177932	0.208943	0.142768	3.66639	3.34707	0.198596	CYP714C2	Cytochrome P450 714C2			GO:0016020,GO:0020037,GO:0005506,GO:0004497,GO:0016705	membrane|heme binding|iron ion binding|monooxygenase activity|oxidoreductase activity, acting on paired donors, with incorporation or reduction of molecular oxygen
J2O13_02G003530	1430.15	1975.5	884.799	0.447869	-1.15885	6.25E-13	1.20E-11	Down	32.1887	23.6666	26.2996	48.8646	46.3262	56.2255
J2O13_02G003532	166.468	233.557	99.3783	0.425674	-1.23218	0.00080963	0.00304068	Down	3.58254	2.95031	2.36615	7.42236	5.41964	4.16383
J2O13_02G003547	87.7516	126.238	49.2646	0.389935	-1.3587	1.91E-05	0.000105721	Down	0.380516	0.399299	0.428742	0.77582	0.637978	1.16568	At1g09600	Probable serine/threonine-protein kinase At1g09600			GO:0000307,GO:0005634,GO:0005524,GO:0004693,GO:0008353,GO:0070816,GO:0032968,GO:0006468	cyclin-dependent protein kinase holoenzyme complex|nucleus|ATP binding|cyclin-dependent protein serine/threonine kinase activity|RNA polymerase II CTD heptapeptide repeat kinase activity|phosphorylation of RNA polymerase II C-terminal domain|positive regulation of transcription elongation by RNA polymerase II|protein phosphorylation
J2O13_02G003558	3.93029	0.309089	7.5515	20.899	4.38536	0.00767623	0.0214556	Up	0.497837	0.445411	0.319561	0	0	0.0463043	ERF020	Ethylene-responsive transcription factor ERF020			GO:0005634,GO:0003677,GO:0003700,GO:0009873	nucleus|DNA binding|DNA-binding transcription factor activity|ethylene-activated signaling pathway
J2O13_02G003559	6007.49	8165.36	3849.63	0.471469	-1.08477	1.45E-05	8.27E-05	Down	79.3451	94.5112	75.7989	164.143	157.546	109.731
J2O13_02G003561	111.114	156.873	65.355	0.416812	-1.26253	0.014934	0.0379647	Down	0.493471	0.948233	0.7775	1.42017	2.11737	0.769839
J2O13_02G003562	833.988	1129.34	538.633	0.476964	-1.06805	3.11E-12	5.41E-11	Down	3.7387	3.91685	4.21611	6.87682	5.67802	8.01899
J2O13_02G003564	1566.8	2536.09	597.499	0.235605	-2.08556	2.92E-10	3.82E-09	Down	10.0565	12.3281	9.5638	43.4147	43.2761	23.2576
J2O13_02G003594	4071.64	5529.21	2614.07	0.472782	-1.08075	1.66E-07	1.38E-06	Down	21.1994	27.2047	21.0204	42.5176	42.6496	35.0439
J2O13_02G003595	1246.41	1695.66	797.168	0.470289	-1.08838	3.32E-18	1.21E-16	Down	10.3305	10.0968	10.9991	18.9354	18.0381	17.8835
J2O13_02G003600	76.7513	39.3684	114.134	2.89598	1.53405	0.00125473	0.00446475	Up	1.1617	1.98778	1.30496	0.242963	0.614522	0.410592	Os11g0242200	Probable protein phosphatase 2C 74			GO:0046872,GO:0017018,GO:0006470	metal ion binding|myosin phosphatase activity|protein dephosphorylation
J2O13_02G003611	5.07994	0.338988	9.8209	27.19	4.765	0.00226242	0.00746305	Up	0.159346	0.12029	0.11507	0	0.0108998	0	ROQ1	Disease resistance protein Roq1			GO:0043531,GO:0050135,GO:0061809,GO:0006952,GO:0007165	ADP binding|NAD(P)+ nucleosidase activity|NAD+ nucleotidase, cyclic ADP-ribose generating|defense response|signal transduction
J2O13_02G003613	377.851	32.57	723.131	22.0968	4.46577	2.24E-20	1.02E-18	Up	13.1735	6.66031	13.4878	0.246719	0.274071	0.749567	CEL3	Endoglucanase 9	ko00500,ko02020	Starch and sucrose metabolism|Two-component system	GO:0005576,GO:0005794,GO:0009505,GO:0009506,GO:0008810,GO:0071555,GO:0030245	extracellular region|Golgi apparatus|plant-type cell wall|plasmodesma|cellulase activity|cell wall organization|cellulose catabolic process
J2O13_02G003618	7.34609	14.3559	0.336275	0.0244942	-5.35141	0.000977933	0.00359841	Down	0	0.0636846	0	0.703751	1.19452	0.317787
J2O13_02G003625	481.688	201.929	761.447	3.77174	1.91523	2.46E-15	6.41E-14	Up	3.29114	2.27352	2.88335	0.526215	0.733222	0.579195	DSC1	Disease resistance-like protein DSC1			GO:0043531,GO:0005524,GO:0050135,GO:0061809,GO:0042742,GO:0009626,GO:0007165	ADP binding|ATP binding|NAD(P)+ nucleosidase activity|NAD+ nucleotidase, cyclic ADP-ribose generating|defense response to bacterium|plant-type hypersensitive response|signal transduction
J2O13_02G003627	5.45065	10.2523	0.648966	0.0634711	-3.97776	0.00938746	0.0255827	Down	0	0.033326	0.0318798	0.311614	0.0815337	0.471175	GAI	DELLA protein GAI			GO:0005634,GO:0003700,GO:0043565,GO:0009740,GO:0042538,GO:0009867,GO:0009938,GO:0010187,GO:0006355,GO:2000377,GO:2000033,GO:0009737,GO:0009723,GO:0009863	nucleus|DNA-binding transcription factor activity|sequence-specific DNA binding|gibberellic acid mediated signaling pathway|hyperosmotic salinity response|jasmonic acid mediated signaling pathway|negative regulation of gibberellic acid mediated signaling pathway|negative regulation of seed germination|regulation of DNA-templated transcription|regulation of reactive oxygen species metabolic proces…
J2O13_02G003630	770.824	1083.03	458.618	0.423391	-1.23994	6.16E-05	0.000304878	Down	4.49204	8.36383	7.07503	10.7934	10.567	17.9124	CYP71BE52	Salviol synthase			GO:0016020,GO:0020037,GO:0005506,GO:0016712,GO:0016102	membrane|heme binding|iron ion binding|oxidoreductase activity, acting on paired donors, with incorporation or reduction of molecular oxygen, reduced flavin or flavoprotein as one donor, and incorporation of one atom of oxygen|diterpenoid biosynthetic process
J2O13_02G003634	367.7	110.066	625.333	5.68707	2.50769	1.37E-17	4.70E-16	Up	3.93655	2.38684	3.60381	0.456842	0.562897	0.407529	RPV1	Disease resistance protein RPV1			GO:0005737,GO:0005634,GO:0043531,GO:0050135,GO:0061809,GO:0042803,GO:0050832,GO:0043068,GO:0007165	cytoplasm|nucleus|ADP binding|NAD(P)+ nucleosidase activity|NAD+ nucleotidase, cyclic ADP-ribose generating|protein homodimerization activity|defense response to fungus|positive regulation of programmed cell death|signal transduction
J2O13_02G003635	188.854	61.8686	315.839	5.09034	2.34776	3.17E-08	3.04E-07	Up	3.77305	5.93205	4.26652	0.513009	0.516179	1.2854	TPS3	Probable terpene synthase 3	ko00909	Sesquiterpenoid and triterpenoid biosynthesis	GO:0000287,GO:0010333,GO:0016102,GO:0120251	magnesium ion binding|terpene synthase activity|diterpenoid biosynthetic process|hydrocarbon biosynthetic process
J2O13_02G003638	323.512	432.97	214.054	0.494661	-1.01549	0.00726652	0.020484	Down	1.59023	1.99627	2.21071	3.9289	3.63732	1.90703	RPV1	Disease resistance protein RPV1			GO:0005737,GO:0005634,GO:0043531,GO:0050135,GO:0061809,GO:0042803,GO:0050832,GO:0043068,GO:0007165	cytoplasm|nucleus|ADP binding|NAD(P)+ nucleosidase activity|NAD+ nucleotidase, cyclic ADP-ribose generating|protein homodimerization activity|defense response to fungus|positive regulation of programmed cell death|signal transduction
J2O13_02G003646	6856.77	13146.4	567.19	0.0431421	-4.53476	2.72E-16	7.82E-15	Down	2.72538	6.63057	3.1223	101.827	100.317	30.6039	SPS4	Sucrose-phosphate synthase 4	ko00500	Starch and sucrose metabolism	GO:0005829,GO:0016157,GO:0046524,GO:0005986	cytosol|sucrose synthase activity|sucrose-phosphate synthase activity|sucrose biosynthetic process
J2O13_02G003672	2043.58	2858.41	1228.75	0.429926	-1.21784	1.29E-08	1.32E-07	Down	7.82833	9.86435	10.1195	18.5214	19.443	14.8633	ndhI	NAD(P)H-quinone oxidoreductase subunit I, chloroplastic			GO:0009535,GO:0051539,GO:0005506,GO:0008137,GO:0048038,GO:0019684	chloroplast thylakoid membrane|4 iron, 4 sulfur cluster binding|iron ion binding|NADH dehydrogenase (ubiquinone) activity|quinone binding|photosynthesis, light reaction
J2O13_02G003678	37.4387	59.0122	15.8653	0.268124	-1.89903	0.000405087	0.00165046	Down	0.038197	0.0424934	0.0154854	0.0911631	0.117164	0.0858267	At4g27190	Disease resistance protein At4g27190			GO:0043531,GO:0005524,GO:0006952	ADP binding|ATP binding|defense response
J2O13_02G003683	4541.78	6535.44	2548.13	0.389899	-1.35883	3.00E-06	1.98E-05	Down	33.6166	27.0123	22.7168	65.1937	66.726	42.0704	PATL3	Patellin-3			GO:0005737,GO:0005886,GO:0008289,GO:0007049,GO:0051301	cytoplasm|plasma membrane|lipid binding|cell cycle|cell division
J2O13_02G003697	80.8584	0.309089	161.408	447.01	8.80416	4.49E-08	4.17E-07	Up	3.1055	0.138924	1.58524	0	0	0.00825274	RPV1	Disease resistance protein RPV1			GO:0005737,GO:0005634,GO:0043531,GO:0050135,GO:0061809,GO:0042803,GO:0050832,GO:0043068,GO:0007165	cytoplasm|nucleus|ADP binding|NAD(P)+ nucleosidase activity|NAD+ nucleotidase, cyclic ADP-ribose generating|protein homodimerization activity|defense response to fungus|positive regulation of programmed cell death|signal transduction
J2O13_02G003708	356.834	483.511	230.157	0.475953	-1.07111	5.10E-07	3.89E-06	Down	0.748476	1.0951	0.843258	1.58448	1.45044	1.61482	BHLH80	Transcription factor bHLH80			GO:0005634,GO:0000987,GO:0003700,GO:0000981,GO:0046983,GO:0000978,GO:0007623,GO:0042335,GO:0006355,GO:0010468,GO:2000028,GO:0006357,GO:0009409,GO:0009408,GO:0010378	nucleus|cis-regulatory region sequence-specific DNA binding|DNA-binding transcription factor activity|DNA-binding transcription factor activity, RNA polymerase II-specific|protein dimerization activity|RNA polymerase II cis-regulatory region sequence-specific DNA binding|circadian rhythm|cuticle development|regulation of DNA-templated transcription|regulation of gene expression|regulation of phot…
J2O13_02G003711	20.7518	34.0654	7.43817	0.218769	-2.19252	0.000889345	0.00330384	Down	0.292099	0.147003	0.386715	0.593556	1.22881	1.31427	VATG	V-type proton ATPase subunit G	ko00190,ko04150,ko04145,ko04966,ko04721,ko05165,ko05110,ko05120,ko05323	Oxidative phosphorylation|mTOR signaling pathway|Phagosome|Collecting duct acid secretion|Synaptic vesicle cycle|Human papillomavirus infection|Vibrio cholerae infection|Epithelial cell signaling in Helicobacter pylori infection|Rheumatoid arthritis	GO:0016471,GO:0046961	vacuolar proton-transporting V-type ATPase complex|proton-transporting ATPase activity, rotational mechanism
J2O13_02G003713	6881	10037.3	3724.7	0.371098	-1.43013	2.34E-14	5.39E-13	Down	22.3097	25.1778	23.9632	56.2561	56.4616	44.5994	SMXL6	Protein SMAX1-LIKE 6			GO:0005634,GO:1902347	nucleus|response to strigolactone
J2O13_02G003721	197.383	44.7864	349.979	7.79811	2.96312	0.00174343	0.00595053	Up	11.757	4.33471	6.73822	0.239505	0.123726	2.19908	ZHD1	Zinc-finger homeodomain protein 2			GO:0005634,GO:0003677,GO:0003700,GO:0046872,GO:0042803,GO:0000976,GO:0009793,GO:0006355	nucleus|DNA binding|DNA-binding transcription factor activity|metal ion binding|protein homodimerization activity|transcription cis-regulatory region binding|embryo development ending in seed dormancy|regulation of DNA-templated transcription
J2O13_02G003722	2240.82	3500.58	981.062	0.280271	-1.83511	6.85E-09	7.33E-08	Down	17.3968	28.6018	23.6358	79.2373	74.7294	47.9278	ndhT	NAD(P)H-quinone oxidoreductase subunit T, chloroplastic			GO:0009507,GO:0009535,GO:0010598,GO:0048038	chloroplast|chloroplast thylakoid membrane|NAD(P)H dehydrogenase complex (plastoquinone)|quinone binding
J2O13_02G003732	287.481	144.363	430.599	2.9777	1.5742	2.05E-13	4.16E-12	Up	5.91926	5.17009	4.85152	1.13009	1.51586	1.79158
J2O13_02G003748	9247.59	13241.8	5253.32	0.396706	-1.33386	3.41E-12	5.90E-11	Down	102.448	91.7323	85.9872	164.816	163.776	259.843	RPL21	50S ribosomal protein L21, chloroplastic	ko03010	Ribosome	GO:0009507,GO:0009941,GO:0009570,GO:0005634,GO:1990904,GO:0005840,GO:0003729,GO:0019843,GO:0003735,GO:0009658,GO:0009793,GO:0010027,GO:0006412	chloroplast|chloroplast envelope|chloroplast stroma|nucleus|ribonucleoprotein complex|ribosome|mRNA binding|rRNA binding|structural constituent of ribosome|chloroplast organization|embryo development ending in seed dormancy|thylakoid membrane organization|translation
J2O13_02G003749	223.142	47.3577	398.926	8.40716	3.07162	0.00103565	0.00378655	Up	6.71923	5.03264	7.33526	0.215923	0.0647351	1.70324	NAC030	NAC domain-containing protein 30			GO:0005634,GO:0003700,GO:0042802,GO:0046982,GO:0042803,GO:0043565,GO:0000976,GO:0071555,GO:0071365,GO:0050832,GO:0045893,GO:0010628,GO:0090059,GO:0006355,GO:0009737,GO:0009733,GO:0009741,GO:0009735,GO:0009620,GO:0045491,GO:0010089,GO:0048759	nucleus|DNA-binding transcription factor activity|identical protein binding|protein heterodimerization activity|protein homodimerization activity|sequence-specific DNA binding|transcription cis-regulatory region binding|cell wall organization|cellular response to auxin stimulus|defense response to fungus|positive regulation of DNA-templated transcription|positive regulation of gene expression|pro…
J2O13_02G003752	2659.39	4725.85	592.93	0.125449	-2.99483	4.83E-15	1.22E-13	Down	14.5468	17.8928	11.7511	68.8548	62.7591	166.496	SN2	Snakin-2			GO:0005576,GO:0006952	extracellular region|defense response
J2O13_02G003753	41.2751	73.7766	8.77346	0.118896	-3.07223	2.23E-05	0.000121269	Down	0.236458	0.476004	0.546417	1.2948	2.09622	5.62147	GASA2	Gibberellin-regulated protein 2			GO:0005576,GO:0009740	extracellular region|gibberellic acid mediated signaling pathway
J2O13_02G003754	1824	2608.07	1039.93	0.398756	-1.32642	1.01E-16	3.07E-15	Down	11.4319	14.832	13.2933	27.2687	27.7698	26.4374
J2O13_02G003757	197.15	330.4	63.8998	0.193198	-2.37184	7.75E-06	4.69E-05	Down	0.434881	0.307847	0.179453	0.768696	0.925764	2.36025	COMT1	Caffeic acid 3-O-methyltransferase	ko00380,ko00940	Tryptophan metabolism|Phenylpropanoid biosynthesis	GO:0047763,GO:0046983,GO:0009809,GO:0032259	caffeate O-methyltransferase activity|protein dimerization activity|lignin biosynthetic process|methylation
J2O13_02G003766	788.172	414.668	1161.68	2.80253	1.48673	2.20E-07	1.80E-06	Up	8.10145	7.75658	8.98958	2.21593	3.22653	1.77813	PXC3	Leucine-rich repeat receptor-like tyrosine-protein kinase PXC3			GO:0005886,GO:0005524,GO:0004714	plasma membrane|ATP binding|transmembrane receptor protein tyrosine kinase activity
J2O13_02G003771	95.6188	51.2508	139.987	2.72697	1.4473	0.00197186	0.00663105	Up	1.17106	0.713594	0.798428	0.259965	0.140291	0.42391	PS1	FHA domain-containing protein PS1			GO:0031965,GO:0051321,GO:0009555	nuclear membrane|meiotic cell cycle|pollen development
J2O13_02G003776	3163.88	1065.03	5262.72	4.94067	2.30471	2.55E-25	1.81E-23	Up	125.005	82.9534	87.5871	13.3474	17.1599	19.0215	SUC2	Sucrose transport protein SUC2			GO:0016020,GO:0005634,GO:0005886,GO:0005773,GO:0008506,GO:0005985	membrane|nucleus|plasma membrane|vacuole|sucrose:proton symporter activity|sucrose metabolic process
J2O13_02G003796	28935.5	41391.2	16479.8	0.398147	-1.32863	1.08E-11	1.73E-10	Down	122.179	155.779	116.642	282.927	284.157	245.423	ATPD	ATP synthase delta chain, chloroplastic			GO:0009535,GO:0045261,GO:0046933,GO:0009773,GO:0009772,GO:0015986	chloroplast thylakoid membrane|proton-transporting ATP synthase complex, catalytic core F(1)|proton-transporting ATP synthase activity, rotational mechanism|photosynthetic electron transport in photosystem I|photosynthetic electron transport in photosystem II|proton motive force-driven ATP synthesis
J2O13_02G003798	33.8685	20.0422	47.6947	2.36871	1.2441	0.0187012	0.0459418	Up	0.869321	1.5909	1.34431	0.315546	0.324352	0.705656
J2O13_02G003801	2360.58	673.115	4048.05	6.01489	2.58854	5.45E-10	6.82E-09	Up	18.9572	13.2947	38.7632	3.52388	3.49895	2.55082	LAC9	Putative laccase-9			GO:0048046,GO:0005507,GO:0052716,GO:0016491,GO:0046274	apoplast|copper ion binding|hydroquinone:oxygen oxidoreductase activity|oxidoreductase activity|lignin catabolic process
J2O13_02G003802	42.1412	12.8505	71.4319	5.57112	2.47797	2.25E-06	1.52E-05	Up	1.91351	3.48673	1.71536	0.366956	0.379132	0.303789
J2O13_02G003811	2353.18	3526.49	1179.86	0.334584	-1.57956	1.18E-06	8.42E-06	Down	7.84941	11.0173	8.77271	26.9166	25.4865	14.593	At1g71810	Uncharacterized aarF domain-containing protein kinase At1g71810, chloroplastic			GO:0009507,GO:0010287,GO:0005524,GO:0004672,GO:0006468	chloroplast|plastoglobule|ATP binding|protein kinase activity|protein phosphorylation
J2O13_02G003814	8.07087	13.8298	2.31198	0.165873	-2.59185	0.00913579	0.0249978	Down	0.0907876	0.0456902	0.0218537	0.135935	0.298089	0.360992
J2O13_02G003821	3.55864	0.309089	6.8082	18.8696	4.23799	0.0161265	0.0405737	Up	0.0848643	0.0284728	0.0817115	0	0	0.00789332	WRKY51	Probable WRKY transcription factor 51			GO:0005634,GO:0003700,GO:0043565,GO:0042742,GO:0050832,GO:0009867	nucleus|DNA-binding transcription factor activity|sequence-specific DNA binding|defense response to bacterium|defense response to fungus|jasmonic acid mediated signaling pathway
J2O13_02G003829	2367.98	3286.85	1449.12	0.440919	-1.18141	3.55E-06	2.29E-05	Down	34.6078	31.1176	31.8872	65.995	69.9233	44.1813	RUB1	Ubiquitin-NEDD8-like protein RUB1			GO:0005737,GO:0005634,GO:0003729	cytoplasm|nucleus|mRNA binding
J2O13_02G003837	2355.98	3342.77	1369.18	0.409666	-1.28748	6.60E-24	4.08E-22	Down	13.6803	12.1215	13.6946	27.7918	25.1235	26.2507	PDE338	Protein PIGMENT DEFECTIVE 338, chloroplastic	ko03010	Ribosome	GO:0009507,GO:0005739,GO:0009536,GO:0034336,GO:0003729,GO:0003723,GO:0140691,GO:0010196,GO:0009657,GO:0032544,GO:0045727,GO:0009416,GO:0043489	chloroplast|mitochondrion|plastid|misfolded RNA binding|mRNA binding|RNA binding|RNA folding chaperone|nonphotochemical quenching|plastid organization|plastid translation|positive regulation of translation|response to light stimulus|RNA stabilization
J2O13_02G003851	75.7481	27.1046	124.392	4.60319	2.20263	5.19E-08	4.75E-07	Up	10.3688	5.69263	7.62381	1.72053	1.1864	1.31511	SAUR63	Auxin-responsive protein SAUR63			GO:0005886,GO:0009926,GO:0009734,GO:0080086	plasma membrane|auxin polar transport|auxin-activated signaling pathway|stamen filament development
J2O13_02G003855	80.2923	6.50444	154.08	23.9941	4.58461	1.69E-20	7.80E-19	Up	13.6311	21.6574	17.2466	0.77109	0.647298	0.377211	GI	Protein GIGANTEA			GO:0005634,GO:0030154,GO:0009908,GO:0042752,GO:0048586,GO:0048511	nucleus|cell differentiation|flower development|regulation of circadian rhythm|regulation of long-day photoperiodism, flowering|rhythmic process
J2O13_02G003869	6965.52	9490.42	4440.61	0.467914	-1.09568	2.01E-06	1.37E-05	Down	24.871	31.7514	26.5939	52.677	53.6731	38.7626	OHP2	Light-harvesting complex-like protein OHP2, chloroplastic			GO:0009507,GO:0009534,GO:0009535,GO:0005634,GO:0010207,GO:0009642	chloroplast|chloroplast thylakoid|chloroplast thylakoid membrane|nucleus|photosystem II assembly|response to light intensity
J2O13_02G003871	52.9197	74.4957	31.3437	0.421589	-1.24609	0.00922827	0.0252199	Down	0.347917	0.296313	0.63133	0.950272	0.549201	0.99694	At1g54610	Probable serine/threonine-protein kinase At1g54610			GO:0000307,GO:0005634,GO:0005524,GO:0004693,GO:0106310,GO:0008353,GO:0070816,GO:0032968,GO:0006468	cyclin-dependent protein kinase holoenzyme complex|nucleus|ATP binding|cyclin-dependent protein serine/threonine kinase activity|protein serine kinase activity|RNA polymerase II CTD heptapeptide repeat kinase activity|phosphorylation of RNA polymerase II C-terminal domain|positive regulation of transcription elongation by RNA polymerase II|protein phosphorylation
J2O13_02G003875	12051.4	4620.65	19482.2	4.21651	2.07605	4.43E-18	1.60E-16	Up	137.225	85.598	97.1965	21.7293	21.8797	18.517	PER12	Peroxidase 12	ko00940	Phenylpropanoid biosynthesis	GO:0005576,GO:0005739,GO:0009505,GO:0000325,GO:0009506,GO:0020037,GO:0140825,GO:0046872,GO:0004601,GO:0042744,GO:0006979	extracellular region|mitochondrion|plant-type cell wall|plant-type vacuole|plasmodesma|heme binding|lactoperoxidase activity|metal ion binding|peroxidase activity|hydrogen peroxide catabolic process|response to oxidative stress
J2O13_02G003876	1706.17	209.44	3202.9	15.2805	3.93362	4.35E-16	1.23E-14	Up	108.264	44.5104	98.8355	2.39103	3.54706	7.97108	PER12	Peroxidase 12	ko00940	Phenylpropanoid biosynthesis	GO:0005576,GO:0005739,GO:0009505,GO:0000325,GO:0009506,GO:0020037,GO:0140825,GO:0046872,GO:0004601,GO:0042744,GO:0006979	extracellular region|mitochondrion|plant-type cell wall|plant-type vacuole|plasmodesma|heme binding|lactoperoxidase activity|metal ion binding|peroxidase activity|hydrogen peroxide catabolic process|response to oxidative stress
J2O13_02G003881	58.3951	13.9905	102.8	7.29917	2.86773	0.00100167	0.00367582	Up	3.60041	1.40815	1.38666	0.0704113	0.101327	0.585559	ERF110	Ethylene-responsive transcription factor ERF110			GO:0005634,GO:0003677,GO:0003700,GO:0009873,GO:0045893,GO:0048510	nucleus|DNA binding|DNA-binding transcription factor activity|ethylene-activated signaling pathway|positive regulation of DNA-templated transcription|regulation of timing of transition from vegetative to reproductive phase
J2O13_02G003892	5082	8306.88	1857.11	0.223556	-2.16129	7.63E-10	9.34E-09	Down	39.58	99.5612	54.999	244.274	228.274	243.222	ASR1	Abscisic stress-ripening protein 1			GO:0005634,GO:0032991,GO:0042802,GO:0043167,GO:0003676,GO:0008270,GO:0009414,GO:0010043	nucleus|protein-containing complex|identical protein binding|ion binding|nucleic acid binding|zinc ion binding|response to water deprivation|response to zinc ion
J2O13_02G003893	40739.9	25200.7	56279	2.2332	1.15912	3.50E-08	3.32E-07	Up	1510.28	1632.88	2049.4	522.319	552.342	860.1	ASR2	Abscisic stress-ripening protein 2
J2O13_02G003894	7414.37	9999.14	4829.61	0.483006	-1.04989	4.38E-16	1.23E-14	Down	143.729	157.692	137.493	252.832	250.671	243.094	At1g43560	Thioredoxin Y2, chloroplastic			GO:0009507,GO:0009570,GO:0005737,GO:0005634,GO:0008047,GO:0016491,GO:0016671,GO:0015035,GO:0043085,GO:0009416	chloroplast|chloroplast stroma|cytoplasm|nucleus|enzyme activator activity|oxidoreductase activity|oxidoreductase activity, acting on a sulfur group of donors, disulfide as acceptor|protein-disulfide reductase activity|positive regulation of catalytic activity|response to light stimulus
J2O13_02G003908	105.822	165.853	45.792	0.276077	-1.85686	0.00116916	0.0041977	Down	0.956186	0.862868	0.460331	2.87748	2.7606	1.02123
J2O13_02G003911	14213.9	21531.2	6896.6	0.320307	-1.64247	2.10E-11	3.24E-10	Down	74.6376	119.047	87.4052	257.536	251.653	209.136		Fructose-1,6-bisphosphatase, cytosolic OS=Solanum tuberosum OX=4113 PE=2 SV=1	ko00010,ko00030,ko00051,ko00710,ko00680,ko04152,ko04910,ko04922	Glycolysis / Gluconeogenesis|Pentose phosphate pathway|Fructose and mannose metabolism|Carbon fixation in photosynthetic organisms|Methane metabolism|AMPK signaling pathway|Insulin signaling pathway|Glucagon signaling pathway	GO:0005737,GO:0005829,GO:0042132,GO:0046872,GO:0030388,GO:0006002,GO:0006000,GO:0006094,GO:0005986	cytoplasm|cytosol|fructose 1,6-bisphosphate 1-phosphatase activity|metal ion binding|fructose 1,6-bisphosphate metabolic process|fructose 6-phosphate metabolic process|fructose metabolic process|gluconeogenesis|sucrose biosynthetic process
J2O13_02G003922	4512.59	2271.84	6753.34	2.97214	1.5715	6.55E-17	2.04E-15	Up	76.722	95.8359	85.7175	19.7123	21.2756	31.3401	SDC	Serine decarboxylase	ko00564	Glycerophospholipid metabolism	GO:0005829,GO:0005886,GO:0030170,GO:0102705,GO:0019752,GO:0006580	cytosol|plasma membrane|pyridoxal phosphate binding|serine decarboxylase activity|carboxylic acid metabolic process|ethanolamine metabolic process
J2O13_02G003926	5177.04	820.545	9533.54	11.6188	3.53838	0.0012463	0.00443969	Up	411.389	94.3379	165.858	8.04303	34.4943	3.9151
J2O13_02G003932	94.7937	7.9532	181.634	22.7492	4.50774	8.10E-13	1.52E-11	Up	2.25371	1.01777	1.4439	0.0659861	0.014068	0.0932529	EIX1	Receptor-like protein EIX1			GO:0005886,GO:0050832	plasma membrane|defense response to fungus
J2O13_02G003933	36.1706	2.07974	70.2614	34.4086	5.1047	5.06E-08	4.65E-07	Up	1.22281	0.414326	0.944234	0.0207174	0.0397517	0	EIX1	Receptor-like protein EIX1			GO:0005886,GO:0050832	plasma membrane|defense response to fungus
J2O13_02G003934	19.5531	0.361896	38.7443	107.327	6.74587	3.87E-07	3.02E-06	Up	1.65343	1.01301	1.55739	0.0307536	0	0	EIX2	Receptor-like protein EIX2			GO:0005886,GO:0050832	plasma membrane|defense response to fungus
J2O13_02G003939	36265.4	62312.1	10218.8	0.163994	-2.60829	2.37E-43	6.92E-41	Down	19.6342	24.0671	22.4729	106.621	126.811	96.8929	At3g47570	Probable LRR receptor-like serine/threonine-protein kinase At3g47570			GO:0005886,GO:0005524,GO:0106310,GO:0004674,GO:0006468	plasma membrane|ATP binding|protein serine kinase activity|protein serine/threonine kinase activity|protein phosphorylation
J2O13_02G003941	3911.91	5738.95	2084.88	0.363292	-1.4608	3.48E-10	4.51E-09	Down	13.1648	16.9289	13.3185	36.223	34.8195	26.5224	RGI2	LRR receptor-like serine/threonine-protein kinase RGI2			GO:0005886,GO:0005524,GO:0042277,GO:0001653,GO:0106310,GO:0004674,GO:0010074,GO:0010078,GO:0006468,GO:2000280,GO:0010082,GO:0010449	plasma membrane|ATP binding|peptide binding|peptide receptor activity|protein serine kinase activity|protein serine/threonine kinase activity|maintenance of meristem identity|maintenance of root meristem identity|protein phosphorylation|regulation of root development|regulation of root meristem growth|root meristem growth
J2O13_02G003943	191.527	91.866	291.189	3.17437	1.66647	3.99E-06	2.56E-05	Up	4.83342	7.77599	4.82551	1.93213	1.30081	1.26024	GLTP3	Glycolipid transfer protein 3			GO:0005829,GO:1902387,GO:1902388,GO:0035627,GO:0120009	cytosol|ceramide 1-phosphate binding|ceramide 1-phosphate transfer activity|ceramide transport|intermembrane lipid transfer
J2O13_02G003948	93.4642	12.652	174.276	13.8409	3.79087	5.12E-10	6.44E-09	Up	4.9735	3.41754	4.23618	0.204582	0.451425	0.0800637
J2O13_02G003959	122.098	28.8109	215.386	7.45303	2.89783	0.00485027	0.0144381	Up	2.64967	1.7379	2.70807	0.0185823	0.0802238	0.736315	PIN6	Auxin efflux carrier component 6			GO:0005783,GO:0005789,GO:0005886,GO:0010329,GO:0010315,GO:0010252,GO:0009926,GO:0009734,GO:0010540,GO:0010105,GO:1901332,GO:0048767	endoplasmic reticulum|endoplasmic reticulum membrane|plasma membrane|auxin efflux transmembrane transporter activity|auxin export across the plasma membrane|auxin homeostasis|auxin polar transport|auxin-activated signaling pathway|basipetal auxin transport|negative regulation of ethylene-activated signaling pathway|negative regulation of lateral root development|root hair elongation
J2O13_02G003961	24.6294	0	49.2588	265.724	8.05379	8.26E-10	1.01E-08	Up	1.84753	2.74045	2.66834	0	0	0
J2O13_02G003962	259.572	60.7646	458.379	7.50952	2.90872	8.00E-30	8.91E-28	Up	5.35865	5.78859	5.87978	0.440647	0.563665	0.882773	At1g12700	Putative pentatricopeptide repeat-containing protein At1g12700, mitochondrial			GO:0005739,GO:0090617,GO:0080156	mitochondrion|mitochondrial mRNA 5'-end processing|mitochondrial mRNA modification
J2O13_02G003967	5339.93	7270.12	3409.74	0.469013	-1.0923	7.84E-09	8.27E-08	Down	19.4519	26.822	21.9835	40.3314	42.0646	36.9791	PPD4	PsbP domain-containing protein 4, chloroplastic			GO:0009507,GO:0009570,GO:0009534,GO:0009543,GO:0005829,GO:0019898,GO:0005739,GO:0009654,GO:0009579,GO:0031977,GO:0005509,GO:0015979	chloroplast|chloroplast stroma|chloroplast thylakoid|chloroplast thylakoid lumen|cytosol|extrinsic component of membrane|mitochondrion|photosystem II oxygen evolving complex|thylakoid|thylakoid lumen|calcium ion binding|photosynthesis
J2O13_02G003969	1134.9	502.881	1766.91	3.5121	1.81233	0.000221973	0.000962982	Up	28.2348	35.6281	32.4185	3.57205	4.78592	15.0639	SWEET1	Bidirectional sugar transporter SWEET1			GO:0005783,GO:0005789,GO:0016020,GO:0005886,GO:0051119,GO:0008643,GO:0051260	endoplasmic reticulum|endoplasmic reticulum membrane|membrane|plasma membrane|sugar transmembrane transporter activity|carbohydrate transport|protein homooligomerization
J2O13_02G003974	28255.9	42324.3	14187.5	0.335211	-1.57686	0.000290015	0.00122447	Down	272.364	403.187	312.599	994.366	1013.49	365.761		Thioredoxin M-type, chloroplastic OS=Spinacia oleracea OX=3562 PE=1 SV=2	ko04621,ko05132,ko05012,ko05418	NOD-like receptor signaling pathway|Salmonella infection|Parkinson disease|Fluid shear stress and atherosclerosis	GO:0009507,GO:0015035	chloroplast|protein-disulfide reductase activity
J2O13_02G003979	2855.05	1121.64	4588.46	4.09187	2.03276	2.81E-25	1.99E-23	Up	48.7971	45.0562	44.8599	9.22475	10.702	7.78853	SCL1	Scarecrow-like protein 1			GO:0005634,GO:0003700,GO:0043565,GO:0000976,GO:0006355	nucleus|DNA-binding transcription factor activity|sequence-specific DNA binding|transcription cis-regulatory region binding|regulation of DNA-templated transcription
J2O13_02G003982	2154.25	1194.92	3113.58	2.60597	1.38182	0.00446363	0.0134037	Up	86.7005	92.9504	93.4614	30.5741	42.786	10.8356
J2O13_02G003992	1375.01	789.649	1960.37	2.48177	1.31137	1.89E-08	1.87E-07	Up	29.8898	41.2883	41.2644	10.0901	10.8146	16.8284
J2O13_02G003995	88.9241	165.098	12.7503	0.0771164	-3.69682	0.00438857	0.013205	Down	0.133879	4.85111	0.128905	27.7201	20.2204	5.49142
J2O13_02G003996	447.744	175.778	719.711	4.09172	2.03271	0.000321416	0.0013443	Up	171.365	62.3906	57.4917	13.0582	12.7476	34.5175
J2O13_02G004008	26.8827	0.309089	53.4564	148.114	7.21057	6.39E-07	4.78E-06	Up	8.78332	2.89608	12.9771	0	0	0.126768
J2O13_02G004009	30.986	46.9771	14.9949	0.319708	-1.64517	0.00114339	0.00412292	Down	2.73226	1.17861	2.00438	5.12069	5.66028	4.35652
J2O13_02G004014	273.434	158.183	388.685	2.45424	1.29528	0.0101354	0.0273307	Up	5.54548	5.39174	6.16415	0.881866	1.31077	3.74286	COMT1	Caffeic acid 3-O-methyltransferase	ko00380,ko00940	Tryptophan metabolism|Phenylpropanoid biosynthesis	GO:0047763,GO:0046983,GO:0009809,GO:0032259	caffeate O-methyltransferase activity|protein dimerization activity|lignin biosynthetic process|methylation
J2O13_02G004016	335.982	62.9955	608.968	9.64682	3.27005	2.57E-05	0.000138493	Up	8.93195	13.1993	11.6905	0.219692	0.376372	2.45649	COMT1	Caffeic acid 3-O-methyltransferase	ko00380,ko00940	Tryptophan metabolism|Phenylpropanoid biosynthesis	GO:0047763,GO:0046983,GO:0009809,GO:0032259	caffeate O-methyltransferase activity|protein dimerization activity|lignin biosynthetic process|methylation
J2O13_02G004019	1925.79	2839.5	1012.08	0.356433	-1.4883	2.41E-08	2.35E-07	Down	7.97392	10.2904	7.23644	22.2424	20.9013	15.2192	At1g77260	Probable methyltransferase PMT10			GO:0005737,GO:0000139,GO:0000138,GO:0008168,GO:0032259	cytoplasm|Golgi membrane|Golgi trans cisterna|methyltransferase activity|methylation
J2O13_02G004020	197.995	106.1	289.89	2.72953	1.44865	3.47E-06	2.25E-05	Up	16.5832	20.7804	11.3592	4.23751	4.75057	5.82291	CML44	Probable calcium-binding protein CML44	ko04626	Plant-pathogen interaction	GO:0005509,GO:0071456	calcium ion binding|cellular response to hypoxia
J2O13_02G004023	173.2	99.6507	246.75	2.47172	1.30551	0.000126035	0.000582679	Up	1.76666	1.39337	1.77085	0.315846	0.606034	0.739437	ndhM	NAD(P)H-quinone oxidoreductase subunit M, chloroplastic			GO:0009535,GO:0016655,GO:0048038	chloroplast thylakoid membrane|oxidoreductase activity, acting on NAD(P)H, quinone or similar compound as acceptor|quinone binding
J2O13_02G004024	5117.82	8576.43	1659.2	0.19346	-2.36989	4.06E-14	9.06E-13	Down	37.2241	48.4984	35.4228	196.587	198.767	113.204	ndhM	NAD(P)H-quinone oxidoreductase subunit M, chloroplastic			GO:0009535,GO:0016655,GO:0048038	chloroplast thylakoid membrane|oxidoreductase activity, acting on NAD(P)H, quinone or similar compound as acceptor|quinone binding
J2O13_02G004026	58.0417	32.6771	83.4063	2.55156	1.35138	0.00659276	0.0188079	Up	6.23262	9.40998	12.538	3.33287	1.64443	4.19249
J2O13_02G004027	8143.03	3159.32	13126.7	4.15454	2.05469	1.30E-19	5.52E-18	Up	94.8462	124.032	130.802	18.7552	19.6384	31.7553	STU	Protein kinase STUNTED			GO:0005737,GO:0005886,GO:0005524,GO:0016787,GO:0004674,GO:0009740,GO:0010476,GO:0051781,GO:0006468,GO:0009739	cytoplasm|plasma membrane|ATP binding|hydrolase activity|protein serine/threonine kinase activity|gibberellic acid mediated signaling pathway|gibberellin mediated signaling pathway|positive regulation of cell division|protein phosphorylation|response to gibberellin
J2O13_02G004043	214.877	306.617	123.137	0.401667	-1.31593	0.000648095	0.00249936	Down	2.72417	1.28946	1.47453	4.48519	3.39647	3.29117	At1g11050	Probable receptor-like protein kinase At1g11050			GO:0005886,GO:0005524,GO:0106310,GO:0004674,GO:0006468	plasma membrane|ATP binding|protein serine kinase activity|protein serine/threonine kinase activity|protein phosphorylation
J2O13_02G004045	2846.72	4643.02	1050.42	0.226244	-2.14405	9.60E-08	8.40E-07	Down	9.96777	5.54668	6.53402	31.3616	32.4206	14.9763	AAP3	Amino acid permease 3			GO:0016020,GO:0031965,GO:0005886,GO:0015171,GO:0015174,GO:0015293,GO:0003333,GO:0015802,GO:0006952	membrane|nuclear membrane|plasma membrane|amino acid transmembrane transporter activity|basic amino acid transmembrane transporter activity|symporter activity|amino acid transmembrane transport|basic amino acid transport|defense response
J2O13_02G004046	171.99	258.399	85.5817	0.331258	-1.59397	0.0176065	0.0436742	Down	1.79266	0.306401	0.825034	2.39232	3.31316	1.444	AAP3	Amino acid permease 3			GO:0016020,GO:0031965,GO:0005886,GO:0015171,GO:0015174,GO:0015293,GO:0003333,GO:0015802,GO:0006952	membrane|nuclear membrane|plasma membrane|amino acid transmembrane transporter activity|basic amino acid transmembrane transporter activity|symporter activity|amino acid transmembrane transport|basic amino acid transport|defense response
J2O13_02G004064	2421.94	1232.8	3611.08	2.9299	1.55085	1.05E-14	2.55E-13	Up	35.47	40.5536	39.0876	11.0675	12.104	8.92519	NAC002	NAC domain-containing protein 2			GO:0005634,GO:0003700,GO:0019900,GO:0000976,GO:0071456,GO:0009788,GO:0009611	nucleus|DNA-binding transcription factor activity|kinase binding|transcription cis-regulatory region binding|cellular response to hypoxia|negative regulation of abscisic acid-activated signaling pathway|response to wounding
J2O13_02G004069	2168.63	2905.31	1431.95	0.492909	-1.02061	3.33E-05	0.00017457	Down	17.4631	19.1614	17.1007	32.3959	34.0405	22.3373
J2O13_02G004078	171.186	26.1607	316.21	12.0851	3.59515	1.54E-12	2.78E-11	Up	5.72921	11.3585	3.594	0.427058	0.498779	0.490492	RR4	Two-component response regulator ORR4	ko04075	Plant hormone signal transduction	GO:0005634,GO:0009736,GO:0000160,GO:0009735	nucleus|cytokinin-activated signaling pathway|phosphorelay signal transduction system|response to cytokinin
J2O13_02G004093	57346.5	85454.7	29238.2	0.342148	-1.54731	3.94E-23	2.29E-21	Down	283.066	329.47	277.918	745.872	723.002	665.814	PSBS	Photosystem II 22 kDa protein, chloroplastic	ko00195	Photosynthesis	GO:0009535,GO:0009523,GO:0042802,GO:0051219,GO:0015979	chloroplast thylakoid membrane|photosystem II|identical protein binding|phosphoprotein binding|photosynthesis
J2O13_02G004107	190.491	285.744	95.238	0.333335	-1.58496	0.000162311	0.000730296	Down	1.35119	0.547654	0.71598	2.22679	2.4192	1.76114	At5g35370	G-type lectin S-receptor-like serine/threonine-protein kinase At5g35370			GO:0005886,GO:0005524,GO:0005516,GO:0030246,GO:0106310,GO:0004674,GO:0031625,GO:0006468	plasma membrane|ATP binding|calmodulin binding|carbohydrate binding|protein serine kinase activity|protein serine/threonine kinase activity|ubiquitin protein ligase binding|protein phosphorylation
J2O13_02G004117	4.10808	7.88447	0.331684	0.044438	-4.49206	0.00771503	0.0215532	Down	0.0401636	0	0	0.206183	0.16484	0.437072	ERF012	Ethylene-responsive transcription factor ERF012			GO:0005634,GO:0003700,GO:0000976,GO:0071497,GO:0034605,GO:0009873,GO:0045893,GO:0009753,GO:0009751	nucleus|DNA-binding transcription factor activity|transcription cis-regulatory region binding|cellular response to freezing|cellular response to heat|ethylene-activated signaling pathway|positive regulation of DNA-templated transcription|response to jasmonic acid|response to salicylic acid
J2O13_02G004121	299.299	476.298	122.299	0.256686	-1.96192	0.00606735	0.017528	Down	1.04959	2.24857	0.241059	4.63839	3.90461	2.74061	At1g21890	WAT1-related protein At1g21890			GO:0005886,GO:0022857	plasma membrane|transmembrane transporter activity
J2O13_02G004130	152.1	74.0838	230.115	3.10009	1.63231	0.00789684	0.0219998	Up	2.02151	2.9175	2.51283	0.347749	0.289726	1.4236
J2O13_02G004137	836.717	530.637	1142.8	2.15389	1.10694	8.69E-07	6.33E-06	Up	11.4757	15.1064	11.3452	4.4024	5.64645	4.40826
J2O13_02G004144	483.355	644.77	321.94	0.499656	-1.00099	1.08E-09	1.30E-08	Down	3.7899	3.56194	4.31676	6.86371	5.72132	6.61526	HCS1	Biotin--protein ligase 1, chloroplastic	ko00780	Biotin metabolism	GO:0009507,GO:0005737,GO:0005829,GO:0009536,GO:0005524,GO:0004077,GO:0004078,GO:0042966,GO:0036211	chloroplast|cytoplasm|cytosol|plastid|ATP binding|biotin-[acetyl-CoA-carboxylase] ligase activity|biotin-[methylcrotonoyl-CoA-carboxylase] ligase activity|biotin carboxyl carrier protein biosynthetic process|protein modification process
J2O13_02G004152	715.213	427.022	1003.4	2.35094	1.23323	0.000609579	0.00236567	Up	12.1038	10.7671	11.6105	4.70726	4.87921	2.26952	OsI_011697	Probable 6-phosphogluconolactonase 1	ko00030	Pentose phosphate pathway	GO:0017057,GO:0005975,GO:0006098	6-phosphogluconolactonase activity|carbohydrate metabolic process|pentose-phosphate shunt
J2O13_02G004153	1015.07	1802.77	227.367	0.12611	-2.98725	9.75E-16	2.64E-14	Down	11.6427	15.4599	10.4733	93.5813	99.5613	48.3187	CML29	Probable calcium-binding protein CML29			GO:0005509	calcium ion binding
J2O13_02G004167	977.39	1360.87	593.91	0.436509	-1.19592	5.23E-08	4.78E-07	Down	4.96625	5.48356	5.30462	10.4466	11.0504	7.95522	ARF17	Auxin response factor 17			GO:0005634,GO:0000987,GO:0003700,GO:0003690,GO:0048830,GO:0009653,GO:0009734,GO:0052543,GO:0009555,GO:0010208,GO:0120195,GO:0006355	nucleus|cis-regulatory region sequence-specific DNA binding|DNA-binding transcription factor activity|double-stranded DNA binding|adventitious root development|anatomical structure morphogenesis|auxin-activated signaling pathway|callose deposition in cell wall|pollen development|pollen wall assembly|positive regulation of anther dehiscence|regulation of DNA-templated transcription
J2O13_02G004175	1601.9	2590.84	612.962	0.236595	-2.07951	7.06E-06	4.30E-05	Down	6.82551	10.2584	7.49074	34.3135	37.0211	12.2815	PPCS2	Phosphopantothenate--cysteine ligase 2			GO:0005737,GO:0005634,GO:0004632,GO:0015937	cytoplasm|nucleus|phosphopantothenate--cysteine ligase activity|coenzyme A biosynthetic process
J2O13_02G004182	106.789	11.7209	201.857	17.2204	4.10604	8.83E-08	7.76E-07	Up	5.31043	0.642581	2.93377	0.14897	0.107189	0.170041	ALD1	Aminotransferase ALD1, chloroplastic	ko00300	Lysine biosynthesis	GO:0009507,GO:0009536,GO:0062045,GO:0030170,GO:0008483,GO:0042742,GO:0062034,GO:0010150,GO:0009627,GO:0009862	chloroplast|plastid|L-lysine alpha-aminotransferase|pyridoxal phosphate binding|transaminase activity|defense response to bacterium|L-pipecolic acid biosynthetic process|leaf senescence|systemic acquired resistance|systemic acquired resistance, salicylic acid mediated signaling pathway
J2O13_02G004184	258.428	118.522	398.333	3.36408	1.75021	0.00130978	0.00463747	Up	29.466	19.2067	32.851	7.26907	9.68585	2.48353
J2O13_02G004200	923.991	488.966	1359.02	2.78011	1.47514	0.00162352	0.00559808	Up	12.4942	8.72663	18.9819	3.97959	5.63905	2.02009	SULTR12	Sulfate transporter 1.2			GO:0005886,GO:0008271,GO:0015293,GO:0009970	plasma membrane|secondary active sulfate transmembrane transporter activity|symporter activity|cellular response to sulfate starvation
J2O13_02G004201	81.8686	121.399	42.3385	0.349484	-1.5167	3.05E-06	2.00E-05	Down	1.01748	1.10497	1.31483	3.0011	2.81327	2.21898	SULTR13	Sulfate transporter 1.3			GO:0005886,GO:0008271,GO:0015293	plasma membrane|secondary active sulfate transmembrane transporter activity|symporter activity
J2O13_02G004204	4.94785	9.27032	0.625383	0.0692386	-3.85228	0.0123725	0.0323628	Down	0	0	0.0544003	0.145021	0.231885	0.283773	LTPG4	Non-specific lipid transfer protein GPI-anchored 4			GO:0005886,GO:0008289,GO:0006869	plasma membrane|lipid binding|lipid transport
J2O13_02G004205	4.3948	8.78959	0	0.020526	-5.60641	0.00277349	0.00888563	Down	0	0	0	0.272802	0.0872403	0.22242	LTPG4	Non-specific lipid transfer protein GPI-anchored 4			GO:0005886,GO:0008289,GO:0006869	plasma membrane|lipid binding|lipid transport
J2O13_02G004206	2086.15	3071.22	1101.08	0.358558	-1.47972	1.35E-07	1.15E-06	Down	17.6714	25.5547	29.9977	59.24	62.6647	44.4148	FLZ6	FCS-Like Zinc finger 6			GO:0005737,GO:0005829,GO:0005783,GO:0005634,GO:0019900,GO:0046872,GO:0042594,GO:0090351	cytoplasm|cytosol|endoplasmic reticulum|nucleus|kinase binding|metal ion binding|response to starvation|seedling development
J2O13_02G004216	2966.24	1966.84	3965.64	2.016	1.01149	3.62E-09	4.01E-08	Up	24.0319	32.8575	27.4341	10.1215	10.8867	13.6486	PRP19B	Pre-mRNA-processing factor 19 homolog 2			GO:0080008,GO:0005737,GO:0005783,GO:0005634,GO:0009505,GO:0000974,GO:0071006,GO:0061630,GO:0004842,GO:0042742,GO:0006281,GO:0045087,GO:0000398,GO:0070534	Cul4-RING E3 ubiquitin ligase complex|cytoplasm|endoplasmic reticulum|nucleus|plant-type cell wall|Prp19 complex|U2-type catalytic step 1 spliceosome|ubiquitin protein ligase activity|ubiquitin-protein transferase activity|defense response to bacterium|DNA repair|innate immune response|mRNA splicing, via spliceosome|protein K63-linked ubiquitination
J2O13_02G004218	5082.75	2292.91	7872.59	3.43363	1.77974	5.10E-42	1.32E-39	Up	165.339	207.848	200.473	44.808	44.3703	48.4308	RAP2-4	Ethylene-responsive transcription factor RAP2-4			GO:0005634,GO:0003677,GO:0003700,GO:0043565,GO:0000976,GO:0071472,GO:0009736,GO:0009873,GO:0045595,GO:0009409,GO:0009408,GO:0009416,GO:0006970,GO:0009651,GO:0009414,GO:0009611	nucleus|DNA binding|DNA-binding transcription factor activity|sequence-specific DNA binding|transcription cis-regulatory region binding|cellular response to salt stress|cytokinin-activated signaling pathway|ethylene-activated signaling pathway|regulation of cell differentiation|response to cold|response to heat|response to light stimulus|response to osmotic stress|response to salt stress|response…
J2O13_02G004220	175.793	280.161	71.4254	0.254539	-1.97404	5.84E-21	2.85E-19	Down	1.07344	1.23263	0.960775	3.14336	3.45004	4.01195	TPPD	Probable trehalose-phosphate phosphatase D	ko00500	Starch and sucrose metabolism	GO:0009507,GO:0015927,GO:0004805,GO:0006970,GO:0006979,GO:0009651,GO:0005992	chloroplast|trehalase activity|trehalose-phosphatase activity|response to osmotic stress|response to oxidative stress|response to salt stress|trehalose biosynthetic process
J2O13_02G004231	405.157	59.5135	750.8	12.585	3.65363	2.34E-18	8.77E-17	Up	10.0774	4.43529	6.95929	0.298709	0.418245	0.710882	VQ22	VQ motif-containing protein 22			GO:0005634	nucleus
J2O13_02G004235	136.259	218.233	54.2856	0.248808	-2.00689	0.000175014	0.000781724	Down	0.721093	0.247432	0.378711	1.51436	1.95731	0.919158	APUM7	Putative pumilio homolog 7, chloroplastic			GO:0009507,GO:0005737,GO:0003729,GO:0010608,GO:0006417	chloroplast|cytoplasm|mRNA binding|post-transcriptional regulation of gene expression|regulation of translation
J2O13_02G004262	14.3841	25.5273	3.24087	0.127439	-2.97212	0.00264013	0.00851518	Down	0.0952333	0	0.0611302	0.380245	0.377829	0.239159	UGT85A24	7-deoxyloganetin glucosyltransferase			GO:0035251	UDP-glucosyltransferase activity
J2O13_02G004264	18.3412	34.6975	1.98488	0.0569675	-4.13372	0.000216998	0.000943005	Down	0.0329327	0.0497217	0.0158546	0.619896	0.662298	0.0964879	UGT85A24	7-deoxyloganetin glucosyltransferase			GO:0035251	UDP-glucosyltransferase activity
J2O13_02G004265	116.876	26.4574	207.296	7.79962	2.9634	3.96E-06	2.54E-05	Up	6.23054	2.43881	4.93673	0.222117	0.284127	0.977921	PHI-1	Protein PHOSPHATE-INDUCED 1			GO:0048046,GO:0005615	apoplast|extracellular space
J2O13_02G004268	693.446	300.813	1086.08	3.60851	1.8514	1.30E-07	1.10E-06	Up	38.6247	21.4846	38.4275	5.80626	5.69311	11.3365	EXL2	Protein EXORDIUM-like 2			GO:0048046,GO:0005615,GO:0005794,GO:0009505,GO:0009506,GO:0009536,GO:0071456	apoplast|extracellular space|Golgi apparatus|plant-type cell wall|plasmodesma|plastid|cellular response to hypoxia
J2O13_02G004294	61.3222	32.7979	89.8465	2.73324	1.45061	0.00229457	0.00755371	Up	12.7456	10.4749	8.55669	3.20149	1.63171	4.89419
J2O13_02G004300	82.8207	136.095	29.546	0.21712	-2.20344	0.0147942	0.0376631	Down	0.461213	0.827531	0.502002	2.48777	3.83521	0.251792	ATL11	RING-H2 finger protein ATL11			GO:0016020,GO:0046872,GO:0016740,GO:0016567	membrane|metal ion binding|transferase activity|protein ubiquitination
J2O13_02G004301	21865.8	33683.4	10048.3	0.298318	-1.74508	5.39E-09	5.86E-08	Down	127.852	187.358	169.189	484.707	527.317	307.056	2ODD19	2-oxoglutarate-dependent dioxygenase 19			GO:0005737,GO:0051213,GO:0031418,GO:0046872	cytoplasm|dioxygenase activity|L-ascorbic acid binding|metal ion binding
J2O13_02G004306	72.5675	121.003	24.1316	0.199577	-2.32498	2.90E-10	3.80E-09	Down	0.233274	0.469594	0.434241	1.62331	1.40419	1.66633	DTX27	Protein DETOXIFICATION 27			GO:0016020,GO:0015297,GO:0022857,GO:0042910,GO:1990961	membrane|antiporter activity|transmembrane transporter activity|xenobiotic transmembrane transporter activity|xenobiotic detoxification by transmembrane export across the plasma membrane
J2O13_02G004322	1893.08	2609.98	1176.17	0.450609	-1.15005	7.72E-13	1.45E-11	Down	31.5784	41.2422	33.0106	65.0781	59.0664	69.5705	ZHD1	Zinc-finger homeodomain protein 2			GO:0005634,GO:0003677,GO:0003700,GO:0046872,GO:0042803,GO:0000976,GO:0009793,GO:0006355	nucleus|DNA binding|DNA-binding transcription factor activity|metal ion binding|protein homodimerization activity|transcription cis-regulatory region binding|embryo development ending in seed dormancy|regulation of DNA-templated transcription
J2O13_02G004323	426.998	264.954	589.041	2.22505	1.15384	0.000264421	0.00112575	Up	10.552	11.4035	11.069	4.59332	4.81702	2.63443	At1g28390	Serine/threonine-protein kinase-like protein At1g28390			GO:0005886,GO:0005524,GO:0106310,GO:0004674,GO:0006468	plasma membrane|ATP binding|protein serine kinase activity|protein serine/threonine kinase activity|protein phosphorylation
J2O13_02G004335	1497.73	847.178	2148.28	2.53635	1.34275	8.14E-12	1.32E-10	Up	50.0589	33.728	43.2759	13.8426	13.9531	13.3146	PUMP5	Mitochondrial uncoupling protein 5			GO:0005743,GO:0015297,GO:0005310,GO:0015140,GO:0015131,GO:0017077,GO:0015141,GO:0015116,GO:0015117,GO:0022857,GO:0071456,GO:0071423,GO:0006839,GO:0015729,GO:0035435,GO:1902600,GO:0071422,GO:0008272,GO:0015709	mitochondrial inner membrane|antiporter activity|dicarboxylic acid transmembrane transporter activity|malate transmembrane transporter activity|oxaloacetate transmembrane transporter activity|oxidative phosphorylation uncoupler activity|succinate transmembrane transporter activity|sulfate transmembrane transporter activity|thiosulfate transmembrane transporter activity|transmembrane transporter a…
J2O13_02G004337	10722.5	6615.45	14829.6	2.2416	1.16453	0.0189564	0.0464855	Up	391.552	205.561	260.765	64.1717	55.4509	206.66	AED3	Aspartyl protease AED3			GO:0048046,GO:0099503,GO:0004190,GO:0000166,GO:0006508,GO:0043067,GO:0009627	apoplast|secretory vesicle|aspartic-type endopeptidase activity|nucleotide binding|proteolysis|regulation of programmed cell death|systemic acquired resistance
J2O13_02G004340	520.412	50.4396	990.385	19.7096	4.30082	1.25E-72	2.47E-69	Up	13.8445	11.3018	10.6618	0.582555	0.451036	0.459969	AHL17	AT-hook motif nuclear-localized protein 17			GO:0005634,GO:0003700,GO:0003680	nucleus|DNA-binding transcription factor activity|minor groove of adenine-thymine-rich DNA binding
J2O13_02G004343	52.5175	21.8377	83.1973	3.79932	1.92574	0.000143375	0.000653016	Up	3.88953	2.37154	3.16887	0.671972	0.337688	1.06444	BHLH30	Transcription factor bHLH30			GO:0005634,GO:0003677,GO:0003700,GO:0046983,GO:0006355	nucleus|DNA binding|DNA-binding transcription factor activity|protein dimerization activity|regulation of DNA-templated transcription
J2O13_02G004349	4858.86	2292.35	7425.36	3.2396	1.69582	1.16E-23	7.01E-22	Up	53.786	62.2179	50.7091	14.7027	14.5319	12.9688	MSL2	Mechanosensitive ion channel protein 2, chloroplastic			GO:0009507,GO:0031969,GO:0009526,GO:0010020,GO:0006811,GO:0055085	chloroplast|chloroplast membrane|plastid envelope|chloroplast fission|ion transport|transmembrane transport
J2O13_02G004350	201.432	79.2502	323.613	4.07771	2.02776	0.0140076	0.0359955	Up	2.52935	1.20529	2.26479	0.130682	0.110329	1.0382	KIN4C	Kinesin-like protein KIN-4C			GO:0005874,GO:0005875,GO:0009506,GO:0005524,GO:0008017,GO:0003777,GO:0071555,GO:0007018,GO:0007052,GO:0051231	microtubule|microtubule associated complex|plasmodesma|ATP binding|microtubule binding|microtubule motor activity|cell wall organization|microtubule-based movement|mitotic spindle organization|spindle elongation
J2O13_02G004365	564.911	801.222	328.599	0.410183	-1.28566	0.015067	0.0382266	Down	5.49159	7.81739	6.19401	17.2001	16.3244	4.597	UGT91C1	UDP-glycosyltransferase 91C1			GO:0008194	UDP-glycosyltransferase activity
J2O13_02G004373	422.872	689.302	156.441	0.227014	-2.13915	2.13E-15	5.58E-14	Down	0.541849	0.736898	0.681023	2.38172	2.77728	1.88704	GWD2	Alpha-glucan water dikinase 2			GO:0009941,GO:0005524,GO:0102216,GO:0046872,GO:0102218,GO:0005975,GO:0016310	chloroplast envelope|ATP binding|maltodextrin water dikinase|metal ion binding|starch, H2O dikinase activity|carbohydrate metabolic process|phosphorylation
J2O13_02G004381	2768.78	3841.11	1696.44	0.441663	-1.17898	5.13E-14	1.13E-12	Down	15.6882	15.623	13.6877	28.7727	28.9061	25.8837	At1g09900	Pentatricopeptide repeat-containing protein At1g09900
J2O13_02G004389	3423.66	5382.17	1465.14	0.272204	-1.87724	4.68E-23	2.70E-21	Down	21.4186	23.2449	22.3088	62.674	52.7563	89.218	At5g64460	Phosphoglycerate mutase-like protein 1			GO:0005737,GO:0005829,GO:0009536,GO:0016791	cytoplasm|cytosol|plastid|phosphatase activity
J2O13_02G004404	118.143	197.244	39.0416	0.197888	-2.33724	0.00833552	0.0230631	Down	0.26074	0.924797	0.274963	2.79391	2.76195	0.342988	DTX48	Protein DETOXIFICATION 48			GO:0005794,GO:0000139,GO:0017119,GO:0043229,GO:0005770,GO:0031902,GO:0016020,GO:0015297,GO:0005381,GO:0022857,GO:0042910,GO:0055072,GO:0006826,GO:1905428,GO:0009737,GO:0009646,GO:0009408,GO:0009624,GO:0006970,GO:0010015,GO:1990961	Golgi apparatus|Golgi membrane|Golgi transport complex|intracellular organelle|late endosome|late endosome membrane|membrane|antiporter activity|iron ion transmembrane transporter activity|transmembrane transporter activity|xenobiotic transmembrane transporter activity|iron ion homeostasis|iron ion transport|regulation of plant organ formation|response to abscisic acid|response to absence of ligh…
J2O13_02G004416	937.753	1318.6	556.912	0.422385	-1.24337	1.11E-05	6.49E-05	Down	2.09	3.13726	2.39566	5.27944	5.64427	3.79446	SRO3	Probable inactive poly [ADP-ribose] polymerase SRO3			GO:0005634,GO:0003950	nucleus|NAD+ ADP-ribosyltransferase activity
J2O13_02G004417	2566.31	3696.38	1436.23	0.388567	-1.36376	1.17E-05	6.78E-05	Down	13.3494	18.0768	14.001	37.6371	35.9281	21.352	ITPK3	Inositol-tetrakisphosphate 1-kinase 3	ko00562,ko04070	Inositol phosphate metabolism|Phosphatidylinositol signaling system	GO:0005737,GO:0005634,GO:0005524,GO:0047325,GO:0052726,GO:0052725,GO:0000287,GO:0052746,GO:0032957,GO:0009611	cytoplasm|nucleus|ATP binding|inositol tetrakisphosphate 1-kinase activity|inositol-1,3,4-trisphosphate 5-kinase activity|inositol-1,3,4-trisphosphate 6-kinase activity|magnesium ion binding|inositol phosphorylation|inositol trisphosphate metabolic process|response to wounding
J2O13_02G004427	57.9928	5.08094	110.905	21.3947	4.41918	1.05E-08	1.08E-07	Up	2.68265	2.39493	2.76267	0.0399175	0.0191481	0.253855	HAT22	Homeobox-leucine zipper protein HAT22			GO:0005634,GO:0003700,GO:0000981,GO:0000976,GO:0009738,GO:0009737,GO:0009735,GO:0009414	nucleus|DNA-binding transcription factor activity|DNA-binding transcription factor activity, RNA polymerase II-specific|transcription cis-regulatory region binding|abscisic acid-activated signaling pathway|response to abscisic acid|response to cytokinin|response to water deprivation
J2O13_02G004432	3.75018	0	7.50037	40.4599	5.33842	0.0189908	0.0465442	Up	0.274385	0.0184118	0.123289	0	0	0	RAX3	Transcription factor RAX3			GO:0005634,GO:0003677,GO:0003700	nucleus|DNA binding|DNA-binding transcription factor activity
J2O13_02G004443	228.216	29.2792	427.154	14.5328	3.86124	7.70E-07	5.67E-06	Up	4.3693	2.21939	3.95628	0.0835385	0.0467514	0.497207	CRL5	AP2-like ethylene-responsive transcription factor CRL5			GO:0005634,GO:0003677,GO:0003700,GO:0048830,GO:0080037	nucleus|DNA binding|DNA-binding transcription factor activity|adventitious root development|negative regulation of cytokinin-activated signaling pathway
J2O13_02G004446	248.297	97.7862	398.808	4.07336	2.02622	0.0100737	0.0271842	Up	3.91095	1.94249	2.98437	0.200146	0.180015	1.50536	GRF6	Growth-regulating factor 6			GO:0005634,GO:0005524,GO:0032502,GO:0006351,GO:0006355	nucleus|ATP binding|developmental process|DNA-templated transcription|regulation of DNA-templated transcription
J2O13_02G004453	9.54147	0.309089	18.7739	51.9511	5.69908	9.15E-05	0.000435951	Up	1.10387	1.46194	0.727219	0	0	0.0486341	BZIP4	Basic leucine zipper 4			GO:0005634,GO:0003700,GO:0000976,GO:0045893	nucleus|DNA-binding transcription factor activity|transcription cis-regulatory region binding|positive regulation of DNA-templated transcription
J2O13_02G004459	1520.82	815.205	2226.44	2.73056	1.44919	7.63E-06	4.62E-05	Up	34.2919	56.1733	61.6537	12.1447	11.8178	22.6138	PP2A10	Protein PHLOEM PROTEIN 2-LIKE A10			GO:0016020,GO:0030246	membrane|carbohydrate binding
J2O13_02G004463	30.235	17.99	42.48	2.37069	1.24531	0.00604343	0.0174646	Up	0.743708	0.925856	0.847988	0.301411	0.353428	0.21298	GAI1	DELLA protein GAI1	ko04075	Plant hormone signal transduction	GO:0005634,GO:0009740	nucleus|gibberellic acid mediated signaling pathway
J2O13_02G004467	2234.78	3295.48	1174.09	0.356262	-1.48899	1.03E-18	3.99E-17	Down	16.5486	15.6678	13.1083	36.6691	34.5408	33.2383	LCAT1	Lecithin-cholesterol acyltransferase-like 1			GO:0016020,GO:0000325,GO:0008374,GO:0006629	membrane|plant-type vacuole|O-acyltransferase activity|lipid metabolic process
J2O13_02G004472	34.4101	51.5572	17.263	0.334328	-1.58067	0.00278593	0.00892231	Down	0.283819	0.367293	0.409912	0.641776	0.599067	1.42551
J2O13_02G004478	8380.92	11527.6	5234.27	0.454067	-1.13902	9.58E-05	0.000454781	Down	69.0727	119.068	77.1767	174.282	173.919	129.241	WLIM1	LIM domain-containing protein WLIM1			GO:0005737,GO:0005856,GO:0005886,GO:0051015,GO:0046872,GO:0003729,GO:0051017	cytoplasm|cytoskeleton|plasma membrane|actin filament binding|metal ion binding|mRNA binding|actin filament bundle assembly
J2O13_02G004481	79.9474	37.2141	122.681	3.30527	1.72477	0.00373958	0.0115288	Up	4.82451	4.74309	4.32119	1.34394	1.65774	0.375683
J2O13_02G004504	2064.65	897.637	3231.66	3.59889	1.84755	9.23E-18	3.24E-16	Up	69.9206	86.9825	88.2214	15.0577	16.1516	25.5455
J2O13_02G004508	3.64401	0.361896	6.92612	19.1592	4.25997	0.013176	0.0341387	Up	1.22263	1.09388	0.523203	0.11623	0	0
J2O13_02G004528	21.3246	8.98531	33.664	3.70814	1.8907	0.0143252	0.0366738	Up	1.13694	1.28741	1.19733	0.121595	0.116656	0.594832	CYP81C13	Cytochrome P450 81C13			GO:0020037,GO:0005506,GO:0004497,GO:0016705	heme binding|iron ion binding|monooxygenase activity|oxidoreductase activity, acting on paired donors, with incorporation or reduction of molecular oxygen
J2O13_02G004546	507.999	303.184	712.814	2.35017	1.23276	0.0198452	0.0482532	Up	5.17492	8.17426	13.9418	2.03607	1.88102	5.90238	At3g16150	Probable isoaspartyl peptidase/L-asparaginase 2	ko00250,ko00460	Alanine, aspartate and glutamate metabolism|Cyanoamino acid metabolism	GO:0005737,GO:0004067,GO:0008798,GO:0016540	cytoplasm|asparaginase activity|beta-aspartyl-peptidase activity|protein autoprocessing
J2O13_02G004547	1224.65	579.719	1869.59	3.22403	1.68886	0.0017214	0.00588886	Up	21.7572	14.613	20.4662	2.7537	2.1892	10.1388	CYCD3-3	Cyclin-D3-3	ko04075	Plant hormone signal transduction	GO:0000307,GO:0005737,GO:0005634,GO:0016538,GO:0051301,GO:0010444,GO:0044772,GO:0000079,GO:0048316	cyclin-dependent protein kinase holoenzyme complex|cytoplasm|nucleus|cyclin-dependent protein serine/threonine kinase regulator activity|cell division|guard mother cell differentiation|mitotic cell cycle phase transition|regulation of cyclin-dependent protein serine/threonine kinase activity|seed development
J2O13_02G004558	653.79	376.689	930.892	2.47004	1.30453	0.000798198	0.00300344	Up	12.22	7.32969	12.4421	2.46122	2.52858	5.90627	At5g67200	Probable inactive receptor kinase At5g67200			GO:0005886,GO:0005524,GO:0004672,GO:0006468	plasma membrane|ATP binding|protein kinase activity|protein phosphorylation
J2O13_02G004563	6109.38	8453.06	3765.7	0.445488	-1.16654	4.71E-21	2.31E-19	Down	42.5673	46.7592	41.4277	82.9297	78.516	79.7831
J2O13_02G004573	1439.23	2128.26	750.198	0.35241	-1.50467	4.12E-13	8.09E-12	Down	8.52885	10.3582	7.77086	19.3286	16.9524	26.6109	At1g01540	Probable serine/threonine-protein kinase At1g01540			GO:0005886,GO:0005524,GO:0106310,GO:0004674,GO:0046777	plasma membrane|ATP binding|protein serine kinase activity|protein serine/threonine kinase activity|protein autophosphorylation
J2O13_02G004574	380.751	623.547	137.955	0.221263	-2.17616	0.0112848	0.029971	Down	0.84307	2.40025	1.78585	8.23342	9.18418	0.63516	sbt3	Subtilisin-like protease SBT3			GO:0005615,GO:0042802,GO:0042803,GO:0004252,GO:0008236,GO:0006952,GO:0043171,GO:0009827,GO:1900367,GO:0010628,GO:0006508,GO:1902066,GO:0009611,GO:0097264	extracellular space|identical protein binding|protein homodimerization activity|serine-type endopeptidase activity|serine-type peptidase activity|defense response|peptide catabolic process|plant-type cell wall modification|positive regulation of defense response to insect|positive regulation of gene expression|proteolysis|regulation of cell wall pectin metabolic process|response to wounding|self …
J2O13_02G004577	16.177	2.83461	29.5193	10.2105	3.35198	0.00308474	0.00973573	Up	1.86243	1.87459	2.94091	0.0637393	0	0.498892	RALFL34	Protein RALF-like 34			GO:0048046,GO:0005179,GO:0019722,GO:0007267	apoplast|hormone activity|calcium-mediated signaling|cell-cell signaling
J2O13_02G004585	4587.17	6642.3	2532.05	0.381177	-1.39147	1.24E-43	3.75E-41	Down	25.4203	29.1972	26.7549	55.9583	55.3146	64.9663
J2O13_02G004589	4518.56	6968.7	2068.42	0.296828	-1.7523	7.11E-24	4.38E-22	Down	30.9653	32.2839	30.6231	94.6132	88.4449	75.5675	DCL	Protein DCL, chloroplastic			GO:0009507,GO:0003729,GO:0009658,GO:1901259	chloroplast|mRNA binding|chloroplast organization|chloroplast rRNA processing
J2O13_02G004592	816.741	1537.06	96.4179	0.0626596	-3.99632	5.04E-44	1.57E-41	Down	1.35081	1.81761	0.972046	19.161	18.9196	16.0806	CYP707A1	Abscisic acid 8'-hydroxylase CYP707A1	ko00906	Carotenoid biosynthesis	GO:0016020,GO:0010295,GO:0020037,GO:0005506,GO:0004497,GO:0016491,GO:0046345,GO:0009856,GO:0009737,GO:0009733,GO:0009414,GO:0016125	membrane|(+)-abscisic acid 8'-hydroxylase activity|heme binding|iron ion binding|monooxygenase activity|oxidoreductase activity|abscisic acid catabolic process|pollination|response to abscisic acid|response to auxin|response to water deprivation|sterol metabolic process
J2O13_02G004593	2130.59	2972.76	1288.42	0.433437	-1.2061	1.37E-13	2.85E-12	Down	27.5874	27.9991	25.9986	52.0926	55.8139	46.2919	At1g07700	Thioredoxin-like 4, chloroplastic			GO:0009507,GO:0009570	chloroplast|chloroplast stroma
J2O13_02G004595	4324.46	2520.78	6128.15	2.43091	1.2815	0.000178663	0.00079603	Up	59.2071	26.916	43.7297	11.5715	12.094	20.9342	AMY1.1	Alpha-amylase	ko00500,ko04970,ko04972,ko04973	Starch and sucrose metabolism|Salivary secretion|Pancreatic secretion|Carbohydrate digestion and absorption	GO:0004556,GO:0005509,GO:0005975	alpha-amylase activity|calcium ion binding|carbohydrate metabolic process
J2O13_02G004597	3935.17	5417.39	2452.95	0.452802	-1.14305	2.06E-13	4.17E-12	Down	17.2365	17.8209	15.3794	32.7734	29.8472	28.7549	CYPRO4	Protein CYPRO4			GO:0005737,GO:0005635	cytoplasm|nuclear envelope
J2O13_02G004603	331.709	463.842	199.576	0.430232	-1.21681	7.34E-05	0.000357812	Down	14.5903	23.0276	14.4639	39.74	26.929	32.8103		Polcalcin Cup a 4 OS=Hesperocyparis arizonica OX=49011 PE=1 SV=1			GO:0005509,GO:0042803	calcium ion binding|protein homodimerization activity
J2O13_02G004609	1449.38	2058.11	840.65	0.408473	-1.29169	0.00706603	0.0199916	Down	28.1589	31.7734	21.0093	67.5355	69.8125	22.1052
J2O13_02G004621	1487.12	2445.16	529.071	0.216364	-2.20847	2.61E-08	2.54E-07	Down	5.96604	6.85536	3.84634	24.8444	25.3335	12.2759	CXE2	Probable carboxylesterase 2			GO:0106435	carboxylesterase activity
J2O13_02G004623	80.2274	32.1801	128.275	3.99712	1.99896	0.00266332	0.00857587	Up	0.762338	0.789397	0.575596	0.183006	0.207086	0.0367282	PLP2	Patatin-like protein 2			GO:0005737,GO:0016020,GO:0005777,GO:0047372,GO:0042802,GO:0016298,GO:0004620,GO:0071456,GO:0051607,GO:0016042,GO:0006629,GO:0031408,GO:0009626,GO:0046686	cytoplasm|membrane|peroxisome|acylglycerol lipase activity|identical protein binding|lipase activity|phospholipase activity|cellular response to hypoxia|defense response to virus|lipid catabolic process|lipid metabolic process|oxylipin biosynthetic process|plant-type hypersensitive response|response to cadmium ion
J2O13_02G004627	82.1568	49.4669	114.847	2.31866	1.21329	1.14E-05	6.65E-05	Up	1.669	1.35395	1.30718	0.479549	0.46007	0.604724
J2O13_02G004631	2546.5	3589.76	1503.25	0.418735	-1.25589	1.78E-13	3.63E-12	Down	16.8141	12.3196	14.175	25.5418	25.8002	34.3439
J2O13_02G004633	148.09	86.1001	210.081	2.43892	1.28624	9.84E-09	1.02E-07	Up	5.75994	6.15306	5.36283	1.99916	1.58343	2.27436
J2O13_02G004636	120.932	24.574	217.291	8.88606	3.15154	1.20E-13	2.52E-12	Up	8.63924	8.92152	7.02193	1.15195	0.429785	0.688753	MYB77	Transcription factor MYB77			GO:0005634,GO:0003700,GO:0000981,GO:0000978,GO:0000976,GO:0048527,GO:0010929,GO:0006355	nucleus|DNA-binding transcription factor activity|DNA-binding transcription factor activity, RNA polymerase II-specific|RNA polymerase II cis-regulatory region sequence-specific DNA binding|transcription cis-regulatory region binding|lateral root development|positive regulation of auxin mediated signaling pathway|regulation of DNA-templated transcription
J2O13_02G004642	2976.23	1898.75	4053.7	2.13524	1.0944	1.22E-07	1.04E-06	Up	35.3021	37.0311	32.6478	13.9821	15.1559	11.0298	At4g33300	Probable disease resistance protein At4g33300			GO:0048046,GO:0043531,GO:0005524,GO:0042742,GO:0050832	apoplast|ADP binding|ATP binding|defense response to bacterium|defense response to fungus
J2O13_02G004649	333.989	134.265	533.713	3.97158	1.98971	0.00970016	0.0262837	Up	7.5799	3.92956	7.95758	0.524171	0.374695	3.34854	AATL1	Lysine histidine transporter-like 8			GO:0016020,GO:0005886,GO:0015171,GO:0003333	membrane|plasma membrane|amino acid transmembrane transporter activity|amino acid transmembrane transport
J2O13_02G004650	26.4918	7.65926	45.3243	5.86316	2.55168	0.00622625	0.0179041	Up	1.30532	0.934849	1.20849	0.0859095	0.020605	0.399249	DOF3.4	Dof zinc finger protein DOF3.4			GO:0005634,GO:0003677,GO:0003700,GO:0000976,GO:0008270,GO:0042545,GO:0045787,GO:0045893,GO:0009733,GO:0009751	nucleus|DNA binding|DNA-binding transcription factor activity|transcription cis-regulatory region binding|zinc ion binding|cell wall modification|positive regulation of cell cycle|positive regulation of DNA-templated transcription|response to auxin|response to salicylic acid
J2O13_02G004666	3785.06	2111.13	5458.98	2.58602	1.37073	3.16E-11	4.75E-10	Up	107.327	97.8166	88.9445	29.3304	37.022	26.7594	CYP74A	Allene oxide synthase, chloroplastic	ko00592	alpha-Linolenic acid metabolism	GO:0009507,GO:0009978,GO:0020037,GO:0005506,GO:0004497,GO:0016705,GO:0006633,GO:0031408	chloroplast|allene oxide synthase activity|heme binding|iron ion binding|monooxygenase activity|oxidoreductase activity, acting on paired donors, with incorporation or reduction of molecular oxygen|fatty acid biosynthetic process|oxylipin biosynthetic process
J2O13_02G004669	153.106	215.955	90.2569	0.417964	-1.25855	2.09E-05	0.000114727	Down	1.49387	1.565	1.1008	3.14321	2.65267	2.34792
J2O13_02G004671	613.187	950.995	275.378	0.289618	-1.78778	1.37E-09	1.61E-08	Down	38.0029	29.5416	29.9484	104.749	103.085	65.8758
J2O13_02G004686	152.966	298.078	7.85375	0.0263435	-5.24641	1.08E-07	9.32E-07	Down	0.0167551	0.236103	0.145194	5.86324	5.4738	0.687258	At5g42610	Calcium uniporter protein 4, mitochondrial	ko04020,ko04218,ko04621,ko05010,ko05012,ko05014,ko05017,ko05020,ko05022	Calcium signaling pathway|Cellular senescence|NOD-like receptor signaling pathway|Alzheimer disease|Parkinson disease|Amyotrophic lateral sclerosis|Spinocerebellar ataxia|Prion disease|Pathways of neurodegeneration - multiple diseases	GO:0005743,GO:1990246,GO:0005262,GO:0015292,GO:0036444,GO:0051560	mitochondrial inner membrane|uniplex complex|calcium channel activity|uniporter activity|calcium import into the mitochondrion|mitochondrial calcium ion homeostasis
J2O13_02G004688	1504.1	931.142	2077.06	2.22983	1.15694	1.71E-14	3.99E-13	Up	18.6424	19.7923	21.0917	6.54683	6.36631	9.23188
J2O13_02G004691	72.9425	99.6581	46.2268	0.462815	-1.11149	0.000726703	0.00276479	Down	0.959464	1.25769	0.902336	1.56546	1.59345	2.44686	RCE2	Probable NEDD8-conjugating enzyme Ubc12-like	ko04120	Ubiquitin mediated proteolysis	GO:0005634,GO:0005524,GO:0019788,GO:0045116	nucleus|ATP binding|NEDD8 transferase activity|protein neddylation
J2O13_02G004700	68.9399	42.627	95.2529	2.24136	1.16437	0.00521255	0.0153574	Up	1.47025	1.14479	1.38892	0.534032	0.614808	0.301882	CYP734A1	Cytochrome P450 734A1			GO:0016020,GO:0020037,GO:0005506,GO:0004497,GO:0016705,GO:0008395,GO:0010268,GO:0016131,GO:0009741	membrane|heme binding|iron ion binding|monooxygenase activity|oxidoreductase activity, acting on paired donors, with incorporation or reduction of molecular oxygen|steroid hydroxylase activity|brassinosteroid homeostasis|brassinosteroid metabolic process|response to brassinosteroid
J2O13_02G004701	398.111	183.883	612.338	3.32612	1.73384	1.29E-15	3.45E-14	Up	5.98933	4.9177	5.60402	1.22591	1.08845	1.81028	GAF1	Zinc finger protein GAI-ASSOCIATED FACTOR 1			GO:0005634,GO:0003677,GO:0003700,GO:0046872,GO:0010336,GO:0009740,GO:0006355,GO:0009937	nucleus|DNA binding|DNA-binding transcription factor activity|metal ion binding|gibberellic acid homeostasis|gibberellic acid mediated signaling pathway|regulation of DNA-templated transcription|regulation of gibberellic acid mediated signaling pathway
J2O13_02G004713	39.191	16.8081	61.5739	3.63757	1.86298	0.00282146	0.00901014	Up	4.3586	3.33941	4.44723	0.333958	0.747584	1.74261	ATL24	NEP1-interacting protein-like 2			GO:0016020,GO:0046872,GO:0006952	membrane|metal ion binding|defense response
J2O13_02G004714	5241.9	7245.71	3238.09	0.446879	-1.16204	2.01E-06	1.37E-05	Down	41.0519	28.434	24.3675	54.5714	49.3579	70.3253	PGIC	Glucose-6-phosphate isomerase, cytosolic	ko00010,ko00030,ko00500,ko00520	Glycolysis / Gluconeogenesis|Pentose phosphate pathway|Starch and sucrose metabolism|Amino sugar and nucleotide sugar metabolism	GO:0005737,GO:0097367,GO:0004347,GO:0006094,GO:0006096	cytoplasm|carbohydrate derivative binding|glucose-6-phosphate isomerase activity|gluconeogenesis|glycolytic process
J2O13_02G004715	33.5554	49.7659	17.3449	0.348308	-1.52156	0.0124576	0.0325521	Down	0.307794	0.126217	0.164644	0.536448	0.25265	0.639365	LCV3	Protein LIKE COV 3			GO:0016020	membrane
J2O13_02G004725	493.626	309.86	677.392	2.18789	1.12954	1.14E-05	6.66E-05	Up	6.6236	8.01909	6.70844	3.02959	2.86379	2.06615	At1g01500	Uncharacterized protein At1g01500			GO:0016020,GO:0004617	membrane|phosphoglycerate dehydrogenase activity
J2O13_02G004726	194.851	269.026	120.676	0.448868	-1.15564	0.00113193	0.00408657	Down	2.65897	3.02241	2.69261	6.37393	5.41885	3.33874
J2O13_02G004729	2054.41	3841.64	267.167	0.0695363	-3.84609	1.98E-13	4.02E-12	Down	1.95707	4.47692	2.00528	41.6734	41.2778	14.9809
J2O13_02G004735	54.2197	107.791	0.648966	0.00604846	-7.36922	4.68E-07	3.59E-06	Down	0	0.0253581	0.0242576	3.49199	2.79179	0.231985	RL1	Protein RADIALIS-like 1			GO:0005634,GO:0003700	nucleus|DNA-binding transcription factor activity
J2O13_02G004747	405.602	545.222	265.983	0.487576	-1.0363	0.000618539	0.00239835	Down	4.20045	6.11442	3.12595	6.9873	6.75843	9.1477
J2O13_02G004749	198.54	37.0059	360.074	9.74214	3.28424	1.01E-05	5.96E-05	Up	7.45931	13.7768	4.97407	0.598972	1.38707	0.181869
J2O13_02G004752	5.24646	0.957166	9.53576	9.66723	3.2731	0.014292	0.0365992	Up	0.209417	0.526962	0.26885	0	0.0286497	0.0584344
J2O13_02G004759	13.8847	3.678	24.0915	6.54388	2.71015	0.00053357	0.00210137	Up	0.448899	0.172759	0.343235	0.033889	0.04335	0.0442086	DFR	Dihydroflavonol 4-reductase	ko00941	Flavonoid biosynthesis	GO:0045552,GO:0047890,GO:0009718	dihydrokaempferol 4-reductase activity|flavanone 4-reductase activity|anthocyanin-containing compound biosynthetic process
J2O13_02G004762	1729.86	839.896	2619.83	3.11905	1.64111	2.97E-07	2.36E-06	Up	40.6367	17.4895	30.0722	6.77322	7.4915	9.11766	MAN7	Mannan endo-1,4-beta-mannosidase 7	ko00051	Fructose and mannose metabolism	GO:0071944,GO:0005576,GO:0016985,GO:0010047,GO:1990059,GO:0071704,GO:0009828,GO:0009845	cell periphery|extracellular region|mannan endo-1,4-beta-mannosidase activity|fruit dehiscence|fruit valve development|organic substance metabolic process|plant-type cell wall loosening|seed germination
J2O13_02G004765	283.808	112.915	454.701	4.01987	2.00715	8.79E-06	5.26E-05	Up	13.8565	18.0366	15.9164	1.99077	2.02394	6.07579
J2O13_02G004767	31.8557	59.5135	4.19793	0.0707345	-3.82144	0.000995201	0.00365365	Down	0.128641	0	0.106167	0.691833	1.71967	0.246137	TCM_034091	Probable jasmonic acid carboxyl methyltransferase 2	ko00592	alpha-Linolenic acid metabolism	GO:0005737,GO:0005634,GO:0046872,GO:0030795,GO:0008757,GO:0032259,GO:0031408	cytoplasm|nucleus|metal ion binding|methyl jasmonate methylesterase activity|S-adenosylmethionine-dependent methyltransferase activity|methylation|oxylipin biosynthetic process
J2O13_02G004775	1499.96	937.164	2062.75	2.20175	1.13865	5.49E-06	3.42E-05	Up	15.973	13.5799	20.0659	6.72807	6.69553	4.9237	AP4M	AP-4 complex subunit mu	ko04142	Lysosome	GO:0030124,GO:0030131,GO:0005905,GO:0031410,GO:0005829,GO:0005802,GO:0090160,GO:0006605,GO:0016192	AP-4 adaptor complex|clathrin adaptor complex|clathrin-coated pit|cytoplasmic vesicle|cytosol|trans-Golgi network|Golgi to lysosome transport|protein targeting|vesicle-mediated transport
J2O13_02G004792	3026.62	4844.94	1208.3	0.249391	-2.00352	6.55E-27	5.50E-25	Down	5.87849	6.78716	5.50222	21.8573	19.8845	17.924	JAL3	Jacalin-related lectin 3			GO:0030246	carbohydrate binding
J2O13_02G004794	34.1163	63.9501	4.28246	0.0668489	-3.90295	1.07E-05	6.28E-05	Down	0.0475962	0.0718605	0.034371	0.92645	0.74231	0.169332	JAL3	Jacalin-related lectin 3			GO:0030246	carbohydrate binding
J2O13_02G004804	3186.86	2042.44	4331.28	2.12045	1.08437	3.78E-05	0.000196052	Up	68.9082	54.3137	86.0427	22.5125	21.5458	38.1622	WAT1	Protein WALLS ARE THIN 1			GO:0000325,GO:0009705,GO:0005886,GO:0022857,GO:0009851,GO:0010315,GO:0009734,GO:0071555,GO:0006952,GO:0009834,GO:0090355,GO:0090358,GO:0000162,GO:0009826	plant-type vacuole|plant-type vacuole membrane|plasma membrane|transmembrane transporter activity|auxin biosynthetic process|auxin export across the plasma membrane|auxin-activated signaling pathway|cell wall organization|defense response|plant-type secondary cell wall biogenesis|positive regulation of auxin metabolic process|positive regulation of tryptophan metabolic process|tryptophan biosynth…
J2O13_02G004806	33155.7	47511.5	18800	0.395695	-1.33754	0.00501951	0.0148761	Down	273.017	398.998	383.074	881.08	974.176	284.77	RD19C	Probable cysteine protease RD19C	ko04142,ko04210,ko04626	Lysosome|Apoptosis|Plant-pathogen interaction	GO:0005615,GO:0005764,GO:0000323,GO:0000325,GO:0005773,GO:0004197,GO:0051603	extracellular space|lysosome|lytic vacuole|plant-type vacuole|vacuole|cysteine-type endopeptidase activity|proteolysis involved in protein catabolic process
J2O13_02G004827	12224.2	6284.9	18163.4	2.89012	1.53113	2.77E-08	2.69E-07	Up	501.277	760.625	687.591	200.331	209.851	139.013	HTR4	Histone H3.3	ko04613,ko05202,ko05131,ko05322,ko05034	Neutrophil extracellular trap formation|Transcriptional misregulation in cancer|Shigellosis|Systemic lupus erythematosus|Alcoholism	GO:0005730,GO:0000786,GO:0005634,GO:0005886,GO:0030875,GO:0003677,GO:0046982,GO:0030527	nucleolus|nucleosome|nucleus|plasma membrane|rDNA protrusion|DNA binding|protein heterodimerization activity|structural constituent of chromatin
J2O13_02G004831	9.61588	17.6211	1.61062	0.0922333	-3.43857	0.000860447	0.0032092	Down	0	0.413242	0.592963	3.16147	3.37006	2.40577
J2O13_02G004837	4372.66	7922.77	822.554	0.103821	-3.26784	4.00E-13	7.86E-12	Down	8.7878	18.7253	12.4522	121.483	135.604	53.8877	CYP83B1	Cytochrome P450 83B1			GO:0005783,GO:0005739,GO:0005886,GO:0020037,GO:0005506,GO:0016709,GO:0048830,GO:0052544,GO:0042742,GO:0050832,GO:0009759,GO:0009684,GO:0009682,GO:0009625,GO:0010114,GO:0009641,GO:0000162	endoplasmic reticulum|mitochondrion|plasma membrane|heme binding|iron ion binding|oxidoreductase activity, acting on paired donors, with incorporation or reduction of molecular oxygen, NAD(P)H as one donor, and incorporation of one atom of oxygen|adventitious root development|defense response by callose deposition in cell wall|defense response to bacterium|defense response to fungus|indole glucos…
J2O13_02G004839	24.775	49.2374	0.312691	0.0071382	-7.13022	1.28E-05	7.38E-05	Down	0	0	0.0170283	1.08947	0.900045	0.103631	CYP83B1	Cytochrome P450 83B1			GO:0005783,GO:0005739,GO:0005886,GO:0020037,GO:0005506,GO:0016709,GO:0048830,GO:0052544,GO:0042742,GO:0050832,GO:0009759,GO:0009684,GO:0009682,GO:0009625,GO:0010114,GO:0009641,GO:0000162	endoplasmic reticulum|mitochondrion|plasma membrane|heme binding|iron ion binding|oxidoreductase activity, acting on paired donors, with incorporation or reduction of molecular oxygen, NAD(P)H as one donor, and incorporation of one atom of oxygen|adventitious root development|defense response by callose deposition in cell wall|defense response to bacterium|defense response to fungus|indole glucos…
J2O13_02G004848	235.882	76.7262	395.038	5.13513	2.3604	3.56E-12	6.12E-11	Up	2.95141	2.02286	2.59227	0.243329	0.404638	0.581945	ARF5	Auxin response factor 5	ko04075	Plant hormone signal transduction	GO:0005634,GO:0003700,GO:0042802,GO:0000976,GO:0009734,GO:0009793,GO:0009908,GO:0010305,GO:0009942,GO:0048507,GO:0006355,GO:0009733,GO:0048364,GO:0010051	nucleus|DNA-binding transcription factor activity|identical protein binding|transcription cis-regulatory region binding|auxin-activated signaling pathway|embryo development ending in seed dormancy|flower development|leaf vascular tissue pattern formation|longitudinal axis specification|meristem development|regulation of DNA-templated transcription|response to auxin|root development|xylem and phlo…
J2O13_02G004853	360.423	148.527	572.319	3.851	1.94523	1.45E-10	1.97E-09	Up	47.5825	59.4718	43.801	7.2326	14.0207	11.0886	SAUR51	Protein SMALL AUXIN UP-REGULATED RNA 51	ko04075	Plant hormone signal transduction	GO:0005886,GO:0009737,GO:0009733	plasma membrane|response to abscisic acid|response to auxin
J2O13_02G004854	7125.5	10144.8	4106.16	0.404735	-1.30495	7.30E-10	8.98E-09	Down	46.3246	39.3849	38.3483	68.3666	71.2828	116.143	APS2	ATP sulfurylase 2	ko00920,ko00230,ko00450,ko00261	Sulfur metabolism|Purine metabolism|Selenocompound metabolism|Monobactam biosynthesis	GO:0009507,GO:0009570,GO:0005634,GO:0004020,GO:0005524,GO:0004781,GO:0009970,GO:0070814,GO:0000103	chloroplast|chloroplast stroma|nucleus|adenylylsulfate kinase activity|ATP binding|sulfate adenylyltransferase (ATP) activity|cellular response to sulfate starvation|hydrogen sulfide biosynthetic process|sulfate assimilation
J2O13_02G004856	637.203	923.611	350.795	0.379934	-1.39618	8.42E-09	8.84E-08	Down	5.3013	6.32785	6.42953	13.869	14.5888	10.2978	LOG7	Cytokinin riboside 5'-monophosphate phosphoribohydrolase LOG7			GO:0005829,GO:0005634,GO:0016799,GO:0102682,GO:0009691	cytosol|nucleus|hydrolase activity, hydrolyzing N-glycosyl compounds|N6-(Delta2-isopentenyl)-adenosine 5'-monophosphate phosphoribohydrolase activity|cytokinin biosynthetic process
J2O13_02G004860	3008.82	4191.37	1826.26	0.435689	-1.19863	1.73E-07	1.43E-06	Down	66.357	49.961	53.9893	93.6848	84.6222	147.568	SPA	Protein SPA, chloroplastic			GO:0009507,GO:0009535,GO:0003756,GO:0010206	chloroplast|chloroplast thylakoid membrane|protein disulfide isomerase activity|photosystem II repair
J2O13_02G004870	10.3162	2.66802	17.9644	6.71055	2.74643	0.000444418	0.00179226	Up	1.75645	1.76792	1.78515	0.166979	0.240295	0.245054
J2O13_02G004876	40.4664	19.9684	60.9644	3.04298	1.60549	0.0122191	0.0320087	Up	1.08435	0.561307	1.22305	0.21206	0.114439	0.466822
J2O13_02G004877	181.174	260.487	101.861	0.391052	-1.35457	0.000323657	0.00135241	Down	4.02947	5.38012	3.24634	9.95581	10.2602	6.1266
J2O13_02G004885	45958	72988.6	18927.3	0.259319	-1.9472	7.64E-19	3.00E-17	Down	97.6718	128.606	100.757	377.358	363.999	289.414	PETH	Ferredoxin--NADP reductase, leaf isozyme, chloroplastic	ko00195	Photosynthesis	GO:0009570,GO:0009535,GO:0004324,GO:0015979	chloroplast stroma|chloroplast thylakoid membrane|ferredoxin-NADP+ reductase activity|photosynthesis
J2O13_02G004886	1152.08	433.317	1870.83	4.31743	2.11017	6.27E-17	1.96E-15	Up	38.839	21.653	28.7138	5.58777	5.07662	6.38913	TLP1	Thaumatin-like protein 1			GO:0006952,GO:0009617,GO:0009723	defense response|response to bacterium|response to ethylene
J2O13_02G004887	16550.1	9714.78	23385.5	2.40713	1.26731	3.74E-06	2.41E-05	Up	256.356	180.305	215.452	54.974	61.2856	110.638	HSP90	Endoplasmin homolog	ko04141,ko04151,ko04657,ko04915,ko04918,ko04626,ko05200,ko05207,ko05215,ko05132,ko05417,ko05418	Protein processing in endoplasmic reticulum|PI3K-Akt signaling pathway|IL-17 signaling pathway|Estrogen signaling pathway|Thyroid hormone synthesis|Plant-pathogen interaction|Pathways in cancer|Chemical carcinogenesis - receptor activation|Prostate cancer|Salmonella infection|Lipid and atherosclerosis|Fluid shear stress and atherosclerosis	GO:0005788,GO:0005524,GO:0016887,GO:0140662,GO:0051082	endoplasmic reticulum lumen|ATP binding|ATP hydrolysis activity|ATP-dependent protein folding chaperone|unfolded protein binding
J2O13_02G004893	1379.51	918.276	1840.74	2.0052	1.00375	9.36E-07	6.78E-06	Up	16.9896	12.7564	13.9224	6.68171	5.75449	5.38981	CLV1	Receptor protein kinase CLAVATA1			GO:0016020,GO:0000325,GO:0005886,GO:0009506,GO:0005524,GO:0043621,GO:0106310,GO:0004674,GO:0033612,GO:0030154,GO:0036289,GO:0009934	membrane|plant-type vacuole|plasma membrane|plasmodesma|ATP binding|protein self-association|protein serine kinase activity|protein serine/threonine kinase activity|receptor serine/threonine kinase binding|cell differentiation|peptidyl-serine autophosphorylation|regulation of meristem structural organization
J2O13_02G004895	1496.53	884.321	2108.75	2.38446	1.25366	2.21E-08	2.16E-07	Up	59.0307	83.3792	97.7666	25.5745	24.8747	32.8173
J2O13_02G004897	10.4617	20.6107	0.312691	0.0170134	-5.87718	0.000993437	0.00364868	Down	0	0	0.0336911	0.419134	0.0861663	1.37668	DOR	F-box protein DOR			GO:0009738,GO:0042631,GO:0009788,GO:0016567,GO:0010119,GO:0009737,GO:0009414,GO:0010118	abscisic acid-activated signaling pathway|cellular response to water deprivation|negative regulation of abscisic acid-activated signaling pathway|protein ubiquitination|regulation of stomatal movement|response to abscisic acid|response to water deprivation|stomatal movement
J2O13_02G004913	9048.22	3047.44	15049	4.93767	2.30383	1.00E-22	5.66E-21	Up	354.706	329.945	404.41	45.829	51.2563	87.179	CAD6	Probable cinnamyl alcohol dehydrogenase 6	ko00940	Phenylpropanoid biosynthesis	GO:0045551,GO:0016616,GO:0052747,GO:0008270,GO:0009809	cinnamyl-alcohol dehydrogenase activity|oxidoreductase activity, acting on the CH-OH group of donors, NAD or NADP as acceptor|sinapyl alcohol dehydrogenase activity|zinc ion binding|lignin biosynthetic process
J2O13_02G004917	2159.94	1355.87	2964.02	2.18561	1.12804	0.000243377	0.0010449	Up	28.4017	41.3324	33.2492	9.17402	10.4316	19.9791	CPK29	Calcium-dependent protein kinase 29	ko04626,ko05145	Plant-pathogen interaction|Toxoplasmosis	GO:0005737,GO:0005739,GO:0005634,GO:0005886,GO:0005524,GO:0005509,GO:0009931,GO:0005516,GO:0004683,GO:0106310,GO:0035556,GO:0018105,GO:0046777	cytoplasm|mitochondrion|nucleus|plasma membrane|ATP binding|calcium ion binding|calcium-dependent protein serine/threonine kinase activity|calmodulin binding|calmodulin-dependent protein kinase activity|protein serine kinase activity|intracellular signal transduction|peptidyl-serine phosphorylation|protein autophosphorylation
J2O13_02G004924	531.27	291.824	770.717	2.63969	1.40037	0.0159812	0.0402648	Up	11.2037	4.95197	5.78773	1.31996	1.12736	4.66174
J2O13_02G004927	2355.96	3242.37	1469.55	0.453249	-1.14162	0.000644275	0.00248678	Down	12.6338	18.3691	13.179	30.6933	31.2498	17.1742
J2O13_02G004929	242.34	66.4013	418.278	6.28716	2.65241	0.000450861	0.00181127	Up	2.50323	1.3975	2.53221	0.0693685	0.133102	0.682931	ODC	Ornithine decarboxylase			GO:0005737,GO:0004586,GO:0033387	cytoplasm|ornithine decarboxylase activity|putrescine biosynthetic process from ornithine
J2O13_02G004935	448.821	819.742	77.8992	0.0950172	-3.39567	2.44E-07	1.97E-06	Down	0.892271	1.39998	0.795952	11.8331	12.031	2.11993	HMGB9	High mobility group B protein 9			GO:0005634,GO:0003677,GO:0003700,GO:0000741,GO:0010197,GO:0006355	nucleus|DNA binding|DNA-binding transcription factor activity|karyogamy|polar nucleus fusion|regulation of DNA-templated transcription
J2O13_02G004941	943.935	1596.54	291.329	0.182471	-2.45426	3.72E-10	4.79E-09	Down	3.4608	4.9248	3.29393	20.5344	21.3874	9.88987	AMY2	Probable alpha-amylase 2	ko00500,ko04970,ko04972,ko04973	Starch and sucrose metabolism|Salivary secretion|Pancreatic secretion|Carbohydrate digestion and absorption	GO:0005829,GO:0005576,GO:0004556,GO:0005509,GO:0005987	cytosol|extracellular region|alpha-amylase activity|calcium ion binding|sucrose catabolic process
J2O13_02G004943	12058.4	21099.2	3017.52	0.143016	-2.80575	1.60E-05	9.05E-05	Down	20.1013	23.3789	20.5423	143.148	190.929	22.9755	Os10g0415800	Acylamino-acid-releasing enzyme 2	ko04614	Renin-angiotensin system	GO:0005737,GO:0004252,GO:0006508	cytoplasm|serine-type endopeptidase activity|proteolysis
J2O13_02G004965	45284.1	63388.9	27179.3	0.428772	-1.22172	0.000458847	0.00184078	Down	256.525	306.514	248.943	626.826	608.302	296.497	FTSH	ATP-dependent zinc metalloprotease FTSH, chloroplastic			GO:0031969,GO:0009534,GO:0005524,GO:0016887,GO:0004176,GO:0046872,GO:0004222,GO:0007049,GO:0051301,GO:0006508	chloroplast membrane|chloroplast thylakoid|ATP binding|ATP hydrolysis activity|ATP-dependent peptidase activity|metal ion binding|metalloendopeptidase activity|cell cycle|cell division|proteolysis
J2O13_02G004977	1791.91	2811.72	772.114	0.274609	-1.86455	1.11E-09	1.32E-08	Down	5.6516	6.25879	4.84085	17.9735	20.4107	11.197	CRP1	Pentatricopeptide repeat-containing protein At5g42310, chloroplastic			GO:0009507,GO:0042644,GO:0009570,GO:0009534,GO:0042651,GO:0003729,GO:0003727,GO:0010239,GO:0009658,GO:0006417	chloroplast|chloroplast nucleoid|chloroplast stroma|chloroplast thylakoid|thylakoid membrane|mRNA binding|single-stranded RNA binding|chloroplast mRNA processing|chloroplast organization|regulation of translation
J2O13_02G004980	27.9149	43.6032	12.2266	0.280034	-1.83633	0.0115361	0.0305565	Down	0.154272	0.26821	0.094526	0.455981	0.782822	0.258282	FMO1	Probable flavin-containing monooxygenase 1	ko00430,ko00982	Taurine and hypotaurine metabolism|Drug metabolism - cytochrome P450	GO:0050660,GO:0004499,GO:0050661,GO:0031543,GO:0062047,GO:0071456,GO:0042742,GO:0050832,GO:0062034,GO:0009626,GO:0051707,GO:0009627	flavin adenine dinucleotide binding|N,N-dimethylaniline monooxygenase activity|NADP binding|peptidyl-proline dioxygenase activity|pipecolic acid N-hydroxylase|cellular response to hypoxia|defense response to bacterium|defense response to fungus|L-pipecolic acid biosynthetic process|plant-type hypersensitive response|response to other organism|systemic acquired resistance
J2O13_02G004993	128.698	51.7618	205.634	3.98125	1.99322	8.74E-11	1.22E-09	Up	3.09475	4.17088	3.61951	0.733022	0.904175	0.600086	PIX13	Probable serine/threonine-protein kinase PIX13			GO:0005634,GO:0005886,GO:0005524,GO:0106310,GO:0004674,GO:0006952,GO:0006468	nucleus|plasma membrane|ATP binding|protein serine kinase activity|protein serine/threonine kinase activity|defense response|protein phosphorylation
J2O13_02G005009	847.247	505.426	1189.07	2.35169	1.2337	2.31E-25	1.66E-23	Up	24.2869	21.1311	23.1463	7.37712	7.5618	9.14555
J2O13_02G005010	2381.14	1518.2	3244.09	2.13749	1.09592	4.18E-23	2.43E-21	Up	34.2829	36.9033	37.138	14.2606	13.5184	13.8692	PP2C27	Probable protein phosphatase 2C 27			GO:0005737,GO:0005634,GO:0046872,GO:0017018,GO:0006470,GO:0009737,GO:0009651,GO:0009414	cytoplasm|nucleus|metal ion binding|myosin phosphatase activity|protein dephosphorylation|response to abscisic acid|response to salt stress|response to water deprivation
J2O13_02G005013	79620.4	120199	39041.4	0.324806	-1.62235	4.68E-11	6.86E-10	Down	537.123	663.139	482.991	1593.66	1515.7	1119.84	GAPB	Glyceraldehyde-3-phosphate dehydrogenase B, chloroplastic	ko00710	Carbon fixation in photosynthetic organisms	GO:0009507,GO:0047100,GO:0051287,GO:0050661,GO:0006006,GO:0019253	chloroplast|glyceraldehyde-3-phosphate dehydrogenase (NADP+) (phosphorylating) activity|NAD binding|NADP binding|glucose metabolic process|reductive pentose-phosphate cycle
J2O13_02G005015	4219.13	6332.81	2105.44	0.332489	-1.58862	8.17E-25	5.57E-23	Down	8.75719	9.01316	9.02662	23.5169	22.5754	19.8814	PAT21	Protein S-acyltransferase 21			GO:0005783,GO:0005794,GO:0005886,GO:0019706,GO:0016417,GO:1990918,GO:0018230,GO:0018345,GO:0006612	endoplasmic reticulum|Golgi apparatus|plasma membrane|protein-cysteine S-palmitoyltransferase activity|S-acyltransferase activity|double-strand break repair involved in meiotic recombination|peptidyl-L-cysteine S-palmitoylation|protein palmitoylation|protein targeting to membrane
J2O13_02G005024	6427.67	8991.05	3864.29	0.429802	-1.21825	1.76E-05	9.82E-05	Down	39.6386	45.7597	39.3677	91.7501	89.9146	54.0762	PMI1	Protein PLASTID MOVEMENT IMPAIRED 1			GO:0005829,GO:0005634,GO:0005886,GO:1902265,GO:0009738,GO:0030048,GO:0009903,GO:0009902,GO:0031022,GO:0009787,GO:0010029,GO:0009637,GO:0006970	cytosol|nucleus|plasma membrane|abscisic acid homeostasis|abscisic acid-activated signaling pathway|actin filament-based movement|chloroplast avoidance movement|chloroplast relocation|nuclear migration along microfilament|regulation of abscisic acid-activated signaling pathway|regulation of seed germination|response to blue light|response to osmotic stress
J2O13_02G005028	63.4513	8.27627	118.626	14.2461	3.83249	8.03E-14	1.73E-12	Up	2.24551	1.17143	1.50292	0.0820045	0.0674345	0.13754	PHT1-9	Probable inorganic phosphate transporter 1-9			GO:0005886,GO:0015415,GO:0015114,GO:0015293,GO:1901684,GO:0006817	plasma membrane|ATPase-coupled phosphate ion transmembrane transporter activity|phosphate ion transmembrane transporter activity|symporter activity|arsenate ion transmembrane transport|phosphate ion transport
J2O13_02G005033	4381.92	5850.84	2913.01	0.497885	-1.00612	3.28E-14	7.37E-13	Down	48.5432	52.2655	45.4144	81.8179	81.2308	78.2167	PPD3	PsbP domain-containing protein 3, chloroplastic			GO:0009507,GO:0009543,GO:0009535,GO:0019898,GO:0005739,GO:0009654,GO:0009579,GO:0031977,GO:0005509,GO:0015979	chloroplast|chloroplast thylakoid lumen|chloroplast thylakoid membrane|extrinsic component of membrane|mitochondrion|photosystem II oxygen evolving complex|thylakoid|thylakoid lumen|calcium ion binding|photosynthesis
J2O13_02G005035	8923.14	3845.57	14000.7	3.64092	1.8643	6.36E-22	3.34E-20	Up	110.813	87.8338	133.296	24.4196	26.4227	23.8459	CCR1	Cinnamoyl-CoA reductase 1			GO:0016621,GO:0016616,GO:0009809,GO:0009699	cinnamoyl-CoA reductase activity|oxidoreductase activity, acting on the CH-OH group of donors, NAD or NADP as acceptor|lignin biosynthetic process|phenylpropanoid biosynthetic process
J2O13_02G005036	4148.95	2492.28	5805.62	2.32919	1.21983	1.36E-05	7.80E-05	Up	70.7916	55.2394	73.7453	18.1571	17.8946	35.7857	HMGR1	3-hydroxy-3-methylglutaryl-coenzyme A reductase 1	ko00900,ko04152,ko04976	Terpenoid backbone biosynthesis|AMPK signaling pathway|Bile secretion	GO:0005789,GO:0031966,GO:0042170,GO:0004420,GO:0015936,GO:0008299	endoplasmic reticulum membrane|mitochondrial membrane|plastid membrane|hydroxymethylglutaryl-CoA reductase (NADPH) activity|coenzyme A metabolic process|isoprenoid biosynthetic process
J2O13_02G005047	139.138	62.5927	215.683	3.44002	1.78242	3.60E-10	4.64E-09	Up	2.2601	2.02101	2.05472	0.497956	0.350335	0.682069	BUBR1	Mitotic spindle checkpoint protein BUBR1	ko04110,ko04111,ko04113,ko04114,ko04914	Cell cycle|Cell cycle - yeast|Meiosis - yeast|Oocyte meiosis|Progesterone-mediated oocyte maturation	GO:0010369,GO:0005737,GO:0000776,GO:0005828,GO:0005634,GO:0005876,GO:0004672,GO:0051754,GO:0007094	chromocenter|cytoplasm|kinetochore|kinetochore microtubule|nucleus|spindle microtubule|protein kinase activity|meiotic sister chromatid cohesion, centromeric|mitotic spindle assembly checkpoint signaling
J2O13_02G005048	593.65	378.235	809.065	2.13807	1.09631	4.46E-06	2.82E-05	Up	58.5911	55.4626	44.0369	15.0336	23.7024	22.4414	CP12-3	Calvin cycle protein CP12-3, chloroplastic			GO:0009507,GO:0032991,GO:0005507,GO:0016151,GO:0071454,GO:0034605,GO:0080153,GO:0019253	chloroplast|protein-containing complex|copper ion binding|nickel cation binding|cellular response to anoxia|cellular response to heat|negative regulation of reductive pentose-phosphate cycle|reductive pentose-phosphate cycle
J2O13_02G005052	38.4618	59.0832	17.8404	0.300848	-1.73289	0.000489059	0.00194716	Down	0.34284	0.498447	0.183391	0.814811	0.906789	1.10013	VLG	Protein VACUOLELESS GAMETOPHYTES			GO:0009561,GO:0055046,GO:0009617,GO:0002237,GO:0002238,GO:0002240	megagametogenesis|microgametogenesis|response to bacterium|response to molecule of bacterial origin|response to molecule of fungal origin|response to molecule of oomycetes origin
J2O13_02G005055	292.297	102.936	481.658	4.67824	2.22597	2.74E-12	4.81E-11	Up	4.89715	4.06596	7.55087	0.753037	1.12072	1.02957
J2O13_02G005061	80.6974	31.2094	130.185	4.18409	2.06491	3.44E-07	2.71E-06	Up	7.54487	4.42992	7.12487	1.28279	1.50859	0.931177	CML37	Calcium-binding protein CML37	ko04626	Plant-pathogen interaction	GO:0005737,GO:0005634,GO:0005509,GO:0030234,GO:0071456,GO:0010193	cytoplasm|nucleus|calcium ion binding|enzyme regulator activity|cellular response to hypoxia|response to ozone
J2O13_03G005087	653.817	925.648	381.987	0.412774	-1.27658	3.08E-07	2.45E-06	Down	13.942	18.725	16.8006	36.6642	34.6835	26.4205
J2O13_03G005090	88.1024	154.474	21.7308	0.140287	-2.83355	2.63E-09	2.98E-08	Down	0.61209	0.488621	0.284514	2.07675	1.99239	4.22272
J2O13_03G005093	216.325	293.372	139.278	0.475035	-1.0739	5.81E-05	0.000289302	Down	1.22381	1.81891	1.78403	2.77917	3.06998	2.47016	CYP716A12	Beta-amyrin 28-monooxygenase			GO:0016020,GO:0020037,GO:0005506,GO:0004497,GO:0016491,GO:0016709,GO:0102374,GO:0102373,GO:0016135,GO:0016125	membrane|heme binding|iron ion binding|monooxygenase activity|oxidoreductase activity|oxidoreductase activity, acting on paired donors, with incorporation or reduction of molecular oxygen, NAD(P)H as one donor, and incorporation of one atom of oxygen|ursolic aldehyde 28-monooxygenase activity|uvaol dehydrogenase activity|saponin biosynthetic process|sterol metabolic process
J2O13_03G005104	2151.89	2906.75	1397.03	0.48073	-1.0567	2.69E-26	2.14E-24	Down	13.9102	12.8113	14.6349	23.3433	23.1328	24.286	FLA14	Fasciclin-like arabinogalactan protein 14			GO:0005886	plasma membrane
J2O13_03G005107	240.636	50.8458	430.427	8.44348	3.07784	2.00E-07	1.64E-06	Up	4.70636	10.9122	11.8143	0.341554	0.758838	1.65326	MYB2	Transcription factor MYB1			GO:0005634,GO:0003677,GO:0009813	nucleus|DNA binding|flavonoid biosynthetic process
J2O13_03G005108	365.015	492.327	237.703	0.482753	-1.05064	0.00233827	0.00767206	Down	3.75746	1.94909	3.54379	3.82931	4.81064	7.33204	RPA2A	Replication protein A 32 kDa subunit A	ko03030,ko03420,ko03430,ko03440,ko03460	DNA replication|Nucleotide excision repair|Mismatch repair|Homologous recombination|Fanconi anemia pathway	GO:0000781,GO:0005662,GO:0005634,GO:0035861,GO:0003697,GO:0006281,GO:0006260,GO:0000724,GO:0006289	chromosome, telomeric region|DNA replication factor A complex|nucleus|site of double-strand break|single-stranded DNA binding|DNA repair|DNA replication|double-strand break repair via homologous recombination|nucleotide-excision repair
J2O13_03G005109	5311.83	7299.84	3323.82	0.455341	-1.13498	0.000583331	0.0022767	Down	14.23	18.425	16.1679	35.1805	33.6917	17.9349	ABC1K1	Protein ACTIVITY OF BC1 COMPLEX KINASE 1, chloroplastic	ko03015,ko05134	mRNA surveillance pathway|Legionellosis	GO:0009507,GO:0005886,GO:0010287,GO:0005524,GO:0004672,GO:0106310,GO:0004674,GO:0006995,GO:0015996,GO:0009767,GO:0080177,GO:1904143,GO:1902326,GO:0006468,GO:0031540,GO:0010109,GO:1902171,GO:0009637,GO:1901562,GO:0080183,GO:0010114,GO:0009414,GO:0010027	chloroplast|plasma membrane|plastoglobule|ATP binding|protein kinase activity|protein serine kinase activity|protein serine/threonine kinase activity|cellular response to nitrogen starvation|chlorophyll catabolic process|photosynthetic electron transport chain|plastoglobule organization|positive regulation of carotenoid biosynthetic process|positive regulation of chlorophyll biosynthetic process|…
J2O13_03G005112	525.833	261.507	790.159	3.01903	1.59408	7.23E-06	4.40E-05	Up	12.5146	11.1084	10.7093	2.44355	1.95554	5.1779	At5g24080	G-type lectin S-receptor-like serine/threonine-protein kinase At5g24080			GO:0005886,GO:0005524,GO:0005516,GO:0030246,GO:0106310,GO:0004674,GO:0031625,GO:0006468,GO:0048544	plasma membrane|ATP binding|calmodulin binding|carbohydrate binding|protein serine kinase activity|protein serine/threonine kinase activity|ubiquitin protein ligase binding|protein phosphorylation|recognition of pollen
J2O13_03G005121	1807.15	2500.15	1114.14	0.445601	-1.16618	1.25E-09	1.47E-08	Down	21.8344	24.8586	17.6051	41.2983	38.8218	38.5043	PPOX2	Protoporphyrinogen oxidase 2, chloroplastic/mitochondrial			GO:0009507,GO:0009941,GO:0005739,GO:0009536,GO:0016491,GO:0004729,GO:0015995,GO:0009793,GO:0006782	chloroplast|chloroplast envelope|mitochondrion|plastid|oxidoreductase activity|oxygen-dependent protoporphyrinogen oxidase activity|chlorophyll biosynthetic process|embryo development ending in seed dormancy|protoporphyrinogen IX biosynthetic process
J2O13_03G005129	496.832	201.9	791.764	3.92546	1.97286	5.56E-11	8.07E-10	Up	13.565	21.3492	18.8467	4.25877	4.04898	2.85288	At2g24580	Probable sarcosine oxidase	ko00260,ko00310,ko04146	Glycine, serine and threonine metabolism|Lysine degradation|Peroxisome	GO:0050660,GO:0008115	flavin adenine dinucleotide binding|sarcosine oxidase activity
J2O13_03G005136	2776.36	4458.02	1094.7	0.245544	-2.02595	3.09E-27	2.69E-25	Down	10.1298	12.6343	9.58419	37.259	37.4214	33.4035	UTR7	UDP-galactose/UDP-glucose transporter 7			GO:0005794,GO:0000139,GO:0015297,GO:0005459,GO:0005460,GO:0008643,GO:0048527,GO:0080147,GO:0072334,GO:0015786	Golgi apparatus|Golgi membrane|antiporter activity|UDP-galactose transmembrane transporter activity|UDP-glucose transmembrane transporter activity|carbohydrate transport|lateral root development|root hair cell development|UDP-galactose transmembrane transport|UDP-glucose transmembrane transport
J2O13_03G005137	257.537	407.849	107.224	0.263189	-1.92583	1.84E-11	2.87E-10	Down	0.843561	0.839421	1.43985	2.78857	3.53297	3.44246	REM15.15	Putative B3 domain-containing protein REM15			GO:0005634,GO:0043565,GO:0009793,GO:0010601	nucleus|sequence-specific DNA binding|embryo development ending in seed dormancy|positive regulation of auxin biosynthetic process
J2O13_03G005147	4277.29	5859.59	2695	0.45995	-1.12045	0.000794528	0.00299216	Down	13.9803	15.3846	15.5701	31.8156	31.4495	15.7252	GLR2.7	Glutamate receptor 2.7			GO:0000325,GO:0005886,GO:0005262,GO:0008066,GO:0015276,GO:0038023,GO:0006816,GO:0019722,GO:0071230	plant-type vacuole|plasma membrane|calcium channel activity|glutamate receptor activity|ligand-gated ion channel activity|signaling receptor activity|calcium ion transport|calcium-mediated signaling|cellular response to amino acid stimulus
J2O13_03G005163	1747.83	2381.39	1114.27	0.467964	-1.09553	1.42E-05	8.12E-05	Down	14.8462	19.0214	18.3299	34.1507	33.411	23.2502
J2O13_03G005168	11.3689	3.09671	19.6412	6.38988	2.67579	0.0161227	0.0405697	Up	0.489354	0.570321	0.471174	0.0440725	0.147988	0
J2O13_03G005176	14136.3	18858.5	9414.1	0.4992	-1.00231	0.000387842	0.00158892	Down	156.249	191.448	149.034	305.08	313.947	190.143	GPX1	Phospholipid hydroperoxide glutathione peroxidase 1, chloroplastic	ko00480,ko04918,ko05014,ko05016,ko05022	Glutathione metabolism|Thyroid hormone synthesis|Amyotrophic lateral sclerosis|Huntington disease|Pathways of neurodegeneration - multiple diseases	GO:0009507,GO:0009941,GO:0009570,GO:0009535,GO:0005773,GO:0004602,GO:0004601,GO:0047066,GO:0006979	chloroplast|chloroplast envelope|chloroplast stroma|chloroplast thylakoid membrane|vacuole|glutathione peroxidase activity|peroxidase activity|phospholipid-hydroperoxide glutathione peroxidase activity|response to oxidative stress
J2O13_03G005179	737.87	1088.86	386.877	0.355361	-1.49264	2.74E-18	1.02E-16	Down	4.4918	4.71871	4.31381	10.8972	10.8147	9.4727
J2O13_03G005180	3279.35	4590.27	1968.43	0.428843	-1.22148	8.95E-06	5.35E-05	Down	11.1513	14.814	11.9062	27.1107	27.215	17.5412	PGR3	Pentatricopeptide repeat-containing protein At4g31850, chloroplastic			GO:0009507,GO:0003729,GO:0032544,GO:0043489,GO:0006412	chloroplast|mRNA binding|plastid translation|RNA stabilization|translation
J2O13_03G005186	4.73871	0.618178	8.85924	13.6085	3.76643	0.0154897	0.0391485	Up	1.04249	0.699533	0.585528	0	0	0.145445
J2O13_03G005187	514.674	310.538	718.809	2.31463	1.21078	8.31E-10	1.01E-08	Up	10.5444	7.1621	9.06406	3.00725	3.00615	3.52863			ko00564,ko00565	Glycerophospholipid metabolism|Ether lipid metabolism
J2O13_03G005190	886.679	583.381	1189.98	2.04075	1.0291	2.21E-05	0.000120609	Up	20.1453	14.5265	19.2817	7.85675	7.8077	5.89664	CM2	Chorismate mutase 2	ko00400	Phenylalanine, tyrosine and tryptophan biosynthesis	GO:0005737,GO:0005829,GO:0004106,GO:0042803,GO:0008652,GO:0009073,GO:0046417,GO:1901747	cytoplasm|cytosol|chorismate mutase activity|protein homodimerization activity|amino acid biosynthetic process|aromatic amino acid family biosynthetic process|chorismate metabolic process|prephenate(2-) biosynthetic process
J2O13_03G005193	2216.88	522.745	3911.01	7.48259	2.90354	1.23E-43	3.75E-41	Up	56.6307	42.194	58.2113	4.98464	6.74938	5.4865	WRKY40	Probable WRKY transcription factor 40			GO:0005634,GO:0003700,GO:0000976,GO:0042742,GO:0050832,GO:0045892,GO:0031347,GO:0002237,GO:0009751,GO:0009611	nucleus|DNA-binding transcription factor activity|transcription cis-regulatory region binding|defense response to bacterium|defense response to fungus|negative regulation of DNA-templated transcription|regulation of defense response|response to molecule of bacterial origin|response to salicylic acid|response to wounding
J2O13_03G005196	54.6439	30.8048	78.4831	2.54783	1.34927	0.000491911	0.00195736	Up	1.22865	2.03822	2.14694	0.564548	0.52294	0.666622
J2O13_03G005200	1631.8	901.973	2361.62	2.61707	1.38795	3.22E-22	1.76E-20	Up	29.8085	26.718	29.652	7.41935	8.90737	10.959	GAPN	NADP-dependent glyceraldehyde-3-phosphate dehydrogenase	ko00010,ko00030	Glycolysis / Gluconeogenesis|Pentose phosphate pathway	GO:0005737,GO:0008886	cytoplasm|glyceraldehyde-3-phosphate dehydrogenase (NADP+) (non-phosphorylating) activity
J2O13_03G005209	22.5668	0.618178	44.5155	67.3854	6.07436	9.70E-07	7.01E-06	Up	2.03664	0.951759	1.92596	0	0	0.0608883	ZFP3	Zinc finger protein 3			GO:0005634,GO:0003700,GO:0046872,GO:0000976,GO:0009738,GO:0009788,GO:0006355	nucleus|DNA-binding transcription factor activity|metal ion binding|transcription cis-regulatory region binding|abscisic acid-activated signaling pathway|negative regulation of abscisic acid-activated signaling pathway|regulation of DNA-templated transcription
J2O13_03G005242	53.4521	79.7067	27.1975	0.3416	-1.54962	0.000362878	0.00149906	Down	0.13103	0.183175	0.28737	0.404837	0.41827	0.639831	SPS1	Probable sucrose-phosphate synthase 1	ko00500	Starch and sucrose metabolism	GO:0016157,GO:0046524,GO:0005986	sucrose synthase activity|sucrose-phosphate synthase activity|sucrose biosynthetic process
J2O13_03G005251	755.132	233.636	1276.63	5.47167	2.45198	1.72E-21	8.78E-20	Up	21.5455	18.9815	22.101	3.82257	3.12252	2.37134	APT5	Adenine phosphoribosyltransferase 5	ko00230	Purine metabolism	GO:0005829,GO:0003999,GO:0006168,GO:0044209,GO:0006166	cytosol|adenine phosphoribosyltransferase activity|adenine salvage|AMP salvage|purine ribonucleoside salvage
J2O13_03G005255	37161.5	51778.4	22544.6	0.435406	-1.19957	2.02E-06	1.37E-05	Down	193.943	258.104	194.339	455.083	439.959	315.678	UGNT1	UDP-N-acetylglucosamine transporter UGNT1			GO:0000139,GO:0015297,GO:0005338,GO:0005461,GO:0005463,GO:0005462,GO:0008643,GO:1990569	Golgi membrane|antiporter activity|nucleotide-sugar transmembrane transporter activity|UDP-glucuronic acid transmembrane transporter activity|UDP-N-acetylgalactosamine transmembrane transporter activity|UDP-N-acetylglucosamine transmembrane transporter activity|carbohydrate transport|UDP-N-acetylglucosamine transmembrane transport
J2O13_03G005256	1522.13	992.886	2051.37	2.06649	1.04718	1.34E-08	1.36E-07	Up	7.20854	5.92767	8.88196	2.8659	2.9266	2.95495	At1g56130	Probable LRR receptor-like serine/threonine-protein kinase At1g56130			GO:0005886,GO:0005524,GO:0106310,GO:0004674,GO:0006468	plasma membrane|ATP binding|protein serine kinase activity|protein serine/threonine kinase activity|protein phosphorylation
J2O13_03G005267	6664.24	4203.55	9124.93	2.17091	1.1183	3.40E-07	2.68E-06	Up	54.9564	72.3999	66.2227	25.9407	26.7731	20.0905	EBF1	EIN3-binding F-box protein 1	ko04016,ko04075	MAPK signaling pathway - plant|Plant hormone signal transduction	GO:0005737,GO:0005634,GO:0019005,GO:0009873,GO:0010105,GO:0016567,GO:0009723,GO:0031146,GO:0006511	cytoplasm|nucleus|SCF ubiquitin ligase complex|ethylene-activated signaling pathway|negative regulation of ethylene-activated signaling pathway|protein ubiquitination|response to ethylene|SCF-dependent proteasomal ubiquitin-dependent protein catabolic process|ubiquitin-dependent protein catabolic process
J2O13_03G005269	663.727	224.422	1103.03	4.91196	2.2963	0.00133983	0.0047335	Up	22.985	26.8445	31.259	1.78403	1.31353	11.2237	SHN2	Ethylene-responsive transcription factor SHINE 2			GO:0005634,GO:0003677,GO:0003700,GO:0009873	nucleus|DNA binding|DNA-binding transcription factor activity|ethylene-activated signaling pathway
J2O13_03G005272	1900.78	2701.2	1100.37	0.407401	-1.29548	0.000157946	0.000712094	Down	21.3589	15.356	19.1933	45.8155	42.3306	22.8195	SPX2	SPX domain-containing protein 2			GO:0005634,GO:0071456,GO:0016036	nucleus|cellular response to hypoxia|cellular response to phosphate starvation
J2O13_03G005273	1523.35	2346.52	700.179	0.298341	-1.74497	1.89E-25	1.37E-23	Down	10.9603	12.619	9.48574	30.9111	29.8606	30.4128	CXE17	Probable carboxylesterase 17			GO:0106435	carboxylesterase activity
J2O13_03G005281	393.369	591.434	195.304	0.329912	-1.59985	2.09E-15	5.51E-14	Down	1.34333	1.47379	1.15115	2.66648	3.37414	3.93013
J2O13_03G005305	4930.38	2471.98	7388.78	2.98878	1.57956	0.00126812	0.00450699	Up	28.1871	36.7431	41.3035	5.59911	5.06417	19.6695	ABCG32	ABC transporter G family member 32	ko02010	ABC transporters	GO:0005777,GO:0005886,GO:0140359,GO:0005524,GO:0080051	peroxisome|plasma membrane|ABC-type transporter activity|ATP binding|cutin transport
J2O13_03G005308	155.393	44.8201	265.966	5.91926	2.56542	2.37E-09	2.70E-08	Up	17.2123	10.2968	16.1559	1.7598	1.15517	3.26228	CDT3	Protein CADMIUM TOLERANCE 3			GO:0009505,GO:0005886,GO:0046872,GO:0140487,GO:0055079,GO:1990748,GO:0071585,GO:0010273,GO:0010044,GO:0046686	plant-type cell wall|plasma membrane|metal ion binding|metal ion sequestering activity|aluminum ion homeostasis|cellular detoxification|detoxification of cadmium ion|detoxification of copper ion|response to aluminum ion|response to cadmium ion
J2O13_03G005322	81.1814	30.2782	132.085	4.37054	2.12781	0.00021525	0.000936548	Up	15.6728	10.0293	15.8901	2.04252	4.4303	1.2164	DVL10	Small polypeptide DEVIL 10			GO:0005886,GO:0071456,GO:0008285,GO:0048367	plasma membrane|cellular response to hypoxia|negative regulation of cell population proliferation|shoot system development
J2O13_03G005333	46.1223	14.5695	77.675	5.29833	2.40554	3.46E-09	3.85E-08	Up	1.51034	1.44949	1.16676	0.165286	0.187403	0.294024	LRX4	Leucine-rich repeat extensin-like protein 4			GO:0005576,GO:0009505,GO:0009506,GO:0005199,GO:0071555	extracellular region|plant-type cell wall|plasmodesma|structural constituent of cell wall|cell wall organization
J2O13_03G005334	288.483	34.2203	542.745	15.8374	3.98527	9.75E-05	0.000462095	Up	12.3261	0.35507	4.38562	0.124281	0.204399	0.590601	SULTR35	Probable sulfate transporter 3.5			GO:0005886,GO:0008271,GO:0015293	plasma membrane|secondary active sulfate transmembrane transporter activity|symporter activity
J2O13_03G005336	80.3258	25.8617	134.79	5.21201	2.38184	3.29E-05	0.000172815	Up	9.66481	5.75076	6.37521	0.593917	2.01619	0.804571
J2O13_03G005341	33.0504	12.2762	53.8246	4.40433	2.13892	0.000819144	0.00307188	Up	1.22714	0.679334	1.43755	0.192488	0.318974	0.102724	AOP1.2	Probable 2-oxoglutarate-dependent dioxygenase AOP1.2			GO:0051213,GO:0046872	dioxygenase activity|metal ion binding
J2O13_03G005342	190.758	9.63456	371.882	38.3188	5.25998	1.13E-05	6.57E-05	Up	7.63906	5.26587	8.48684	0.0162182	0	0.476029	AOP1	Probable 2-oxoglutarate-dependent dioxygenase AOP1			GO:0051213,GO:0046872	dioxygenase activity|metal ion binding
J2O13_03G005343	3.0983	0	6.19659	33.4284	5.063	0.00824851	0.022865	Up	0.433014	0.435842	0.486415	0	0	0
J2O13_03G005363	10956.7	5020.74	16892.6	3.3644	1.75035	8.75E-15	2.14E-13	Up	113.352	174.871	139.311	29.6567	30.8339	45.2489	RZFP34	Probable E3 ubiquitin-protein ligase RZFP34	ko04120,ko04115,ko05162	Ubiquitin mediated proteolysis|p53 signaling pathway|Measles	GO:0005634,GO:0061630,GO:0008270,GO:0016567,GO:0006511	nucleus|ubiquitin protein ligase activity|zinc ion binding|protein ubiquitination|ubiquitin-dependent protein catabolic process
J2O13_03G005375	533.817	747.099	320.534	0.429139	-1.22048	0.00507918	0.0150291	Down	3.05212	2.71758	2.99959	6.65979	7.18979	2.60028	GLB3	Two-on-two hemoglobin-3			GO:0020037,GO:0046872,GO:0019825,GO:0005344,GO:0015671,GO:0009733,GO:0001666	heme binding|metal ion binding|oxygen binding|oxygen carrier activity|oxygen transport|response to auxin|response to hypoxia
J2O13_03G005379	2131.78	1137.83	3125.73	2.74733	1.45803	2.41E-29	2.53E-27	Up	7.27667	8.95473	8.6674	2.4548	2.33998	2.67471	TEB	Helicase and polymerase-containing protein TEBICHI			GO:0005524,GO:0003677,GO:0003887,GO:0004386,GO:0016787,GO:0007049,GO:0051301,GO:0006261,GO:0006302,GO:1990067,GO:0009933,GO:0009640,GO:2000011,GO:1902749,GO:0010468	ATP binding|DNA binding|DNA-directed DNA polymerase activity|helicase activity|hydrolase activity|cell cycle|cell division|DNA-templated DNA replication|double-strand break repair|intrachromosomal DNA recombination|meristem structural organization|photomorphogenesis|regulation of adaxial/abaxial pattern formation|regulation of cell cycle G2/M phase transition|regulation of gene expression
J2O13_03G005387	21.2042	32.5875	9.8209	0.300925	-1.73252	0.00869286	0.0239551	Down	0.0884219	0.0667495	0.0638527	0.220656	0.0907255	0.296072	PERK1	Proline-rich receptor-like protein kinase PERK1			GO:0005886,GO:0005524,GO:0004672,GO:0106310,GO:0004674,GO:0046777,GO:0009620,GO:0009611	plasma membrane|ATP binding|protein kinase activity|protein serine kinase activity|protein serine/threonine kinase activity|protein autophosphorylation|response to fungus|response to wounding
J2O13_03G005389	7286.83	10339.2	4234.5	0.409567	-1.28783	4.66E-05	0.000236674	Down	29.4645	35.6138	30.4583	73.2567	75.8304	39.9827	At5g25630	Pentatricopeptide repeat-containing protein At5g25630
J2O13_03G005391	1760.9	1026.1	2495.71	2.43163	1.28192	2.44E-13	4.89E-12	Up	20.2136	15.9437	20.6999	5.57415	5.7795	8.03265	At2g25737	Sulfite exporter TauE/SafE family protein 3			GO:0031464,GO:0016020,GO:0016567	Cul4A-RING E3 ubiquitin ligase complex|membrane|protein ubiquitination
J2O13_03G005398	122.852	57.6916	188.012	3.24891	1.69996	5.47E-10	6.84E-09	Up	2.52524	2.32014	2.53118	0.531836	0.488974	0.867232	DAAT	D-amino-acid transaminase, chloroplastic	ko00790	Folate biosynthesis	GO:0009507,GO:0009570,GO:0008696,GO:0047810,GO:0019752,GO:0008153,GO:0046654	chloroplast|chloroplast stroma|4-amino-4-deoxychorismate lyase activity|D-alanine:2-oxoglutarate aminotransferase activity|carboxylic acid metabolic process|para-aminobenzoic acid biosynthetic process|tetrahydrofolate biosynthetic process
J2O13_03G005409	790.42	1312.45	268.388	0.204454	-2.29015	2.93E-12	5.13E-11	Down	3.094	5.77634	4.64476	14.09	14.8285	26.4011	BSPA	Bark storage protein A			GO:0003824,GO:0045735,GO:0009116	catalytic activity|nutrient reservoir activity|nucleoside metabolic process
J2O13_03G005410	14.5476	24.1396	4.95564	0.204759	-2.288	0.00562827	0.0164229	Down	0.066671	0.029825	0.0142654	0.152116	0.188502	0.0992182	NPF1.2	Protein NRT1/ PTR FAMILY 1.2			GO:0016020,GO:0005634,GO:0005886,GO:0080054,GO:0022857,GO:0015706,GO:0055085	membrane|nucleus|plasma membrane|low-affinity nitrate transmembrane transporter activity|transmembrane transporter activity|nitrate transmembrane transport|transmembrane transport
J2O13_03G005414	2107.46	3117.39	1097.54	0.352118	-1.50587	4.70E-33	6.70E-31	Down	12.7523	10.3186	12.9456	26.536	27.3064	30.457	At1g67280	Probable lactoylglutathione lyase, chloroplastic	ko00620	Pyruvate metabolism	GO:0009507,GO:0009570,GO:0005737,GO:0005739,GO:0010319,GO:0009579,GO:0031977,GO:0004462,GO:0046872,GO:0019243,GO:0009409	chloroplast|chloroplast stroma|cytoplasm|mitochondrion|stromule|thylakoid|thylakoid lumen|lactoylglutathione lyase activity|metal ion binding|methylglyoxal catabolic process to D-lactate via S-lactoyl-glutathione|response to cold
J2O13_03G005422	1834.76	968.71	2700.8	2.78878	1.47964	1.24E-08	1.26E-07	Up	18.5943	17.2589	17.2286	5.54738	6.19041	3.7487	HSL2	LRR receptor-like serine/threonine-protein kinase HSL2			GO:0005886,GO:0005524,GO:0106310,GO:0004674,GO:0050829,GO:0010102,GO:0060866,GO:0006468,GO:0010468	plasma membrane|ATP binding|protein serine kinase activity|protein serine/threonine kinase activity|defense response to Gram-negative bacterium|lateral root morphogenesis|leaf abscission|protein phosphorylation|regulation of gene expression
J2O13_03G005425	104.843	200.921	8.76428	0.0438185	-4.51231	9.98E-29	1.00E-26	Down	0.244013	0.280693	0.402768	6.20364	6.06611	5.0774	AHP4	Histidine-containing phosphotransfer protein 4	ko04075	Plant hormone signal transduction	GO:0005737,GO:0005829,GO:0005634,GO:0009927,GO:0043424,GO:0009736,GO:0000160,GO:0016310	cytoplasm|cytosol|nucleus|histidine phosphotransfer kinase activity|protein histidine kinase binding|cytokinin-activated signaling pathway|phosphorelay signal transduction system|phosphorylation
J2O13_03G005433	257.61	405.23	109.99	0.271346	-1.8818	1.22E-20	5.71E-19	Down	2.07012	1.83158	1.65565	5.39925	6.01586	5.40831	LFS	Lachrymatory-factor synthase			GO:0005773,GO:0043086	vacuole|negative regulation of catalytic activity
J2O13_03G005440	1425	834.634	2015.36	2.41396	1.2714	0.000151199	0.000683756	Up	12.0876	10.8071	14.9852	2.97382	3.1785	7.04304	ATHB-8	Homeobox-leucine zipper protein ATHB-8			GO:0005634,GO:0003700,GO:0008289,GO:0000976,GO:0030154,GO:0010014,GO:0045597,GO:0008284,GO:0010072,GO:0010067,GO:0009733,GO:0010089	nucleus|DNA-binding transcription factor activity|lipid binding|transcription cis-regulatory region binding|cell differentiation|meristem initiation|positive regulation of cell differentiation|positive regulation of cell population proliferation|primary shoot apical meristem specification|procambium histogenesis|response to auxin|xylem development
J2O13_03G005461	7884.43	10693.7	5075.17	0.474606	-1.0752	6.21E-07	4.66E-06	Down	50.2257	59.0963	53.0818	102.883	101.056	75.2225	SIGC	RNA polymerase sigma factor sigC			GO:0009507,GO:0003899,GO:0016987,GO:0000976,GO:0071482,GO:0006352,GO:2001141	chloroplast|DNA-directed 5'-3' RNA polymerase activity|sigma factor activity|transcription cis-regulatory region binding|cellular response to light stimulus|DNA-templated transcription initiation|regulation of RNA biosynthetic process
J2O13_03G005462	1963.62	1009.22	2918.01	2.89195	1.53204	4.52E-07	3.48E-06	Up	84.0723	63.3052	69.7599	21.8822	25.2889	13.7998	At2g19810	Zinc finger CCCH domain-containing protein 20			GO:0005886,GO:0003677,GO:0003700,GO:0046872,GO:0051607,GO:0006355,GO:0006979	plasma membrane|DNA binding|DNA-binding transcription factor activity|metal ion binding|defense response to virus|regulation of DNA-templated transcription|response to oxidative stress
J2O13_03G005463	56.8926	1.68096	112.104	66.8158	6.06212	5.41E-10	6.78E-09	Up	5.25327	0.996209	2.37022	0.0434268	0.0208314	0.042488	RAX2	Transcription factor RAX2			GO:0005634,GO:0003677,GO:0003700,GO:0009785	nucleus|DNA binding|DNA-binding transcription factor activity|blue light signaling pathway
J2O13_03G005464	98.8832	145.832	51.9344	0.356465	-1.48817	0.00216974	0.00719599	Down	2.91289	1.46595	1.98664	6.81908	4.51637	3.11571
J2O13_03G005471	54.2918	82.1173	26.4662	0.321469	-1.63725	0.00164156	0.00565484	Down	0.588004	1.10649	0.344619	1.55303	1.63684	2.07588
J2O13_03G005473	1675.74	2642.5	708.98	0.268262	-1.89828	3.26E-09	3.65E-08	Down	95.5955	113.689	90.966	249.804	203.008	488.456
J2O13_03G005485	444.867	255.017	634.716	2.48692	1.31436	4.04E-14	9.03E-13	Up	20.5412	17.5562	18.6414	5.05027	6.73474	7.06577			ko00190,ko04714	Oxidative phosphorylation|Thermogenesis
J2O13_03G005488	1302.61	2070.46	534.768	0.258319	-1.95277	1.48E-10	2.01E-09	Down	4.29487	2.30976	3.5618	11.4156	12.079	8.57083	ATH1	Homeobox protein ATH1			GO:0005634,GO:0003677,GO:0003700,GO:0000981,GO:0000978,GO:0043565,GO:0010227,GO:0010073,GO:0008285,GO:0009640,GO:0010371,GO:0006357,GO:0090470,GO:0010228	nucleus|DNA binding|DNA-binding transcription factor activity|DNA-binding transcription factor activity, RNA polymerase II-specific|RNA polymerase II cis-regulatory region sequence-specific DNA binding|sequence-specific DNA binding|floral organ abscission|meristem maintenance|negative regulation of cell population proliferation|photomorphogenesis|regulation of gibberellin biosynthetic process|reg…
J2O13_03G005489	168.062	261.4	74.7241	0.285811	-1.80687	4.50E-07	3.47E-06	Down	1.68061	3.65934	2.41075	7.86454	7.5451	6.83321	PYL2	Abscisic acid receptor PYL2	ko04016,ko04075	MAPK signaling pathway - plant|Plant hormone signal transduction	GO:0005737,GO:0005634,GO:0005886,GO:0062049,GO:0010427,GO:0042802,GO:0042803,GO:0004864,GO:0038023,GO:0009738,GO:0080163	cytoplasm|nucleus|plasma membrane|protein phosphatase inhibitor complex|abscisic acid binding|identical protein binding|protein homodimerization activity|protein phosphatase inhibitor activity|signaling receptor activity|abscisic acid-activated signaling pathway|regulation of protein serine/threonine phosphatase activity
J2O13_03G005499	110000	158055	61944.8	0.391919	-1.35137	3.40E-06	2.21E-05	Down	344.138	468.996	360.352	946.019	916.747	571.193	GDCSP	Glycine dehydrogenase (decarboxylating), mitochondrial	ko00630,ko00260	Glyoxylate and dicarboxylate metabolism|Glycine, serine and threonine metabolism	GO:0005960,GO:0005739,GO:0016594,GO:0004375,GO:0030170,GO:0019464,GO:1901566	glycine cleavage complex|mitochondrion|glycine binding|glycine dehydrogenase (decarboxylating) activity|pyridoxal phosphate binding|glycine decarboxylation via glycine cleavage system|organonitrogen compound biosynthetic process
J2O13_03G005500	2800.39	3795.66	1805.12	0.475504	-1.07247	3.76E-18	1.36E-16	Down	57.4391	53.344	51.0291	86.7884	83.8707	111.134	GATA21	GATA transcription factor 21			GO:0005634,GO:0003700,GO:0000976,GO:0008270,GO:0010151,GO:0009658,GO:0007623,GO:0009736,GO:0009740,GO:0010255,GO:0009910,GO:0009938,GO:0010187,GO:0090693,GO:1902326,GO:0043610,GO:0010380,GO:0006355,GO:0010468,GO:0051171,GO:2000028,GO:0080050,GO:0010029,GO:0009733,GO:0009735,GO:0009739,GO:0009416	nucleus|DNA-binding transcription factor activity|transcription cis-regulatory region binding|zinc ion binding|chloroplast elongation|chloroplast organization|circadian rhythm|cytokinin-activated signaling pathway|gibberellic acid mediated signaling pathway|glucose mediated signaling pathway|negative regulation of flower development|negative regulation of gibberellic acid mediated signaling pathw…
J2O13_03G005502	3.1866	6.03693	0.336275	0.0581699	-4.10358	0.0162209	0.0407833	Down	0	0.0525308	0	0.223268	0.299878	0.262129
J2O13_03G005504	1216.57	1941.27	491.868	0.253395	-1.98054	0.000411125	0.00167238	Down	6.53657	6.23942	7.36003	26.0798	31.173	6.26313	IRT3	Fe(2+) transport protein 3, chloroplastic	ko05010,ko05012	Alzheimer disease|Parkinson disease	GO:0009535,GO:0016020,GO:0000325,GO:0005886,GO:0005381,GO:0005385,GO:0055072,GO:0006826,GO:0009624,GO:0071577,GO:0006829	chloroplast thylakoid membrane|membrane|plant-type vacuole|plasma membrane|iron ion transmembrane transporter activity|zinc ion transmembrane transporter activity|iron ion homeostasis|iron ion transport|response to nematode|zinc ion transmembrane transport|zinc ion transport
J2O13_03G005505	3344.21	4624.2	2064.21	0.446404	-1.16358	2.65E-13	5.31E-12	Down	52.9197	69.28	59.9043	116.76	106.492	112.089	A70	Pathogen-associated molecular patterns-induced protein A70			GO:0016020,GO:0042742,GO:0009617,GO:0009753,GO:0009611	membrane|defense response to bacterium|response to bacterium|response to jasmonic acid|response to wounding
J2O13_03G005508	284.005	421.741	146.268	0.346724	-1.52814	2.68E-10	3.52E-09	Down	1.15098	1.81765	1.42349	3.12411	3.75467	3.55494
J2O13_03G005511	1165.35	2031.71	298.999	0.147192	-2.76423	2.38E-27	2.13E-25	Down	3.0722	3.1558	3.3025	19.5881	19.9498	13.1405	At1g68400	Probable leucine-rich repeat receptor-like protein kinase At1g68400			GO:0005886,GO:0005524,GO:0106310,GO:0004674,GO:0006468	plasma membrane|ATP binding|protein serine kinase activity|protein serine/threonine kinase activity|protein phosphorylation
J2O13_03G005512	13.4629	25.3243	1.60144	0.0640123	-3.96551	2.10E-05	0.000114786	Down	0.0362497	0	0.0523545	0.310151	0.386818	0.455169	LBD7	LOB domain-containing protein 7
J2O13_03G005513	3370.44	4702.66	2038.22	0.433388	-1.20627	2.78E-05	0.000148139	Down	20.3424	21.0589	19.2366	31.5054	26.386	59.5592		Acyl-lipid (9-3)-desaturase OS=Borago officinalis OX=13363 PE=1 SV=1			GO:0005789,GO:0046872,GO:0016491,GO:0006636	endoplasmic reticulum membrane|metal ion binding|oxidoreductase activity|unsaturated fatty acid biosynthetic process
J2O13_03G005520	1138.08	1808.74	467.419	0.258382	-1.95242	1.56E-13	3.23E-12	Down	3.5009	3.65629	3.81084	9.0457	9.04703	17.4604	CYP711A1	Cytochrome P450 711A1			GO:0016020,GO:0020037,GO:0005506,GO:0004497,GO:0016705,GO:0009926,GO:0016117,GO:0009963,GO:0009934,GO:0010223	membrane|heme binding|iron ion binding|monooxygenase activity|oxidoreductase activity, acting on paired donors, with incorporation or reduction of molecular oxygen|auxin polar transport|carotenoid biosynthetic process|positive regulation of flavonoid biosynthetic process|regulation of meristem structural organization|secondary shoot formation
J2O13_03G005522	1275.13	1796.88	753.378	0.419316	-1.25389	0.00081188	0.00304784	Down	7.52428	8.13441	7.89072	18.2535	18.8592	8.2253	IQM4	IQ domain-containing protein IQM4			GO:0009507,GO:0005634,GO:0005516,GO:0071456,GO:0009737,GO:0009651	chloroplast|nucleus|calmodulin binding|cellular response to hypoxia|response to abscisic acid|response to salt stress
J2O13_03G005536	454.962	184.628	725.296	3.92431	1.97244	4.20E-08	3.93E-07	Up	15.6614	10.6582	14.3844	1.52055	3.13031	4.01363	At3g55350	Protein ALP1-like			GO:0000118,GO:0046872,GO:0004518	histone deacetylase complex|metal ion binding|nuclease activity
J2O13_03G005545	2756.1	280.661	5231.53	18.6445	4.22068	8.89E-25	6.02E-23	Up	156.229	69.1768	57.2917	4.60453	4.03592	3.80155	HSP17.9-D	17.9 kDa class II heat shock protein	ko04141	Protein processing in endoplasmic reticulum	GO:0005737,GO:0043621,GO:0051082,GO:0051259,GO:0006457,GO:0009408,GO:0042542,GO:0009651	cytoplasm|protein self-association|unfolded protein binding|protein complex oligomerization|protein folding|response to heat|response to hydrogen peroxide|response to salt stress
J2O13_03G005546	18.774	3.07574	34.4723	11.2686	3.49424	0.00245001	0.00798136	Up	4.21467	1.39469	0.389132	0.24699	0.0473915	0.14499	HSP17.6	17.6 kDa class II heat shock protein	ko04141	Protein processing in endoplasmic reticulum	GO:0005737,GO:0043621,GO:0051082,GO:0071456,GO:0051259,GO:0006457,GO:0009408,GO:0042542,GO:0009651	cytoplasm|protein self-association|unfolded protein binding|cellular response to hypoxia|protein complex oligomerization|protein folding|response to heat|response to hydrogen peroxide|response to salt stress
J2O13_03G005549	1433.12	902.269	1963.97	2.17626	1.12185	2.66E-15	6.90E-14	Up	37.0553	41.767	45.8639	14.5707	14.082	18.7446	AL5	PHD finger protein ALFIN-LIKE 5			GO:0005634,GO:0003677,GO:0042393,GO:0046872,GO:0000976,GO:0003712,GO:0003714,GO:0006325,GO:0009651,GO:0009414	nucleus|DNA binding|histone binding|metal ion binding|transcription cis-regulatory region binding|transcription coregulator activity|transcription corepressor activity|chromatin organization|response to salt stress|response to water deprivation
J2O13_03G005555	52.742	10.3723	95.1117	9.08957	3.18421	0.000995195	0.00365365	Up	1.83177	2.24023	1.59304	0.0168522	0.0646706	0.461661	At3g13980	Protein BIG GRAIN 1-like A			GO:0005886,GO:0060918,GO:0009734,GO:0010929	plasma membrane|auxin transport|auxin-activated signaling pathway|positive regulation of auxin mediated signaling pathway
J2O13_03G005563	5099.25	8167.99	2030.52	0.248593	-2.00814	1.15E-28	1.15E-26	Down	21.3731	23.3976	19.5114	76.3872	72.5288	62.7996	ndhU	NAD(P)H-quinone oxidoreductase subunit U, chloroplastic			GO:0009507,GO:0009535,GO:0010598,GO:0009536,GO:0048038	chloroplast|chloroplast thylakoid membrane|NAD(P)H dehydrogenase complex (plastoquinone)|plastid|quinone binding
J2O13_03G005565	46.0687	88.589	3.54834	0.040308	-4.63279	2.07E-08	2.03E-07	Down	0.0474536	0.0716452	0.137072	2.47666	1.96707	0.655436	MYB123	Transcription factor MYB123			GO:0005634,GO:0003677,GO:0031542,GO:0045893	nucleus|DNA binding|positive regulation of anthocyanin biosynthetic process|positive regulation of DNA-templated transcription
J2O13_03G005569	561.545	751.618	371.473	0.494424	-1.01618	6.50E-05	0.0003203	Down	3.1612	2.61896	2.96149	5.36953	5.31719	3.71253	CYP72A616	Cytochrome P450 CYP72A616			GO:0016020,GO:0020037,GO:0005506,GO:0004497,GO:0016705,GO:0008203,GO:0016135,GO:0006694	membrane|heme binding|iron ion binding|monooxygenase activity|oxidoreductase activity, acting on paired donors, with incorporation or reduction of molecular oxygen|cholesterol metabolic process|saponin biosynthetic process|steroid biosynthetic process
J2O13_03G005572	661.414	928.887	393.941	0.424025	-1.23778	0.0036566	0.0113062	Down	3.27516	9.26978	4.09684	10.7298	8.92683	12.9349	CKX7	Cytokinin dehydrogenase 7	ko00908	Zeatin biosynthesis	GO:0019139,GO:0071949,GO:0016491,GO:0009823	cytokinin dehydrogenase activity|FAD binding|oxidoreductase activity|cytokinin catabolic process
J2O13_03G005578	6667.84	9673.19	3662.5	0.378633	-1.40113	2.90E-31	3.68E-29	Down	28.4086	28.9865	27.3826	64.7033	58.63	60.5848	YLMG2	YlmG homolog protein 2, chloroplastic			GO:0009535,GO:0010020,GO:0090143	chloroplast thylakoid membrane|chloroplast fission|nucleoid organization
J2O13_03G005579	32.5646	15.647	49.4821	3.17845	1.66833	0.000175064	0.000781755	Up	2.30564	2.50271	1.95881	0.696245	0.593746	0.45413	YLMG2	YlmG homolog protein 2, chloroplastic			GO:0009535,GO:0010020,GO:0090143	chloroplast thylakoid membrane|chloroplast fission|nucleoid organization
J2O13_03G005582	80.9646	124.097	37.8322	0.304861	-1.71378	0.00144406	0.00505662	Down	1.16844	1.44747	0.807712	3.58869	3.95936	1.52984	AGL65	Agamous-like MADS-box protein AGL65			GO:0005634,GO:0003700,GO:0000981,GO:0046983,GO:0000978,GO:0009555,GO:0010152,GO:0045944,GO:0080092,GO:0006357	nucleus|DNA-binding transcription factor activity|DNA-binding transcription factor activity, RNA polymerase II-specific|protein dimerization activity|RNA polymerase II cis-regulatory region sequence-specific DNA binding|pollen development|pollen maturation|positive regulation of transcription by RNA polymerase II|regulation of pollen tube growth|regulation of transcription by RNA polymerase II
J2O13_03G005585	515.036	172.052	858.021	4.9911	2.31936	4.30E-06	2.74E-05	Up	24.8831	20.8467	17.5932	4.3832	4.50553	1.30696	O3L2	Protein OXIDATIVE STRESS 3 LIKE 2			GO:0005634,GO:0000325	nucleus|plant-type vacuole
J2O13_03G005591	630.442	406.253	854.632	2.10406	1.07317	0.013493	0.0348535	Up	47.2146	83.4233	34.7748	22.7231	27.0131	14.3379	COPT5.1	Copper transporter 5.1	ko04978,ko01524	Mineral absorption|Platinum drug resistance	GO:0005886,GO:0005375,GO:0006878	plasma membrane|copper ion transmembrane transporter activity|cellular copper ion homeostasis
J2O13_03G005600	3.70009	0	7.40019	39.9594	5.32046	0.00644499	0.0184396	Up	0.200818	0.134753	0.418942	0	0	0	ERF016	Ethylene-responsive transcription factor ERF016			GO:0005634,GO:0003677,GO:0003700,GO:0009873	nucleus|DNA binding|DNA-binding transcription factor activity|ethylene-activated signaling pathway
J2O13_03G005607	2657.41	3778.59	1536.22	0.406575	-1.29841	0.0026783	0.00861788	Down	16.0147	17.3366	15.1286	40.8654	40.6347	14.4358
J2O13_03G005611	6751.17	3445.61	10056.7	2.91896	1.54546	2.16E-19	9.00E-18	Up	198.674	223.564	203.26	58.5832	65.0566	51.8311	TIFY3B	Protein TIFY 3B	ko04075	Plant hormone signal transduction	GO:0005634,GO:0006952,GO:0031347,GO:2000022,GO:0009611	nucleus|defense response|regulation of defense response|regulation of jasmonic acid mediated signaling pathway|response to wounding
J2O13_03G005621	1809.3	456.76	3161.85	6.92024	2.79082	0.000230453	0.000995166	Up	39.8914	36.9953	40.0074	1.36774	1.28214	12.0947	PMEU1	Pectinesterase/pectinesterase inhibitor U1	ko00040,ko02020	Pentose and glucuronate interconversions|Two-component system	GO:0005576,GO:0045330,GO:0030599,GO:0046910,GO:0042545,GO:0045490	extracellular region|aspartyl esterase activity|pectinesterase activity|pectinesterase inhibitor activity|cell wall modification|pectin catabolic process
J2O13_03G005622	1495.91	565.461	2426.35	4.29288	2.10195	3.49E-50	1.64E-47	Up	6.08354	5.08624	5.62218	1.0457	1.12511	1.04222	PME12	Probable pectinesterase/pectinesterase inhibitor 12			GO:0005576,GO:0045330,GO:0030599,GO:0046910,GO:0042545,GO:0045490,GO:0009617	extracellular region|aspartyl esterase activity|pectinesterase activity|pectinesterase inhibitor activity|cell wall modification|pectin catabolic process|response to bacterium
J2O13_03G005623	139.048	77.7512	200.345	2.57755	1.366	2.28E-07	1.85E-06	Up	2.4968	3.09065	3.8375	0.902266	1.04383	1.06451	LKR/SDH	Alpha-aminoadipic semialdehyde synthase			GO:0005737,GO:0047131,GO:0047130,GO:0004753,GO:0033512,GO:0019878	cytoplasm|saccharopine dehydrogenase (NAD+, L-glutamate-forming) activity|saccharopine dehydrogenase (NADP+, L-lysine-forming) activity|saccharopine dehydrogenase activity|L-lysine catabolic process to acetyl-CoA via saccharopine|lysine biosynthetic process via aminoadipic acid
J2O13_03G005635	33.1045	2.68394	63.5251	23.6857	4.56595	4.42E-10	5.63E-09	Up	9.94482	8.14127	7.40495	0.453799	0	0.44399	SUS4	Sucrose synthase 4	ko00500	Starch and sucrose metabolism	GO:0005773,GO:0016157,GO:0071456,GO:0001666,GO:0005985	vacuole|sucrose synthase activity|cellular response to hypoxia|response to hypoxia|sucrose metabolic process
J2O13_03G005644	12739.9	19368.7	6111.22	0.315506	-1.66426	8.17E-57	6.33E-54	Down	128.343	133.234	120.453	313.526	303.69	384.417	PRXQ	Peroxiredoxin Q, chloroplastic			GO:0009543,GO:0140824	chloroplast thylakoid lumen|thioredoxin-dependent peroxiredoxin activity
J2O13_03G005656	95.6304	55.4868	135.774	2.44876	1.29205	1.63E-07	1.36E-06	Up	1.85302	2.01709	1.77096	0.598941	0.676015	0.620464	ERF017	Ethylene-responsive transcription factor ERF017			GO:0005634,GO:0003700,GO:0000976,GO:0009873	nucleus|DNA-binding transcription factor activity|transcription cis-regulatory region binding|ethylene-activated signaling pathway
J2O13_03G005657	11.7357	19.1654	4.30604	0.22406	-2.15804	0.0141687	0.0363251	Down	0.0303122	0.0533927	0.014593	0.136158	0.155509	0.0634358	BGAL7	Beta-galactosidase 7			GO:0048046,GO:0005773,GO:0004565,GO:0030246,GO:0005975	apoplast|vacuole|beta-galactosidase activity|carbohydrate binding|carbohydrate metabolic process
J2O13_03G005661	1386.03	519.422	2252.64	4.33603	2.11637	1.61E-20	7.44E-19	Up	31.4142	29.4674	30.2857	4.17286	7.27187	5.8835	TIFY10A	Protein TIFY 10A	ko04075	Plant hormone signal transduction	GO:0005634,GO:0005886,GO:0042802,GO:0042742,GO:0009908,GO:0009867,GO:0009555,GO:1900067,GO:0031347,GO:2000022,GO:0009753,GO:0009611	nucleus|plasma membrane|identical protein binding|defense response to bacterium|flower development|jasmonic acid mediated signaling pathway|pollen development|regulation of cellular response to alkaline pH|regulation of defense response|regulation of jasmonic acid mediated signaling pathway|response to jasmonic acid|response to wounding
J2O13_03G005674	246.288	92.9318	399.644	4.30946	2.10751	4.65E-14	1.03E-12	Up	23.4865	25.3415	24.2417	6.04398	3.41962	4.44763
J2O13_03G005675	75.8326	32.3063	119.359	3.69109	1.88405	0.000344708	0.00143197	Up	2.36064	0.829143	1.25485	0.326105	0.232121	0.442561	CCX4	Cation/calcium exchanger 4			GO:0016020,GO:0015297,GO:0008324,GO:0006812,GO:0010150,GO:0006813,GO:0006814	membrane|antiporter activity|cation transmembrane transporter activity|cation transport|leaf senescence|potassium ion transport|sodium ion transport
J2O13_03G005681	5.18088	0	10.3618	55.9181	5.80524	0.00238194	0.0077938	Up	1.53961	0.309932	1.38358	0	0	0	SBT1.8	Subtilisin-like protease SBT1.8			GO:0005576,GO:0005794,GO:0005739,GO:0009506,GO:0004252,GO:0006508	extracellular region|Golgi apparatus|mitochondrion|plasmodesma|serine-type endopeptidase activity|proteolysis
J2O13_03G005684	455.819	95.2411	816.397	8.58612	3.10201	1.70E-18	6.45E-17	Up	11.117	10.5163	17.8656	1.34907	1.51653	0.866609	CYP92C6	Trimethyltridecatetraene synthase			GO:0016020,GO:0097007,GO:0020037,GO:0005506,GO:0010333,GO:0080027,GO:0016114	membrane|4,8,12-trimethyltrideca-1,3,7,11-tetraene synthase activity|heme binding|iron ion binding|terpene synthase activity|response to herbivore|terpenoid biosynthetic process
J2O13_03G005685	34.833	7.56528	62.1007	8.25294	3.04491	0.000343209	0.00142674	Up	1.14137	0.672479	0.804119	0.0714546	0.17138	0.0116517	RIPK	Serine/threonine-protein kinase RIPK			GO:0005886,GO:0005524,GO:0106310,GO:0004674,GO:0042742,GO:0006468	plasma membrane|ATP binding|protein serine kinase activity|protein serine/threonine kinase activity|defense response to bacterium|protein phosphorylation
J2O13_03G005688	938.541	573.359	1303.72	2.27513	1.18595	3.72E-13	7.35E-12	Up	8.44093	8.40618	10.303	3.26724	3.43896	3.07588
J2O13_03G005692	22.0413	5.09492	38.9877	7.58311	2.92279	0.0130416	0.0338299	Up	4.09593	0.964882	5.28632	0	0.357671	0.802462
J2O13_03G005694	4.28309	0	8.56617	46.1846	5.52934	0.00712428	0.0201372	Up	0.569443	0.127369	0.121842	0	0	0
J2O13_03G005698	550.847	783.588	318.107	0.406034	-1.30033	1.74E-10	2.33E-09	Down	4.70503	3.47124	3.68823	8.31466	8.18924	7.45444	MOB1-A	MOB kinase activator-like 1A	ko04390,ko04391,ko04392,ko04111	Hippo signaling pathway|Hippo signaling pathway - fly|Hippo signaling pathway - multiple species|Cell cycle - yeast	GO:0005737,GO:0005856,GO:0009524,GO:0046872	cytoplasm|cytoskeleton|phragmoplast|metal ion binding
J2O13_03G005700	3930.16	2609.77	5250.54	2.01197	1.00861	4.55E-13	8.87E-12	Up	52.0166	42.7871	44.915	17.787	20.2957	19.028	OPR3	12-oxophytodienoate reductase 3	ko00592	alpha-Linolenic acid metabolism	GO:0005777,GO:0016629,GO:0010181,GO:0042802,GO:0016491,GO:0006633,GO:0009695,GO:0031408	peroxisome|12-oxophytodienoate reductase activity|FMN binding|identical protein binding|oxidoreductase activity|fatty acid biosynthetic process|jasmonic acid biosynthetic process|oxylipin biosynthetic process
J2O13_03G005704	217.105	343.123	91.0876	0.265384	-1.91385	0.000112511	0.000526993	Down	0.545629	1.97965	0.965194	3.55014	4.01005	3.23971			ko03020,ko04623	RNA polymerase|Cytosolic DNA-sensing pathway
J2O13_03G005705	367.761	157.277	578.244	3.68022	1.87979	1.59E-08	1.59E-07	Up	9.53136	5.4546	10.8034	2.17382	1.9047	1.63508	CYP72A616	Cytochrome P450 CYP72A616			GO:0016020,GO:0020037,GO:0005506,GO:0004497,GO:0016705,GO:0008203,GO:0016135,GO:0006694	membrane|heme binding|iron ion binding|monooxygenase activity|oxidoreductase activity, acting on paired donors, with incorporation or reduction of molecular oxygen|cholesterol metabolic process|saponin biosynthetic process|steroid biosynthetic process
J2O13_03G005709	1075.96	591.448	1560.48	2.63823	1.39957	4.94E-14	1.09E-12	Up	98.85	138.737	105.823	34.4152	33.9726	39.0903	EFL4	Protein ELF4-LIKE 4			GO:0005634,GO:0042803,GO:0009649,GO:0009648,GO:0042753,GO:0048511	nucleus|protein homodimerization activity|entrainment of circadian clock|photoperiodism|positive regulation of circadian rhythm|rhythmic process
J2O13_03G005713	295.121	412.067	178.176	0.43252	-1.20916	0.00262475	0.0084716	Down	3.97039	3.65492	3.13131	7.93781	8.41787	3.75785	YUC11	Probable indole-3-pyruvate monooxygenase YUCCA11	ko00380	Tryptophan metabolism	GO:0050660,GO:0103075,GO:0004497,GO:0004499,GO:0050661,GO:0009851,GO:0009723	flavin adenine dinucleotide binding|indole-3-pyruvate monooxygenase activity|monooxygenase activity|N,N-dimethylaniline monooxygenase activity|NADP binding|auxin biosynthetic process|response to ethylene
J2O13_03G005715	13.2263	2.8117	23.641	8.23915	3.0425	0.0133686	0.0345675	Up	0.865297	0.423704	0.382799	0	0.0191965	0.156614	At1g54200	Protein BIG GRAIN 1-like B			GO:0005886,GO:0060918,GO:0009734,GO:0010929	plasma membrane|auxin transport|auxin-activated signaling pathway|positive regulation of auxin mediated signaling pathway
J2O13_03G005721	1315	146.271	2483.73	16.954	4.08356	2.34E-27	2.10E-25	Up	20.0239	12.2595	18.4307	0.512702	0.630044	1.37522	PAL	Phenylalanine ammonia-lyase	ko00360,ko00940	Phenylalanine metabolism|Phenylpropanoid biosynthesis	GO:0005737,GO:0045548,GO:0009800,GO:0006559	cytoplasm|phenylalanine ammonia-lyase activity|cinnamic acid biosynthetic process|L-phenylalanine catabolic process
J2O13_03G005723	27.8337	46.4626	9.2047	0.197848	-2.33753	3.25E-05	0.000171281	Down	0.493991	0.546938	0.332947	1.85969	2.43293	1.36462	NIFU3	NifU-like protein 3, chloroplastic			GO:0009507,GO:0009570,GO:0005739,GO:0051539,GO:0005506,GO:0060090,GO:0005198,GO:0016226,GO:0048564,GO:0097428	chloroplast|chloroplast stroma|mitochondrion|4 iron, 4 sulfur cluster binding|iron ion binding|molecular adaptor activity|structural molecule activity|iron-sulfur cluster assembly|photosystem I assembly|protein maturation by iron-sulfur cluster transfer
J2O13_03G005724	10.3069	0	20.6139	111.179	6.79674	1.06E-05	6.23E-05	Up	4.28412	1.75179	2.32029	0	0	0
J2O13_03G005737	700.364	220.225	1180.5	5.36208	2.42279	1.39E-19	5.85E-18	Up	24.9331	17.1799	18.4743	2.6829	3.86784	2.71003	At3g55350	Protein ALP1-like			GO:0000118,GO:0046872,GO:0004518	histone deacetylase complex|metal ion binding|nuclease activity
J2O13_03G005738	4754.56	7302.87	2206.25	0.302115	-1.72683	4.39E-08	4.08E-07	Down	41.0608	52.5073	45.0719	147.648	144.411	79.9174	GLYI4	Glyoxylase I 4			GO:0005737,GO:0005886,GO:0016829,GO:0140041,GO:0006952,GO:0009787,GO:2000022,GO:2000031,GO:0009409,GO:0009408,GO:0009753,GO:0051595,GO:0010045,GO:0006970,GO:0006979,GO:1902074,GO:0010224,GO:0009414,GO:0009611	cytoplasm|plasma membrane|lyase activity|cellular detoxification of methylglyoxal|defense response|regulation of abscisic acid-activated signaling pathway|regulation of jasmonic acid mediated signaling pathway|regulation of salicylic acid mediated signaling pathway|response to cold|response to heat|response to jasmonic acid|response to methylglyoxal|response to nickel cation|response to osmotic s…
J2O13_03G005743	4327.09	5882.65	2771.52	0.471154	-1.08573	1.20E-07	1.02E-06	Down	16.721	22.7553	20.7046	36.1953	37.7974	30.4971
J2O13_03G005747	19.1241	7.80758	30.4406	3.90707	1.96609	0.0102598	0.0276069	Up	1.47954	2.86385	0.87666	0.340815	0.513813	0.238177		Beta-galactosidase OS=Solanum lycopersicum OX=4081 PE=1 SV=1			GO:0005773,GO:0004565,GO:0030246,GO:0005975	vacuole|beta-galactosidase activity|carbohydrate binding|carbohydrate metabolic process
J2O13_03G005750	48.2075	6.0082	90.4069	14.8261	3.89007	1.19E-05	6.89E-05	Up	2.05041	1.54242	2.32752	0.036933	0.0177164	0.289077
J2O13_03G005754	2174.49	1010.07	3338.9	3.30632	1.72523	8.03E-09	8.47E-08	Up	142.644	106.772	140.199	33.6235	39.9984	22.0385	A70	Pathogen-associated molecular patterns-induced protein A70			GO:0016020,GO:0042742,GO:0009617,GO:0009753,GO:0009611	membrane|defense response to bacterium|response to bacterium|response to jasmonic acid|response to wounding
J2O13_03G005757	21.4777	6.82751	36.1279	5.32226	2.41204	0.000447677	0.00180334	Up	0.586234	0.509599	0.359199	0.0683971	0.120301	0.0334593	CKX3	Cytokinin dehydrogenase 3	ko00908	Zeatin biosynthesis	GO:0005783,GO:0005773,GO:0019139,GO:0071949,GO:0016491,GO:0008131,GO:0009823	endoplasmic reticulum|vacuole|cytokinin dehydrogenase activity|FAD binding|oxidoreductase activity|primary amine oxidase activity|cytokinin catabolic process
J2O13_03G005766	282.988	163.319	402.656	2.46808	1.30339	2.33E-05	0.000126613	Up	2.4798	3.28421	3.07885	1.01122	1.20227	0.704087	NPR1	BTB/POZ domain and ankyrin repeat-containing protein NPR1	ko04075	Plant hormone signal transduction	GO:0005737,GO:0005634,GO:2000022,GO:2000031,GO:0009862	cytoplasm|nucleus|regulation of jasmonic acid mediated signaling pathway|regulation of salicylic acid mediated signaling pathway|systemic acquired resistance, salicylic acid mediated signaling pathway
J2O13_03G005781	2257.45	3243.72	1271.18	0.391915	-1.35139	3.60E-12	6.19E-11	Down	12.9693	15.2188	13.1915	31.3387	30.1628	24.8368
J2O13_03G005782	465.652	291.982	639.321	2.18683	1.12884	2.78E-11	4.21E-10	Up	15.6256	14.7716	15.5939	4.77471	5.34098	7.33524	TET2	Tetraspanin-2			GO:0005886,GO:0009506,GO:0009734	plasma membrane|plasmodesma|auxin-activated signaling pathway
J2O13_03G005786	1173.88	2165.47	182.294	0.0841465	-3.57095	2.90E-22	1.59E-20	Down	3.53204	4.90291	2.2423	40.0331	37.722	25.7652	MYBS3	Transcription factor MYBS3			GO:0005634,GO:0003677,GO:0003700,GO:0046872,GO:0045892,GO:0009733,GO:0009723,GO:0009739,GO:0009744	nucleus|DNA binding|DNA-binding transcription factor activity|metal ion binding|negative regulation of DNA-templated transcription|response to auxin|response to ethylene|response to gibberellin|response to sucrose
J2O13_03G005792	789.407	1140.99	437.824	0.383857	-1.38136	5.41E-27	4.61E-25	Down	8.30209	8.77116	8.95744	19.4289	17.2865	19.0582	At4g29530	Thiamine phosphate phosphatase-like protein	ko00750	Vitamin B6 metabolism	GO:0004427,GO:0046872,GO:0016791,GO:0052732,GO:0042131,GO:0006580,GO:0051262,GO:0009229	inorganic diphosphate phosphatase activity|metal ion binding|phosphatase activity|phosphoethanolamine phosphatase activity|thiamine phosphate phosphatase activity|ethanolamine metabolic process|protein tetramerization|thiamine diphosphate biosynthetic process
J2O13_03G005800	556.731	783.696	329.767	0.420615	-1.24943	6.11E-08	5.53E-07	Down	4.29647	4.74168	4.76203	6.40646	9.01524	11.8999	PLA2-I	Probable phospholipase A2 homolog 1			GO:0005576,GO:0005509,GO:0047498,GO:0005543,GO:0050482,GO:0016042,GO:0006644,GO:0009555,GO:0009846,GO:0009860	extracellular region|calcium ion binding|calcium-dependent phospholipase A2 activity|phospholipid binding|arachidonic acid secretion|lipid catabolic process|phospholipid metabolic process|pollen development|pollen germination|pollen tube growth
J2O13_03G005819	950.165	524.806	1375.52	2.61993	1.38953	3.91E-10	5.03E-09	Up	28.7701	39.8267	36.2564	9.79883	9.00825	14.4753	At2g19810	Zinc finger CCCH domain-containing protein 20			GO:0005886,GO:0003677,GO:0003700,GO:0046872,GO:0051607,GO:0006355,GO:0006979	plasma membrane|DNA binding|DNA-binding transcription factor activity|metal ion binding|defense response to virus|regulation of DNA-templated transcription|response to oxidative stress
J2O13_03G005824	80.7458	145.66	15.8313	0.108635	-3.20244	0.000623087	0.00241494	Down	0.221703	0.527448	0.213467	3.62132	3.14335	0.286817	NUDT8	Nudix hydrolase 8			GO:0005829,GO:0047631,GO:0046872,GO:0051287,GO:0035529,GO:0009611	cytosol|ADP-ribose diphosphatase activity|metal ion binding|NAD binding|NADH pyrophosphatase activity|response to wounding
J2O13_03G005830	554.121	807.182	301.06	0.372967	-1.42288	4.84E-08	4.46E-07	Down	4.69392	3.01113	3.71205	8.78186	6.30859	10.2476
J2O13_03G005833	98.3299	51.8053	144.854	2.79057	1.48056	0.00055988	0.00219286	Up	4.88275	2.4706	4.24392	0.903277	0.844922	1.72331		Profilin-4 OS=Corylus avellana OX=13451 PE=1 SV=1	ko04013,ko04015,ko04810,ko05132,ko05131,ko05014	MAPK signaling pathway - fly|Rap1 signaling pathway|Regulation of actin cytoskeleton|Salmonella infection|Shigellosis|Amyotrophic lateral sclerosis	GO:0005737,GO:0005856,GO:0003779	cytoplasm|cytoskeleton|actin binding
J2O13_03G005835	754.103	303.974	1204.23	3.95949	1.98531	0.000516278	0.00204048	Up	14.1222	9.98473	11.7971	1.39774	1.00976	5.37123	At5g56590	Glucan endo-1,3-beta-glucosidase 13			GO:0005576,GO:0005886,GO:0009536,GO:0042973,GO:0005975,GO:0071555,GO:0006952	extracellular region|plasma membrane|plastid|glucan endo-1,3-beta-D-glucosidase activity|carbohydrate metabolic process|cell wall organization|defense response
J2O13_03G005838	612.709	389.41	836.007	2.14826	1.10317	1.56E-05	8.81E-05	Up	16.6351	14.41	15.5564	6.34498	6.87271	4.45176	MKK6	Mitogen-activated protein kinase kinase 6	ko04010,ko04013,ko04012,ko04014,ko04015,ko04370,ko04371,ko04668,ko04066,ko04068,ko04072,ko04071,ko04024,ko04022,ko04151,ko04150,ko04140,ko04114,ko04210,ko04218,ko04510,ko04540,ko04550,ko04810,ko04613,ko04620,ko04650,ko04660,ko04662,ko04664,ko04666,ko04062,ko04910,ko04929,ko04912,ko04915,ko04914,ko04917,ko04921,ko04926,ko04935,ko04919,ko04928,ko04916,ko04270,ko04725,ko04726,ko04720,ko04730,ko04722…	MAPK signaling pathway|MAPK signaling pathway - fly|ErbB signaling pathway|Ras signaling pathway|Rap1 signaling pathway|VEGF signaling pathway|Apelin signaling pathway|TNF signaling pathway|HIF-1 signaling pathway|FoxO signaling pathway|Phospholipase D signaling pathway|Sphingolipid signaling pathway|cAMP signaling pathway|cGMP-PKG signaling pathway|PI3K-Akt signaling pathway|mTOR signaling pathw…	GO:0005737,GO:0005856,GO:0009524,GO:0005524,GO:0004708,GO:0051019,GO:0031435,GO:0106310,GO:0004674,GO:0004713,GO:0002229,GO:0010311,GO:0007112	cytoplasm|cytoskeleton|phragmoplast|ATP binding|MAP kinase kinase activity|mitogen-activated protein kinase binding|mitogen-activated protein kinase kinase kinase binding|protein serine kinase activity|protein serine/threonine kinase activity|protein tyrosine kinase activity|defense response to oomycetes|lateral root formation|male meiosis cytokinesis
J2O13_03G005839	32.0306	54.8328	9.22828	0.168164	-2.57206	0.000160586	0.000722717	Down	0.229983	0.277781	0.132863	1.49547	1.05716	0.519799	MKK6	Mitogen-activated protein kinase kinase 6	ko04010,ko04013,ko04012,ko04014,ko04015,ko04370,ko04371,ko04668,ko04066,ko04068,ko04072,ko04071,ko04024,ko04022,ko04151,ko04150,ko04140,ko04114,ko04210,ko04218,ko04510,ko04540,ko04550,ko04810,ko04613,ko04620,ko04650,ko04660,ko04662,ko04664,ko04666,ko04062,ko04910,ko04929,ko04912,ko04915,ko04914,ko04917,ko04921,ko04926,ko04935,ko04919,ko04928,ko04916,ko04270,ko04725,ko04726,ko04720,ko04730,ko04722…	MAPK signaling pathway|MAPK signaling pathway - fly|ErbB signaling pathway|Ras signaling pathway|Rap1 signaling pathway|VEGF signaling pathway|Apelin signaling pathway|TNF signaling pathway|HIF-1 signaling pathway|FoxO signaling pathway|Phospholipase D signaling pathway|Sphingolipid signaling pathway|cAMP signaling pathway|cGMP-PKG signaling pathway|PI3K-Akt signaling pathway|mTOR signaling pathw…	GO:0005737,GO:0005856,GO:0009524,GO:0005524,GO:0004708,GO:0051019,GO:0031435,GO:0106310,GO:0004674,GO:0004713,GO:0002229,GO:0010311,GO:0007112	cytoplasm|cytoskeleton|phragmoplast|ATP binding|MAP kinase kinase activity|mitogen-activated protein kinase binding|mitogen-activated protein kinase kinase kinase binding|protein serine kinase activity|protein serine/threonine kinase activity|protein tyrosine kinase activity|defense response to oomycetes|lateral root formation|male meiosis cytokinesis
J2O13_03G005840	365.154	179.619	550.689	3.0678	1.61721	4.23E-06	2.70E-05	Up	12.132	17.6275	10.9512	3.68326	4.57769	2.55941	OXS3	Protein OXIDATIVE STRESS 3			GO:0016607,GO:0005634,GO:2000028,GO:2000070,GO:0046686,GO:0046688,GO:0010218,GO:0009416,GO:0006979,GO:0010114,GO:0009611,GO:0010043	nuclear speck|nucleus|regulation of photoperiodism, flowering|regulation of response to water deprivation|response to cadmium ion|response to copper ion|response to far red light|response to light stimulus|response to oxidative stress|response to red light|response to wounding|response to zinc ion
J2O13_03G005845	154.117	225.412	82.8232	0.367203	-1.44535	3.20E-06	2.10E-05	Down	0.698645	0.969573	0.98865	1.58496	1.65092	2.80012	PME53	Probable pectinesterase 53	ko00040,ko02020	Pentose and glucuronate interconversions|Two-component system	GO:0005737,GO:0005576,GO:0045330,GO:0030599,GO:0042545,GO:0045490	cytoplasm|extracellular region|aspartyl esterase activity|pectinesterase activity|cell wall modification|pectin catabolic process
J2O13_03G005849	1904.11	2605.09	1203.13	0.46179	-1.11469	2.33E-30	2.71E-28	Down	8.95959	9.0031	9.1789	15.4144	14.5988	18.56
J2O13_03G005850	1223.64	1724.68	722.603	0.419007	-1.25495	1.95E-11	3.02E-10	Down	12.0442	12.478	10.5467	25.042	23.0112	20.4866
J2O13_03G005856	952.211	470.482	1433.94	3.04877	1.60823	0.000204034	0.00089255	Up	13.8199	12.5753	13.3329	3.79533	5.0676	1.63844	RLK5	Receptor-like protein kinase 5			GO:0005886,GO:0005524,GO:0004672,GO:0106310,GO:0004674,GO:0004714,GO:0050829,GO:0010227,GO:0010102,GO:0060866,GO:0045490,GO:0046777,GO:0010468	plasma membrane|ATP binding|protein kinase activity|protein serine kinase activity|protein serine/threonine kinase activity|transmembrane receptor protein tyrosine kinase activity|defense response to Gram-negative bacterium|floral organ abscission|lateral root morphogenesis|leaf abscission|pectin catabolic process|protein autophosphorylation|regulation of gene expression
J2O13_03G005857	3130.05	4887.25	1372.84	0.280909	-1.83182	2.31E-07	1.88E-06	Down	9.00143	11.1858	8.9575	34.7081	32.8606	16.3505	HXK1	Hexokinase-1	ko00010,ko00051,ko00052,ko00500,ko00520,ko00521,ko00524,ko04066,ko04910,ko04973,ko05230,ko05131,ko04930	Glycolysis / Gluconeogenesis|Fructose and mannose metabolism|Galactose metabolism|Starch and sucrose metabolism|Amino sugar and nucleotide sugar metabolism|Streptomycin biosynthesis|Neomycin, kanamycin and gentamicin biosynthesis|HIF-1 signaling pathway|Insulin signaling pathway|Carbohydrate digestion and absorption|Central carbon metabolism in cancer|Shigellosis|Type II diabetes mellitus	GO:0005829,GO:0005741,GO:0005739,GO:0005634,GO:0000325,GO:0032991,GO:0005524,GO:0001046,GO:0008865,GO:0004340,GO:0005536,GO:0004396,GO:0008270,GO:0046835,GO:0001678,GO:0051156,GO:0010255,GO:0006006,GO:0006096,GO:0019320,GO:0012501,GO:2000032,GO:0006357,GO:0090332,GO:0010182,GO:0010148	cytosol|mitochondrial outer membrane|mitochondrion|nucleus|plant-type vacuole|protein-containing complex|ATP binding|core promoter sequence-specific DNA binding|fructokinase activity|glucokinase activity|glucose binding|hexokinase activity|zinc ion binding|carbohydrate phosphorylation|cellular glucose homeostasis|glucose 6-phosphate metabolic process|glucose mediated signaling pathway|glucose met…
J2O13_03G005858	114.3	192.498	36.1024	0.187511	-2.41495	4.30E-07	3.34E-06	Down	0.774253	1.31676	0.822608	4.61428	5.5007	2.48076
J2O13_03G005859	922.004	1829.27	14.7327	0.00804812	-6.95713	3.48E-44	1.11E-41	Down	0.174624	0.351529	0.252206	36.3658	27.9224	13.6238	DTX51	Protein DETOXIFICATION 51			GO:0010008,GO:0005770,GO:0031902,GO:0016020,GO:0015297,GO:0022857,GO:0042910,GO:0010252,GO:0006952,GO:0031348,GO:0046620,GO:0010015,GO:1990961	endosome membrane|late endosome|late endosome membrane|membrane|antiporter activity|transmembrane transporter activity|xenobiotic transmembrane transporter activity|auxin homeostasis|defense response|negative regulation of defense response|regulation of organ growth|root morphogenesis|xenobiotic detoxification by transmembrane export across the plasma membrane
J2O13_03G005861	302.973	422.573	183.372	0.434189	-1.2036	2.83E-08	2.74E-07	Down	2.44526	1.70918	2.13641	4.26178	3.74485	3.88536	IQD26	Protein IQ-domain 26			GO:0005737,GO:0005856,GO:0005886,GO:0005516	cytoplasm|cytoskeleton|plasma membrane|calmodulin binding
J2O13_03G005863	1960.64	1203.72	2717.56	2.25841	1.17531	3.65E-12	6.26E-11	Up	31.0792	32.3074	38.9665	13.5188	11.9195	11.6772	PP2C06	Probable protein phosphatase 2C 6	ko04016,ko04075,ko04931	MAPK signaling pathway - plant|Plant hormone signal transduction|Insulin resistance	GO:0005829,GO:0005634,GO:0046872,GO:0017018,GO:0004722,GO:0009738,GO:0035970	cytosol|nucleus|metal ion binding|myosin phosphatase activity|protein serine/threonine phosphatase activity|abscisic acid-activated signaling pathway|peptidyl-threonine dephosphorylation
J2O13_03G005864	42.4773	6.11188	78.8428	12.7448	3.67184	8.44E-06	5.06E-05	Up	4.61882	3.20263	4.44723	0	0.337006	0.472561	RDUF1	E3 ubiquitin-protein ligase RDUF1			GO:0005737,GO:0005829,GO:0005634,GO:0046872,GO:0061630,GO:0004842,GO:0009738,GO:0051865,GO:0016567,GO:0009737,GO:0009414	cytoplasm|cytosol|nucleus|metal ion binding|ubiquitin protein ligase activity|ubiquitin-protein transferase activity|abscisic acid-activated signaling pathway|protein autoubiquitination|protein ubiquitination|response to abscisic acid|response to water deprivation
J2O13_03G005867	269.064	135.309	402.818	2.97599	1.57337	3.09E-08	2.96E-07	Up	10.0981	11.8199	8.91882	2.12208	3.65628	2.75415	RDR3	Probable RNA-dependent RNA polymerase 3			GO:0031380,GO:0003723,GO:0003968,GO:0030422	nuclear RNA-directed RNA polymerase complex|RNA binding|RNA-dependent RNA polymerase activity|siRNA processing
J2O13_03G005869	13.1173	19.9673	6.26734	0.312319	-1.67891	0.016589	0.041526	Down	0.12023	0.181522	0.0771753	0.325748	0.230275	0.452898	AtMg00860	Uncharacterized mitochondrial protein AtMg00860			GO:0005739	mitochondrion
J2O13_03G005894	8963.65	12828.3	5099.02	0.397468	-1.33109	3.94E-11	5.83E-10	Down	84.279	77.837	69.4316	140.546	129.369	215.594	At1g67280	Probable lactoylglutathione lyase, chloroplastic	ko00620	Pyruvate metabolism	GO:0009507,GO:0009570,GO:0005737,GO:0005739,GO:0010319,GO:0009579,GO:0031977,GO:0004462,GO:0046872,GO:0019243,GO:0009409	chloroplast|chloroplast stroma|cytoplasm|mitochondrion|stromule|thylakoid|thylakoid lumen|lactoylglutathione lyase activity|metal ion binding|methylglyoxal catabolic process to D-lactate via S-lactoyl-glutathione|response to cold
J2O13_03G005901	28484.9	40363.7	16606	0.411408	-1.28136	3.39E-16	9.65E-15	Down	101.016	87.6012	76.5241	183.173	162.874	184.823	PETs	Polyprotein of EF-Ts, chloroplastic			GO:0009507,GO:0009941,GO:0043253,GO:0009570,GO:0005739,GO:0005886,GO:0003729,GO:1905538,GO:0003746,GO:0061770,GO:0006414	chloroplast|chloroplast envelope|chloroplast ribosome|chloroplast stroma|mitochondrion|plasma membrane|mRNA binding|polysome binding|translation elongation factor activity|translation elongation factor binding|translational elongation
J2O13_03G005911	208.189	112.887	303.49	2.68446	1.42463	0.007675	0.0214556	Up	4.3091	3.61888	4.46019	0.702805	0.663204	2.57009	ARAC7	Rac-like GTP-binding protein ARAC7	ko04010,ko04013,ko04014,ko04015,ko04310,ko04370,ko04071,ko04024,ko04151,ko04145,ko04510,ko04520,ko04530,ko04810,ko04613,ko04620,ko04650,ko04662,ko04664,ko04666,ko04670,ko04062,ko04972,ko04722,ko04360,ko04361,ko04380,ko05200,ko05205,ko05208,ko05203,ko05231,ko05210,ko05212,ko05211,ko05170,ko05163,ko05167,ko05169,ko05120,ko05130,ko05132,ko05131,ko05135,ko05100,ko05014,ko05020,ko05022,ko05417,ko05418…	MAPK signaling pathway|MAPK signaling pathway - fly|Ras signaling pathway|Rap1 signaling pathway|Wnt signaling pathway|VEGF signaling pathway|Sphingolipid signaling pathway|cAMP signaling pathway|PI3K-Akt signaling pathway|Phagosome|Focal adhesion|Adherens junction|Tight junction|Regulation of actin cytoskeleton|Neutrophil extracellular trap formation|Toll-like receptor signaling pathway|Natural …	GO:0005938,GO:0042995,GO:0031410,GO:0005856,GO:0005634,GO:0005886,GO:0005525,GO:0003924,GO:0019901,GO:0009738,GO:0007015,GO:0030865,GO:0007163,GO:0032956,GO:0008360,GO:0007264	cell cortex|cell projection|cytoplasmic vesicle|cytoskeleton|nucleus|plasma membrane|GTP binding|GTPase activity|protein kinase binding|abscisic acid-activated signaling pathway|actin filament organization|cortical cytoskeleton organization|establishment or maintenance of cell polarity|regulation of actin cytoskeleton organization|regulation of cell shape|small GTPase mediated signal transduction
J2O13_03G005917	5581.07	3593.84	7568.3	2.1061	1.07457	2.66E-08	2.58E-07	Up	72.9782	62.8032	65.6886	27.3282	28.8155	22.0139	AIM1	Peroxisomal fatty acid beta-oxidation multifunctional protein AIM1	ko00071,ko00592	Fatty acid degradation|alpha-Linolenic acid metabolism	GO:0005777,GO:0009505,GO:0005886,GO:0009506,GO:0003857,GO:0008692,GO:0004165,GO:0004300,GO:0070403,GO:0006635,GO:0009908,GO:0009695	peroxisome|plant-type cell wall|plasma membrane|plasmodesma|3-hydroxyacyl-CoA dehydrogenase activity|3-hydroxybutyryl-CoA epimerase activity|delta(3)-delta(2)-enoyl-CoA isomerase activity|enoyl-CoA hydratase activity|NAD+ binding|fatty acid beta-oxidation|flower development|jasmonic acid biosynthetic process
J2O13_03G005922	55.0062	28.0043	82.008	2.9231	1.5475	0.000603965	0.00234542	Up	1.08867	1.37319	0.955346	0.188651	0.452469	0.323002		Dynein 8 kDa light chain, flagellar outer arm OS=Chlamydomonas reinhardtii OX=3055 PE=1 SV=1			GO:0005930,GO:0097014,GO:0030286,GO:0005874,GO:0031514,GO:0007017,GO:0044458	axoneme|ciliary plasm|dynein complex|microtubule|motile cilium|microtubule-based process|motile cilium assembly
J2O13_03G005928	2360.29	3586.91	1133.67	0.316109	-1.6615	5.58E-17	1.76E-15	Down	11.3306	12.2835	14.3794	35.4861	34.4984	28.1491	ATC401	Pentatricopeptide repeat-containing protein At5g21222			GO:0009536,GO:0005524,GO:0003729,GO:0004672,GO:0006468	plastid|ATP binding|mRNA binding|protein kinase activity|protein phosphorylation
J2O13_03G005933	9070.45	12487	5653.94	0.452795	-1.14307	6.88E-05	0.000337576	Down	36.7314	49.3347	40.3237	92.0571	80.8848	53.8659	NYC1	Probable chlorophyll(ide) b reductase NYC1, chloroplastic	ko00860	Porphyrin metabolism	GO:0009507,GO:0009535,GO:0034256,GO:0015996,GO:0010304	chloroplast|chloroplast thylakoid membrane|chlorophyll(ide) b reductase activity|chlorophyll catabolic process|PSII associated light-harvesting complex II catabolic process
J2O13_03G005935	4.03989	8.07978	0	0.0223228	-5.48534	0.00205356	0.00686562	Down	0	0	0	0.174346	0.167264	0.170577	RPL37A	60S ribosomal protein L37-1	ko03010,ko05171	Ribosome|Coronavirus disease - COVID-19	GO:0022625,GO:0005576,GO:0046872,GO:0003729,GO:0003723,GO:0019843,GO:0003735,GO:0006412	cytosolic large ribosomal subunit|extracellular region|metal ion binding|mRNA binding|RNA binding|rRNA binding|structural constituent of ribosome|translation
J2O13_03G005936	289.386	432.018	146.754	0.339457	-1.5587	1.90E-09	2.19E-08	Down	1.11876	1.40974	1.26633	2.50628	2.54468	4.27509	PLT5	Polyol transporter 5			GO:0005886,GO:0005351,GO:0015591,GO:0015148,GO:0005354,GO:0005355,GO:0015168,GO:0015575,GO:0015145,GO:0005365,GO:0015576,GO:0010311	plasma membrane|carbohydrate:proton symporter activity|D-ribose transmembrane transporter activity|D-xylose transmembrane transporter activity|galactose transmembrane transporter activity|glucose transmembrane transporter activity|glycerol transmembrane transporter activity|mannitol transmembrane transporter activity|monosaccharide transmembrane transporter activity|myo-inositol transmembrane tra…
J2O13_03G005953	2220.14	3340.2	1100.09	0.329354	-1.60229	0.00120765	0.00432053	Down	39.043	80.1371	50.5657	167.549	186.675	60.9654
J2O13_03G005955	294.395	547.055	41.7346	0.0762602	-3.71293	9.61E-11	1.34E-09	Down	3.2484	6.13052	3.42094	55.3257	62.0776	17.59
J2O13_03G005958	11.3561	20.7318	1.98029	0.095098	-3.39444	0.000470282	0.00188208	Down	0.15311	0.10274	0.0491406	0.786	1.29868	0.512673
J2O13_03G005965	443.629	142.06	745.198	5.24129	2.38992	0.00552225	0.0161497	Up	22.1077	29.3752	19.0552	0.803763	0.925338	10.092
J2O13_03G005967	509.132	762.749	255.515	0.335077	-1.57744	1.55E-06	1.08E-05	Down	6.96737	6.59262	6.63315	18.3079	20.0704	10.4852
J2O13_03G005968	14.4604	2.79655	26.1242	9.51679	3.25047	0.000649733	0.00250459	Up	0.539008	0.185253	0.316453	0.0562405	0.0215824	0.011005
J2O13_03G005974	459.344	643.362	275.325	0.428154	-1.2238	1.45E-07	1.22E-06	Down	0.884074	0.614204	0.988803	1.45934	1.73236	1.5773	PDR1	Pleiotropic drug resistance protein 1			GO:0005886,GO:0140359,GO:0005524,GO:0009914,GO:2000032	plasma membrane|ABC-type transporter activity|ATP binding|hormone transport|regulation of secondary shoot formation
J2O13_03G005980	13.0394	2.8715	23.2073	7.93847	2.98886	0.00502174	0.0148765	Up	0.226536	0.627042	0.472593	0	0.0464875	0.0948166
J2O13_03G006000	118.687	217.26	20.1131	0.0923991	-3.43598	1.13E-07	9.73E-07	Down	0.229601	0.831963	0.331608	2.33771	3.03431	7.43811
J2O13_03G006014	4662.45	9252.39	72.5192	0.00783408	-6.99602	1.55E-33	2.27E-31	Down	5.26032	5.94036	2.84128	465.329	809.973	168.511
J2O13_03G006015	227.995	454.986	1.00423	0.00217597	-8.84412	7.32E-12	1.20E-10	Down	0.0933094	0.187837	0	18.6016	79.3496	4.92088
J2O13_03G006016	47.8395	93.0123	2.66662	0.0285049	-5.13265	2.97E-05	0.000157401	Down	0	0.765714	0.104641	5.30011	16.771	2.54728
J2O13_03G006017	3067.62	4679.5	1455.74	0.311098	-1.68456	3.17E-12	5.52E-11	Down	21.2633	26.0143	21.8634	66.5949	67.5481	47.0406	At3g10130	Heme-binding-like protein At3g10130, chloroplastic			GO:0009507,GO:0009535,GO:0010287,GO:0020037	chloroplast|chloroplast thylakoid membrane|plastoglobule|heme binding
J2O13_03G006020	2905.56	1888.81	3922.3	2.07703	1.05452	1.93E-29	2.03E-27	Up	109.608	104.799	106.785	43.2119	39.6368	44.4731	At1g52740	Probable histone H2A variant 3	ko04217,ko04613,ko05322,ko05034	Necroptosis|Neutrophil extracellular trap formation|Systemic lupus erythematosus|Alcoholism	GO:0000786,GO:0005634,GO:0000325,GO:0003677,GO:0046982,GO:0030527,GO:0044030,GO:0010468,GO:0009266	nucleosome|nucleus|plant-type vacuole|DNA binding|protein heterodimerization activity|structural constituent of chromatin|regulation of DNA methylation|regulation of gene expression|response to temperature stimulus
J2O13_03G006028	288.654	180.422	396.887	2.20296	1.13944	9.14E-09	9.53E-08	Up	28.0795	30.329	29.7188	12.6082	9.56856	10.6787
J2O13_03G006036	27.422	8.10775	46.7362	5.77433	2.52965	0.000493295	0.00196227	Up	1.18799	0.804036	0.907194	0.0700991	0.269007	0.0685838	At5g20050	Probable receptor-like protein kinase At5g20050			GO:0016020,GO:0005524,GO:0106310,GO:0004674,GO:0006468	membrane|ATP binding|protein serine kinase activity|protein serine/threonine kinase activity|protein phosphorylation
J2O13_03G006046	153.698	98.2392	209.157	2.12735	1.08906	0.00417786	0.0126694	Up	2.26926	3.739	3.84611	1.21015	0.829284	1.82153	PID2	Protein kinase PINOID 2			GO:0005737,GO:0005634,GO:0005886,GO:0005524,GO:0106310,GO:0004674,GO:0009734,GO:0048825,GO:0006468	cytoplasm|nucleus|plasma membrane|ATP binding|protein serine kinase activity|protein serine/threonine kinase activity|auxin-activated signaling pathway|cotyledon development|protein phosphorylation
J2O13_03G006059	17.7324	2.24633	33.2185	14.5625	3.86419	0.00146566	0.0051212	Up	2.13176	0.257482	0.465248	0.024319	0.0233312	0.118966	GLYI4	Glyoxylase I 4			GO:0005737,GO:0005886,GO:0016829,GO:0140041,GO:0006952,GO:0009787,GO:2000022,GO:2000031,GO:0009409,GO:0009408,GO:0009753,GO:0051595,GO:0010045,GO:0006970,GO:0006979,GO:1902074,GO:0010224,GO:0009414,GO:0009611	cytoplasm|plasma membrane|lyase activity|cellular detoxification of methylglyoxal|defense response|regulation of abscisic acid-activated signaling pathway|regulation of jasmonic acid mediated signaling pathway|regulation of salicylic acid mediated signaling pathway|response to cold|response to heat|response to jasmonic acid|response to methylglyoxal|response to nickel cation|response to osmotic s…
J2O13_03G006064	1146.96	1708.92	585	0.3424	-1.54624	9.93E-11	1.38E-09	Down	4.97143	5.70101	6.14786	14.8874	14.6175	10.5072	PL10A	DEAD-box ATP-dependent RNA helicase 37	ko04622,ko05203,ko05161	RIG-I-like receptor signaling pathway|Viral carcinogenesis|Hepatitis B	GO:0005634,GO:0005524,GO:0016887,GO:0003723,GO:0003724	nucleus|ATP binding|ATP hydrolysis activity|RNA binding|RNA helicase activity
J2O13_03G006073	4397.39	6195.39	2599.39	0.419611	-1.25288	1.70E-18	6.45E-17	Down	21.8515	18.8619	25.782	42.2844	41.7852	46.3334	NPF6.2	Protein NRT1/ PTR FAMILY 6.2			GO:0016020,GO:0015293,GO:0022857,GO:0042128,GO:0006857,GO:0009753,GO:0009611,GO:0055085	membrane|symporter activity|transmembrane transporter activity|nitrate assimilation|oligopeptide transport|response to jasmonic acid|response to wounding|transmembrane transport
J2O13_03G006081	3730.52	5027.55	2433.48	0.484052	-1.04677	3.24E-12	5.61E-11	Down	39.73	46.9012	42.437	74.7152	75.5196	68.4662
J2O13_03G006084	4681.24	7206.08	2156.39	0.299254	-1.74056	4.25E-07	3.30E-06	Down	23.2367	28.1267	24.1331	82.6224	81.3171	40.1326	HO1	Heme oxygenase 1, chloroplastic	ko00860	Porphyrin metabolism	GO:0009507,GO:0020037,GO:0004392,GO:0046872,GO:0016117,GO:0071494,GO:0010019,GO:0009813,GO:0006788,GO:0015979,GO:0010024,GO:0010075,GO:0010119	chloroplast|heme binding|heme oxygenase (decyclizing) activity|metal ion binding|carotenoid biosynthetic process|cellular response to UV-C|chloroplast-nucleus signaling pathway|flavonoid biosynthetic process|heme oxidation|photosynthesis|phytochromobilin biosynthetic process|regulation of meristem growth|regulation of stomatal movement
J2O13_03G006086	1150.68	1781.97	519.387	0.291467	-1.77859	2.04E-05	0.00011202	Down	7.1425	12.3822	6.84479	30.2103	28.8453	14.237	OPR3	12-oxophytodienoate reductase 3	ko00592	alpha-Linolenic acid metabolism	GO:0005777,GO:0016629,GO:0010181,GO:0042802,GO:0016491,GO:0006633,GO:0009695,GO:0031408	peroxisome|12-oxophytodienoate reductase activity|FMN binding|identical protein binding|oxidoreductase activity|fatty acid biosynthetic process|jasmonic acid biosynthetic process|oxylipin biosynthetic process
J2O13_03G006087	738.4	401.629	1075.17	2.676	1.42008	2.12E-18	7.97E-17	Up	21.5229	25.0098	24.7037	7.05529	6.12236	8.86192	PER25	Peroxidase 25	ko00940	Phenylpropanoid biosynthesis	GO:0005576,GO:0009505,GO:0020037,GO:0140825,GO:0046872,GO:0004601,GO:0042744,GO:0006979	extracellular region|plant-type cell wall|heme binding|lactoperoxidase activity|metal ion binding|peroxidase activity|hydrogen peroxide catabolic process|response to oxidative stress
J2O13_03G006088	6304.08	8985.73	3622.43	0.403148	-1.31062	4.24E-05	0.000217185	Down	79.4268	65.0008	87.259	197.754	166.679	100.297	SPX2	SPX domain-containing protein 2			GO:0005634,GO:0071456,GO:0016036	nucleus|cellular response to hypoxia|cellular response to phosphate starvation
J2O13_03G006089	26.084	11.3501	40.8179	3.59409	1.84563	0.000722057	0.00275064	Up	2.11549	2.55516	4.07379	0.482667	0.810358	0.70835	SPX2	SPX domain-containing protein 2			GO:0005634,GO:0071456,GO:0016036	nucleus|cellular response to hypoxia|cellular response to phosphate starvation
J2O13_03G006093	30.7926	52.0534	9.53179	0.182557	-2.45358	1.01E-05	5.99E-05	Down	0.145475	0.12202	0.0817076	0.342285	0.696567	0.537847	PLD1	Phospholipase D alpha 1	ko00564,ko00565,ko04014,ko04072,ko04071,ko04024,ko04144,ko04666,ko04912,ko04928,ko04724,ko05200,ko05208,ko05231,ko05212	Glycerophospholipid metabolism|Ether lipid metabolism|Ras signaling pathway|Phospholipase D signaling pathway|Sphingolipid signaling pathway|cAMP signaling pathway|Endocytosis|Fc gamma R-mediated phagocytosis|GnRH signaling pathway|Parathyroid hormone synthesis, secretion and action|Glutamatergic synapse|Pathways in cancer|Chemical carcinogenesis - reactive oxygen species|Choline metabolism in ca…	GO:0005783,GO:0005886,GO:0009536,GO:0005773,GO:0005509,GO:0070290,GO:0004630,GO:0016042,GO:0046470	endoplasmic reticulum|plasma membrane|plastid|vacuole|calcium ion binding|N-acylphosphatidylethanolamine-specific phospholipase D activity|phospholipase D activity|lipid catabolic process|phosphatidylcholine metabolic process
J2O13_03G006094	342.044	145.776	538.312	3.68747	1.88263	1.05E-12	1.93E-11	Up	13.1467	9.31994	13.184	1.99927	2.47377	3.56477
J2O13_03G006101	9847.57	15157.1	4538.07	0.299405	-1.73983	6.81E-05	0.000334378	Down	80.303	125.544	89.0272	327.727	340.831	125.236
J2O13_03G006107	25.0564	46.7546	3.35816	0.0712969	-3.81002	0.000732985	0.00278393	Down	0.0595976	0.539881	0	2.80453	1.95681	2.14523
J2O13_03G006108	4986.42	7014.7	2958.15	0.42167	-1.24581	1.30E-17	4.50E-16	Down	68.2988	68.6787	58.6697	119.827	111.084	153.699	At4g02530	Thylakoid lumenal 16.5 kDa protein, chloroplastic			GO:0009507,GO:0009941,GO:0009570,GO:0009534,GO:0009543,GO:0009535,GO:0005829,GO:0009579,GO:0031977,GO:0010206	chloroplast|chloroplast envelope|chloroplast stroma|chloroplast thylakoid|chloroplast thylakoid lumen|chloroplast thylakoid membrane|cytosol|thylakoid|thylakoid lumen|photosystem II repair
J2O13_03G006113	498.732	917.919	79.5445	0.0865076	-3.53103	1.98E-45	6.91E-43	Down	1.91042	2.35021	1.40797	15.841	16.3398	22.2113	At3g15810	Protein LURP-one-related 12			GO:0005829	cytosol
J2O13_03G006121	698.085	309.96	1086.21	3.50436	1.80915	4.92E-17	1.56E-15	Up	16.9039	24.3997	23.6067	5.16411	4.27434	5.86153	IAA29	Auxin-responsive protein IAA29	ko04075	Plant hormone signal transduction	GO:0005634,GO:0003700,GO:0009734,GO:0009733,GO:0010583,GO:0010218,GO:0009635,GO:0010114	nucleus|DNA-binding transcription factor activity|auxin-activated signaling pathway|response to auxin|response to cyclopentenone|response to far red light|response to herbicide|response to red light
J2O13_03G006125	7.25548	12.5922	1.91872	0.153994	-2.69905	0.0185379	0.0456163	Down	0.0210745	0.0212121	0.0811661	0.180312	0.363274	0.105848	MYB82	Transcription factor MYB82			GO:0005634,GO:0000976,GO:0030154,GO:0045893,GO:0010026	nucleus|transcription cis-regulatory region binding|cell differentiation|positive regulation of DNA-templated transcription|trichome differentiation
J2O13_03G006129	898.974	1337.79	460.163	0.34403	-1.53939	3.98E-07	3.11E-06	Down	3.32893	4.36267	4.08385	10.294	11.1035	6.40079	PBL34	Serine/threonine-protein kinase PBL34			GO:0005886,GO:0005524,GO:0106310,GO:0004674,GO:0006952,GO:0031663,GO:0002221,GO:0006468	plasma membrane|ATP binding|protein serine kinase activity|protein serine/threonine kinase activity|defense response|lipopolysaccharide-mediated signaling pathway|pattern recognition receptor signaling pathway|protein phosphorylation
J2O13_03G006132	1054.41	1637.37	471.455	0.287962	-1.79605	7.80E-08	6.94E-07	Down	10.6233	22.5863	21.7914	49.3321	60.2503	46.7836	CML2	Calmodulin-like protein 2			GO:0005737,GO:0005509,GO:0009567	cytoplasm|calcium ion binding|double fertilization forming a zygote and endosperm
J2O13_03G006134	802.225	520.393	1084.06	2.08418	1.05948	2.15E-23	1.28E-21	Up	7.05864	7.13131	7.49575	2.73436	2.91056	2.91846	HAT	Zinc finger BED domain-containing protein DAYSLEEPER			GO:0005829,GO:0005634,GO:0003677,GO:0046872,GO:0046983,GO:0009791	cytosol|nucleus|DNA binding|metal ion binding|protein dimerization activity|post-embryonic development
J2O13_03G006137	97.3472	60.8733	133.821	2.19383	1.13345	0.00161131	0.00556354	Up	1.02368	0.837631	1.12747	0.220538	0.435251	0.474696			ko04550	Signaling pathways regulating pluripotency of stem cells
J2O13_03G006158	14.8666	29.0843	0.648966	0.0223386	-5.48431	0.0189157	0.0464049	Down	0	0.0732122	0.070035	0	0.0597058	5.66262
J2O13_03G006162	462.005	658.482	265.529	0.403208	-1.3104	3.09E-05	0.000163418	Down	3.87784	2.85865	2.02991	6.87872	5.62197	5.31269	MGD2	Monogalactosyldiacylglycerol synthase 2, chloroplastic	ko00561	Glycerolipid metabolism	GO:0009707,GO:0046509,GO:0035250,GO:0016036,GO:0006631,GO:0019374,GO:0009247	chloroplast outer membrane|1,2-diacylglycerol 3-beta-galactosyltransferase activity|UDP-galactosyltransferase activity|cellular response to phosphate starvation|fatty acid metabolic process|galactolipid metabolic process|glycolipid biosynthetic process
J2O13_03G006171	3147.23	4850.51	1443.95	0.29771	-1.74802	8.69E-08	7.65E-07	Down	16.2997	14.9014	17.6278	51.4311	54.0949	27.1396	ANTR6	Probable anion transporter 6, chloroplastic			GO:0031969,GO:0009536,GO:0005315,GO:0006952	chloroplast membrane|plastid|inorganic phosphate transmembrane transporter activity|defense response
J2O13_03G006174	7798.31	11059.3	4537.35	0.410272	-1.28535	2.76E-10	3.61E-09	Down	146.196	142.636	171.573	220.615	339.68	369.83	FMO2	Putative flavin-containing monooxygenase 2	ko00430,ko00982	Taurine and hypotaurine metabolism|Drug metabolism - cytochrome P450	GO:0050660,GO:0004499,GO:0050661	flavin adenine dinucleotide binding|N,N-dimethylaniline monooxygenase activity|NADP binding
J2O13_03G006178	142.634	94.6874	190.58	2.01453	1.01044	0.00173493	0.00592489	Up	5.55506	5.27722	7.21172	2.05602	3.22774	2.0377
J2O13_03G006181	23.7649	47.5298	0	0.00379192	-8.04286	0.00254297	0.00824199	Down	0	0	0	0	0.449341	8.30562
J2O13_03G006184	2187	1357.05	3016.94	2.22258	1.15224	1.95E-10	2.60E-09	Up	82.263	83.4825	92.5349	27.3849	26.8291	42.4477
J2O13_03G006198	624.532	409.948	839.116	2.04762	1.03395	9.74E-14	2.06E-12	Up	17.9706	20.1419	17.6199	7.35924	7.51059	7.53077	At3g55350	Protein ALP1-like			GO:0000118,GO:0046872,GO:0004518	histone deacetylase complex|metal ion binding|nuclease activity
J2O13_03G006199	348.551	92.0636	605.038	6.58199	2.71852	5.76E-12	9.58E-11	Up	1.82994	1.3745	1.83603	0.21158	0.290946	0.117303	RLP8	Receptor-like protein 8			GO:0005886	plasma membrane
J2O13_03G006203	969.072	507.26	1430.88	2.81955	1.49546	5.03E-35	8.08E-33	Up	11.6268	11.3765	10.4148	3.05629	3.01448	3.72648	NFD4	Protein NUCLEAR FUSION DEFECTIVE 4			GO:0016020,GO:0005739,GO:0000741,GO:0010197,GO:0009651	membrane|mitochondrion|karyogamy|polar nucleus fusion|response to salt stress
J2O13_03G006205	110.927	68.5073	153.348	2.24114	1.16424	0.0121695	0.0318976	Up	9.7415	18.3423	10.8351	5.10146	6.06611	2.95253
J2O13_03G006208	5.46203	0.648077	10.276	15.526	3.95661	0.00756424	0.0212025	Up	0.130644	0.0821858	0.298753	0	0.0134048	0.0136703	RITF1	Protein RGF1 INDUCIBLE TRANSCRIPTION FACTOR 1			GO:0005634,GO:0046872,GO:0010078,GO:2000377,GO:2000280,GO:0043434	nucleus|metal ion binding|maintenance of root meristem identity|regulation of reactive oxygen species metabolic process|regulation of root development|response to peptide hormone
J2O13_03G006209	2445.15	3966.36	923.936	0.232957	-2.10187	1.76E-10	2.36E-09	Down	8.81641	9.29795	9.30003	37.2135	38.7253	19.2869	At2g41040	Uncharacterized methyltransferase At2g41040, chloroplastic			GO:0009507,GO:0010287,GO:0008168,GO:0032259,GO:0006744	chloroplast|plastoglobule|methyltransferase activity|methylation|ubiquinone biosynthetic process
J2O13_03G006213	4807.33	7639.79	1974.86	0.258498	-1.95178	7.80E-12	1.27E-10	Down	37.1634	40.8951	30.9169	133.915	127.787	81.1564	CRR6	Protein CHLORORESPIRATORY REDUCTION 6, chloroplastic			GO:0009507,GO:0009570,GO:0009535,GO:0005829,GO:0010275	chloroplast|chloroplast stroma|chloroplast thylakoid membrane|cytosol|NAD(P)H dehydrogenase complex assembly
J2O13_03G006215	970.344	551.667	1389.02	2.51784	1.33219	4.39E-12	7.46E-11	Up	19.9654	28.7058	21.9583	7.52023	7.33892	8.28617
J2O13_03G006222	33.3884	8.57214	58.2047	6.81441	2.76859	0.00688153	0.0195535	Up	4.61882	4.56126	6.20933	1.19301	0	0.65656
J2O13_03G006224	554.511	984.724	124.298	0.126295	-2.98513	1.19E-09	1.42E-08	Down	1.63855	0.812675	2.03498	13.166	10.2239	5.14859
J2O13_03G006230	2178.07	3294.97	1061.17	0.322081	-1.63451	9.34E-25	6.30E-23	Down	24.3845	26.7534	24.706	68.1641	66.0348	58.7075	CYP28	Peptidyl-prolyl cis-trans isomerase CYP28, chloroplastic			GO:0009507,GO:0009536,GO:0031977,GO:0003755,GO:0000413	chloroplast|plastid|thylakoid lumen|peptidyl-prolyl cis-trans isomerase activity|protein peptidyl-prolyl isomerization
J2O13_03G006242	2062.23	2803.87	1320.59	0.471041	-1.08607	0.00114829	0.00413808	Down	14.3942	13.1177	18.3324	28.8115	33.3611	16.5703	STA	Sugar carrier protein A			GO:0016020,GO:0015145,GO:0015293	membrane|monosaccharide transmembrane transporter activity|symporter activity
J2O13_03G006249	2206.29	208.197	4204.37	20.1736	4.33439	3.91E-19	1.59E-17	Up	62.0702	46.4119	55.8885	0.905169	1.70503	4.33081
J2O13_03G006253	737.143	1109.01	365.276	0.329308	-1.60249	3.28E-10	4.27E-09	Down	3.19851	4.82341	4.4835	8.46131	9.06391	14.1159	CHIT5A	Class V chitinase CHIT5a			GO:0005576,GO:0008061,GO:0004568,GO:0006032,GO:0050832,GO:0000272	extracellular region|chitin binding|chitinase activity|chitin catabolic process|defense response to fungus|polysaccharide catabolic process
J2O13_03G006254	1220.54	733.821	1707.26	2.32547	1.21753	2.54E-10	3.35E-09	Up	6.62691	7.58948	7.34846	1.88404	2.6873	3.12455	ChiC	Class V chitinase			GO:0005576,GO:0099503,GO:0008061,GO:0004568,GO:0008843,GO:0035885,GO:0006032,GO:0000272,GO:0009737,GO:0009753,GO:0009651	extracellular region|secretory vesicle|chitin binding|chitinase activity|endochitinase activity|exochitinase activity|chitin catabolic process|polysaccharide catabolic process|response to abscisic acid|response to jasmonic acid|response to salt stress
J2O13_03G006262	22.7699	41.2291	4.31063	0.103976	-3.26568	1.29E-05	7.43E-05	Down	0.0427009	0.114613	0.0274097	0.62109	0.443975	0.381279		RNA-directed DNA polymerase homolog OS=Oenothera berteroana OX=3950 PE=4 SV=1			GO:0005739,GO:0003968,GO:0003964	mitochondrion|RNA-dependent RNA polymerase activity|RNA-directed DNA polymerase activity
J2O13_03G006265	5905.78	7905.06	3906.51	0.494196	-1.01684	9.67E-05	0.00045873	Down	71.9439	80.9434	78.6744	141.379	148.118	91.3849	TIL	Temperature-induced lipocalin-1			GO:0009941,GO:0031969,GO:0005737,GO:0009898,GO:0005829,GO:0005783,GO:0005794,GO:0005739,GO:0000325,GO:0005886,GO:0009506,GO:0009536,GO:0045735,GO:0030644,GO:0071456,GO:0006883,GO:0010286,GO:0042538,GO:0006629,GO:1902884,GO:1901002,GO:0009409,GO:0050826,GO:0009408,GO:0009644,GO:0009416,GO:1901562,GO:0000302,GO:0009414,GO:0010431	chloroplast envelope|chloroplast membrane|cytoplasm|cytoplasmic side of plasma membrane|cytosol|endoplasmic reticulum|Golgi apparatus|mitochondrion|plant-type vacuole|plasma membrane|plasmodesma|plastid|nutrient reservoir activity|cellular chloride ion homeostasis|cellular response to hypoxia|cellular sodium ion homeostasis|heat acclimation|hyperosmotic salinity response|lipid metabolic process|p…
J2O13_03G006278	7548.62	10562.8	4534.4	0.429268	-1.22005	1.15E-09	1.37E-08	Down	23.2406	17.8191	21.1992	34.1747	33.378	53.1448	GAPN	NADP-dependent glyceraldehyde-3-phosphate dehydrogenase	ko00010,ko00030	Glycolysis / Gluconeogenesis|Pentose phosphate pathway	GO:0005737,GO:0008886	cytoplasm|glyceraldehyde-3-phosphate dehydrogenase (NADP+) (non-phosphorylating) activity
J2O13_03G006280	1201.86	731.2	1672.51	2.28644	1.1931	9.18E-11	1.28E-09	Up	19.2666	19.2123	21.9968	6.42024	5.99299	9.56699	RHL1	bHLH transcription factor RHL1			GO:0005634,GO:0003677,GO:0046983	nucleus|DNA binding|protein dimerization activity
J2O13_03G006288	1446.36	760.086	2132.63	2.80698	1.48902	9.88E-13	1.82E-11	Up	10.2865	9.54337	9.88666	3.07802	3.22111	2.34141	FH13	Formin-like protein 13			GO:0004721	phosphoprotein phosphatase activity
J2O13_03G006290	318.668	175.271	462.065	2.63957	1.40031	1.27E-11	2.02E-10	Up	11.0229	8.71291	9.31419	3.35684	2.77746	2.90198	At2g24240	BTB/POZ domain-containing protein At2g24240			GO:0051260,GO:0016567	protein homooligomerization|protein ubiquitination
J2O13_03G006292	4891.35	3244.63	6538.07	2.01475	1.0106	1.69E-15	4.51E-14	Up	55.8728	49.3043	52.9056	18.6164	20.2975	26.1116	UBP23	Ubiquitin carboxyl-terminal hydrolase 23			GO:0005829,GO:0005634,GO:0004843,GO:0004197,GO:0016579,GO:0006511	cytosol|nucleus|cysteine-type deubiquitinase activity|cysteine-type endopeptidase activity|protein deubiquitination|ubiquitin-dependent protein catabolic process
J2O13_03G006293	831.76	551.755	1111.77	2.01401	1.01007	0.00100112	0.00367461	Up	11.2941	12.3419	13.4158	3.80129	3.64689	7.99979	At2g24230	Probable LRR receptor-like serine/threonine-protein kinase At2g24230			GO:0016020,GO:0005524,GO:0106310,GO:0004674,GO:0006468	membrane|ATP binding|protein serine kinase activity|protein serine/threonine kinase activity|protein phosphorylation
J2O13_03G006306	8.51292	3.00701	14.0188	4.65471	2.21869	0.0102595	0.0276069	Up	1.2627	0.602026	0.959833	0.113722	0.218205	0.166895	APO2	APO protein 2, chloroplastic			GO:0009507,GO:0003723	chloroplast|RNA binding
J2O13_03G006313	78.1691	156.338	0	0.00115258	-9.76091	2.28E-14	5.27E-13	Down	0	0	0	7.59968	6.29942	14.3355	At1g65750	Putative ribonuclease H protein At1g65750	ko04361	Axon regeneration	GO:0046872,GO:0003676,GO:0004523	metal ion binding|nucleic acid binding|RNA-DNA hybrid ribonuclease activity
J2O13_03G006328	42.4886	81.6374	3.33979	0.0404373	-4.62817	6.46E-09	6.93E-08	Down	0.457309	0.460295	0	4.46049	4.95499	9.57032
J2O13_03G006331	34.8912	13.7032	56.0793	4.06193	2.02216	0.000345379	0.00143409	Up	5.98736	3.52978	5.02372	0.585457	0.702096	1.7184
J2O13_03G006356	883.486	481.481	1285.49	2.66869	1.41613	3.91E-26	3.08E-24	Up	14.7267	15.824	13.4179	4.19681	4.27683	5.1468
J2O13_03G006357	4.23759	0	8.47517	45.7223	5.51483	0.00176812	0.00602324	Up	0.994822	1.28741	1.36838	0	0	0
J2O13_03G006360	9285.55	14022.3	4548.8	0.324378	-1.62425	3.57E-45	1.22E-42	Down	70.3122	69.198	61.6235	160.402	155.83	196.753	RPL35	50S ribosomal protein L35, chloroplastic	ko03010	Ribosome	GO:0009507,GO:0015934,GO:0003729,GO:0003735,GO:0006412	chloroplast|large ribosomal subunit|mRNA binding|structural constituent of ribosome|translation
J2O13_03G006371	13.6841	3.64111	23.727	6.49072	2.69838	0.00402252	0.012261	Up	0.774722	0.222794	0.596752	0.075754	0.0181693	0.111175
J2O13_03G006373	20.7337	1.93724	39.5301	19.8659	4.31222	8.82E-08	7.76E-07	Up	0.67733	0.493183	0.555036	0.0123302	0.0118294	0.0482547	SAMDC	S-adenosylmethionine decarboxylase proenzyme	ko00270,ko00330	Cysteine and methionine metabolism|Arginine and proline metabolism	GO:0005829,GO:0004014,GO:0008295,GO:0006597	cytosol|adenosylmethionine decarboxylase activity|spermidine biosynthetic process|spermine biosynthetic process
J2O13_03G006379	242.024	49.1093	434.938	8.83061	3.14251	2.30E-24	1.49E-22	Up	3.93213	3.32971	2.6278	0.205847	0.3456	0.37762	At3g47570	Probable LRR receptor-like serine/threonine-protein kinase At3g47570			GO:0005886,GO:0005524,GO:0106310,GO:0004674,GO:0006468	plasma membrane|ATP binding|protein serine kinase activity|protein serine/threonine kinase activity|protein phosphorylation
J2O13_03G006383	1789.45	995.118	2583.79	2.59609	1.37634	9.07E-27	7.42E-25	Up	19.1811	21.8317	18.993	5.63891	6.62536	6.80796	At5g35200	Putative clathrin assembly protein At5g35200			GO:0005905,GO:0030136,GO:0005794,GO:0005545,GO:0032050,GO:0005546,GO:0000149,GO:0048268,GO:0072583,GO:0006900	clathrin-coated pit|clathrin-coated vesicle|Golgi apparatus|1-phosphatidylinositol binding|clathrin heavy chain binding|phosphatidylinositol-4,5-bisphosphate binding|SNARE binding|clathrin coat assembly|clathrin-dependent endocytosis|vesicle budding from membrane
J2O13_03G006386	32.8562	8.89444	56.818	6.34267	2.66509	4.64E-06	2.93E-05	Up	0.732353	1.34025	0.785276	0.0996859	0.0819744	0.195062	CCR1	Cinnamoyl-CoA reductase 1			GO:0005737,GO:0016621,GO:0000166,GO:0007623,GO:0010597,GO:0009809,GO:0009699	cytoplasm|cinnamoyl-CoA reductase activity|nucleotide binding|circadian rhythm|green leaf volatile biosynthetic process|lignin biosynthetic process|phenylpropanoid biosynthetic process
J2O13_03G006387	3.78984	0	7.57968	40.855	5.35244	0.00421613	0.0127616	Up	0.0385504	0.0485026	0.0231989	0	0	0	KS	Ent-kaur-16-ene synthase, chloroplastic	ko00904	Diterpenoid biosynthesis	GO:0009507,GO:0009899,GO:0000287,GO:0009686	chloroplast|ent-kaurene synthase activity|magnesium ion binding|gibberellin biosynthetic process
J2O13_03G006392	6565.66	1902.7	11228.6	5.90043	2.56082	4.58E-24	2.86E-22	Up	1001.33	861.61	968.373	103.887	101.375	196.455
J2O13_03G006393	3736.93	996.103	6477.75	6.50134	2.70074	1.58E-17	5.36E-16	Up	391.984	375.203	442.054	38.2011	34.9307	83.3082
J2O13_03G006404	692.486	376.242	1008.73	2.67866	1.42151	4.21E-11	6.21E-10	Up	13.8035	12.2951	14.3611	3.19317	3.71527	5.67221	At4g30420	WAT1-related protein At4g30420			GO:0005886,GO:0022857	plasma membrane|transmembrane transporter activity
J2O13_03G006405	85.6669	29.8849	141.449	4.71438	2.23707	7.55E-06	4.58E-05	Up	1.58393	2.37369	1.05061	0.180694	0.260031	0.45179	At4g30420	WAT1-related protein At4g30420			GO:0005886,GO:0022857	plasma membrane|transmembrane transporter activity
J2O13_03G006411	814.88	541.392	1088.37	2.01108	1.00797	0.000292029	0.00123239	Up	34.2915	20.1253	31.0724	12.8305	12.0117	9.84308	IBL1	Transcription factor IBH1-like 1			GO:0005634,GO:0003700,GO:0046983,GO:0000976,GO:0009742,GO:0009740,GO:0040008	nucleus|DNA-binding transcription factor activity|protein dimerization activity|transcription cis-regulatory region binding|brassinosteroid mediated signaling pathway|gibberellic acid mediated signaling pathway|regulation of growth
J2O13_03G006425	1327.34	2016.24	638.445	0.316622	-1.65917	3.81E-47	1.47E-44	Down	17.8057	18.0859	16.5693	44.1011	46.231	45.9879
J2O13_03G006437	470.958	721.947	219.969	0.304672	-1.71467	1.48E-05	8.41E-05	Down	3.43157	7.78932	4.51179	15.1459	16.4539	10.5195	GDU3	Protein GLUTAMINE DUMPER 3			GO:0016020,GO:0006865,GO:0019048,GO:0080143,GO:0009615,GO:0032940	membrane|amino acid transport|modulation by virus of host process|regulation of amino acid export|response to virus|secretion by cell
J2O13_03G006442	1448.3	919.479	1977.12	2.1502	1.10447	0.000491162	0.0019551	Up	26.475	16.9834	18.8206	5.63404	10.8275	7.34095	Os07g0190000	Probable 1-deoxy-D-xylulose-5-phosphate synthase 2, chloroplastic	ko00730,ko00900	Thiamine metabolism|Terpenoid backbone biosynthesis	GO:0009507,GO:0008661,GO:0046872,GO:0016744,GO:0052865,GO:0016114,GO:0009228	chloroplast|1-deoxy-D-xylulose-5-phosphate synthase activity|metal ion binding|transketolase or transaldolase activity|1-deoxy-D-xylulose 5-phosphate biosynthetic process|terpenoid biosynthetic process|thiamine biosynthetic process
J2O13_03G006446	1450.3	2262.31	638.302	0.282113	-1.82565	4.65E-20	2.05E-18	Down	17.6355	23.4562	16.807	60.0474	52.8076	55.9123	At4g14100	Uncharacterized protein At4g14100			GO:0000325,GO:0099503	plant-type vacuole|secretory vesicle
J2O13_03G006449	2493.38	3549.8	1436.96	0.404817	-1.30466	0.00896694	0.0245963	Down	13.334	14.5789	13.7986	37.0469	35.6287	9.86998	CIPK21	CBL-interacting serine/threonine-protein kinase 21			GO:0005829,GO:0009705,GO:0005524,GO:0106310,GO:0004674,GO:0071470,GO:0071472,GO:0035556,GO:0006468	cytosol|plant-type vacuole membrane|ATP binding|protein serine kinase activity|protein serine/threonine kinase activity|cellular response to osmotic stress|cellular response to salt stress|intracellular signal transduction|protein phosphorylation
J2O13_03G006455	4820.46	6518.75	3122.17	0.478974	-1.06198	2.00E-05	0.000110173	Down	17.6553	16.0879	16.6047	32.7217	31.6722	21.0903	DTX16	Protein DETOXIFICATION 16			GO:0016020,GO:0000325,GO:0009536,GO:0015297,GO:0022857,GO:0042910,GO:0009624,GO:1990961	membrane|plant-type vacuole|plastid|antiporter activity|transmembrane transporter activity|xenobiotic transmembrane transporter activity|response to nematode|xenobiotic detoxification by transmembrane export across the plasma membrane
J2O13_03G006459	103.898	155.261	52.5359	0.337774	-1.56587	0.000372206	0.00153297	Down	1.09473	1.55079	0.56607	2.34161	2.27978	3.29225
J2O13_03G006464	8205.6	12981.8	3429.41	0.264174	-1.92044	2.60E-09	2.95E-08	Down	14.3272	21.0943	16.5481	64.8689	59.4717	35.2378	EDR1	Serine/threonine-protein kinase EDR1			GO:0005737,GO:0005829,GO:0005769,GO:0005783,GO:0005768,GO:0005634,GO:0005886,GO:0005802,GO:0012510,GO:0005524,GO:0016301,GO:0004709,GO:0004672,GO:0106310,GO:0004712,GO:0009738,GO:0008219,GO:0002229,GO:0009873,GO:0000165,GO:0009788,GO:0046777,GO:1900424,GO:1900150,GO:2000031,GO:0009617,GO:0009723,GO:0009620,GO:0009414,GO:0007165	cytoplasm|cytosol|early endosome|endoplasmic reticulum|endosome|nucleus|plasma membrane|trans-Golgi network|trans-Golgi network transport vesicle membrane|ATP binding|kinase activity|MAP kinase kinase kinase activity|protein kinase activity|protein serine kinase activity|protein serine/threonine/tyrosine kinase activity|abscisic acid-activated signaling pathway|cell death|defense response to oomy…
J2O13_03G006470	105.152	163.473	46.8313	0.286599	-1.80289	0.00722406	0.0203837	Down	0.52252	1.32457	0.894414	3.67587	3.11354	0.874802	XTH25	Probable xyloglucan endotransglucosylase/hydrolase protein 25	ko04075	Plant hormone signal transduction	GO:0048046,GO:0004553,GO:0030247,GO:0016762,GO:0071555,GO:0009832,GO:0010411	apoplast|hydrolase activity, hydrolyzing O-glycosyl compounds|polysaccharide binding|xyloglucan:xyloglucosyl transferase activity|cell wall organization|plant-type cell wall biogenesis|xyloglucan metabolic process
J2O13_03G006473	170.528	247.752	93.3043	0.376364	-1.4098	0.00139217	0.00489803	Down	2.52914	1.15547	1.38166	2.9773	2.65024	5.66072	XTH23	Probable xyloglucan endotransglucosylase/hydrolase protein 23			GO:0048046,GO:0005794,GO:0004553,GO:0030247,GO:0016762,GO:0042546,GO:0071555,GO:0010411	apoplast|Golgi apparatus|hydrolase activity, hydrolyzing O-glycosyl compounds|polysaccharide binding|xyloglucan:xyloglucosyl transferase activity|cell wall biogenesis|cell wall organization|xyloglucan metabolic process
J2O13_03G006520	715.257	324.453	1106.06	3.41075	1.77009	1.23E-10	1.69E-09	Up	7.02686	6.10828	7.86933	1.56466	2.1694	1.28443	DUF7	DUF724 domain-containing protein 7			GO:0005634,GO:0042803,GO:0009908	nucleus|protein homodimerization activity|flower development
J2O13_03G006604	283.055	497.776	68.3338	0.137189	-2.86576	1.12E-17	3.89E-16	Down	1.31404	1.01054	0.725014	6.69517	6.62925	4.82014	At5g57480	AAA-ATPase At5g57480			GO:0005524,GO:0016887,GO:0006950	ATP binding|ATP hydrolysis activity|response to stress
J2O13_03G006618	2299.1	1307.62	3290.58	2.51709	1.33175	1.65E-14	3.85E-13	Up	9.02799	8.03187	9.40548	2.84496	3.20862	2.55021	DUF6	DUF724 domain-containing protein 6			GO:0005634	nucleus
J2O13_03G006621	112.161	186.41	37.911	0.203472	-2.2971	2.59E-06	1.73E-05	Down	0.351786	0.170484	0.225811	1.11476	1.26734	0.594413		RNA-directed DNA polymerase homolog OS=Oenothera berteroana OX=3950 PE=4 SV=1			GO:0005739,GO:0003968,GO:0003964	mitochondrion|RNA-dependent RNA polymerase activity|RNA-directed DNA polymerase activity
J2O13_03G006624	634.741	1015.8	253.681	0.249841	-2.00092	1.34E-10	1.83E-09	Down	0.73976	1.22999	1.63643	4.12209	3.83936	3.86445	REM19	B3 domain-containing protein REM19			GO:0005634,GO:0005886,GO:0003677,GO:0009409	nucleus|plasma membrane|DNA binding|response to cold
J2O13_03G006640	92.7096	17.109	168.31	9.79729	3.29238	7.44E-09	7.88E-08	Up	1.31782	0.429136	1.08226	0.0473746	0.0772656	0.115876	IDM1	Increased DNA methylation 1			GO:0005634,GO:0009506,GO:0010385,GO:0004402,GO:0042393,GO:0046872,GO:0080188,GO:0044154,GO:0043971,GO:0043972,GO:0044030	nucleus|plasmodesma|double-stranded methylated DNA binding|histone acetyltransferase activity|histone binding|metal ion binding|gene silencing by RNA-directed DNA methylation|histone H3-K14 acetylation|histone H3-K18 acetylation|histone H3-K23 acetylation|regulation of DNA methylation
J2O13_03G006648	101.757	137.541	65.9728	0.47868	-1.06287	0.000539168	0.00212013	Down	0.582204	0.636235	0.440451	0.811241	0.812425	1.26018	SULTR12	Sulfate transporter 1.2			GO:0005886,GO:0008271,GO:0015293,GO:0009970	plasma membrane|secondary active sulfate transmembrane transporter activity|symporter activity|cellular response to sulfate starvation
J2O13_03G006663	4.22434	8.44867	0	0.0213543	-5.54933	0.00180904	0.00614851	Down	0	0	0	0.743875	0.892075	0.63682
J2O13_03G006664	53.3227	103.751	2.89478	0.0280879	-5.15391	9.17E-08	8.04E-07	Down	0.109972	0.0368966	0.176477	3.79502	4.66392	0.736459
J2O13_03G006666	6607.96	8888.6	4327.32	0.486825	-1.03852	8.32E-21	4.00E-19	Down	61.4917	55.4209	53.6299	95.0222	87.4549	106.687	DJA6	Chaperone protein dnaJ A6, chloroplastic			GO:0009507,GO:0009941,GO:0009535,GO:0005737,GO:0005773,GO:0005524,GO:0031072,GO:0005506,GO:0051082,GO:0051085,GO:0042026,GO:0009408	chloroplast|chloroplast envelope|chloroplast thylakoid membrane|cytoplasm|vacuole|ATP binding|heat shock protein binding|iron ion binding|unfolded protein binding|chaperone cofactor-dependent protein refolding|protein refolding|response to heat
J2O13_03G006675	42.9368	60.7556	25.118	0.414408	-1.27088	0.00114758	0.00413634	Down	0.951679	0.919578	1.02628	2.14962	2.03106	1.52957
J2O13_03G006683	72.9341	42.7264	103.142	2.40963	1.26881	0.00130088	0.00460964	Up	1.66965	1.2357	2.2223	0.392149	0.618076	0.753642
J2O13_03G006692	41.4914	74.4697	8.51316	0.114227	-3.13003	3.46E-12	5.97E-11	Down	0.0817222	0.0822558	0.0699433	0.62929	0.469567	0.585282	STR	ABC transporter G family member STR	ko02010,ko04976,ko01523	ABC transporters|Bile secretion|Antifolate resistance	GO:0005886,GO:0140359,GO:0005524,GO:0016887,GO:0009610	plasma membrane|ABC-type transporter activity|ATP binding|ATP hydrolysis activity|response to symbiotic fungus
J2O13_03G006693	166.432	250.42	82.4444	0.329058	-1.60359	0.000448869	0.00180653	Down	1.8335	3.99348	1.64962	6.09491	7.57441	4.93156	STR	ABC transporter G family member STR	ko02010,ko04976,ko01523	ABC transporters|Bile secretion|Antifolate resistance	GO:0005886,GO:0140359,GO:0005524,GO:0016887,GO:0009610	plasma membrane|ABC-type transporter activity|ATP binding|ATP hydrolysis activity|response to symbiotic fungus
J2O13_03G006703	881.034	358.311	1403.76	3.91547	1.96919	8.61E-13	1.61E-11	Up	6.09043	8.66863	9.5809	1.38958	1.39417	2.39835		RNA-directed DNA polymerase homolog OS=Oenothera berteroana OX=3950 PE=4 SV=1			GO:0005739,GO:0003968,GO:0003964	mitochondrion|RNA-dependent RNA polymerase activity|RNA-directed DNA polymerase activity
J2O13_03G006707	2764.32	1403.56	4125.07	2.93849	1.55508	1.97E-08	1.94E-07	Up	30.8474	19.107	23.2591	5.25352	5.86251	9.69627	At4g20930	Probable 3-hydroxyisobutyrate dehydrogenase, mitochondrial			GO:0005739,GO:0008442,GO:0051287,GO:0050661,GO:0016616,GO:0043621,GO:0006551,GO:0006574,GO:0006573	mitochondrion|3-hydroxyisobutyrate dehydrogenase activity|NAD binding|NADP binding|oxidoreductase activity, acting on the CH-OH group of donors, NAD or NADP as acceptor|protein self-association|leucine metabolic process|valine catabolic process|valine metabolic process
J2O13_03G006732	92.7184	144.343	41.0942	0.284598	-1.813	0.000142073	0.000647762	Down	1.71067	4.47679	2.30597	9.4844	8.31281	6.58722
J2O13_03G006733	2450.78	3972.42	929.135	0.233901	-2.09603	5.58E-06	3.47E-05	Down	5.93403	11.1486	7.92363	34.7863	37.8426	13.5393	9DC3	Receptor-like protein 9DC3			GO:0005886,GO:0050832	plasma membrane|defense response to fungus
J2O13_03G006740	11061.4	15917.2	6205.59	0.38987	-1.35893	1.86E-09	2.15E-08	Down	25.204	28.846	23.1747	57.972	60.4653	43.2638	SIS8	Probable serine/threonine-protein kinase SIS8			GO:0005739,GO:0005634,GO:0005524,GO:0106310,GO:0004674,GO:0004712,GO:0006468,GO:0009651,GO:0010182	mitochondrion|nucleus|ATP binding|protein serine kinase activity|protein serine/threonine kinase activity|protein serine/threonine/tyrosine kinase activity|protein phosphorylation|response to salt stress|sugar mediated signaling pathway
J2O13_03G006749	10560.5	6898.59	14222.3	2.06152	1.04371	5.41E-06	3.38E-05	Up	207.14	176.359	196.451	58.2584	66.3324	110.539	BGLU44	Beta-glucosidase 44	ko00500,ko00460,ko00946,ko00999	Starch and sucrose metabolism|Cyanoamino acid metabolism|Degradation of flavonoids|Biosynthesis of various plant secondary metabolites	GO:0022626,GO:0005576,GO:0009505,GO:0080081,GO:0047668,GO:0080083,GO:0008422,GO:0004567,GO:0080079,GO:0080082,GO:0046872,GO:0102483,GO:0005975	cytosolic ribosome|extracellular region|plant-type cell wall|4-methylumbelliferyl-beta-D-glucopyranoside beta-glucosidase activity|amygdalin beta-glucosidase activity|beta-gentiobiose beta-glucosidase activity|beta-glucosidase activity|beta-mannosidase activity|cellobiose glucosidase activity|esculin beta-glucosidase activity|metal ion binding|scopolin beta-glucosidase activity|carbohydrate metab…
J2O13_03G006752	660.578	188.259	1132.9	6.01419	2.58837	0.00277852	0.00890015	Up	16.9842	19.4928	26.0355	0.809037	0.492573	7.79371	CYP96A15	Alkane hydroxylase MAH1			GO:0005783,GO:0005789,GO:0020037,GO:0005506,GO:0080133,GO:0010025	endoplasmic reticulum|endoplasmic reticulum membrane|heme binding|iron ion binding|midchain alkane hydroxylase activity|wax biosynthetic process
J2O13_03G006764	104.073	160.802	47.344	0.294556	-1.76339	0.0163412	0.0410384	Down	0.586817	1.14319	0.984222	2.78572	3.99331	0.5863	At4g15970	Uncharacterized protein At4g15970
J2O13_03G006767	15.1918	2.52552	27.8582	10.8268	3.43654	0.00449343	0.0134841	Up	0.760995	0.255321	0.77343	0.0180862	0	0.123867	PUB21	U-box domain-containing protein 21			GO:0061630	ubiquitin protein ligase activity
J2O13_03G006768	880.369	1549.09	211.65	0.1366	-2.87197	9.42E-23	5.35E-21	Down	4.66931	3.31856	3.43194	21.866	15.6968	32.1645	PAP17	Purple acid phosphatase 17	ko00740,ko04142,ko04380,ko05323	Riboflavin metabolism|Lysosome|Osteoclast differentiation|Rheumatoid arthritis	GO:0009986,GO:0005576,GO:0003993,GO:0008199,GO:0008198,GO:0140825,GO:0016791,GO:0030643,GO:0042542	cell surface|extracellular region|acid phosphatase activity|ferric iron binding|ferrous iron binding|lactoperoxidase activity|phosphatase activity|cellular phosphate ion homeostasis|response to hydrogen peroxide
J2O13_03G006777	230.76	417.498	44.0218	0.105462	-3.24521	1.95E-22	1.09E-20	Down	0.738082	0.476579	0.643619	3.36005	6.09278	5.08268		Glutamate decarboxylase OS=Solanum lycopersicum OX=4081 PE=2 SV=1	ko00650,ko00250,ko00410,ko00430,ko02024,ko04727,ko04940	Butanoate metabolism|Alanine, aspartate and glutamate metabolism|beta-Alanine metabolism|Taurine and hypotaurine metabolism|Quorum sensing|GABAergic synapse|Type I diabetes mellitus	GO:0005829,GO:0005516,GO:0004351,GO:0030170,GO:0006538	cytosol|calmodulin binding|glutamate decarboxylase activity|pyridoxal phosphate binding|glutamate catabolic process
J2O13_03G006800	9.01841	1.78657	16.2502	9.36063	3.22661	0.00687826	0.0195473	Up	0.405159	0.203903	0.390107	0.0693304	0.0166286	0
J2O13_03G006809	2720.22	1097.23	4343.21	3.95748	1.98458	4.04E-09	4.46E-08	Up	131.121	82.9222	117.097	16.3094	17.1538	36.8607	LTPG31	Non-specific lipid transfer protein GPI-anchored 31			GO:0005886,GO:0009536,GO:0008289,GO:0006869,GO:0010089	plasma membrane|plastid|lipid binding|lipid transport|xylem development
J2O13_03G006832	2757.47	4142.15	1372.78	0.331403	-1.59334	1.46E-37	2.81E-35	Down	4.28121	4.21123	3.75878	10.164	10.1287	10.1047	PAA1	Copper-transporting ATPase PAA1, chloroplastic	ko04016,ko04978,ko01524	MAPK signaling pathway - plant|Mineral absorption|Platinum drug resistance	GO:0009507,GO:0009941,GO:0031969,GO:0009570,GO:0016020,GO:0005886,GO:0009536,GO:0005524,GO:0016887,GO:0016531,GO:0005507,GO:0005375,GO:0043682,GO:0140581,GO:0055070,GO:0035434,GO:0009767	chloroplast|chloroplast envelope|chloroplast membrane|chloroplast stroma|membrane|plasma membrane|plastid|ATP binding|ATP hydrolysis activity|copper chaperone activity|copper ion binding|copper ion transmembrane transporter activity|P-type divalent copper transporter activity|P-type monovalent copper transporter activity|copper ion homeostasis|copper ion transmembrane transport|photosynthetic ele…
J2O13_03G006846	967.076	1298.02	636.131	0.490057	-1.02898	1.36E-16	4.09E-15	Down	13.4953	12.2957	13.9874	21.0451	19.9362	26.135	ISPD	2-C-methyl-D-erythritol 4-phosphate cytidylyltransferase, chloroplastic	ko00900	Terpenoid backbone biosynthesis	GO:0009507,GO:0009570,GO:0050518,GO:0019288	chloroplast|chloroplast stroma|2-C-methyl-D-erythritol 4-phosphate cytidylyltransferase activity|isopentenyl diphosphate biosynthetic process, methylerythritol 4-phosphate pathway
J2O13_03G006853	18.3454	36.0655	0.625383	0.0179181	-5.80244	5.69E-06	3.54E-05	Down	0	0	0.0986446	0.92039	1.34553	2.4442
J2O13_03G006868	15215.5	24023.9	6407.1	0.266699	-1.90671	3.91E-06	2.51E-05	Down	37.9038	44.0714	43.6042	155.935	163.383	59.6238	FRO7	Ferric reduction oxidase 7, chloroplastic			GO:0009507,GO:0031969,GO:0005886,GO:0009536,GO:0140618,GO:0000293,GO:0046872,GO:0006811,GO:0009767	chloroplast|chloroplast membrane|plasma membrane|plastid|ferric-chelate reductase (NADH) activity|ferric-chelate reductase activity|metal ion binding|ion transport|photosynthetic electron transport chain
J2O13_03G006874	625.611	979.999	271.223	0.276785	-1.85316	1.04E-24	6.89E-23	Down	4.16282	4.16039	3.75323	13.0008	11.7483	11.0082	PCMP-H12	Pentatricopeptide repeat-containing protein At1g08070, chloroplastic			GO:0009507,GO:0003723,GO:0008270,GO:0031425,GO:0006397,GO:0009451	chloroplast|RNA binding|zinc ion binding|chloroplast RNA processing|mRNA processing|RNA modification
J2O13_03G006883	51.5527	22.3499	80.7556	3.62182	1.85672	0.000172175	0.000770203	Up	1.88174	3.61587	2.86599	0.848913	0.393174	0.658722	rbcL	Ribulose bisphosphate carboxylase large chain	ko00630,ko00710	Glyoxylate and dicarboxylate metabolism|Carbon fixation in photosynthetic organisms	GO:0009507,GO:0000287,GO:0004497,GO:0016984,GO:0009853,GO:0019253	chloroplast|magnesium ion binding|monooxygenase activity|ribulose-bisphosphate carboxylase activity|photorespiration|reductive pentose-phosphate cycle
J2O13_03G006890	47.1057	94.2113	0	0.00191505	-9.0284	9.73E-13	1.80E-11	Down	0	0	0	3.18312	3.2408	2.41518
J2O13_03G006895	4.26347	0	8.52693	45.9784	5.52289	0.00227844	0.00751174	Up	0.112198	0.225861	0.14404	0	0	0	cemA	Chloroplast envelope membrane protein	ko00195	Photosynthesis	GO:0009706,GO:0015078	chloroplast inner membrane|proton transmembrane transporter activity
J2O13_03G006898	184.443	82.179	286.707	3.48697	1.80197	5.89E-06	3.64E-05	Up	3.89962	4.06987	5.93989	1.1623	0.590343	1.56529	rpoA	DNA-directed RNA polymerase subunit alpha	ko03020	RNA polymerase	GO:0009507,GO:0005737,GO:0000428,GO:0003677,GO:0003899,GO:0046983,GO:0006351	chloroplast|cytoplasm|DNA-directed RNA polymerase complex|DNA binding|DNA-directed 5'-3' RNA polymerase activity|protein dimerization activity|DNA-templated transcription
J2O13_03G006915	18.6289	7.21349	30.0443	4.12612	2.04479	0.000854237	0.00319005	Up	2.07432	2.8395	2.63638	0.354955	0.340537	0.833477	At4g29890	Choline monooxygenase, chloroplastic	ko00260	Glycine, serine and threonine metabolism	GO:0009570,GO:0051537,GO:0019133,GO:0005506,GO:0019285	chloroplast stroma|2 iron, 2 sulfur cluster binding|choline monooxygenase activity|iron ion binding|glycine betaine biosynthetic process from choline
J2O13_03G006918	1217.5	325.107	2109.89	6.48628	2.69739	2.63E-06	1.76E-05	Up	36.1227	42.9107	41.1934	2.43066	2.23927	11.2764	BHLH35	Transcription factor bHLH35			GO:0005634,GO:0003700,GO:0046983,GO:0043565,GO:0006355	nucleus|DNA-binding transcription factor activity|protein dimerization activity|sequence-specific DNA binding|regulation of DNA-templated transcription
J2O13_03G006929	9.31503	1.28916	17.3409	13.2076	3.7233	0.00514717	0.0152	Up	0.621703	0.113775	0.253954	0.016119	0	0.0473116	PIRL6	Plant intracellular Ras-group-related LRR protein 6
J2O13_03G006946	374.033	231.367	516.7	2.23166	1.15812	1.91E-05	0.000105616	Up	7.19725	5.80946	8.90791	2.22403	2.22546	3.72018	ORP4B	Oxysterol-binding protein-related protein 4B			GO:0005829,GO:0043231,GO:0016020,GO:0032934,GO:0015248	cytosol|intracellular membrane-bounded organelle|membrane|sterol binding|sterol transporter activity
J2O13_03G006971	2324.48	3760.88	888.089	0.236137	-2.0823	1.33E-40	3.20E-38	Down	22.7159	26.6976	23.1984	87.8648	85.0497	79.3405			ko00350,ko00360	Tyrosine metabolism|Phenylalanine metabolism
J2O13_03G006983	362.316	180.593	544.039	3.00886	1.58922	3.21E-05	0.000169152	Up	5.58437	4.45461	5.6238	0.950716	0.990056	2.44864	APSR1	Protein ALTERED PHOSPHATE STARVATION RESPONSE 1			GO:0005634	nucleus
J2O13_03G006990	256.892	360.572	153.213	0.425159	-1.23392	2.77E-06	1.84E-05	Down	1.11287	0.791402	0.902645	2.00783	1.86173	1.52395	HMA2	Cadmium/zinc-transporting ATPase HMA2			GO:0005886,GO:0005524,GO:0016887,GO:0015086,GO:0046872,GO:0008551,GO:0016463,GO:0005385,GO:0055069	plasma membrane|ATP binding|ATP hydrolysis activity|cadmium ion transmembrane transporter activity|metal ion binding|P-type cadmium transporter activity|P-type zinc transporter activity|zinc ion transmembrane transporter activity|zinc ion homeostasis
J2O13_03G006992	115.041	160.508	69.5731	0.433369	-1.20633	5.42E-08	4.95E-07	Down	1.19819	1.47834	1.39557	2.36449	2.60157	2.78252	GPP1	(DL)-glycerol-3-phosphatase 1, mitochondrial	ko00561	Glycerolipid metabolism	GO:0005739,GO:0043726,GO:0000121,GO:0043136,GO:0046872,GO:0016791,GO:0016311,GO:0006114,GO:0009231	mitochondrion|5-amino-6-(5-phosphoribitylamino)uracil phosphatase activity|glycerol-1-phosphatase activity|glycerol-3-phosphatase activity|metal ion binding|phosphatase activity|dephosphorylation|glycerol biosynthetic process|riboflavin biosynthetic process
J2O13_03G007001	1263.41	1761.12	765.693	0.434757	-1.20172	6.39E-10	7.92E-09	Down	9.72302	7.22448	9.67092	14.5091	14.9927	21.298			ko04520	Adherens junction
J2O13_03G007008	90.8545	4.50664	177.202	38.5226	5.26763	8.20E-15	2.01E-13	Up	2.24843	1.24898	2.20574	0	0.052234	0.0710247	AIL5	AP2-like ethylene-responsive transcription factor AIL5			GO:0005634,GO:0003700,GO:0000976,GO:0060774,GO:1990110,GO:0009873,GO:0010311,GO:0060772,GO:0060771,GO:0040019,GO:0009791,GO:0048364,GO:0009845	nucleus|DNA-binding transcription factor activity|transcription cis-regulatory region binding|auxin mediated signaling pathway involved in phyllotactic patterning|callus formation|ethylene-activated signaling pathway|lateral root formation|leaf phyllotactic patterning|phyllotactic patterning|positive regulation of embryonic development|post-embryonic development|root development|seed germination
J2O13_03G007018	410.408	139.172	681.645	4.89279	2.29066	0.000819408	0.00307202	Up	7.0647	13.5429	12.5532	0.61819	0.896209	4.34131	SCPL18	Serine carboxypeptidase-like 18			GO:0005576,GO:0016747,GO:0004185,GO:0006508,GO:0019748	extracellular region|acyltransferase activity, transferring groups other than amino-acyl groups|serine-type carboxypeptidase activity|proteolysis|secondary metabolic process
J2O13_03G007021	458.829	206.866	710.792	3.433	1.77947	5.67E-05	0.000283001	Up	5.03093	8.75871	6.66626	1.14731	0.983609	2.91374	SCPL18	Serine carboxypeptidase-like 18			GO:0005576,GO:0016747,GO:0004185,GO:0006508,GO:0019748	extracellular region|acyltransferase activity, transferring groups other than amino-acyl groups|serine-type carboxypeptidase activity|proteolysis|secondary metabolic process
J2O13_03G007028	2737.52	3837.29	1637.74	0.426805	-1.22835	9.18E-06	5.48E-05	Down	16.2509	18.856	13.4929	36.2634	33.3888	23.0999	At2g18940	Pentatricopeptide repeat-containing protein At2g18940, chloroplastic			GO:0009507,GO:0003729	chloroplast|mRNA binding
J2O13_03G007040	1870.92	2989.82	752.022	0.251476	-1.99151	1.87E-38	3.78E-36	Down	19.5441	18.5174	15.1897	55.9932	59.2521	59.113	NIFU3	NifU-like protein 3, chloroplastic			GO:0009507,GO:0009570,GO:0005739,GO:0051539,GO:0005506,GO:0060090,GO:0005198,GO:0016226,GO:0048564,GO:0097428	chloroplast|chloroplast stroma|mitochondrion|4 iron, 4 sulfur cluster binding|iron ion binding|molecular adaptor activity|structural molecule activity|iron-sulfur cluster assembly|photosystem I assembly|protein maturation by iron-sulfur cluster transfer
J2O13_03G007046	43.3536	6.79995	79.9073	11.67	3.54473	0.0199181	0.0483841	Up	1.22741	1.08658	1.26725	0	0	0.27234
J2O13_03G007058	170.574	275.687	65.4613	0.237252	-2.07551	2.52E-05	0.000136213	Down	2.90156	6.61585	2.1666	13.5781	15.6513	11.1531	ZFP2	Zinc finger protein 2			GO:0005634,GO:0003700,GO:0046872,GO:0009788,GO:0060862,GO:0006355	nucleus|DNA-binding transcription factor activity|metal ion binding|negative regulation of abscisic acid-activated signaling pathway|negative regulation of floral organ abscission|regulation of DNA-templated transcription
J2O13_04G007068	212.48	372.156	52.8047	0.141845	-2.81762	3.21E-05	0.000169317	Down	0.757087	1.4709	0.576388	7.21574	7.05272	1.59176	PPCC	Phosphoenolpyruvate carboxylase 2	ko00620,ko00710,ko00720,ko00680	Pyruvate metabolism|Carbon fixation in photosynthetic organisms|Carbon fixation pathways in prokaryotes|Methane metabolism	GO:0005737,GO:0008964,GO:0015977,GO:0006099	cytoplasm|phosphoenolpyruvate carboxylase activity|carbon fixation|tricarboxylic acid cycle
J2O13_04G007071	10702.3	17790	3614.71	0.20319	-2.2991	3.26E-12	5.64E-11	Down	38.2942	45.8289	41.2048	198.173	200.041	100.99	HCF173	Protein HIGH CHLOROPHYLL FLUORESCENCE PHENOTYPE 173, chloroplastic			GO:0009507,GO:0009941,GO:0031969,GO:0009570,GO:0009535,GO:0009523,GO:0042651,GO:0003729,GO:0003723,GO:0010207,GO:0006413	chloroplast|chloroplast envelope|chloroplast membrane|chloroplast stroma|chloroplast thylakoid membrane|photosystem II|thylakoid membrane|mRNA binding|RNA binding|photosystem II assembly|translational initiation
J2O13_04G007115	442.752	160.499	725.005	4.51972	2.17623	0.000477079	0.00190507	Up	13.9646	8.8004	11.1701	2.16756	3.30948	0.530177	CYP726A27	Cytochrome P450 726A27			GO:0016020,GO:0020037,GO:0005506,GO:0004497,GO:0016705,GO:0016114	membrane|heme binding|iron ion binding|monooxygenase activity|oxidoreductase activity, acting on paired donors, with incorporation or reduction of molecular oxygen|terpenoid biosynthetic process
J2O13_04G007116	173.367	65.4332	281.3	4.3004	2.10447	0.00298923	0.00947121	Up	2.98491	1.76644	1.36429	0.203079	0.797033	0.150522	RCOM_1574350	Casbene synthase, chloroplastic	ko00904	Diterpenoid biosynthesis	GO:0009507,GO:0050449,GO:0000287,GO:0006952,GO:0016102,GO:0120251	chloroplast|casbene synthase activity|magnesium ion binding|defense response|diterpenoid biosynthetic process|hydrocarbon biosynthetic process
J2O13_04G007123	77759.3	124029	31489.9	0.253891	-1.97772	1.65E-51	7.96E-49	Down	219.819	214.652	182.513	675.681	640.826	684.219		Phosphoglycerate kinase, chloroplastic OS=Nicotiana tabacum OX=4097 PE=2 SV=1	ko00010,ko00710,ko04066	Glycolysis / Gluconeogenesis|Carbon fixation in photosynthetic organisms|HIF-1 signaling pathway	GO:0009507,GO:0005829,GO:0043531,GO:0005524,GO:0004618,GO:0006094,GO:0006096,GO:0019253	chloroplast|cytosol|ADP binding|ATP binding|phosphoglycerate kinase activity|gluconeogenesis|glycolytic process|reductive pentose-phosphate cycle
J2O13_04G007124	2797.77	3829.83	1765.72	0.461074	-1.11693	6.75E-11	9.66E-10	Down	16.8253	18.7749	17.2181	32.4346	33.6312	27.7058	PGK1	Phosphoglycerate kinase 1, chloroplastic			GO:0048046,GO:0009507,GO:0009941,GO:0009570,GO:0005737,GO:0005829,GO:0005739,GO:0005634,GO:0009505,GO:0010319,GO:0009579,GO:0043531,GO:0005524,GO:0003729,GO:0004618,GO:0004672,GO:0019375,GO:0006094,GO:0006096,GO:0019253,GO:0009409,GO:0010027	apoplast|chloroplast|chloroplast envelope|chloroplast stroma|cytoplasm|cytosol|mitochondrion|nucleus|plant-type cell wall|stromule|thylakoid|ADP binding|ATP binding|mRNA binding|phosphoglycerate kinase activity|protein kinase activity|galactolipid biosynthetic process|gluconeogenesis|glycolytic process|reductive pentose-phosphate cycle|response to cold|thylakoid membrane organization
J2O13_04G007136	76.4129	3.39998	149.426	43.0458	5.4278	4.17E-06	2.66E-05	Up	2.67536	1.41441	2.02955	0	0	0.124419	TPS6	Probable terpene synthase 6			GO:0000287,GO:0010333,GO:0016102,GO:0120251	magnesium ion binding|terpene synthase activity|diterpenoid biosynthetic process|hydrocarbon biosynthetic process
J2O13_04G007161	90.9362	50.558	131.314	2.60407	1.38077	0.000647503	0.00249761	Up	3.94608	4.82079	3.1904	1.54637	1.35993	0.832119	LBD4	LOB domain-containing protein 4			GO:0000976,GO:0010087	transcription cis-regulatory region binding|phloem or xylem histogenesis
J2O13_04G007162	101.936	19.9533	183.919	9.22594	3.2057	3.12E-06	2.05E-05	Up	5.3921	2.12765	2.44928	0.168598	0.558772	0.149958	S8H	Scopoletin 8-hydroxylase	ko00999	Biosynthesis of various plant secondary metabolites	GO:0016706,GO:0051213,GO:0046872,GO:0106145,GO:0009805,GO:0106147,GO:0010039	2-oxoglutarate-dependent dioxygenase activity|dioxygenase activity|metal ion binding|scopoletin 8-hydroxylase activity|coumarin biosynthetic process|fraxetin biosynthesis|response to iron ion
J2O13_04G007163	208.73	76.6865	340.774	4.44907	2.1535	0.0002367	0.00101869	Up	5.13961	7.184	5.27748	1.15414	1.68192	0.343046	S8H	Scopoletin 8-hydroxylase	ko00999	Biosynthesis of various plant secondary metabolites	GO:0016706,GO:0051213,GO:0046872,GO:0106145,GO:0009805,GO:0106147,GO:0010039	2-oxoglutarate-dependent dioxygenase activity|dioxygenase activity|metal ion binding|scopoletin 8-hydroxylase activity|coumarin biosynthetic process|fraxetin biosynthesis|response to iron ion
J2O13_04G007167	39.84	11.9613	67.7187	5.63884	2.4954	7.76E-09	8.19E-08	Up	1.36082	0.999515	1.4165	0.141605	0.181138	0.230907
J2O13_04G007178	407.53	208.553	606.506	2.9104	1.54122	3.51E-08	3.33E-07	Up	5.20742	8.33193	7.11484	2.04969	2.13262	1.61937	NAL1	Protein NARROW LEAF 1			GO:0005737,GO:0005654,GO:0080006,GO:0010305,GO:2000024,GO:0010222	cytoplasm|nucleoplasm|internode patterning|leaf vascular tissue pattern formation|regulation of leaf development|stem vascular tissue pattern formation
J2O13_04G007190	2195.54	3013.2	1377.87	0.457289	-1.12882	1.08E-06	7.78E-06	Down	16.5585	17.7823	13.7864	30.3699	32.2831	23.3338	At1g79080	Pentatricopeptide repeat-containing protein At1g79080, chloroplastic			GO:0009507,GO:0003729	chloroplast|mRNA binding
J2O13_04G007199	732.98	476.588	989.371	2.07693	1.05445	1.47E-05	8.38E-05	Up	5.52012	5.6466	5.66109	2.20534	2.69195	1.71109	LECRK3	G-type lectin S-receptor-like serine/threonine-protein kinase LECRK3			GO:0016020,GO:0005524,GO:0030246,GO:0106310,GO:0004674,GO:0006952,GO:0006468	membrane|ATP binding|carbohydrate binding|protein serine kinase activity|protein serine/threonine kinase activity|defense response|protein phosphorylation
J2O13_04G007203	51657.5	32809.5	70505.5	2.14895	1.10363	0.00130184	0.00461209	Up	269.991	436.352	274.446	139.156	149.285	82.539	LOX2.1	Linoleate 13S-lipoxygenase 2-1, chloroplastic	ko00591,ko00592	Linoleic acid metabolism|alpha-Linolenic acid metabolism	GO:0009570,GO:0009534,GO:0016165,GO:0046872,GO:0016702,GO:0006633,GO:0010597,GO:0034440,GO:0031408	chloroplast stroma|chloroplast thylakoid|linoleate 13S-lipoxygenase activity|metal ion binding|oxidoreductase activity, acting on single donors with incorporation of molecular oxygen, incorporation of two atoms of oxygen|fatty acid biosynthetic process|green leaf volatile biosynthetic process|lipid oxidation|oxylipin biosynthetic process
J2O13_04G007209	4804.45	8096.01	1512.89	0.186873	-2.41987	1.73E-62	1.62E-59	Down	15.1459	16.3058	15.4306	72.6391	69.1929	63.7872	JMJ30	Lysine-specific demethylase JMJ30			GO:0005737,GO:0005783,GO:0000791,GO:0005634,GO:0016706,GO:0003700,GO:0061628,GO:0071558,GO:0046975,GO:0140680,GO:0140681,GO:0140684,GO:0046872,GO:0043565,GO:0009738,GO:0009742,GO:1990110,GO:0007623,GO:0040029,GO:0009908,GO:0070544,GO:0045814,GO:0080022,GO:0009787,GO:1900457,GO:0042752,GO:0010468,GO:2000028,GO:1900140,GO:0009737,GO:0009741,GO:0009266,GO:0010378	cytoplasm|endoplasmic reticulum|euchromatin|nucleus|2-oxoglutarate-dependent dioxygenase activity|DNA-binding transcription factor activity|H3K27me3 modified histone binding|histone H3K27me2/H3K27me3 demethylase activity|histone H3K36 methyltransferase activity|histone H3K36me/H3K36me2 demethylase activity|histone H3K36me2/H3K36me3 demethylase activity|histone H3K9me2/H3K9me3 demethylase activity…
J2O13_04G007210	599.582	270.843	928.321	3.42549	1.77631	2.81E-12	4.92E-11	Up	22.2977	13.6357	16.7605	3.38271	4.16814	5.2075	UGT92A1	UDP-glycosyltransferase 92A1			GO:0008194	UDP-glycosyltransferase activity
J2O13_04G007232	152.237	251.382	53.0926	0.211012	-2.2446	2.71E-21	1.37E-19	Down	2.24396	2.07039	1.69247	8.15966	7.21425	8.04589	PCMP-E28	Pentatricopeptide repeat-containing protein At2g22410, mitochondrial			GO:0009507,GO:0005739,GO:0003723,GO:1900865	chloroplast|mitochondrion|RNA binding|chloroplast RNA modification
J2O13_04G007234	1276.83	370.295	2183.36	5.89273	2.55894	5.20E-10	6.53E-09	Up	37.0248	25.8064	29.2163	2.01264	4.03315	7.14247
J2O13_04G007247	6.01405	0	12.0281	64.9029	6.02021	0.00027143	0.00115283	Up	0.0881524	0.144183	0.169755	0	0	0
J2O13_04G007251	934.71	1280.19	589.232	0.46031	-1.11932	3.29E-06	2.15E-05	Down	11.1796	13.63	10.2716	24.1489	20.6799	17.4483
J2O13_04G007255	3752.45	5491.47	2013.43	0.366654	-1.44751	7.38E-06	4.48E-05	Down	18.9892	34.9104	26.3915	65.8113	68.5898	43.8818	RBCX2	Chaperonin-like RbcX protein 2, chloroplastic			GO:0009570,GO:0044183,GO:0015977,GO:0061077,GO:0015979,GO:0110102	chloroplast stroma|protein folding chaperone|carbon fixation|chaperone-mediated protein folding|photosynthesis|ribulose bisphosphate carboxylase complex assembly
J2O13_04G007259	4799.2	8371.98	1226.42	0.146481	-2.77122	5.77E-17	1.81E-15	Down	13.8665	13.2314	10.0352	52.8615	48.0599	112.699	DIT1	Dicarboxylate transporter 1, chloroplastic			GO:0009507,GO:0009941,GO:0009706,GO:0009534,GO:0009536,GO:0015139,GO:0015140,GO:0015131,GO:0015742,GO:0019676,GO:0071423,GO:0015729,GO:0009624	chloroplast|chloroplast envelope|chloroplast inner membrane|chloroplast thylakoid|plastid|alpha-ketoglutarate transmembrane transporter activity|malate transmembrane transporter activity|oxaloacetate transmembrane transporter activity|alpha-ketoglutarate transport|ammonia assimilation cycle|malate transmembrane transport|oxaloacetate transport|response to nematode
J2O13_04G007265	360.853	225.778	495.927	2.19674	1.13536	4.98E-06	3.13E-05	Up	6.65546	9.40777	11.2932	3.08056	3.49279	3.68374	DALL2	Phospholipase A1-Igamma3, chloroplastic			GO:0009507,GO:0047714,GO:0008970,GO:0004620,GO:0004806,GO:0016042	chloroplast|galactolipase activity|phospholipase A1 activity|phospholipase activity|triglyceride lipase activity|lipid catabolic process
J2O13_04G007281	932.358	517.486	1347.23	2.60382	1.38063	0.0065167	0.0186118	Up	25.7363	32.2992	24.1587	7.47225	14.4202	3.57938	VIT_06s0061g00120	Glucan endo-1,3-beta-glucosidase			GO:0005886,GO:0042973,GO:0005975,GO:0006952,GO:0009607	plasma membrane|glucan endo-1,3-beta-D-glucosidase activity|carbohydrate metabolic process|defense response|response to biotic stimulus
J2O13_04G007283	30.362	48.3642	12.3598	0.256084	-1.96531	1.27E-05	7.34E-05	Down	0.235743	0.342741	0.403529	0.96368	1.13955	1.05248
J2O13_04G007289	2665.02	3845.27	1484.76	0.386147	-1.37278	4.44E-08	4.13E-07	Down	4.19127	4.52997	4.03283	10.0321	10.179	6.67496	RPV1	Disease resistance protein RPV1			GO:0005737,GO:0005634,GO:0043531,GO:0050135,GO:0061809,GO:0042803,GO:0050832,GO:0043068,GO:0007165	cytoplasm|nucleus|ADP binding|NAD(P)+ nucleosidase activity|NAD+ nucleotidase, cyclic ADP-ribose generating|protein homodimerization activity|defense response to fungus|positive regulation of programmed cell death|signal transduction
J2O13_04G007293	81.5146	33.6243	129.405	3.83544	1.93939	0.00865021	0.023856	Up	3.08109	1.53357	2.02122	0.115875	0.347402	1.02034	RD22	BURP domain protein RD22			GO:0005768,GO:0005794,GO:0005802,GO:0003729,GO:0009651	endosome|Golgi apparatus|trans-Golgi network|mRNA binding|response to salt stress
J2O13_04G007305	67.9192	39.6751	96.1632	2.42532	1.27818	8.06E-05	0.000388925	Up	2.1183	1.44491	1.53391	0.569184	0.574805	0.58619	ATL21A	Putative RING-H2 finger protein ATL21A			GO:0016020,GO:0046872,GO:0030247,GO:0016740,GO:0016567	membrane|metal ion binding|polysaccharide binding|transferase activity|protein ubiquitination
J2O13_04G007308	648.692	312.035	985.35	3.15905	1.65949	0.00252118	0.00817408	Up	9.87064	9.9243	12.2622	3.13026	4.12157	0.871177	LRK10	Rust resistance kinase Lr10			GO:0005886,GO:0005524,GO:0106310,GO:0004674,GO:0006468	plasma membrane|ATP binding|protein serine kinase activity|protein serine/threonine kinase activity|protein phosphorylation
J2O13_04G007324	149.022	239.409	58.6347	0.245091	-2.02861	6.08E-05	0.000301269	Down	1.01157	1.29394	1.4407	4.7422	5.6567	1.90527	SWEET3	Bidirectional sugar transporter SWEET3			GO:0016020,GO:0005886,GO:0051119,GO:0008643	membrane|plasma membrane|sugar transmembrane transporter activity|carbohydrate transport
J2O13_04G007327	4152.63	6245.48	2059.77	0.329808	-1.6003	0.00456507	0.013687	Down	14.6311	22.3558	17.8934	57.1008	63.0409	12.9847	SIGE	RNA polymerase sigma factor sigE, chloroplastic/mitochondrial			GO:0009507,GO:0005739,GO:0003677,GO:0016987,GO:0071483,GO:0071472,GO:0009658,GO:0006352,GO:0009553,GO:0010207,GO:0045893,GO:2001141,GO:0010218,GO:0010114	chloroplast|mitochondrion|DNA binding|sigma factor activity|cellular response to blue light|cellular response to salt stress|chloroplast organization|DNA-templated transcription initiation|embryo sac development|photosystem II assembly|positive regulation of DNA-templated transcription|regulation of RNA biosynthetic process|response to far red light|response to red light
J2O13_04G007338	58.9226	32.0435	85.8017	2.66732	1.41539	0.00512147	0.0151317	Up	2.3705	1.79564	2.18832	0.480911	0.361078	1.16606	CRF4	Ethylene-responsive transcription factor CRF4			GO:0005737,GO:0005634,GO:0003677,GO:0003700,GO:0009736,GO:0009873,GO:0048366	cytoplasm|nucleus|DNA binding|DNA-binding transcription factor activity|cytokinin-activated signaling pathway|ethylene-activated signaling pathway|leaf development
J2O13_04G007340	4.4809	7.98116	0.98065	0.122592	-3.02807	0.0140161	0.0360056	Down	0.225308	0.226779	0.216938	0.963862	1.84942	1.69745
J2O13_04G007343	376.1	196.512	555.688	2.82561	1.49856	0.0145402	0.0371653	Up	4.93222	3.52164	4.52637	0.672559	0.480768	2.79336	At4g23740	Probable inactive receptor kinase At4g23740			GO:0016020,GO:0005524,GO:0004672,GO:0006468	membrane|ATP binding|protein kinase activity|protein phosphorylation
J2O13_04G007347	4254.61	1257.3	7251.92	5.76815	2.52811	2.20E-28	2.14E-26	Up	42.1972	27.0981	44.4159	4.92966	5.88739	5.3638	ABCC10	ABC transporter C family member 10	ko02010,ko04976,ko01524,ko01523	ABC transporters|Bile secretion|Platinum drug resistance|Antifolate resistance	GO:0005829,GO:0016020,GO:0000325,GO:0008559,GO:0005524,GO:0016887,GO:0042626,GO:0055085	cytosol|membrane|plant-type vacuole|ABC-type xenobiotic transporter activity|ATP binding|ATP hydrolysis activity|ATPase-coupled transmembrane transporter activity|transmembrane transport
J2O13_04G007351	3598.41	2390.89	4805.92	2.0099	1.00712	0.0170098	0.0424185	Up	58.6768	55.8735	62.7809	14.2099	15.112	45.663	PKP2	Plastidial pyruvate kinase 2	ko00010,ko00620,ko04922,ko05203,ko05230,ko05165,ko04930	Glycolysis / Gluconeogenesis|Pyruvate metabolism|Glucagon signaling pathway|Viral carcinogenesis|Central carbon metabolism in cancer|Human papillomavirus infection|Type II diabetes mellitus	GO:0009507,GO:0009570,GO:0005737,GO:0005739,GO:0005524,GO:0016301,GO:0000287,GO:0030955,GO:0004743,GO:0006633,GO:0006096,GO:0006629,GO:0048316,GO:0010431	chloroplast|chloroplast stroma|cytoplasm|mitochondrion|ATP binding|kinase activity|magnesium ion binding|potassium ion binding|pyruvate kinase activity|fatty acid biosynthetic process|glycolytic process|lipid metabolic process|seed development|seed maturation
J2O13_04G007355	27.9853	10.2034	45.7672	4.49899	2.1696	0.00121253	0.00433451	Up	0.368788	0.456262	0.236725	0.0525889	0.107212	0.0321575	At5g24080	G-type lectin S-receptor-like serine/threonine-protein kinase At5g24080			GO:0005886,GO:0005524,GO:0005516,GO:0030246,GO:0106310,GO:0004674,GO:0031625,GO:0006468,GO:0048544	plasma membrane|ATP binding|calmodulin binding|carbohydrate binding|protein serine kinase activity|protein serine/threonine kinase activity|ubiquitin protein ligase binding|protein phosphorylation|recognition of pollen
J2O13_04G007363	127.703	55.9858	199.42	3.55658	1.83049	0.00020121	0.000881709	Up	2.04775	1.94662	2.89179	0.496413	0.233455	0.895179	MAKR5	Membrane-associated kinase regulator 5			GO:0005829,GO:0016020,GO:0005886,GO:0045595,GO:2000280	cytosol|membrane|plasma membrane|regulation of cell differentiation|regulation of root development
J2O13_04G007364	2.98682	0	5.97364	32.1872	5.00841	0.0196979	0.0479475	Up	0.296621	0.38386	0.0816005	0	0	0	At1g64065	Late embryogenesis abundant protein At1g64065			GO:0016020	membrane
J2O13_04G007376	22.9673	32.8643	13.0703	0.39837	-1.32782	0.0115942	0.0306831	Down	0.14061	0.192993	0.172309	0.448409	0.251822	0.342413	CBSDUF5	DUF21 domain-containing protein At5g52790			GO:0043231,GO:0016020,GO:0010960	intracellular membrane-bounded organelle|membrane|magnesium ion homeostasis
J2O13_04G007377	164.993	265.802	64.1844	0.241305	-2.05107	0.000554524	0.00217284	Down	0.283984	1.24192	0.367721	2.14488	2.17833	2.1559	CBSDUF5	DUF21 domain-containing protein At5g52790			GO:0043231,GO:0016020,GO:0010960	intracellular membrane-bounded organelle|membrane|magnesium ion homeostasis
J2O13_04G007381	847.697	544.168	1151.23	2.11593	1.08129	0.000937194	0.00346066	Up	25.071	43.4612	27.2398	12.244	15.1126	9.62955	HIPP39	Heavy metal-associated isoprenylated plant protein 39			GO:0046872	metal ion binding
J2O13_04G007383	49.5828	13.7929	85.3727	6.14847	2.62023	5.59E-07	4.22E-06	Up	0.896834	0.462535	0.556647	0.0507323	0.0790914	0.130294
J2O13_04G007388	5246.11	8978.6	1513.61	0.168603	-2.5683	7.45E-54	4.74E-51	Down	24.3755	24.9216	30.9063	136.002	132.615	120.775	CA2	Beta-carotene hydroxylase 2, chloroplastic	ko00906	Carotenoid biosynthesis	GO:0031969,GO:0052611,GO:0052610,GO:0016787,GO:0005506,GO:0016117	chloroplast membrane|beta-carotene 3-hydroxylase activity|beta-cryptoxanthin hydroxylase activity|hydrolase activity|iron ion binding|carotenoid biosynthetic process
J2O13_04G007394	837.421	1318.35	356.493	0.270396	-1.88685	6.04E-07	4.54E-06	Down	2.15746	2.27626	1.46571	6.13272	7.92873	3.65785	FRO4	Ferric reduction oxidase 4			GO:0005886,GO:0140618,GO:0000293,GO:0046872,GO:0006811	plasma membrane|ferric-chelate reductase (NADH) activity|ferric-chelate reductase activity|metal ion binding|ion transport
J2O13_04G007407	1802.59	2415.44	1189.75	0.492625	-1.02144	2.54E-08	2.47E-07	Down	45.6339	43.812	43.6895	77.9934	79.7086	63.2235
J2O13_04G007411	739.673	1138.27	341.071	0.299541	-1.73917	2.13E-24	1.39E-22	Down	53.6663	53.8691	43.7663	128.968	149.366	137.227
J2O13_04G007424	525.766	143.913	907.619	6.30987	2.65761	3.66E-06	2.36E-05	Up	23.8607	30.3823	24.7181	2.8286	6.08813	1.15511
J2O13_04G007425	5674.83	8166.45	3183.21	0.3898	-1.35919	0.0041916	0.0127024	Down	37.8346	40.1265	39.3222	104.961	105.421	30.9177	CCL9	Probable CoA ligase CCL9	ko00630	Glyoxylate and dicarboxylate metabolism	GO:0005829,GO:0005524,GO:0016405	cytosol|ATP binding|CoA-ligase activity
J2O13_04G007428	891.991	563.156	1220.83	2.16728	1.11589	1.03E-11	1.65E-10	Up	4.37388	3.67517	4.93748	1.43148	1.59215	1.92905	EIX2	Receptor-like protein EIX2			GO:0005886,GO:0050832	plasma membrane|defense response to fungus
J2O13_04G007432	120.908	0	241.815	1304.27	10.349	4.01E-05	0.000206733	Up	1.21399	8.13297	0.113118	0	0	0	LTI65	Low-temperature-induced 65 kDa protein			GO:0009738,GO:0010150,GO:0009737,GO:0009409,GO:0009651,GO:0009414	abscisic acid-activated signaling pathway|leaf senescence|response to abscisic acid|response to cold|response to salt stress|response to water deprivation
J2O13_04G007437	25.5993	41.179	10.0196	0.244123	-2.03432	0.0168261	0.0420251	Down	0.077591	0.117146	0.199222	0.564284	0.605054	0.119077	MYB17	Transcription factor MYB17			GO:0005634,GO:0003677,GO:0003700,GO:0009908,GO:0009909	nucleus|DNA binding|DNA-binding transcription factor activity|flower development|regulation of flower development
J2O13_04G007448	952.231	386.993	1517.47	3.91833	1.97024	2.11E-43	6.25E-41	Up	10.2494	9.04666	10.9251	1.83819	2.017	2.52444	MBD13	Methyl-CpG-binding domain-containing protein 13			GO:0005634,GO:0008327	nucleus|methyl-CpG binding
J2O13_04G007454	245.163	57.2276	433.099	7.54799	2.91609	8.28E-09	8.71E-08	Up	2.63528	2.50275	4.18121	0.218199	0.180262	0.646378	EMS1	Leucine-rich repeat receptor protein kinase EMS1			GO:0016020,GO:0005886,GO:0005524,GO:0106310,GO:0004674,GO:0019199,GO:0010234,GO:0009556,GO:0046777	membrane|plasma membrane|ATP binding|protein serine kinase activity|protein serine/threonine kinase activity|transmembrane receptor protein kinase activity|anther wall tapetum cell fate specification|microsporogenesis|protein autophosphorylation
J2O13_04G007468	49.7121	8.37413	91.05	10.8217	3.43585	0.00398772	0.012182	Up	0.320689	3.16059	0.167253	0.0342975	0.0658088	0.190151	CYP80B2	Probable (S)-N-methylcoclaurine 3'-hydroxylase isozyme 2			GO:0005789,GO:0020037,GO:0005506,GO:0050593,GO:0044550	endoplasmic reticulum membrane|heme binding|iron ion binding|N-methylcoclaurine 3'-monooxygenase activity|secondary metabolite biosynthetic process
J2O13_04G007473	1495.33	937.373	2053.29	2.18977	1.13078	3.45E-13	6.83E-12	Up	36.5874	34.0139	38.7475	12.4644	11.6408	17.3143	NRPB6A	DNA-directed RNA polymerases II, IV and V subunit 6A	ko03020,ko03420,ko04623,ko05016	RNA polymerase|Nucleotide excision repair|Cytosolic DNA-sensing pathway|Huntington disease	GO:0005736,GO:0005665,GO:0005666,GO:0000418,GO:0000419,GO:0003677,GO:0003899,GO:0006351	RNA polymerase I complex|RNA polymerase II, core complex|RNA polymerase III complex|RNA polymerase IV complex|RNA polymerase V complex|DNA binding|DNA-directed 5'-3' RNA polymerase activity|DNA-templated transcription
J2O13_04G007475	9.22784	0.648077	17.8076	26.7349	4.74065	0.000305353	0.00128345	Up	0.588384	0.68106	0.311589	0	0.0241485	0.0246268
J2O13_04G007478	2951.65	4258.08	1645.21	0.386381	-1.37191	7.15E-07	5.29E-06	Down	26.3205	40.7215	29.1971	78.2976	71.0217	53.8923	DAPB3	Dihydrodipicolinate reductase-like protein CRR1, chloroplastic			GO:0009507,GO:0009570,GO:0008839,GO:0019877,GO:0009089,GO:0019684	chloroplast|chloroplast stroma|4-hydroxy-tetrahydrodipicolinate reductase|diaminopimelate biosynthetic process|lysine biosynthetic process via diaminopimelate|photosynthesis, light reaction
J2O13_04G007483	1421.95	2258.87	585.03	0.259009	-1.94893	1.63E-18	6.19E-17	Down	10.6059	11.9652	10.3192	39.3965	35.8752	28.3761
J2O13_04G007495	280.677	31.482	529.872	16.7402	4.06525	2.28E-52	1.27E-49	Up	42.7038	37.3549	50.1678	1.52527	2.12846	2.7811
J2O13_04G007501	344.35	226.824	461.877	2.03376	1.02415	0.000360829	0.00149129	Up	4.64995	4.64073	4.45827	1.40466	1.44444	2.81443	PER66	Peroxidase 66	ko00940	Phenylpropanoid biosynthesis	GO:0005576,GO:0009505,GO:0020037,GO:0140825,GO:0046872,GO:0004601,GO:0042744,GO:0006979	extracellular region|plant-type cell wall|heme binding|lactoperoxidase activity|metal ion binding|peroxidase activity|hydrogen peroxide catabolic process|response to oxidative stress
J2O13_04G007505	69.4568	4.51439	134.399	30.364	4.92429	1.35E-14	3.19E-13	Up	3.59184	3.21013	5.8435	0.158957	0.1525	0.0259201	MADS3	Agamous-like MADS-box protein MADS3			GO:0005634,GO:0000981,GO:0046983,GO:0000978,GO:0009908,GO:0045944,GO:0006357	nucleus|DNA-binding transcription factor activity, RNA polymerase II-specific|protein dimerization activity|RNA polymerase II cis-regulatory region sequence-specific DNA binding|flower development|positive regulation of transcription by RNA polymerase II|regulation of transcription by RNA polymerase II
J2O13_04G007509	5353.31	10089	617.579	0.0612101	-4.03009	4.66E-19	1.88E-17	Down	6.26773	12.7446	7.21208	142.891	143.201	60.1372	GA20OX1	Gibberellin 20 oxidase 1	ko00904	Diterpenoid biosynthesis	GO:0005737,GO:0051213,GO:0103055,GO:0045544,GO:0103054,GO:0103056,GO:0046872,GO:0009908,GO:0009740,GO:0009686,GO:0048366,GO:0009739,GO:0009416,GO:0048575,GO:0009826	cytoplasm|dioxygenase activity|gibberelli A15, 2-oxoglutarate:oxygen oxidoreductase activity|gibberellin 20-oxidase activity|gibberellin A12, 2-oxoglutarate:oxygen oxidoreductase activity (gibberellin A15-forming)|gibberellin A53, 2-oxoglutarate:oxygen oxidoreductase activity|metal ion binding|flower development|gibberellic acid mediated signaling pathway|gibberellin biosynthetic process|leaf dev…
J2O13_04G007514	21.3231	1.44758	41.1986	29.6469	4.88981	3.39E-05	0.000177348	Up	0.524822	0.298576	0.604193	0.0390465	0	0	BHLH126	Transcription factor bHLH126			GO:0090575,GO:0000981,GO:0046983,GO:0000977,GO:0006357	RNA polymerase II transcription regulator complex|DNA-binding transcription factor activity, RNA polymerase II-specific|protein dimerization activity|RNA polymerase II transcription regulatory region sequence-specific DNA binding|regulation of transcription by RNA polymerase II
J2O13_04G007516	523.377	254.652	792.101	3.10822	1.63609	0.00084354	0.00315274	Up	2.30424	3.19639	2.7592	0.44204	0.387331	1.43585	AHG1	Probable protein phosphatase 2C 75	ko04016,ko04075,ko04931	MAPK signaling pathway - plant|Plant hormone signal transduction|Insulin resistance	GO:0005634,GO:0046872,GO:0017018,GO:0004722,GO:0035970,GO:0009737	nucleus|metal ion binding|myosin phosphatase activity|protein serine/threonine phosphatase activity|peptidyl-threonine dephosphorylation|response to abscisic acid
J2O13_04G007519	122.362	15.6866	229.038	14.52	3.85997	0.000137736	0.000631692	Up	6.59283	2.44988	4.26269	0.0163977	0.0943896	0.689857	CUT1	3-ketoacyl-CoA synthase 6	ko00062,ko04626	Fatty acid elongation|Plant-pathogen interaction	GO:0005783,GO:0005789,GO:0005739,GO:0102756,GO:0006633,GO:0009409,GO:0009416,GO:0009826,GO:0010025	endoplasmic reticulum|endoplasmic reticulum membrane|mitochondrion|very-long-chain 3-ketoacyl-CoA synthase activity|fatty acid biosynthetic process|response to cold|response to light stimulus|unidimensional cell growth|wax biosynthetic process
J2O13_04G007541	3.63485	0.338988	6.93071	19.1704	4.26081	0.0132223	0.0342388	Up	0.433861	0.491281	0.208872	0	0.0445164	0	EBP2	Probable rRNA-processing protein EBP2 homolog			GO:0034399,GO:0005730,GO:0030687,GO:0003924,GO:0003723,GO:0042273,GO:0006364	nuclear periphery|nucleolus|preribosome, large subunit precursor|GTPase activity|RNA binding|ribosomal large subunit biogenesis|rRNA processing
J2O13_04G007543	22.4292	33.147	11.7114	0.353119	-1.50177	0.00525048	0.0154539	Down	0.121853	0.0700851	0.117326	0.163832	0.2572	0.30601
J2O13_04G007553	1316.29	1906.58	726.004	0.380849	-1.39271	7.23E-11	1.03E-09	Down	5.99999	7.34392	7.0163	15.773	15.7328	12.1457	LPA2	Protein LPA2			GO:0009507,GO:0031969,GO:0009534,GO:0009536	chloroplast|chloroplast membrane|chloroplast thylakoid|plastid
J2O13_04G007554	1892.96	2554.87	1231.05	0.481919	-1.05314	7.60E-05	0.000368681	Down	10.5716	11.9866	13.6029	24.6976	21.0378	15.225	PPH	Pheophytinase, chloroplastic			GO:0009507,GO:0009570,GO:0009535,GO:0080124,GO:0015996	chloroplast|chloroplast stroma|chloroplast thylakoid membrane|pheophytinase activity|chlorophyll catabolic process
J2O13_04G007559	8105.36	3730.94	12479.8	3.34498	1.742	2.45E-16	7.09E-15	Up	688.026	413.044	579.037	134.666	129.743	149.377		21 kDa protein OS=Daucus carota OX=4039 PE=2 SV=1			GO:0004857	enzyme inhibitor activity
J2O13_04G007560	31.0476	7.65033	54.4449	7.06977	2.82166	0.0137441	0.0354253	Up	4.73038	0.404259	2.23435	0.038182	0.219786	0.635062		21 kDa protein OS=Daucus carota OX=4039 PE=2 SV=1			GO:0004857	enzyme inhibitor activity
J2O13_04G007569	243.628	67.2132	420.043	6.23737	2.64094	1.81E-05	0.000100925	Up	5.00406	1.71428	3.61557	0.215113	0.286263	0.909743	SKS1	Monocopper oxidase-like protein SKS1			GO:0005829,GO:0005886,GO:0009506,GO:0005507,GO:0016491	cytosol|plasma membrane|plasmodesma|copper ion binding|oxidoreductase activity
J2O13_04G007571	3099.3	4365.33	1833.28	0.419981	-1.2516	0.00472044	0.0140893	Down	12.6619	26.4625	24.0654	51.6561	47.9331	21.7128	TPPA	Trehalose-phosphate phosphatase A	ko00500	Starch and sucrose metabolism	GO:0004805,GO:0005992	trehalose-phosphatase activity|trehalose biosynthetic process
J2O13_04G007590	40.3249	11.7372	68.9125	5.82611	2.54253	0.0039806	0.0121635	Up	8.74496	6.69453	10.3176	0.421529	0.303305	3.09313
J2O13_04G007592	36.0136	17.9772	54.0499	3.00222	1.58603	0.0109464	0.0291767	Up	0.411415	1.39138	0.887332	0.239363	0.175607	0.330619	COR2	Non-functional NADPH-dependent codeinone reductase 2			GO:0005829,GO:0016616	cytosol|oxidoreductase activity, acting on the CH-OH group of donors, NAD or NADP as acceptor
J2O13_04G007598	879.13	441.562	1316.7	2.9807	1.57565	0.00489982	0.0145686	Up	9.79685	7.91573	10.5507	1.19918	1.30735	5.62925	TDR	Leucine-rich repeat receptor-like protein kinase TDR			GO:0005886,GO:0005524,GO:0106310,GO:0004674,GO:0051301,GO:0010087,GO:0010067,GO:0006468,GO:0010223,GO:0010089	plasma membrane|ATP binding|protein serine kinase activity|protein serine/threonine kinase activity|cell division|phloem or xylem histogenesis|procambium histogenesis|protein phosphorylation|secondary shoot formation|xylem development
J2O13_04G007604	199.851	63.7122	335.991	5.26811	2.39729	0.00258621	0.00835932	Up	17.6812	2.45104	6.80464	0.996451	0.586622	2.76963	PLAT1	PLAT domain-containing protein 1			GO:0009535,GO:0005783,GO:0000325,GO:0005886,GO:0010287,GO:0099503,GO:0009579,GO:0009409,GO:0009651,GO:0009414	chloroplast thylakoid membrane|endoplasmic reticulum|plant-type vacuole|plasma membrane|plastoglobule|secretory vesicle|thylakoid|response to cold|response to salt stress|response to water deprivation
J2O13_04G007615	753.989	434.22	1073.76	2.47149	1.30538	6.73E-05	0.000331121	Up	14.2217	10.3179	13.8182	3.07477	3.17233	6.78594	TMKL1	Putative kinase-like protein TMKL1			GO:0005886,GO:0009506,GO:0005524,GO:0004672,GO:0006468	plasma membrane|plasmodesma|ATP binding|protein kinase activity|protein phosphorylation
J2O13_04G007618	295.469	436.251	154.687	0.354737	-1.49518	7.11E-08	6.37E-07	Down	2.82846	1.86262	2.36123	5.44504	6.27358	4.52131
J2O13_04G007627	440.633	643.271	237.995	0.369976	-1.4345	0.0164642	0.041266	Down	8.36541	14.4457	5.64969	26.4247	27.9549	7.53369	ERF106	Ethylene-responsive transcription factor ERF106			GO:0005634,GO:0003677,GO:0003700,GO:0009873	nucleus|DNA binding|DNA-binding transcription factor activity|ethylene-activated signaling pathway
J2O13_04G007634	20.5446	34.5701	6.51909	0.189051	-2.40315	0.000830957	0.00311028	Down	0.15007	0.0671332	0.112385	0.542129	0.615918	0.251247	At5g61620	Probable transcription factor At5g61620			GO:0005634,GO:0003677,GO:0003700,GO:0008270,GO:0006355	nucleus|DNA binding|DNA-binding transcription factor activity|zinc ion binding|regulation of DNA-templated transcription
J2O13_04G007644	463.869	227.146	700.592	3.08573	1.62561	0.000600581	0.00233533	Up	24.88	64.0939	41.5074	12.962	14.5587	6.75333
J2O13_04G007649	47.0902	9.84579	84.3346	8.52512	3.09172	0.0129002	0.0335168	Up	5.19617	1.22681	1.76036	0.137217	0	0.698102	LIL3.1	Light-harvesting complex-like protein 3 isotype 1, chloroplastic			GO:0009507,GO:0009535,GO:0005829,GO:0009523,GO:0009503,GO:0042651,GO:0016168,GO:0003700,GO:0019899,GO:0042802,GO:0043495,GO:0015979,GO:1902326,GO:1904964,GO:1904966,GO:0006355	chloroplast|chloroplast thylakoid membrane|cytosol|photosystem II|thylakoid light-harvesting complex|thylakoid membrane|chlorophyll binding|DNA-binding transcription factor activity|enzyme binding|identical protein binding|protein-membrane adaptor activity|photosynthesis|positive regulation of chlorophyll biosynthetic process|positive regulation of phytol biosynthetic process|positive regulation …
J2O13_04G007652	3.44915	0.309089	6.58922	18.2303	4.18827	0.0182173	0.0449391	Up	0.35191	0.974071	0.423545	0	0	0.0736459	PME63	Putative pectinesterase 63	ko00040,ko02020	Pentose and glucuronate interconversions|Two-component system	GO:0005576,GO:0045330,GO:0030599,GO:0042545,GO:0045490	extracellular region|aspartyl esterase activity|pectinesterase activity|cell wall modification|pectin catabolic process
J2O13_04G007674	6925.05	3292.44	10557.7	3.20686	1.68116	9.15E-09	9.53E-08	Up	44.1645	27.4022	38.5231	10.3443	10.6695	6.88727	APC2	Calcium-dependent mitochondrial ATP-magnesium/phosphate carrier protein 2			GO:0005743,GO:0005739,GO:0015217,GO:0080122,GO:0005347,GO:0005509,GO:0015085,GO:0015114,GO:0015866,GO:0080121,GO:0015867,GO:0070588,GO:0035435	mitochondrial inner membrane|mitochondrion|ADP transmembrane transporter activity|AMP transmembrane transporter activity|ATP transmembrane transporter activity|calcium ion binding|calcium ion transmembrane transporter activity|phosphate ion transmembrane transporter activity|ADP transport|AMP transport|ATP transport|calcium ion transmembrane transport|phosphate ion transmembrane transport
J2O13_04G007675	327.07	201.597	452.543	2.24676	1.16785	0.00105945	0.00386048	Up	8.27109	6.45913	6.98741	2.90118	3.31659	1.61819	SDR2b	Short-chain dehydrogenase/reductase 2b	ko00590,ko00790,ko00980,ko05204,ko05208	Arachidonic acid metabolism|Folate biosynthesis|Metabolism of xenobiotics by cytochrome P450|Chemical carcinogenesis - DNA adducts|Chemical carcinogenesis - reactive oxygen species	GO:0005829,GO:0008106	cytosol|alcohol dehydrogenase (NADP+) activity
J2O13_04G007677	6964.08	10950.2	2977.95	0.271953	-1.87857	4.26E-57	3.45E-54	Down	89.0497	80.3055	78.5412	253.247	246.842	249.153
J2O13_04G007679	505.976	682.279	329.673	0.483284	-1.04906	5.13E-05	0.000258308	Down	4.50675	7.33471	6.29902	10.495	11.1129	9.12726	SFH2	Phosphatidylinositol/phosphatidylcholine transfer protein SFH2			GO:0000139,GO:0005886,GO:0006656,GO:0015031	Golgi membrane|plasma membrane|phosphatidylcholine biosynthetic process|protein transport
J2O13_04G007683	44.0725	20.0842	68.0609	3.37642	1.75549	0.00166407	0.00571918	Up	0.99964	0.58188	0.90452	0.0824372	0.266925	0.262129
J2O13_04G007684	847.538	109.438	1585.64	14.4701	3.855	2.71E-08	2.62E-07	Up	50.2353	24.2575	35.3797	0.469525	1.35136	4.72774	ERF114	Ethylene-responsive transcription factor ERF114			GO:0005634,GO:0003700,GO:0000976,GO:0050832,GO:0009873	nucleus|DNA-binding transcription factor activity|transcription cis-regulatory region binding|defense response to fungus|ethylene-activated signaling pathway
J2O13_04G007690	3.93116	0.338988	7.52333	20.831	4.38066	0.00799231	0.0222379	Up	0.25448	0.153685	0.171518	0	0.0208888	0	At5g13980	Probable alpha-mannosidase At5g13980			GO:0048046,GO:0000325,GO:0099503,GO:0005773,GO:0004559,GO:0030246,GO:0046872,GO:0006013	apoplast|plant-type vacuole|secretory vesicle|vacuole|alpha-mannosidase activity|carbohydrate binding|metal ion binding|mannose metabolic process
J2O13_04G007692	137.058	59.3955	214.72	3.60687	1.85075	0.00207513	0.00692474	Up	1.55508	0.873925	1.79677	0.133052	0.223384	0.640032	AGD1	ADP-ribosylation factor GTPase-activating protein AGD1	ko04144	Endocytosis	GO:0030139,GO:0005768,GO:0005886,GO:0035618,GO:0005096,GO:0046872,GO:0007010,GO:0048768	endocytic vesicle|endosome|plasma membrane|root hair|GTPase activator activity|metal ion binding|cytoskeleton organization|root hair cell tip growth
J2O13_04G007698	776.932	407.774	1146.09	2.80914	1.49013	0.000175822	0.000784351	Up	8.41574	5.6689	8.4717	1.40456	1.54458	3.82929	PHS1	Dual specificity protein phosphatase PHS1			GO:0005737,GO:0016301,GO:0017018,GO:0004721,GO:0004725,GO:0008138,GO:0009738,GO:0043622,GO:0006470,GO:0010468,GO:0010119,GO:0009737	cytoplasm|kinase activity|myosin phosphatase activity|phosphoprotein phosphatase activity|protein tyrosine phosphatase activity|protein tyrosine/serine/threonine phosphatase activity|abscisic acid-activated signaling pathway|cortical microtubule organization|protein dephosphorylation|regulation of gene expression|regulation of stomatal movement|response to abscisic acid
J2O13_04G007699	5.8921	10.5144	1.26976	0.122811	-3.02549	0.0131406	0.0340619	Down	0.0466547	0	0.134764	0.47901	0.382961	0.351492	PHS1	Dual specificity protein phosphatase PHS1			GO:0005737,GO:0016301,GO:0017018,GO:0004721,GO:0004725,GO:0008138,GO:0009738,GO:0043622,GO:0006470,GO:0010468,GO:0010119,GO:0009737	cytoplasm|kinase activity|myosin phosphatase activity|phosphoprotein phosphatase activity|protein tyrosine phosphatase activity|protein tyrosine/serine/threonine phosphatase activity|abscisic acid-activated signaling pathway|cortical microtubule organization|protein dephosphorylation|regulation of gene expression|regulation of stomatal movement|response to abscisic acid
J2O13_04G007700	518.925	66.2234	971.627	14.6394	3.87179	3.21E-09	3.60E-08	Up	14.557	12.4698	16.4304	0.378569	0.266341	1.91366	SCPL45	Serine carboxypeptidase-like 45			GO:0005576,GO:0009505,GO:0009506,GO:0004185,GO:0006508	extracellular region|plant-type cell wall|plasmodesma|serine-type carboxypeptidase activity|proteolysis
J2O13_04G007706	825.429	360.341	1290.52	3.57956	1.83978	0.000479749	0.00191231	Up	21.6846	12.2222	14.2675	1.83528	2.20598	7.46107	BCL1	Basic helix-loop-helix protein 80			GO:0005634,GO:0046983,GO:0009740,GO:0006355	nucleus|protein dimerization activity|gibberellic acid mediated signaling pathway|regulation of DNA-templated transcription
J2O13_04G007711	54.7696	30.237	79.3022	2.63273	1.39656	0.00796398	0.022166	Up	1.87276	1.30345	1.61136	0.613657	0.621438	0.233486	RCOM_1504680	CASP-like protein 1F1			GO:0005886,GO:0051539	plasma membrane|4 iron, 4 sulfur cluster binding
J2O13_04G007712	4937.44	6993.28	2881.61	0.412067	-1.27905	2.75E-06	1.83E-05	Down	15.2347	18.2928	16.3646	37.0833	38.0743	23.2463
J2O13_04G007717	258.303	125.669	390.938	3.1063	1.6352	0.000326198	0.00136206	Up	12.9478	19.4342	12.3575	2.62376	2.48611	7.09898	NAC083	NAC domain-containing protein 83			GO:0005634,GO:0003677,GO:0003700,GO:0010150,GO:0045892,GO:0009737,GO:0009651,GO:0010089	nucleus|DNA binding|DNA-binding transcription factor activity|leaf senescence|negative regulation of DNA-templated transcription|response to abscisic acid|response to salt stress|xylem development
J2O13_04G007729	106.34	59.6319	153.048	2.56884	1.36112	0.017735	0.043944	Up	3.73085	1.46883	1.16649	0.789189	0.757133	0.472497	HHT1	Omega-hydroxypalmitate O-feruloyl transferase	ko00073	Cutin, suberine and wax biosynthesis	GO:0016747,GO:0050734,GO:0102406,GO:0052325,GO:0010345	acyltransferase activity, transferring groups other than amino-acyl groups|hydroxycinnamoyltransferase activity|omega-hydroxypalmitate O-sinapoyl transferase activity|cell wall pectin biosynthetic process|suberin biosynthetic process
J2O13_04G007733	1634.55	2215.61	1053.49	0.475474	-1.07256	0.000798808	0.00300447	Down	12.7112	12.9811	7.13278	21.2128	20.1056	15.123	ACR4	ACT domain-containing protein ACR4			GO:0009506	plasmodesma
J2O13_04G007738	20.711	0.700884	40.7212	60.1949	5.91157	2.08E-06	1.41E-05	Up	2.51935	0.887532	1.77889	0.0359258	0.0344665	0
J2O13_04G007742	530.667	746.641	314.693	0.421314	-1.24703	3.79E-14	8.49E-13	Down	10.0994	12.698	10.0229	20.0246	21.5313	22.6791
J2O13_04G007744	122.809	46.6323	198.986	4.27224	2.09499	0.0185621	0.0456695	Up	2.53653	11.7605	1.84471	1.63922	1.08534	0.31624	WRKY75	Probable WRKY transcription factor 75			GO:0005634,GO:0003700,GO:0000978,GO:0000976,GO:0010055,GO:0048527,GO:0000122,GO:0043620,GO:0032107	nucleus|DNA-binding transcription factor activity|RNA polymerase II cis-regulatory region sequence-specific DNA binding|transcription cis-regulatory region binding|atrichoblast differentiation|lateral root development|negative regulation of transcription by RNA polymerase II|regulation of DNA-templated transcription in response to stress|regulation of response to nutrient levels
J2O13_04G007747	755.069	400.154	1109.98	2.7722	1.47103	5.01E-06	3.14E-05	Up	12.3017	8.73216	11.7696	2.30188	2.52043	5.10807	SPL13A	Squamosa promoter-binding-like protein 13A			GO:0005634,GO:0003677,GO:0003700,GO:0046872,GO:0048653,GO:0006355	nucleus|DNA binding|DNA-binding transcription factor activity|metal ion binding|anther development|regulation of DNA-templated transcription
J2O13_04G007754	353.302	206.095	500.51	2.42676	1.27903	8.46E-14	1.80E-12	Up	9.09118	9.01448	7.48435	2.66026	2.77413	3.28173
J2O13_04G007758	3005.94	4613.72	1398.17	0.303054	-1.72236	6.88E-19	2.71E-17	Down	47.109	38.8114	37.1551	124.974	106.268	101.338	At4g24930	Thylakoid lumenal 17.9 kDa protein, chloroplastic			GO:0009507,GO:0009543,GO:0005829,GO:0009579,GO:0031977	chloroplast|chloroplast thylakoid lumen|cytosol|thylakoid|thylakoid lumen
J2O13_04G007773	450.547	243.833	657.261	2.69616	1.43091	7.47E-09	7.90E-08	Up	16.5083	18.8043	12.1455	5.27366	4.21621	5.01967	At1g67340	F-box protein At1g67340			GO:0005634,GO:0046872,GO:0016567	nucleus|metal ion binding|protein ubiquitination
J2O13_04G007780	2011.74	999.581	3023.91	3.02401	1.59646	8.21E-22	4.26E-20	Up	30.3858	28.9495	25.6021	6.67021	6.88684	9.78126	KING1	SNF1-related protein kinase regulatory subunit gamma-1			GO:0005524,GO:0019887,GO:0005975,GO:0006633,GO:0042128	ATP binding|protein kinase regulator activity|carbohydrate metabolic process|fatty acid biosynthetic process|nitrate assimilation
J2O13_04G007782	8.94708	2.24633	15.6478	6.81099	2.76786	0.00361173	0.0111811	Up	0.288076	0.289957	0.332848	0.0164317	0.0157643	0.0803827	CYP94B1	Cytochrome P450 94B1			GO:0016020,GO:0020037,GO:0005506,GO:0052694,GO:0016705,GO:0009694,GO:0009611	membrane|heme binding|iron ion binding|jasmonoyl-isoleucine-12-hydroxylase activity|oxidoreductase activity, acting on paired donors, with incorporation or reduction of molecular oxygen|jasmonic acid metabolic process|response to wounding
J2O13_04G007793	17.6636	5.22344	30.1037	5.70613	2.51251	0.00123649	0.00440866	Up	3.14473	1.18697	1.64011	0.168163	0.21511	0.493584
J2O13_04G007810	6.8785	0.309089	13.4479	37.234	5.21855	0.00434622	0.0131	Up	0.0553152	0.695955	0.372821	0	0	0.0231522
J2O13_04G007816	12.7345	1.42468	24.0443	17.446	4.12482	0.000418063	0.00169769	Up	4.36222	1.42052	3.58249	0.32932	0.105314	0
J2O13_04G007817	416.106	121.772	710.439	5.84048	2.54609	4.20E-06	2.68E-05	Up	20.0781	14.6899	10.519	2.94132	2.52754	0.759158	SAT	Stemmadenine O-acetyltransferase			GO:0016746,GO:0016491,GO:0009820	acyltransferase activity|oxidoreductase activity|alkaloid metabolic process
J2O13_04G007820	237.183	102.486	371.879	3.63116	1.86043	8.09E-14	1.73E-12	Up	2.74833	2.10901	3.24042	0.558701	0.671481	0.600685	SAT	Stemmadenine O-acetyltransferase	ko00940,ko00945,ko00941	Phenylpropanoid biosynthesis|Stilbenoid, diarylheptanoid and gingerol biosynthesis|Flavonoid biosynthesis	GO:0016746,GO:0016491,GO:0009820	acyltransferase activity|oxidoreductase activity|alkaloid metabolic process
J2O13_04G007842	16161	22980	9342.03	0.406528	-1.29857	2.48E-10	3.27E-09	Down	199.229	222.117	158.973	424.232	391.857	354.288	CBBY	CBBY-like protein			GO:0009507,GO:0009941,GO:0009570,GO:0005829,GO:0016787,GO:0046872	chloroplast|chloroplast envelope|chloroplast stroma|cytosol|hydrolase activity|metal ion binding
J2O13_04G007847	8245	1992.43	14497.6	7.2772	2.86338	3.45E-29	3.59E-27	Up	236.258	161.52	209.567	24.1604	26.0495	17.772	At5g63180	Probable pectate lyase 22	ko00040,ko02024	Pentose and glucuronate interconversions|Quorum sensing	GO:0009536,GO:0046872,GO:0030570,GO:0045490	plastid|metal ion binding|pectate lyase activity|pectin catabolic process
J2O13_04G007848	2027	1166.57	2887.43	2.47532	1.30761	7.25E-06	4.41E-05	Up	71.1014	48.4453	38.4826	17.1599	19.9546	15.2131	BT1	BTB/POZ and TAZ domain-containing protein 1			GO:0005737,GO:0005634,GO:0005516,GO:0046872,GO:0009553,GO:0009555,GO:0016567,GO:0006355,GO:0009733,GO:0042542,GO:0009751	cytoplasm|nucleus|calmodulin binding|metal ion binding|embryo sac development|pollen development|protein ubiquitination|regulation of DNA-templated transcription|response to auxin|response to hydrogen peroxide|response to salicylic acid
J2O13_04G007856	2150.02	1248.2	3051.84	2.44538	1.29006	0.000225088	0.000974834	Up	42.2396	45.8592	46.6047	16.1564	19.7699	8.63539	SOBIR1	Leucine-rich repeat receptor-like serine/threonine/tyrosine-protein kinase SOBIR1			GO:0005777,GO:0005886,GO:0005524,GO:0106310,GO:0004674,GO:0004713,GO:0004714,GO:0006952,GO:0060862,GO:0010942,GO:0031349	peroxisome|plasma membrane|ATP binding|protein serine kinase activity|protein serine/threonine kinase activity|protein tyrosine kinase activity|transmembrane receptor protein tyrosine kinase activity|defense response|negative regulation of floral organ abscission|positive regulation of cell death|positive regulation of defense response
J2O13_04G007859	28336.2	38481.5	18190.9	0.472709	-1.08098	9.26E-28	8.64E-26	Down	165.958	162.889	146.364	262.667	262.525	304.954	PIMT1	Protein-L-isoaspartate O-methyltransferase 1			GO:0005737,GO:0004719,GO:0007568,GO:0030091,GO:0009737,GO:0009651,GO:0009845	cytoplasm|protein-L-isoaspartate (D-aspartate) O-methyltransferase activity|aging|protein repair|response to abscisic acid|response to salt stress|seed germination
J2O13_04G007867	2983.69	4336.81	1630.57	0.375947	-1.4114	5.92E-34	9.01E-32	Down	14.5584	12.6462	12.1742	27.3557	27.6982	31.3787	QS	Quinolinate synthase, chloroplastic	ko00760	Nicotinate and nicotinamide metabolism	GO:0009507,GO:0051539,GO:0008047,GO:0046872,GO:0042803,GO:0008987,GO:0034628,GO:0009060,GO:0016226,GO:0009435,GO:0051176	chloroplast|4 iron, 4 sulfur cluster binding|enzyme activator activity|metal ion binding|protein homodimerization activity|quinolinate synthetase A activity|'de novo' NAD biosynthetic process from aspartate|aerobic respiration|iron-sulfur cluster assembly|NAD biosynthetic process|positive regulation of sulfur metabolic process
J2O13_04G007868	665.029	417.646	912.412	2.18522	1.12778	2.25E-08	2.20E-07	Up	19.9761	27.2948	24.2168	8.39073	9.98274	8.49094	NRT3.1	High-affinity nitrate transporter 3.1			GO:0005886,GO:0015112,GO:0042128,GO:0015706,GO:0010167,GO:0009611	plasma membrane|nitrate transmembrane transporter activity|nitrate assimilation|nitrate transmembrane transport|response to nitrate|response to wounding
J2O13_04G007872	138.965	258.686	19.2433	0.0744708	-3.74718	1.43E-21	7.30E-20	Down	0.180229	0.213419	0.224573	2.54889	2.602	1.59745
J2O13_04G007873	812.13	1497.43	126.83	0.0846893	-3.56168	2.00E-20	9.16E-19	Down	2.19171	2.25504	1.78202	24.5028	23.734	11.2255
J2O13_04G007888	896.127	492.672	1299.58	2.63878	1.39987	1.50E-12	2.71E-11	Up	19.2093	19.0141	16.242	5.48636	6.44581	4.98518	LECRKS1	L-type lectin-domain containing receptor kinase S.1			GO:0000325,GO:0005886,GO:0005524,GO:0030246,GO:0106310,GO:0004675,GO:0042742,GO:0002229,GO:0006468	plant-type vacuole|plasma membrane|ATP binding|carbohydrate binding|protein serine kinase activity|transmembrane receptor protein serine/threonine kinase activity|defense response to bacterium|defense response to oomycetes|protein phosphorylation
[truncated: 2,374 more rows]

## Sheet: Table S5
Table S5 GO enrichment analysis of all up-regulated DEGs from diploids and tetraploids.
[truncated: 1,449 more rows]

[truncated: 8 more sheets: Table S6, Table S7, Table S8, Table S9, Table S10, Table S11, Table S12, Table S13]
